# Supplementary material for: Translation inhibitory elements from Hoxa3 and Hoxa11 mRNAs use uORFs for translation inhibition
Source: eLife. 2021 Jun 2;10:e66369. doi: 10.7554/eLife.66369 (PMC8172242; doi:10.7554/eLife.66369)
Supplement: Supplementary file 2. [file elife-66369-supp2.xls]

## Sheet: Description
NEW ANALYSIS SUBMISSION FORM - Proteomics Platform
Date			2019-11-15
Name			Fatima Alghoul
Group leader			G.Eriani
Institute or UPR number			UPR9002
email address
Telephone number
Samples
	Sample format										Staining method
			1D SDS-PAGE spot										Colloidal Coomassie Blue
			2D spot										Coomassie Blue (R250)
			non-denaturing gel spot										Silver staining
			1D SDS PAGE entire lane										Sypro ruby
													other staining. Specify.
			Dried sample : quantity of protein and optimal buffer composition required
			Liquid sample : concentration of protein and buffer composition required
			any other. Specify
Description of the experiment
	1st round ?
	Type of analysis
			1D band or 2D spot characterisation (protein identifications)
			Recombinant protein's quality control (the default enzyme is Trypsin)
			Recombinant protein's quality control with any other enzyme. Specify
			Targeted analysis (protein's accession number to be specified)
			Structural analysis (interaction site, post-translational modification, chemical adduct, etc.)
			Differential analysis (IP, DIGE, etc.) Negatives control(s) are necessary
			Intact mass measurement
					by MALDI-TOF
					by ESI-Q-TOF
	2nd round ? (samples are stored for a month and can be analysed again under new conditions (targeted analysis for exemple). Please ask in due time if further analysis are required)
Bioinformatics analysis
			Default analysis			Uniprot/all
									Sequenced organism : Rabit (Uniprot)
									closest sequenced Organism :
			Home-made database : xxx
			(Please send the fasta file)
			For the recombinant protein's quality control (or for any other analysis requiring a special protein sequence), please paste below the sequence + Tag of the protein
Quality Control:
2019-11-15	QExactive+:		Sample		A3_1	A3_2	A3_3		A11_1	A11_2	A11_3		globin_1	globin_2	globin_3
	160min		.dat file (Trypin/P, Rabit_UP): 20191202/		F016000	F016002	F016006		F016008	F016009	F016012		F016013	F016014	F016016

## Sheet: Invoice
Invoice - Plateforme Proteomique Strasbourg Esplanade
Contacts : Philippe Hammann: p.hammann@ibmc-cnrs.unistra.fr Lauriane Kuhn: l.kuhn@ibmc-cnrs.unistra.fr Philippe Wolff: p.wolff@ibmc-cnrs.unistra.fr Johana Chicher : j.chicher@ibmc-cnrs.unistra.fr					Adress : PLATEFORME PROTEOMIQUE STRASBOURG ESPLANADE IBMC FRC1589 CNRS 15, rue René Descartes, 67084 Strasbourg cedex Tél: 03 88 41 70 03 Fax : 03 88 60 22 36
Name of the applicant	Date of analysis	Plate code	Number of analyses		Price U. € exclusive of tax	Description
Laboratory
F.Alghoul	2019-11-15	2018_S46	9		75	9 in solution trypsin digestion
G.Eriani UPR9002						9 LC-MS/MS with a 160 mn nanoLC gradient (150 EHT/run)
Total :					675	Facturé au tarif partenaire (50% sur le tarif injection 90min)
Price exclusive of tax
Analyses	Price	Analysis code	Analysis code	Quantity	Total
Identification of proteins		CNRS	Private
MALDI
Sequenced Organisms
MALDI analysis quantity<=16	25	2672	2671			price function of the number of analyses
Analyse MALDI haut débit 16<quantité<=32	20	2672	2671			Database : choose
MALDI analysis quantity>32	15	2672	2671			MASCOT research algorythm
						Validation following MASCOT publication's "guidelines"
Non-sequenced organisms
De novo sequencing, logiciel peaks	75	2693	2692
ESI MSMS
LC MS MS analysis-30 minutes	50	2684	2682			price function of the chromatographic gradient's lenght
LC MS MS analysis-1hour	100	2685	2683			Protein mixture : complexity increases : longer gradient
LC MS MS analysis-90 minutes	150
Bio-informatics
Home-made database	50	2695	2694			Creation of your own database in MASCOT
						( .fasta format)
Recombinant protein quality control
Quality control Trypsine	50	2689	2688			Sequence vs spectra : maximum sequence recovery
Quality control other enzyme	75	2691	2690			Sequence vs spectra : maximum sequence recovery
Intact protein analysis	200	2701	2700			ESI MS direct injection : full mass analysis
ELECTROPHORESIS
automatic cutting of spots	2 E per spot	2704	2703
IEF Equipement(1-2 days) 7cm	15	2706	2705
IEF Equipement(1-2 days) 17cm	20	2708	2707
IEF Equipement(1-2 days), Big gel (17 cm)	15	2710	2709
SDS PAGE 4-12 % MES buffer 8cm	20	2712	2711
Colloïdal blue staining 7cm	10	2714	2713
Colloïdal blue staining 17cm	15	2716	2715
Silver Staining 7cm	10	2718	2717
Coloration Argent 17cm	15	2720	2719
DIGE buffers : 400 pmol Cy3, Cy5, Cy2	100	2724	2723
proQ diamond : 100 ml	50	2722	2721
Total
In-House Training
The day	300	2737	2736
Platform comment	Order form creation :				Order form reception :

## Sheet: COMPARE S46
nanoLC-MSMS RESULTS: proteins
Validation at FDR<1% (False-Discovery Rate)
LEGEND:		Score				Mascot Score: Mascot is the algorithm used for database searching (probability score: the higher it is, the more probable is the presence of a given protein in the sample)
		Proteins				Number of protein accessions that are identified for this set of peptide (sameset, subset). Samesets are accessions that share all the peptides identified. Subsets are accessions that share some peptides only
		is validated				TRUE= passes the False positive rate filter
		Peptides				Number of peptides identified for this protein. One sequence with and one sequence without modification count for 2 different peptides
		#peptide_matches				Spectral count
		Spectral Count				Number of fragmentation MS/MS spectra observed for a given protein (MS/MS spectra are those on which you can read the amino acids sequence of a given peptide)
						Needed for "Spectral Count" quantification: this method gives you an idea about how a given protein is abundant in your mixture (the higher the number of spectra is, the most abundant your protein is)
		#specific_peptide_matches				Number of spectra not shared with another protein from the database
		#sequences				a peptidic sequence : only the aminoacid sequence matters (One sequence with and one sequence without modification count for 1)
		# spectra (BASIC Spectral Count)				= 1 spectrum
		# spectra (BASIC Spectral Count)				= 2-5 spectra
		# spectra (BASIC Spectral Count)				= 6-10 spectra
		# spectra (BASIC Spectral Count)				= 11-30 spectra
		# spectra (BASIC Spectral Count)				>= 31 spectra
Total number of identified proteins:
				2018_S46_GMP-PNP
Sample				A3_1					A3_2					A3_3					A11_1					A11_2					A11_3					Globin_1					Globin_2					Globin_3
Total number of proteins identified by Mascot in Uniprot_RABIT and validated at FDR<1% by Proline (ProFI consortium)						602					673					608					583					567					528					603					590					603
Total number of spectra identified by Mascot in Uniprot_RABIT and validated at FDR<1% by Proline (ProFI consortium)						14761					15939					15357					16842					17687					16130					15614					15697					15144
contaminants
sp|P02769|ALBU_BOVIN	ALB			Typical	45	215	197	214.459	Typical	38	181	162	180.304	Typical	35	152	134	151.381	Typical	31	154	135	153.149	Typical	39	179	163	178.691	Typical	30	114	105	113.923	Typical	37	205	192	204.845	Typical	33	174	157	173.613	Typical	30	140	127	139.691
sp|P00761|TRYP_PIG				Typical	7	41	41	41	Typical	6	36	36	36	Typical	7	38	38	38	Typical	4	38	38	38	Typical	5	43	43	43	Typical	7	41	41	41	Typical	4	38	38	38	Typical	4	38	38	38	Typical	4	34	34	34
Proteins identified with FDR<1%:
				2018_S46_GMP-PNP
				Basic Spectral Counting
Accession	ProtRibosomale ?	Description		A3_1					A3_2					A3_3					A11_1					A11_2					A11_3					Globin_1					Globin_2					Globin_3
Protein Set		Overview		Status F016000_1	Peptides Count F016000_1	Basic SC F016000_1	Specific SC F016000_1	Weighted SC F016000_1	Status F016002_2	Peptides Count F016002_2	Basic SC F016002_2	Specific SC F016002_2	Weighted SC F016002_2	Status F016006_3	Peptides Count F016006_3	Basic SC F016006_3	Specific SC F016006_3	Weighted SC F016006_3	Status F016008_4	Peptides Count F016008_4	Basic SC F016008_4	Specific SC F016008_4	Weighted SC F016008_4	Status F016009_5	Peptides Count F016009_5	Basic SC F016009_5	Specific SC F016009_5	Weighted SC F016009_5	Status F016012_6	Peptides Count F016012_6	Basic SC F016012_6	Specific SC F016012_6	Weighted SC F016012_6	Status F016013_7	Peptides Count F016013_7	Basic SC F016013_7	Specific SC F016013_7	Weighted SC F016013_7	Status F016014_8	Peptides Count F016014_8	Basic SC F016014_8	Specific SC F016014_8	Weighted SC F016014_8	Status F016016_9	Peptides Count F016016_9	Basic SC F016016_9	Specific SC F016016_9	Weighted SC F016016_9
tr|G1SS70|G1SS70_RABIT	RPS3A	40S ribosomal protein S3a OS=Oryctolagus cuniculus (Rabbit) GN=RPS3A PE=1 SV=1		Typical	25	135	83	129.83	Typical	25	119	61	113.233	Typical	25	119	65	113.631	Typical	23	136	67	129.139	Typical	25	170	85	161.548	Typical	28	175	96	167.145	Typical	21	117	65	111.83	Typical	23	113	58	107.531	Typical	24	110	54	104.432
tr|G1TA47|G1TA47_RABIT	RPS4X	40S ribosomal protein S4 OS=Oryctolagus cuniculus (Rabbit) PE=3 SV=2		Typical	20	132	20	95.8605	Typical	23	139	22	101.247	Typical	23	147	23	106.988	Typical	24	161	32	119.375	Typical	25	170	33	125.794	Typical	22	188	27	136.049	Typical	22	140	24	102.57	Typical	20	134	26	99.1512	Typical	20	126	26	93.7326
tr|G1TNM3|G1TNM3_RABIT	RPS3	Uncharacterized protein OS=Oryctolagus cuniculus (Rabbit) PE=1 SV=2		Typical	29	125	125	125	Typical	28	127	127	127	Typical	28	115	115	115	Typical	24	145	145	145	Typical	27	162	162	162	Typical	25	130	130	130	Typical	21	100	100	100	Typical	21	109	109	109	Typical	23	115	115	115
tr|G1TTD6|G1TTD6_RABIT	RPS4	40S ribosomal protein S4 OS=Oryctolagus cuniculus (Rabbit) GN=LOC100355379 PE=3 SV=1		Typical	20	120	8	44.1395	Typical	23	127	10	47.7529	Typical	23	133	9	49.0116	Typical	23	140	11	52.625	Typical	25	159	22	66.2064	Typical	21	176	15	66.9506	Typical	22	128	12	49.4302	Typical	20	118	10	44.8488	Typical	20	114	14	46.2674
tr|G1T3D9|G1T3D9_RABIT	RPS8	40S ribosomal protein S8 OS=Oryctolagus cuniculus (Rabbit) PE=3 SV=1		Typical	20	91	91	91	Typical	18	87	87	87	Typical	18	92	92	92	Typical	16	92	92	92	Typical	16	115	115	115	Typical	20	126	126	126	Typical	12	64	64	64	Typical	12	65	65	65	Typical	11	61	61	61
tr|G1TN62|G1TN62_RABIT	RPS19 (InterPro)	Uncharacterized protein OS=Oryctolagus cuniculus (Rabbit) GN=LOC100345774 PE=1 SV=1		Typical	10	88	68	87.154	Typical	10	97	72	95.9425	Typical	10	86	62	84.9848	Typical	12	117	81	115.477	Typical	11	109	71	107.393	Typical	12	111	76	109.519	Typical	10	69	49	68.154	Typical	11	65	45	64.154	Typical	9	59	42	58.2809
tr|G1TU13|G1TU13_RABIT	RPS17	Uncharacterized protein OS=Oryctolagus cuniculus (Rabbit) GN=RPS17 PE=1 SV=1		Typical	13	83	83	83	Typical	14	86	86	86	Typical	15	80	80	80	Typical	14	82	82	82	Typical	15	81	81	81	Typical	14	120	120	120	Typical	11	70	70	70	Typical	12	64	64	64	Typical	11	66	66	66
tr|G1TUT9|G1TUT9_RABIT	RPS5 (InterPro)	Uncharacterized protein OS=Oryctolagus cuniculus (Rabbit) GN=RPS2 PE=1 SV=1		Typical	16	78	23	72.3806	Typical	15	83	23	76.402	Typical	15	65	13	59.1653	Typical	13	57	14	51.935	Typical	13	70	24	64.7337	Typical	13	105	28	97.6335	Typical	13	54	13	49.146	Typical	11	57	17	52.3021	Typical	14	57	18	52.2073
tr|G1TM55|G1TM55_RABIT	RPS6	40S ribosomal protein S6 OS=Oryctolagus cuniculus (Rabbit) GN=LOC100339133 PE=1 SV=1		Typical	13	75	75	75	Typical	14	83	83	83	Typical	13	77	77	77	Typical	15	94	94	94	Typical	14	103	103	103	Typical	14	116	116	116	Typical	11	59	59	59	Typical	12	74	74	74	Typical	12	74	74	74
tr|G1TFM5|G1TFM5_RABIT	RPS5	Uncharacterized protein OS=Oryctolagus cuniculus (Rabbit) GN=RPS5 PE=1 SV=1		Typical	18	71	71	71	Typical	20	72	72	72	Typical	17	63	63	63	Typical	18	80	80	80	Typical	18	93	93	93	Typical	18	101	101	101	Typical	16	51	51	51	Typical	15	53	53	53	Typical	15	53	53	53
tr|G1SFR8|G1SFR8_RABIT	RPS12	40S ribosomal protein S12 OS=Oryctolagus cuniculus (Rabbit) GN=RPS12 PE=1 SV=1		Typical	12	65	65	65	Typical	13	83	83	83	Typical	13	88	88	88	Typical	13	104	104	104	Typical	13	114	114	114	Typical	16	138	138	138	Typical	8	71	71	71	Typical	13	81	81	81	Typical	12	79	79	79
tr|B7NZS8|B7NZS8_RABIT	RPS9	Ribosomal protein S9 (Predicted) OS=Oryctolagus cuniculus (Rabbit) GN=RPS9 PE=1 SV=1		Typical	17	65	65	65	Typical	19	60	60	60	Typical	17	60	60	60	Typical	21	74	74	74	Typical	17	81	81	81	Typical	19	87	87	87	Typical	15	48	48	48	Typical	18	44	44	44	Typical	17	46	46	46
tr|G1TPG3|G1TPG3_RABIT	RPS13 (InterPro)	Uncharacterized protein OS=Oryctolagus cuniculus (Rabbit) GN=LOC100356144 PE=1 SV=1		Typical	16	62	62	62	Typical	18	69	69	69	Typical	16	67	67	67	Typical	18	99	99	99	Typical	18	99	99	99	Typical	19	91	91	91	Typical	17	65	65	65	Typical	18	70	70	70	Typical	18	68	68	68
tr|G1U482|G1U482_RABIT	RPS3A	40S ribosomal protein S3a OS=Oryctolagus cuniculus (Rabbit) GN=LOC100352147 PE=3 SV=1		Typical	13	62	10	15.1705	Typical	12	64	6	11.767	Typical	12	60	6	11.3693	Typical	11	78	9	15.8608	Typical	12	97	12	20.4517	Typical	13	88	9	16.8551	Typical	11	58	6	11.1705	Typical	11	61	6	11.4687	Typical	11	62	6	11.5682
tr|G1SVB0|G1SVB0_RABIT	RPS7	Uncharacterized protein OS=Oryctolagus cuniculus (Rabbit) GN=RPS7 PE=1 SV=1		Typical	13	62	62	62	Typical	14	66	66	66	Typical	14	67	67	67	Typical	13	89	89	89	Typical	14	95	95	95	Typical	14	73	73	73	Typical	11	58	58	58	Typical	11	51	51	51	Typical	12	61	61	61
tr|G1TRM4|G1TRM4_RABIT	RPS11	Uncharacterized protein OS=Oryctolagus cuniculus (Rabbit) GN=RPS11 PE=1 SV=1		Typical	19	60	60	60	Typical	18	54	54	54	Typical	17	56	56	56	Typical	14	68	68	68	Typical	15	87	87	87	Typical	19	87	87	87	Typical	12	40	40	40	Typical	13	48	48	48	Typical	13	52	52	52
tr|G1SGX4|G1SGX4_RABIT	RPS16	Uncharacterized protein OS=Oryctolagus cuniculus (Rabbit) GN=RPS16 PE=1 SV=1		Typical	13	55	55	55	Typical	11	67	67	67	Typical	11	68	68	68	Typical	14	89	89	89	Typical	16	100	100	100	Typical	14	85	85	85	Typical	12	49	49	49	Typical	13	51	51	51	Typical	13	54	54	54
tr|G1SP51|G1SP51_RABIT	RPS13	Uncharacterized protein OS=Oryctolagus cuniculus (Rabbit) GN=RPS13 PE=1 SV=1		Typical	10	54	54	54	Typical	9	62	62	62	Typical	9	59	59	59	Typical	9	80	80	80	Typical	9	100	100	100	Typical	9	83	83	83	Typical	9	70	70	70	Typical	9	69	69	69	Typical	9	62	62	62
tr|G1T3D8|G1T3D8_RABIT	RPS24	40S ribosomal protein S24 OS=Oryctolagus cuniculus (Rabbit) GN=RPS24 PE=1 SV=1		Typical	9	50	50	50	Typical	9	62	62	62	Typical	9	60	60	60	Typical	8	68	68	68	Typical	6	63	63	63	Typical	8	67	67	67	Typical	6	53	53	53	Typical	6	42	42	42	Typical	6	34	34	34
tr|G1U2Z9|G1U2Z9_RABIT	RPS5 (InterPro)	Uncharacterized protein OS=Oryctolagus cuniculus (Rabbit) PE=1 SV=2		Typical	10	50	2	3.00516	Subset	9	51	0	1.05912	Subset	9	44	0	0.911308	Typical	9	38	1	1.76004	Typical	8	40	1	1.80523	Subset	7	64	0	1.35636	Subset	7	34	0	0.699159	Subset	6	34	0	0.699159	Subset	8	31	0	0.634823
tr|G1SZ47|G1SZ47_RABIT	RPS23	Uncharacterized protein OS=Oryctolagus cuniculus (Rabbit) GN=RPS23 PE=1 SV=1		Typical	9	49	49	49	Typical	8	45	45	45	Typical	8	35	35	35	Typical	8	43	43	43	Typical	8	49	49	49	Typical	9	54	54	54	Typical	8	37	37	37	Typical	7	33	33	33	Typical	8	35	35	35
tr|G1TGI6|G1TGI6_RABIT	RPSA	Uncharacterized protein OS=Oryctolagus cuniculus (Rabbit) PE=1 SV=1		Typical	13	49	0	0	Typical	12	44	0	0	Typical	11	44	0	0	Typical	14	57	0	0	Typical	14	64	0	0	Typical	13	47	0	0	Sameset	10	30	0	0	Typical	12	34	0	0	Typical	11	36	0	0
tr|G1T1F0|G1T1F0_RABIT	RPS14	Uncharacterized protein OS=Oryctolagus cuniculus (Rabbit) GN=LOC100337691 PE=1 SV=1		Typical	9	45	45	45	Typical	9	52	52	52	Typical	9	48	48	48	Typical	9	59	59	59	Typical	9	56	56	56	Typical	9	60	60	60	Typical	9	51	51	51	Typical	9	48	48	48	Typical	9	46	46	46
tr|G1TQM9|G1TQM9_RABIT	RPSA	40S ribosomal protein SA OS=Oryctolagus cuniculus (Rabbit) GN=RPSA PE=3 SV=2		Typical	12	43	0	0	Typical	11	37	0	0	Typical	10	39	0	0	Typical	13	47	0	0	Typical	13	60	0	0	Typical	14	45	0	0	Typical	9	28	0	0	Typical	11	32	0	0	Typical	10	33	0	0
tr|G1TG89|G1TG89_RABIT	RPS15A	Uncharacterized protein OS=Oryctolagus cuniculus (Rabbit) GN=RPS15A PE=1 SV=1		Typical	10	42	42	42	Typical	10	37	37	37	Typical	10	42	42	42	Typical	11	44	44	44	Typical	10	46	46	46	Typical	9	57	57	57	Typical	9	31	31	31	Typical	8	25	25	25	Typical	8	25	25	25
tr|G1T168|G1T168_RABIT	RPS10	Uncharacterized protein OS=Oryctolagus cuniculus (Rabbit) PE=1 SV=2		Typical	7	37	37	37	Typical	8	32	32	32	Typical	6	25	25	25	Typical	7	37	37	37	Typical	9	44	44	44	Typical	6	27	27	27	Typical	5	26	26	26	Typical	4	24	24	24	Typical	5	23	23	23
tr|G1SIZ2|G1SIZ2_RABIT	RPS10 (InterPro)	Uncharacterized protein OS=Oryctolagus cuniculus (Rabbit) GN=LOC100354063 PE=1 SV=1		Typical	8	37	37	37	Typical	8	35	35	35	Typical	10	42	42	42	Typical	9	42	42	42	Typical	8	46	46	46	Typical	7	43	43	43	Typical	7	30	30	30	Typical	6	29	29	29	Typical	6	26	26	26
tr|G1TWL4|G1TWL4_RABIT	RPSA	40S ribosomal protein SA OS=Oryctolagus cuniculus (Rabbit) GN=LOC100340199 PE=1 SV=2		Typical	8	37	0	0	Typical	8	37	0	0	Typical	8	39	0	0	Typical	11	51	0	0	Typical	10	59	0	0	Typical	9	41	0	0	Typical	7	31	0	0	Typical	10	34	0	0	Typical	9	34	0	0
tr|G1SWM1|G1SWM1_RABIT	RPS5 (InterPro)	Uncharacterized protein OS=Oryctolagus cuniculus (Rabbit) PE=1 SV=1		Typical	11	33	3	7.61421	Typical	11	39	3	8.53885	Typical	11	35	3	7.92342	Typical	9	32	4	8.30501	Typical	9	32	3	7.4611	Typical	10	45	6	12.0101	Typical	10	31	4	8.15488	Typical	8	29	3	6.99879	Typical	11	30	3	7.15787
tr|G1U7M4|G1U7M4_RABIT	RPS29	Uncharacterized protein OS=Oryctolagus cuniculus (Rabbit) GN=LOC100337712 PE=1 SV=1		Typical	4	32	32	32	Typical	5	29	29	29	Typical	5	33	33	33	Typical	3	24	24	24	Typical	4	24	24	24	Typical	4	16	16	16	Typical	3	13	13	13	Typical	2	12	12	12	Typical	2	11	11	11
tr|G1TDB3|G1TDB3_RABIT	RPS25	Uncharacterized protein OS=Oryctolagus cuniculus (Rabbit) GN=RPS25 PE=1 SV=1		Typical	9	27	27	27	Typical	8	28	28	28	Typical	7	29	29	29	Typical	8	32	32	32	Typical	7	34	34	34	Typical	9	34	34	34	Typical	7	29	29	29	Typical	6	25	25	25	Typical	7	26	26	26
tr|G1TRV4|G1TRV4_RABIT	RPS19 (InterPro)	Uncharacterized protein OS=Oryctolagus cuniculus (Rabbit) GN=RPS19 PE=4 SV=1		Typical	3	22	2	2.84602	Typical	3	26	1	2.05753	Typical	3	25	1	2.01523	Typical	5	41	5	6.52284	Typical	5	44	6	7.60745	Typical	4	38	3	4.48054	Typical	3	21	1	1.84602	Typical	4	23	3	3.84602	Typical	4	20	3	3.71912
tr|G1U0Q2|G1U0Q2_RABIT	RPS19 (InterPro)	Uncharacterized protein OS=Oryctolagus cuniculus (Rabbit) GN=LOC103349305 PE=1 SV=1		Typical	4	17	17	17	Typical	5	27	27	27	Typical	4	13	13	13	Typical	4	19	19	19	Typical	4	17	17	17	Typical	5	18	18	18	Typical	4	17	17	17	Typical	3	15	15	15	Typical	3	15	15	15
tr|G1TL29|G1TL29_RABIT	RPS27 (Interpro)	40S ribosomal protein S27 OS=Oryctolagus cuniculus (Rabbit) GN=RPS27L PE=3 SV=1		Typical	5	17	1	13.5714	Typical	6	21	1	16.7143	Typical	3	17	0	13.3571	Typical	7	28	5	23.0714	Subset	4	25	0	19.6429	Subset	4	19	0	14.9286	Typical	4	18	1	14.3571	Typical	5	15	1	12	Typical	5	18	2	14.5714
tr|G1TZ76|G1TZ76_RABIT	RPS27	40S ribosomal protein S27 OS=Oryctolagus cuniculus (Rabbit) GN=RPS27 PE=1 SV=1		Subset	4	16	0	3.42857	Subset	5	20	0	4.28571	Sameset	3	17	0	3.64286	Subset	5	23	0	4.92857	Typical	5	26	1	6.35714	Typical	5	20	1	5.07143	Subset	3	17	0	3.64286	Subset	4	14	0	3	Typical	5	17	1	4.42857
tr|G1TIB4|G1TIB4_RABIT	RPS28 (InterPro)	Uncharacterized protein OS=Oryctolagus cuniculus (Rabbit) GN=RPS28 PE=1 SV=1		Typical	4	16	16	16	Typical	6	25	25	25	Typical	6	22	22	22	Typical	6	27	27	27	Typical	6	41	41	41	Typical	5	31	31	31	Typical	4	23	23	23	Typical	5	30	30	30	Typical	5	23	23	23
tr|G1TM82|G1TM82_RABIT	RPS21	40S ribosomal protein S21 OS=Oryctolagus cuniculus (Rabbit) GN=RPS21 PE=1 SV=1		Typical	4	15	15	15	Typical	5	20	20	20	Typical	4	21	21	21	Typical	4	21	21	21	Typical	4	22	22	22	Typical	4	27	27	27	Typical	4	23	23	23	Typical	3	19	19	19	Typical	3	20	20	20
tr|G1T8A2|G1T8A2_RABIT	RPS30 FAU	Uncharacterized protein OS=Oryctolagus cuniculus (Rabbit) GN=FAU PE=1 SV=1		Typical	2	11	11	11	Typical	2	15	15	15	Typical	2	12	12	12	Typical	2	11	11	11	Typical	3	16	16	16	Typical	2	20	20	20	Typical	2	11	11	11	Typical	2	12	12	12	Typical	2	11	11	11
tr|G1TFE8|G1TFE8_RABIT	RPS26	Uncharacterized protein OS=Oryctolagus cuniculus (Rabbit) GN=RPS26 PE=1 SV=1		Typical	2	4	4	4	Typical	2	4	4	4	Typical	2	6	6	6	Typical	2	5	5	5	Typical	2	7	7	7	Typical	1	4	4	4	Typical	2	5	5	5	Typical	1	3	3	3	Typical	2	5	5	5
tr|G1T373|G1T373_RABIT	PRPS1	Uncharacterized protein OS=Oryctolagus cuniculus (Rabbit) GN=PRPS1 PE=3 SV=1		Typical	2	2	2	2	Typical	2	2	2	2	Typical	1	1	1	1	Typical	2	2	2	2		0	0	0	0		0	0	0	0		0	0	0	0		0	0	0	0		0	0	0	0
tr|G1T139|G1T139_RABIT	RPS5 (InterPro)	Uncharacterized protein OS=Oryctolagus cuniculus (Rabbit) GN=TRAP1 PE=4 SV=2		Typical	1	2	2	2	Typical	1	3	3	3	Typical	1	3	3	3	Typical	1	2	2	2	Typical	1	3	3	3	Typical	1	3	3	3	Typical	1	2	2	2	Typical	1	2	2	2		0	0	0	0
tr|G1U4N1|G1U4N1_RABIT	RPS6KA1	Ribosomal protein S6 kinase OS=Oryctolagus cuniculus (Rabbit) GN=RPS6KA1 PE=3 SV=2		Typical	1	1	1	1		0	0	0	0		0	0	0	0		0	0	0	0		0	0	0	0		0	0	0	0		0	0	0	0		0	0	0	0		0	0	0	0
tr|G1SYJ6|G1SYJ6_RABIT	RPL5	60S ribosomal protein L5 OS=Oryctolagus cuniculus (Rabbit) GN=RPL5 PE=1 SV=1		Typical	22	111	111	111	Typical	22	119	119	119	Typical	23	109	109	109	Typical	26	148	148	148	Typical	27	178	178	178	Typical	25	222	222	222	Typical	20	111	111	111	Typical	20	101	101	101	Typical	22	99	99	99
tr|G1TL06|G1TL06_RABIT	RPL3	Uncharacterized protein OS=Oryctolagus cuniculus (Rabbit) GN=RPL3 PE=1 SV=1		Typical	23	99	99	99	Typical	24	114	114	114	Typical	23	105	105	105	Typical	26	152	152	152	Typical	26	169	169	169	Typical	25	166	166	166	Typical	20	114	114	114	Typical	22	120	120	120	Typical	25	133	133	133
tr|G1SVW5|G1SVW5_RABIT	RPL4	Uncharacterized protein OS=Oryctolagus cuniculus (Rabbit) GN=RPL4 PE=1 SV=2		Typical	27	92	92	92	Typical	24	103	103	103	Typical	24	97	97	97	Typical	25	145	145	145	Typical	28	185	185	185	Typical	30	173	173	173	Typical	23	115	115	115	Typical	23	122	122	122	Typical	25	132	132	132
tr|G1SCJ6|G1SCJ6_RABIT	RPL22 (InterPro)	Uncharacterized protein OS=Oryctolagus cuniculus (Rabbit) GN=RPL17 PE=3 SV=1		Typical	12	90	26	88.3268	Typical	12	102	29	100.092	Typical	12	102	28	100.065	Typical	13	149	53	146.49	Typical	13	158	61	155.464	Typical	11	101	26	99.0392	Typical	11	80	26	78.5882	Typical	13	81	25	79.536	Typical	13	79	24	77.5621
tr|G1TT27|G1TT27_RABIT	RPL8	Uncharacterized protein OS=Oryctolagus cuniculus (Rabbit) GN=RPL8 PE=1 SV=1		Typical	12	71	71	71	Typical	14	81	81	81	Typical	14	68	68	68	Typical	15	80	80	80	Typical	13	84	84	84	Typical	15	106	106	106	Typical	11	71	71	71	Typical	12	69	69	69	Typical	12	62	62	62
tr|B7NZQ2|B7NZQ2_RABIT	RPL10	Ribosomal protein L10 (Predicted) OS=Oryctolagus cuniculus (Rabbit) GN=RPL10 PE=1 SV=1		Typical	14	70	70	70	Typical	18	78	78	78	Typical	18	82	82	82	Typical	18	94	94	94	Typical	17	107	107	107	Typical	20	121	121	121	Typical	13	58	58	58	Typical	12	54	54	54	Typical	14	62	62	62
tr|G1SKZ8|G1SKZ8_RABIT	RPL10A	Ribosomal protein OS=Oryctolagus cuniculus (Rabbit) GN=RPL10A PE=3 SV=2		Typical	8	68	68	68	Typical	9	68	68	68	Typical	10	71	71	71	Typical	11	92	92	92	Typical	12	106	106	106	Typical	11	116	116	116	Typical	10	81	81	81	Typical	10	82	82	82	Typical	9	75	75	75
tr|G1SKF7|G1SKF7_RABIT	RPL6	60S ribosomal protein L6 OS=Oryctolagus cuniculus (Rabbit) GN=RPL6 PE=3 SV=1		Typical	18	67	67	67	Typical	20	76	76	76	Typical	21	77	77	77	Typical	21	92	92	92	Typical	20	113	113	113	Typical	19	114	114	114	Typical	18	73	73	73	Typical	20	85	85	85	Typical	20	77	77	77
tr|G1T0C1|G1T0C1_RABIT	RPL15	Ribosomal protein L15 OS=Oryctolagus cuniculus (Rabbit) GN=RPL15 PE=1 SV=1		Typical	11	63	63	63	Typical	12	86	86	86	Sameset	10	77	77	77	Typical	12	83	83	83	Typical	11	108	108	108	Sameset	9	94	94	94	Typical	10	72	72	72	Typical	10	78	78	78	Typical	10	72	72	72
tr|G1SV32|G1SV32_RABIT	RPL7	Uncharacterized protein OS=Oryctolagus cuniculus (Rabbit) GN=RPL7 PE=3 SV=1		Typical	20	62	13	60.9348	Typical	18	68	16	66.8696	Typical	18	68	15	66.8478	Typical	20	83	15	81.5217	Typical	19	91	15	89.3478	Typical	18	108	22	106.13	Typical	17	64	13	62.8913	Typical	16	60	14	59	Typical	14	60	12	58.9565
tr|G1TDL2|G1TDL2_RABIT	RPL30 (InterPro)	Uncharacterized protein OS=Oryctolagus cuniculus (Rabbit) GN=RPL30 PE=3 SV=1		Typical	9	54	54	54	Typical	11	58	58	58	Typical	11	56	56	56	Typical	10	68	68	68	Typical	11	91	91	91	Typical	12	82	82	82	Typical	7	44	44	44	Typical	8	51	51	51	Typical	7	46	46	46
tr|G1U7L1|G1U7L1_RABIT	RPL28 (InterPro)	Uncharacterized protein OS=Oryctolagus cuniculus (Rabbit) GN=LOC100358162 PE=1 SV=1		Typical	13	53	53	53	Typical	10	66	66	66	Typical	12	58	58	58	Typical	11	80	80	80	Typical	11	85	85	85	Typical	12	81	81	81	Typical	11	53	53	53	Typical	9	45	45	45	Typical	11	49	49	49
tr|G1TPV0|G1TPV0_RABIT	RPL13	60S ribosomal protein L13 OS=Oryctolagus cuniculus (Rabbit) GN=LOC100352571 PE=3 SV=1		Typical	11	51	51	51	Typical	10	56	56	56	Typical	10	53	53	53	Typical	11	66	66	66	Typical	13	83	83	83	Typical	11	89	89	89	Typical	11	52	52	52	Typical	12	57	57	57	Typical	12	50	50	50
tr|Q0QEW4|Q0QEW4_RABIT	RPL18	Ribosomal protein L18 OS=Oryctolagus cuniculus (Rabbit) GN=RPL18 PE=2 SV=1		Typical	12	50	12	40.9103	Typical	13	61	16	50.4831	Typical	13	71	16	57.1022	Typical	13	95	22	75.4862	Typical	12	92	17	72.5146	Typical	13	78	26	64.8816	Typical	10	56	7	43.8959	Typical	9	60	12	48.2339	Typical	11	65	11	51.2054
tr|G1SQH0|G1SQH0_RABIT	RPL26	Uncharacterized protein OS=Oryctolagus cuniculus (Rabbit) GN=RPL26 PE=1 SV=1		Typical	10	50	25	47.5871	Typical	10	60	30	57.1046	Typical	11	59	29	56.1046	Typical	12	67	36	64.008	Typical	12	96	51	91.6568	Typical	11	86	46	82.1394	Typical	11	70	38	66.9115	Typical	10	74	40	70.7185	Typical	11	71	42	68.2011
tr|G1TUB1|G1TUB1_RABIT	RPL30 (InterPro)	Uncharacterized protein OS=Oryctolagus cuniculus (Rabbit) GN=RPL7 PE=4 SV=1		Subset	16	49	0	1.06522	Subset	15	52	0	1.13043	Subset	15	53	0	1.15217	Typical	17	69	1	2.47826	Typical	17	77	1	2.65217	Subset	15	86	0	1.86957	Subset	15	51	0	1.1087	Typical	15	47	1	2	Subset	12	48	0	1.04348
tr|G1TTY7|G1TTY7_RABIT	RPL18A	Uncharacterized protein OS=Oryctolagus cuniculus (Rabbit) GN=RPL18A PE=3 SV=1		Typical	7	45	45	45	Typical	10	46	46	46	Typical	9	48	48	48	Typical	11	55	55	55	Typical	9	53	53	53	Typical	13	77	77	77	Typical	7	31	31	31	Typical	7	24	24	24	Typical	7	24	24	24
tr|G1U6N2|G1U6N2_RABIT	RPLP0	60S acidic ribosomal protein P0 OS=Oryctolagus cuniculus (Rabbit) GN=RPLP0 PE=1 SV=1		Typical	12	45	8	32.2556	Typical	13	47	8	33.5667	Typical	13	42	8	30.2889	Typical	13	60	5	41.0556	Typical	13	67	8	46.6778	Typical	13	66	7	45.6778	Typical	11	49	5	33.8444	Typical	12	44	4	30.2222	Typical	12	54	6	37.4667
tr|G1SHQ2|G1SHQ2_RABIT	RPL21 (InterPro)	Uncharacterized protein OS=Oryctolagus cuniculus (Rabbit) GN=RPL21 PE=1 SV=1		Typical	10	42	42	42	Typical	9	40	40	40	Typical	10	45	45	45	Typical	11	58	58	58	Typical	8	62	62	62	Typical	9	67	67	67	Typical	9	41	41	41	Typical	8	46	46	46	Typical	9	47	47	47
tr|G1TUB8|G1TUB8_RABIT	RPL11	Uncharacterized protein OS=Oryctolagus cuniculus (Rabbit) GN=RPL11 PE=1 SV=2		Typical	9	40	40	40	Typical	9	44	44	44	Typical	10	44	44	44	Typical	9	58	58	58	Typical	11	59	59	59	Typical	10	68	68	68	Typical	8	37	37	37	Typical	9	45	45	45	Typical	9	43	43	43
tr|G1STW0|G1STW0_RABIT	RPL7 (InterPro)	Uncharacterized protein OS=Oryctolagus cuniculus (Rabbit) PE=1 SV=1		Typical	12	39	26	33.2065	Typical	15	53	35	44.9783	Typical	13	47	30	39.4239	Typical	17	70	49	60.6413	Typical	16	79	59	70.087	Typical	15	69	48	59.6413	Typical	12	46	31	39.3152	Typical	12	55	40	48.3152	Typical	12	57	39	48.9783
tr|G1SE28|G1SE28_RABIT	RPL24	Uncharacterized protein OS=Oryctolagus cuniculus (Rabbit) GN=RPL24 PE=4 SV=1		Typical	10	38	38	38	Typical	10	42	42	42	Typical	11	43	43	43	Typical	11	58	58	58	Typical	9	53	53	53	Typical	10	70	70	70	Typical	7	34	34	34	Typical	8	36	36	36	Typical	8	35	35	35
tr|G1SPK4|G1SPK4_RABIT	RPLP0	60S acidic ribosomal protein P0 OS=Oryctolagus cuniculus (Rabbit) GN=RPLP0 PE=3 SV=2		Typical	10	38	1	13.7444	Typical	11	42	3	16.4333	Typical	12	37	3	14.7111	Typical	13	61	6	24.9444	Typical	12	68	9	29.3222	Typical	12	62	3	23.3222	Typical	11	46	2	17.1556	Typical	12	42	2	15.7778	Typical	13	50	2	18.5333
tr|G1SMR7|G1SMR7_RABIT	RPL12	Uncharacterized protein OS=Oryctolagus cuniculus (Rabbit) GN=RPL12 PE=1 SV=1		Typical	8	36	36	36	Typical	8	43	43	43	Typical	10	45	45	45	Typical	10	71	71	71	Typical	12	86	86	86	Typical	11	74	74	74	Typical	8	54	54	54	Typical	9	59	59	59	Typical	9	61	61	61
tr|G1U8P2|G1U8P2_RABIT	RPL19	Ribosomal protein L19 OS=Oryctolagus cuniculus (Rabbit) PE=3 SV=1		Typical	7	34	11	25.1209	Typical	8	38	12	27.9628	Typical	8	38	13	28.3488	Typical	9	45	14	33.0326	Typical	8	46	17	34.8047	Typical	7	53	23	41.4186	Typical	7	29	15	23.5953	Typical	8	28	13	22.2093	Typical	8	34	14	26.2791
tr|G1TH09|G1TH09_RABIT	RPL7/8 (InterPro)	Uncharacterized protein OS=Oryctolagus cuniculus (Rabbit) GN=LOC100341006 PE=4 SV=1		Typical	10	34	21	26.7935	Typical	12	46	28	36.0217	Typical	11	39	22	29.5761	Typical	11	61	40	49.3587	Typical	10	62	42	50.913	Typical	11	56	35	44.3587	Typical	8	42	27	33.6848	Typical	9	51	36	42.6848	Typical	10	54	36	44.0217
tr|G1SZ12|G1SZ12_RABIT	RPL14	Uncharacterized protein OS=Oryctolagus cuniculus (Rabbit) GN=RPL14 PE=4 SV=1		Typical	9	32	32	32	Typical	9	37	37	37	Typical	9	35	35	35	Typical	11	43	43	43	Typical	9	38	38	38	Typical	11	63	63	63	Typical	7	26	26	26	Typical	9	29	29	29	Typical	8	25	25	25
tr|G1T6D1|G1T6D1_RABIT	RPL14 (InterPro)	Uncharacterized protein OS=Oryctolagus cuniculus (Rabbit) GN=RPL23 PE=1 SV=1		Typical	9	31	31	31	Typical	10	34	34	34	Typical	9	32	32	32	Typical	10	53	53	53	Typical	11	77	77	77	Typical	11	92	92	92	Typical	7	51	51	51	Typical	8	49	49	49	Typical	10	44	44	44
tr|G1SNY0|G1SNY0_RABIT	RPL27A	Uncharacterized protein OS=Oryctolagus cuniculus (Rabbit) GN=LOC100350771 PE=1 SV=1		Typical	8	31	31	31	Typical	9	35	35	35	Typical	6	31	31	31	Typical	8	45	45	45	Typical	10	48	48	48	Typical	9	42	42	42	Typical	7	27	27	27	Typical	8	32	32	32	Typical	6	28	28	28
tr|G1SHG0|G1SHG0_RABIT	RPL31	Uncharacterized protein OS=Oryctolagus cuniculus (Rabbit) GN=RPL31 PE=1 SV=1		Typical	9	31	31	31	Typical	9	32	32	32	Typical	12	34	34	34	Typical	10	44	44	44	Typical	9	46	46	46	Typical	11	57	57	57	Typical	8	26	26	26	Typical	8	35	35	35	Typical	8	33	33	33
tr|G1SY53|G1SY53_RABIT	RPL37 (InterPro)	Uncharacterized protein OS=Oryctolagus cuniculus (Rabbit) GN=RPL37A PE=1 SV=1		Typical	4	31	31	31	Typical	4	29	29	29	Typical	4	33	33	33	Typical	4	34	34	34	Typical	5	35	35	35	Typical	5	44	44	44	Typical	4	30	30	30	Typical	4	24	24	24	Typical	4	26	26	26
tr|G1TVS8|G1TVS8_RABIT	RPL13 (InterPro)	Uncharacterized protein OS=Oryctolagus cuniculus (Rabbit) GN=RPL13A PE=4 SV=1		Typical	8	29	24	28.3296	Typical	9	41	37	40.4637	Typical	9	37	32	36.3296	Typical	10	48	43	47.3296	Typical	8	47	42	46.3296	Typical	10	52	46	51.1955	Typical	7	33	30	32.5978	Typical	7	29	26	28.5978	Typical	9	33	30	32.5978
tr|G1TX70|G1TX70_RABIT	RPL18 (InterPro)	Uncharacterized protein OS=Oryctolagus cuniculus (Rabbit) GN=RPL18 PE=4 SV=1		Typical	6	29	7	14.4381	Typical	7	34	9	17.4524	Typical	6	41	6	17.8333	Typical	7	61	10	27.2429	Typical	7	64	14	30.9048	Typical	6	40	7	18.1571	Typical	6	37	7	17.1429	Typical	4	34	5	14.8048	Typical	6	41	6	17.8333
tr|G1SHU8|G1SHU8_RABIT	RPL32	Uncharacterized protein OS=Oryctolagus cuniculus (Rabbit) GN=RPL32 PE=4 SV=1		Typical	6	29	29	29	Typical	10	37	37	37	Typical	7	29	29	29	Typical	9	40	40	40	Typical	10	44	44	44	Typical	9	48	48	48	Typical	7	33	33	33	Typical	7	38	38	38	Typical	7	34	34	34
tr|G1TU00|G1TU00_RABIT	RPL26L1	Uncharacterized protein OS=Oryctolagus cuniculus (Rabbit) GN=RPL26L1 PE=3 SV=2		Typical	10	28	3	5.41287	Typical	8	31	1	3.89544	Typical	9	33	3	5.89544	Typical	9	41	10	12.992	Typical	10	52	7	11.3432	Typical	9	43	3	6.86059	Typical	9	34	2	5.08847	Typical	8	38	4	7.2815	Typical	8	32	3	5.79893
tr|G1TYL6|G1TYL6_RABIT	RPL19	Ribosomal protein L19 OS=Oryctolagus cuniculus (Rabbit) GN=RPL19 PE=3 SV=1		Typical	7	27	4	12.8791	Typical	9	37	11	21.0372	Typical	9	34	9	18.6512	Typical	10	41	10	21.9674	Typical	9	40	11	22.1953	Typical	8	42	12	23.5814	Typical	8	24	10	15.4047	Typical	9	22	7	12.7907	Typical	9	29	9	16.7209
tr|G1TXF6|G1TXF6_RABIT	RPL27	60S ribosomal protein L27 OS=Oryctolagus cuniculus (Rabbit) GN=LOC100356974 PE=1 SV=1		Typical	5	22	22	22	Typical	8	31	31	31	Typical	6	24	24	24	Typical	8	39	39	39	Typical	8	46	46	46	Typical	6	38	38	38	Typical	7	27	27	27	Typical	7	31	31	31	Typical	7	31	31	31
tr|G1TSG1|G1TSG1_RABIT	RPL22	Uncharacterized protein OS=Oryctolagus cuniculus (Rabbit) GN=RPL22 PE=4 SV=1		Typical	4	17	17	17	Typical	4	19	19	19	Typical	4	20	20	20	Typical	5	24	24	24	Typical	5	26	26	26	Typical	4	23	23	23	Typical	4	19	19	19	Typical	4	21	21	21	Typical	4	16	16	16
tr|G1SE76|G1SE76_RABIT	RPL23 (InterPro)	Uncharacterized protein OS=Oryctolagus cuniculus (Rabbit) GN=RPL23A PE=1 SV=1		Typical	6	17	17	17	Typical	6	18	18	18	Typical	5	17	17	17	Typical	6	26	26	26	Typical	6	25	25	25	Typical	7	33	33	33	Typical	6	22	22	22	Typical	5	21	21	21	Typical	7	24	24	24
tr|G1SIT5|G1SIT5_RABIT	RPL35	Uncharacterized protein OS=Oryctolagus cuniculus (Rabbit) GN=RPL35 PE=1 SV=1		Typical	4	17	17	17	Typical	4	20	20	20	Typical	4	18	18	18	Typical	4	25	25	25	Typical	4	22	22	22	Typical	4	26	26	26	Typical	4	20	20	20	Typical	4	17	17	17	Typical	4	15	15	15
tr|G1U945|G1U945_RABIT	RPL34 (InterPro)	Uncharacterized protein OS=Oryctolagus cuniculus (Rabbit) GN=LOC100354714 PE=1 SV=1		Sameset	6	14	14	14	Sameset	6	15	15	15	Sameset	5	9	9	9	Typical	7	14	14	14	Typical	6	20	20	20	Typical	7	14	14	14	Typical	7	13	13	13	Typical	6	14	14	14	Typical	7	12	12	12
tr|G1SF08|G1SF08_RABIT	RPL35A	Uncharacterized protein OS=Oryctolagus cuniculus (Rabbit) GN=RPL35A PE=1 SV=1		Typical	7	12	12	12	Typical	8	19	19	19	Typical	7	16	16	16	Typical	8	19	19	19	Typical	9	29	29	29	Typical	7	21	21	21	Typical	8	20	20	20	Typical	8	14	14	14	Typical	8	21	21	21
tr|G1T040|G1T040_RABIT	RPL44E (Interpro)	Uncharacterized protein OS=Oryctolagus cuniculus (Rabbit) GN=RPL36A-HNRNPH2 PE=1 SV=1		Typical	5	12	12	12	Typical	5	12	12	12	Typical	6	11	11	11	Typical	7	23	23	23	Typical	8	25	25	25	Typical	4	12	12	12	Typical	4	6	6	6	Typical	4	7	7	7	Typical	6	11	11	11
tr|G1TP80|G1TP80_RABIT	RPL13 (InterPro)	Uncharacterized protein OS=Oryctolagus cuniculus (Rabbit) PE=3 SV=1		Typical	2	11	6	6.67039	Typical	2	10	6	6.53631	Typical	2	9	4	4.67039	Typical	2	12	7	7.67039	Typical	2	11	6	6.67039	Typical	3	13	7	7.80447	Typical	2	9	6	6.40223	Typical	2	6	3	3.40223	Typical	2	6	3	3.40223
tr|G1T8F8|G1T8F8_RABIT	RPL22L1	Uncharacterized protein OS=Oryctolagus cuniculus (Rabbit) GN=RPL22L1 PE=4 SV=1		Typical	4	10	10	10	Typical	4	14	14	14	Typical	4	10	10	10	Typical	4	19	19	19	Typical	5	26	26	26	Typical	4	18	18	18	Typical	4	9	9	9	Typical	3	6	6	6	Typical	4	10	10	10
tr|G1SYU7|G1SYU7_RABIT	RPL39 (InterPro)	Uncharacterized protein OS=Oryctolagus cuniculus (Rabbit) PE=1 SV=1		Typical	2	8	8	8	Typical	1	8	8	8	Typical	1	7	7	7	Typical	1	20	20	20	Typical	1	17	17	17	Typical	1	11	11	11	Typical	1	8	8	8	Typical	1	8	8	8	Typical	1	9	9	9
sp|P19943|RLA2_RABIT	RPLP2	60S acidic ribosomal protein P2 OS=Oryctolagus cuniculus (Rabbit) GN=RPLP2 PE=1 SV=1		Typical	3	8	8	8	Typical	3	11	11	11	Typical	3	12	12	12	Typical	3	16	16	16	Typical	2	12	12	12	Typical	4	26	26	26	Typical	2	13	13	13	Typical	2	11	11	11	Typical	2	10	10	10
tr|U3KPD5|U3KPD5_RABIT	RPL37	Ribosomal protein L37 OS=Oryctolagus cuniculus (Rabbit) GN=RPL37 PE=1 SV=1		Typical	1	6	6	6	Typical	1	2	2	2		0	0	0	0	Typical	1	2	2	2	Typical	1	1	1	1	Typical	1	2	2	2	Typical	1	2	2	2		0	0	0	0		0	0	0	0
tr|G1U001|G1U001_RABIT	RPL38 (InterPro)	Uncharacterized protein OS=Oryctolagus cuniculus (Rabbit) GN=LOC100352574 PE=3 SV=1		Typical	2	6	6	6	Typical	3	8	8	8	Typical	3	9	9	9	Typical	4	14	14	14	Typical	4	22	22	22	Typical	4	16	16	16	Typical	2	7	7	7	Typical	3	10	10	10	Typical	4	11	11	11
tr|G1SGR6|G1SGR6_RABIT	RPL29	Uncharacterized protein OS=Oryctolagus cuniculus (Rabbit) GN=RPL29 PE=1 SV=2		Typical	2	5	5	5	Typical	1	5	5	5	Typical	1	4	4	4	Typical	4	8	8	8	Typical	2	7	7	7	Typical	2	6	6	6	Typical	1	4	4	4	Typical	2	4	4	4	Typical	2	5	5	5
tr|G1T8P4|G1T8P4_RABIT	RPLP1	Uncharacterized protein OS=Oryctolagus cuniculus (Rabbit) GN=RPLP1 PE=3 SV=1		Typical	2	5	5	5	Typical	2	5	5	5	Typical	2	5	5	5	Typical	3	8	8	8	Typical	2	4	4	4	Typical	1	4	4	4	Typical	2	4	4	4	Typical	2	5	5	5	Typical	3	6	6	6
sp|P29562|IF4A1_RABIT	EIF4A1	Eukaryotic initiation factor 4A-I OS=Oryctolagus cuniculus (Rabbit) GN=EIF4A1 PE=1 SV=2		Typical	26	138	63	126.973	Typical	30	140	65	128.527	Typical	28	142	65	131.63	Typical	25	142	68	131.431	Typical	29	162	70	147.618	Typical	21	156	57	143.103	Typical	30	195	77	175.569	Typical	31	216	87	195.532	Typical	28	178	72	161.422
tr|G1SMZ5|G1SMZ5_RABIT	EIF3A	Eukaryotic translation initiation factor 3 subunit A OS=Oryctolagus cuniculus (Rabbit) GN=EIF3A PE=1 SV=2		Typical	47	106	106	106	Typical	35	79	79	79	Typical	34	78	78	78	Typical	33	83	83	83	Typical	37	89	89	89	Typical	30	76	76	76	Typical	35	80	80	80	Typical	30	67	67	67	Typical	29	58	58	58
tr|G1SQD1|G1SQD1_RABIT	EIF4G1	Eukaryotic translation initiation factor 4 gamma 1 OS=Oryctolagus cuniculus (Rabbit) GN=EIF4G1 PE=4 SV=2		Typical	33	81	66	80.7938	Typical	34	72	61	71.8591	Typical	31	75	64	74.8591	Typical	29	67	60	66.9038	Typical	30	75	67	74.89	Typical	24	56	48	55.89	Typical	32	88	78	87.8625	Typical	30	74	69	73.9313	Typical	26	62	61	61.9862
tr|G1SQV5|G1SQV5_RABIT	EIF3D	Eukaryotic translation initiation factor 3 subunit D OS=Oryctolagus cuniculus (Rabbit) GN=EIF3D PE=3 SV=1		Typical	19	80	80	80	Typical	18	70	70	70	Typical	16	69	69	69	Typical	18	64	64	64	Typical	18	75	75	75	Typical	15	69	69	69	Typical	17	71	71	71	Typical	15	55	55	55	Typical	12	42	42	42
tr|G1SN05|G1SN05_RABIT	EIF4A2	Uncharacterized protein OS=Oryctolagus cuniculus (Rabbit) GN=EIF4A2 PE=3 SV=1		Typical	18	65	20	30.57	Typical	19	69	22	33.0405	Typical	20	64	22	31.8686	Typical	16	62	19	29.0994	Typical	20	78	19	32.8572	Typical	14	72	20	32.2147	Typical	20	105	25	43.7847	Typical	22	111	27	46.7236	Typical	18	86	18	33.9703
sp|P10160|IF5A1_RABIT	EIF5A	Eukaryotic translation initiation factor 5A-1 OS=Oryctolagus cuniculus (Rabbit) GN=EIF5A PE=1 SV=2		Typical	14	60	26	58.7533	Typical	15	65	29	63.68	Typical	15	78	43	76.7167	Typical	14	71	35	69.68	Typical	14	72	32	70.5333	Typical	13	50	24	49.0467	Typical	13	74	31	72.4233	Typical	12	84	37	82.2767	Typical	13	74	32	72.46
sp|Q5IH81|EIF3I_RABIT	EIF3I	Eukaryotic translation initiation factor 3 subunit I OS=Oryctolagus cuniculus (Rabbit) GN=EIF3I PE=2 SV=1		Typical	13	57	57	57	Typical	14	48	48	48	Typical	12	46	46	46	Typical	11	40	40	40	Typical	12	37	37	37	Typical	9	39	39	39	Typical	9	26	26	26	Typical	10	25	25	25	Typical	10	19	19	19
tr|G1TAW7|G1TAW7_RABIT	EIF2A	Eukaryotic translation initiation factor 2 subunit 1 OS=Oryctolagus cuniculus (Rabbit) GN=EIF2A PE=4 SV=1		Typical	20	56	54	55.9951	Typical	19	45	42	44.9926	Typical	20	46	42	45.9902	Typical	16	50	45	49.9877	Typical	12	38	36	37.9951	Typical	16	42	41	41.9975	Typical	18	59	57	58.9951	Typical	18	53	51	52.9951	Typical	15	42	39	41.9926
tr|G1SUC8|G1SUC8_RABIT	EIF3E	Eukaryotic translation initiation factor 3 subunit E OS=Oryctolagus cuniculus (Rabbit) GN=EIF3E PE=1 SV=2		Typical	21	55	55	55	Typical	19	49	49	49	Typical	18	49	49	49	Typical	21	50	50	50	Typical	18	52	52	52	Typical	18	57	57	57	Typical	18	43	43	43	Typical	15	38	38	38	Typical	13	32	32	32
tr|G1SZ03|G1SZ03_RABIT	EIF3B	Eukaryotic translation initiation factor 3 subunit B OS=Oryctolagus cuniculus (Rabbit) GN=EIF3B PE=1 SV=1		Typical	21	52	52	52	Typical	17	40	40	40	Typical	20	49	49	49	Typical	15	34	34	34	Typical	15	45	45	45	Typical	8	21	21	21	Typical	13	29	29	29	Typical	13	31	31	31	Typical	13	26	26	26
tr|G1U971|G1U971_RABIT	EIF3C	Eukaryotic translation initiation factor 3 subunit C OS=Oryctolagus cuniculus (Rabbit) GN=EIF3C PE=1 SV=1		Typical	21	50	50	50	Typical	20	45	45	45	Typical	22	42	42	42	Typical	16	44	44	44	Typical	15	46	46	46	Typical	15	33	33	33	Typical	15	33	33	33	Typical	13	28	28	28	Typical	10	19	19	19
tr|G1SQ93|G1SQ93_RABIT	AGO2 EIF2C2	Protein argonaute-2 OS=Oryctolagus cuniculus (Rabbit) GN=AGO2 PE=3 SV=1		Typical	21	45	3	30.3	Typical	18	40	4	27.4	Typical	18	39	3	26.4	Typical	20	50	4	33.9	Typical	20	43	4	29.35	Typical	16	40	4	27.4	Typical	25	63	6	43.05	Typical	23	61	6	41.75	Typical	22	52	5	35.55
tr|U3KLT5|U3KLT5_RABIT	EIF5B	Uncharacterized protein OS=Oryctolagus cuniculus (Rabbit) GN=EIF5B PE=4 SV=1		Typical	14	45	45	45	Typical	14	34	34	34	Typical	18	51	51	51	Typical	16	36	36	36	Typical	14	36	36	36	Typical	13	26	26	26	Typical	13	31	31	31	Typical	16	31	31	31	Typical	12	30	30	30
sp|O77503|AGO2_RABIT	AGO2 EIF2C2	Protein argonaute-2 OS=Oryctolagus cuniculus (Rabbit) GN=AGO2 PE=1 SV=2		Typical	21	44	2	16.7	Typical	18	39	3	15.6	Typical	18	38	2	14.6	Typical	20	48	2	18.1	Typical	20	42	3	16.65	Typical	16	38	2	14.6	Typical	25	59	2	21.95	Typical	23	57	2	21.25	Typical	22	50	3	19.45
tr|G1T5H8|G1T5H8_RABIT	EIF4B	Uncharacterized protein OS=Oryctolagus cuniculus (Rabbit) GN=EIF4B PE=4 SV=2		Typical	15	43	43	43	Typical	17	55	55	55	Typical	16	54	54	54	Typical	18	54	54	54	Typical	17	56	56	56	Typical	15	52	52	52	Typical	20	83	83	83	Typical	22	85	85	85	Typical	20	74	74	74
tr|G1ST95|G1ST95_RABIT	EIF3H	Eukaryotic translation initiation factor 3 subunit H OS=Oryctolagus cuniculus (Rabbit) GN=EIF3H PE=1 SV=2		Typical	12	40	40	40	Typical	8	29	29	29	Typical	9	32	32	32	Typical	7	20	20	20	Typical	9	29	29	29	Typical	8	20	20	20	Typical	8	21	21	21	Typical	6	14	14	14	Typical	5	10	10	10
tr|G1SLW8|G1SLW8_RABIT	EIF3M	Eukaryotic translation initiation factor 3 subunit M OS=Oryctolagus cuniculus (Rabbit) GN=EIF3M PE=1 SV=2		Typical	14	38	38	38	Typical	13	35	35	35	Typical	13	33	33	33	Typical	11	23	23	23	Typical	12	35	35	35	Typical	14	31	31	31	Typical	9	17	17	17	Typical	9	16	16	16	Typical	6	8	8	8
tr|U3KMP9|U3KMP9_RABIT	EIF4A (Interpro)	Uncharacterized protein OS=Oryctolagus cuniculus (Rabbit) GN=LOC100341294 PE=3 SV=1		Subset	5	38	0	0.457417	Typical	8	37	1	1.4321	Typical	7	42	1	1.50129	Subset	6	39	0	0.470075	Typical	9	45	1	1.52452	Subset	5	56	0	0.682315	Typical	9	57	2	2.64606	Typical	10	65	2	2.74438	Typical	9	52	1	1.60723
tr|U3KNL5|U3KNL5_RABIT	EIF3F	Eukaryotic translation initiation factor 3 subunit F OS=Oryctolagus cuniculus (Rabbit) GN=EIF3F PE=1 SV=1		Typical	10	36	36	36	Typical	9	31	31	31	Typical	9	32	32	32	Typical	8	33	33	33	Typical	9	32	32	32	Typical	8	28	28	28	Typical	8	19	19	19	Typical	7	17	17	17	Typical	7	15	15	15
tr|G1T916|G1T916_RABIT	EIF5A	Eukaryotic translation initiation factor 5A OS=Oryctolagus cuniculus (Rabbit) GN=LOC100338341 PE=3 SV=1		Typical	10	35	1	2.24667	Typical	11	37	1	2.32	Subset	10	35	0	1.28333	Typical	10	37	1	2.32	Typical	10	41	1	2.46667	Subset	8	26	0	0.953333	Typical	10	46	3	4.57667	Typical	10	49	2	3.72333	Typical	10	44	2	3.54
tr|G1T3H5|G1T3H5_RABIT	EIF2B3	Uncharacterized protein OS=Oryctolagus cuniculus (Rabbit) GN=EIF2B3 PE=4 SV=1		Typical	12	33	33	33	Typical	17	49	49	49	Typical	10	28	28	28	Typical	9	31	31	31	Typical	9	37	37	37	Typical	8	34	34	34	Typical	8	23	23	23	Typical	5	19	19	19	Typical	5	11	11	11
tr|G1SJS2|G1SJS2_RABIT	EIF2B1	Uncharacterized protein OS=Oryctolagus cuniculus (Rabbit) GN=EIF2B1 PE=3 SV=1		Typical	10	26	26	26	Typical	12	35	35	35	Typical	8	14	14	14	Typical	6	10	10	10	Typical	6	14	14	14	Typical	7	12	12	12	Typical	4	6	6	6	Typical	2	2	2	2	Typical	1	1	1	1
tr|G1T2G4|G1T2G4_RABIT	EIF2S1	Eukaryotic translation initiation factor 2 subunit 1 OS=Oryctolagus cuniculus (Rabbit) GN=EIF2S1 PE=4 SV=1		Typical	13	23	23	23	Typical	11	22	22	22	Typical	10	24	24	24	Typical	7	14	14	14	Typical	8	16	16	16	Typical	6	10	10	10	Typical	7	13	13	13	Typical	7	13	13	13	Typical	7	16	16	16
tr|G1T5U2|G1T5U2_RABIT	EIF1A (InterPro)	Uncharacterized protein OS=Oryctolagus cuniculus (Rabbit) GN=LOC100345822 PE=3 SV=1		Typical	5	22	0	0	Typical	4	20	0	0	Typical	4	21	0	0	Typical	4	9	0	0	Typical	3	13	0	0	Typical	4	15	0	0	Typical	6	15	0	0	Typical	4	13	0	0	Typical	4	9	0	0
sp|P47823|EI2BE_RABIT	EIF2B5	Translation initiation factor eIF-2B subunit epsilon OS=Oryctolagus cuniculus (Rabbit) GN=EIF2B5 PE=1 SV=1		Typical	11	22	22	22	Typical	11	32	32	32	Typical	8	16	16	16	Typical	7	16	16	16	Typical	9	18	18	18	Typical	7	16	16	16	Typical	7	11	11	11	Typical	4	9	9	9	Typical	3	4	4	4
tr|G1SRA8|G1SRA8_RABIT	EIF2S3	Eukaryotic translation initiation factor 2 subunit 3 OS=Oryctolagus cuniculus (Rabbit) GN=EIF2S3 PE=4 SV=2		Typical	10	22	22	22	Typical	9	18	18	18	Typical	9	17	17	17	Typical	8	14	14	14	Typical	5	12	12	12	Typical	5	11	11	11	Typical	7	14	14	14	Typical	6	15	15	15	Typical	6	13	13	13
sp|P47814|IF1A_RABIT	EIF1A	Eukaryotic translation initiation factor 1A OS=Oryctolagus cuniculus (Rabbit) GN=EIF1A PE=1 SV=2		Typical	4	19	2	15.875	Typical	4	20	3	17.5	Typical	4	20	2	16.875	Subset	3	8	0	6.75	Typical	3	11	2	10.0625	Typical	4	14	3	11.5	Typical	5	16	5	14.75	Typical	3	14	4	12.75	Typical	4	9	1	7.75
tr|G1SYS4|G1SYS4_RABIT	EIF1A (InterPro)	Uncharacterized protein OS=Oryctolagus cuniculus (Rabbit) GN=EIF1AX PE=3 SV=1		Typical	5	19	4	12.125	Subset	3	11	0	5.5	Subset	3	13	0	6.125	Subset	3	5	0	2.25	Subset	2	7	0	4.9375	Typical	4	14	2	8.5	Typical	5	11	3	8.25	Subset	3	7	0	4.25	Typical	3	6	1	3.25
sp|P41035|IF2B_RABIT	EIF2S2	Eukaryotic translation initiation factor 2 subunit 2 OS=Oryctolagus cuniculus (Rabbit) GN=EIF2S2 PE=1 SV=1		Typical	12	19	19	19	Typical	9	12	12	12	Typical	9	12	12	12	Typical	5	8	8	8	Typical	7	15	15	15	Typical	3	6	6	6	Typical	7	18	18	18	Typical	7	14	14	14	Typical	4	6	6	6
tr|G1SED9|G1SED9_RABIT	EIF3L	Uncharacterized protein OS=Oryctolagus cuniculus (Rabbit) GN=EIF3L PE=1 SV=1		Typical	13	19	19	19	Typical	12	16	16	16	Typical	10	17	17	17	Typical	4	6	6	6	Typical	4	8	8	8	Typical	4	5	5	5	Typical	5	6	6	6	Typical	2	3	3	3	Typical	4	5	5	5
tr|G1SNT1|G1SNT1_RABIT	EIF3J	Uncharacterized protein OS=Oryctolagus cuniculus (Rabbit) GN=EIF3J PE=3 SV=1		Typical	10	18	18	18	Typical	5	12	12	12	Typical	6	11	11	11	Typical	7	13	13	13	Typical	10	19	19	19	Typical	6	15	15	15	Typical	9	16	16	16	Typical	7	13	13	13	Typical	7	13	13	13
tr|G1TE76|G1TE76_RABIT	EIF4H	Uncharacterized protein OS=Oryctolagus cuniculus (Rabbit) GN=EIF4H PE=4 SV=1		Typical	2	18	18	18	Typical	4	13	13	13	Typical	2	17	17	17	Typical	3	16	16	16	Typical	4	16	16	16	Typical	2	17	17	17	Typical	8	21	21	21	Typical	6	22	22	22	Typical	6	20	20	20
tr|G1TR97|G1TR97_RABIT	EIF4G3	Uncharacterized protein OS=Oryctolagus cuniculus (Rabbit) GN=EIF4G3 PE=4 SV=2		Typical	7	17	2	2.20619	Typical	6	11	1	1.13746	Typical	6	11	1	1.13746	Typical	6	9	2	2.09622	Typical	6	9	1	1.10997	Typical	6	9	1	1.10997	Subset	4	10	0	0.137457	Subset	3	5	0	0.0687285	Subset	1	1	0	0.0137457
tr|G1TGW1|G1TGW1_RABIT	EIF5	Uncharacterized protein OS=Oryctolagus cuniculus (Rabbit) GN=EIF5 PE=4 SV=1		Typical	10	17	15	16.9255	Typical	9	14	13	13.9627	Typical	8	17	17	17	Typical	7	17	17	17	Typical	9	22	21	21.9627	Typical	6	15	15	15	Typical	10	21	20	20.9627	Typical	9	20	19	19.9627	Typical	8	18	18	18
sp|P41111|EI2BD_RABIT	EIF2B4	Translation initiation factor eIF-2B subunit delta OS=Oryctolagus cuniculus (Rabbit) GN=EIF2B4 PE=2 SV=2		Typical	10	16	16	16	Typical	11	17	17	17	Typical	9	13	13	13	Typical	6	10	10	10	Typical	9	15	15	15	Typical	7	12	12	12	Typical	6	10	10	10	Typical	5	7	7	7	Typical	5	7	7	7
tr|G1T573|G1T573_RABIT	EIF4G2	Eukaryotic translation initiation factor 4 gamma 2 OS=Oryctolagus cuniculus (Rabbit) GN=EIF4G2 PE=4 SV=1		Typical	9	15	15	15	Typical	12	20	20	20	Typical	13	20	20	20	Typical	10	15	15	15	Typical	10	14	14	14	Typical	5	11	11	11	Typical	5	8	8	8	Typical	5	8	8	8	Typical	4	6	6	6
sp|P29338|IF4E_RABIT	EIF4E	Eukaryotic translation initiation factor 4E OS=Oryctolagus cuniculus (Rabbit) GN=EIF4E PE=1 SV=1		Typical	5	14	14	14	Typical	7	16	16	16	Typical	5	16	16	16	Typical	5	15	15	15	Typical	4	13	13	13	Typical	3	9	9	9	Typical	4	18	18	18	Typical	7	19	19	19	Typical	4	17	17	17
sp|Q28690|EI2BB_RABIT	EIF2B2	Translation initiation factor eIF-2B subunit beta OS=Oryctolagus cuniculus (Rabbit) GN=EIF2B2 PE=1 SV=1		Typical	4	9	9	9	Typical	8	16	16	16	Typical	4	6	6	6	Typical	6	8	8	8	Typical	4	9	9	9	Typical	3	6	6	6	Typical	2	2	2	2	Typical	1	1	1	1	Typical	1	1	1	1
tr|G1SSL4|G1SSL4_RABIT	EIF2AK2 eIF2aK2	Uncharacterized protein OS=Oryctolagus cuniculus (Rabbit) GN=EIF2AK2 PE=3 SV=1		Typical	5	7	7	7	Typical	4	6	6	6	Typical	4	5	5	5	Typical	11	17	17	17	Typical	7	10	10	10	Typical	3	4	4	4		0	0	0	0		0	0	0	0		0	0	0	0
sp|P0CL18|EIF2D_RABIT	EIF2D	Eukaryotic translation initiation factor 2D OS=Oryctolagus cuniculus (Rabbit) GN=EIF2D PE=1 SV=1		Typical	4	5	5	5	Typical	4	4	4	4	Typical	4	4	4	4		0	0	0	0	Typical	1	1	1	1		0	0	0	0		0	0	0	0		0	0	0	0		0	0	0	0
tr|G1T3L2|G1T3L2_RABIT	EIF3K	Eukaryotic translation initiation factor 3 subunit K OS=Oryctolagus cuniculus (Rabbit) GN=EIF3K PE=1 SV=1		Typical	1	2	2	2	Typical	1	3	3	3	Typical	2	4	4	4		0	0	0	0		0	0	0	0	Typical	1	2	2	2		0	0	0	0		0	0	0	0		0	0	0	0
tr|Q6EVH7|Q6EVH7_RABIT	eIF4GI	eIF4GI protein OS=Oryctolagus cuniculus (Rabbit) GN=eIF4GI PE=2 SV=1		Typical	1	2	2	2	Subset	1	1	0	0.00347222	Subset	1	1	0	0.00347222		0	0	0	0		0	0	0	0		0	0	0	0		0	0	0	0		0	0	0	0		0	0	0	0
tr|G1SLZ9|G1SLZ9_RABIT	EIF4E2	Uncharacterized protein OS=Oryctolagus cuniculus (Rabbit) GN=EIF4E2 PE=3 SV=1		Typical	1	1	1	1		0	0	0	0		0	0	0	0	Typical	1	1	1	1	Typical	1	2	2	2	Typical	1	1	1	1		0	0	0	0		0	0	0	0		0	0	0	0
tr|B7NZI5|B7NZI5_RABIT	EIF6 ITGB4BP	Eukaryotic translation initiation factor 6 OS=Oryctolagus cuniculus (Rabbit) GN=EIF6 PE=3 SV=1		Typical	1	1	1	1	Typical	1	1	1	1	Typical	1	1	1	1	Typical	2	2	2	2	Typical	2	3	3	3	Typical	1	1	1	1		0	0	0	0	Typical	1	1	1	1		0	0	0	0
tr|G1SDN3|G1SDN3_RABIT	EIF1	Uncharacterized protein OS=Oryctolagus cuniculus (Rabbit) GN=EIF1 PE=4 SV=2			0	0	0	0		0	0	0	0		0	0	0	0		0	0	0	0		0	0	0	0		0	0	0	0	Typical	1	1	1	1		0	0	0	0		0	0	0	0
sp|P01948|HBA_RABIT	HBB1/2	Hemoglobin subunit alpha-1/2 OS=Oryctolagus cuniculus (Rabbit) PE=1 SV=2		Typical	19	521	40	519.006	Typical	18	698	57	694.928	Typical	19	678	48	675.21	Typical	19	690	70	686.662	Typical	16	769	59	765.568	Typical	16	526	50	523.647	Typical	17	769	70	765.647	Typical	16	879	88	875.258	Typical	21	931	105	927.101
sp|P02057|HBB_RABIT	HBB1; HBB2	Hemoglobin subunit beta-1/2 OS=Oryctolagus cuniculus (Rabbit) GN=HBB1 PE=1 SV=2		Typical	22	521	369	520.095	Typical	25	728	521	726.742	Typical	24	644	472	642.956	Typical	23	736	536	734.892	Typical	23	728	504	726.668	Typical	23	709	529	707.822	Typical	21	800	547	798.469	Typical	22	935	667	933.366	Typical	22	1021	721	1019.12
tr|G8ZF33|G8ZF33_RABIT	HBA1	Alpha-globin 1 OS=Oryctolagus cuniculus (Rabbit) GN=HBA1 PE=3 SV=1		Typical	17	485	0	0	Typical	17	622	0	0	Typical	17	605	0	0	Typical	17	591	0	0	Typical	15	698	0	0	Typical	15	481	0	0	Typical	16	687	0	0	Typical	15	787	0	0	Typical	19	827	0	0
tr|G8ZF20|G8ZF20_RABIT	HBA1 HBA2	Alpha-globin 1 OS=Oryctolagus cuniculus (Rabbit) GN=HBA1 PE=3 SV=1		Typical	17	353	0	12.4882	Typical	18	509	2	15.5739	Typical	17	461	0	12.0066	Typical	18	543	0	15.6718	Typical	16	583	0	15.8077	Typical	16	411	0	18.0484	Typical	17	589	0	19.2161	Typical	16	659	0	19.4533	Typical	20	682	0	19.2488
tr|G1T9M9|G1T9M9_RABIT	HSPA8	Uncharacterized protein OS=Oryctolagus cuniculus (Rabbit) GN=HSPA8 PE=3 SV=1		Typical	36	316	225	313.521	Typical	37	306	216	303.821	Typical	37	318	216	315.604	Typical	40	342	230	339.597	Typical	34	338	236	335.865	Typical	35	361	253	358.393	Typical	32	345	244	342.899	Typical	36	337	232	335.072	Typical	36	286	189	284.115
sp|O19048|PCBP1_RABIT	PCBP1	Poly(rC)-binding protein 1 OS=Oryctolagus cuniculus (Rabbit) GN=PCBP1 PE=2 SV=1		Typical	30	292	160	272.223	Typical	26	236	133	220.568	Typical	29	266	146	248.021	Typical	24	237	147	223.516	Typical	24	250	156	235.919	Typical	26	293	169	274.422	Typical	24	190	114	178.616	Typical	25	177	110	166.964	Typical	24	144	85	135.16
sp|P68105|EF1A1_RABIT	EEF1A1	Elongation factor 1-alpha 1 OS=Oryctolagus cuniculus (Rabbit) GN=EEF1A1 PE=1 SV=1		Typical	23	239	239	239	Typical	26	253	253	253	Typical	23	286	286	286	Typical	25	265	265	265	Typical	23	314	314	314	Typical	22	243	243	243	Typical	25	257	257	257	Typical	24	228	228	228	Typical	21	174	174	174
sp|O19049|HNRPK_RABIT	HNRNPK HNRPK	Heterogeneous nuclear ribonucleoprotein K OS=Oryctolagus cuniculus (Rabbit) GN=HNRNPK PE=2 SV=1		Typical	29	188	188	188	Typical	29	190	190	190	Typical	28	189	189	189	Typical	28	197	197	197	Typical	26	211	211	211	Typical	25	195	195	195	Typical	27	202	202	202	Typical	28	192	192	192	Typical	23	157	157	157
tr|G1U2V6|G1U2V6_RABIT	HSP90AB1 HSPCB	Uncharacterized protein OS=Oryctolagus cuniculus (Rabbit) GN=PCBP2 PE=4 SV=1		Typical	17	167	27	54.2602	Typical	19	133	23	45.0147	Typical	19	161	33	58.4958	Typical	18	125	27	48.0846	Typical	19	124	23	43.6918	Typical	16	156	25	50.1025	Typical	17	108	23	43.0079	Typical	18	91	16	33.7031	Typical	15	80	14	29.545
tr|G8ZF31|G8ZF31_RABIT	HBA1	Alpha-globin 1 OS=Oryctolagus cuniculus (Rabbit) GN=HBA1 PE=3 SV=1		Typical	15	152	1	30.5058	Typical	15	221	1	32.4983	Subset	14	198	0	27.7838	Subset	15	247	0	36.6667	Subset	14	242	0	36.6246	Subset	14	197	0	43.3045	Typical	15	248	1	46.1371	Subset	14	265	0	45.2886	Typical	18	275	2	46.6501
sp|P29694|EF1G_RABIT	EEF1G	Elongation factor 1-gamma OS=Oryctolagus cuniculus (Rabbit) GN=EEF1G PE=2 SV=3		Typical	25	150	150	150	Typical	26	138	138	138	Typical	24	135	135	135	Typical	22	133	133	133	Typical	22	183	183	183	Typical	22	190	190	190	Typical	19	166	166	166	Typical	21	159	159	159	Typical	17	128	128	128
tr|G1SNY1|G1SNY1_RABIT	TPR (InterPro)	Uncharacterized protein OS=Oryctolagus cuniculus (Rabbit) GN=IFIT1B PE=4 SV=1		Typical	27	149	39	92.0969	Typical	24	134	33	82.0032	Typical	25	126	27	75.0013	Typical	23	137	31	83.2722	Typical	22	151	32	90.7631	Typical	24	122	26	72.6951	Typical	23	159	43	101.504	Typical	23	131	27	79.0128	Typical	22	113	19	65.6973
tr|G1SI41|G1SI41_RABIT	PCBP3	Uncharacterized protein OS=Oryctolagus cuniculus (Rabbit) GN=PCBP3 PE=4 SV=2		Subset	9	140	0	0.516782	Typical	11	111	1	1.41734	Subset	10	128	0	0.483332	Subset	10	98	0	0.399708	Subset	10	100	0	0.389466	Subset	9	131	0	0.475877	Typical	10	85	1	1.3765	Subset	10	74	0	0.332809	Typical	10	68	2	2.29469
tr|G1SLA0|G1SLA0_RABIT		Uncharacterized protein OS=Oryctolagus cuniculus (Rabbit) PE=4 SV=1		Typical	27	140	33	65.9265	Typical	23	127	28	58.6446	Typical	23	119	22	52.0044	Typical	20	124	20	52.7335	Typical	20	137	19	56.215	Typical	21	111	16	45.5037	Typical	18	127	14	50.3818	Typical	17	113	10	42.9016	Typical	18	107	15	44.1712
tr|G1SLM0|G1SLM0_RABIT	PABPC1	Polyadenylate-binding protein OS=Oryctolagus cuniculus (Rabbit) GN=PABPC1 PE=3 SV=1		Typical	32	122	59	108.25	Typical	30	107	48	93.75	Typical	30	115	54	101.75	Typical	33	137	64	121	Typical	35	155	73	137	Typical	30	144	65	126	Typical	25	108	50	95.25	Typical	28	120	59	106.25	Typical	30	111	59	99.5
tr|G1SJB4|G1SJB4_RABIT	RACK1	Uncharacterized protein OS=Oryctolagus cuniculus (Rabbit) GN=GNB2L1 PE=1 SV=1		Typical	26	114	114	114	Typical	27	122	122	122	Typical	26	114	114	114	Typical	26	152	152	152	Typical	28	169	169	169	Typical	26	141	141	141	Typical	22	113	113	113	Typical	21	105	105	105	Typical	22	110	110	110
tr|G1TBL6|G1TBL6_RABIT	CLTC	Clathrin heavy chain OS=Oryctolagus cuniculus (Rabbit) GN=CLTC PE=3 SV=2		Typical	40	109	109	109	Typical	44	111	111	111	Typical	46	123	123	123	Typical	32	76	76	76	Typical	28	78	78	78	Typical	18	58	58	58	Typical	36	82	82	82	Typical	36	96	96	96	Typical	31	84	84	84
tr|U3KNF6|U3KNF6_RABIT	IFIT3	Uncharacterized protein OS=Oryctolagus cuniculus (Rabbit) GN=IFIT3 PE=4 SV=1		Typical	22	105	105	105	Typical	21	108	108	108	Typical	23	111	111	111	Typical	22	108	108	108	Typical	21	123	123	123	Typical	22	97	97	97	Typical	22	122	122	122	Typical	21	108	108	108	Typical	19	102	102	102
tr|G1TI39|G1TI39_RABIT	RDX	Uncharacterized protein OS=Oryctolagus cuniculus (Rabbit) GN=RDX PE=4 SV=2		Typical	32	104	78	88.9689	Typical	24	71	54	61.1642	Typical	25	76	55	63.8641	Typical	27	85	65	73.4271	Typical	25	67	49	56.5772	Typical	20	74	54	62.4191	Typical	21	60	38	47.261	Typical	20	49	29	37.4191	Typical	21	49	28	36.8481
tr|Q28698|Q28698_RABIT		Deadenylyl-beta-globin OS=Oryctolagus cuniculus (Rabbit) PE=3 SV=1		Typical	5	102	13	13.8151	Typical	5	129	5	6.13558	Typical	5	114	11	11.9433	Typical	4	111	3	3.98904	Typical	4	134	3	4.19968	Subset	3	117	0	1.07146	Typical	4	155	4	5.38285	Typical	4	164	3	4.4744	Typical	4	189	3	4.70335
tr|G1SCP8|G1SCP8_RABIT	MSN	Uncharacterized protein OS=Oryctolagus cuniculus (Rabbit) GN=MSN PE=4 SV=1		Typical	34	96	70	84.6008	Typical	31	91	74	83.5364	Typical	28	84	63	74.7991	Typical	28	85	65	76.2174	Typical	29	88	70	80.0861	Typical	23	91	71	82.2067	Typical	26	82	60	72.3274	Typical	28	83	63	74.2067	Typical	30	84	63	74.7778
tr|G1TDI0|G1TDI0_RABIT	PA2G4	Uncharacterized protein OS=Oryctolagus cuniculus (Rabbit) GN=PA2G4 PE=4 SV=1		Typical	29	95	95	95	Typical	23	99	99	99	Typical	24	90	90	90	Typical	26	119	119	119	Typical	29	149	149	149	Typical	29	149	149	149	Typical	24	119	119	119	Typical	23	117	117	117	Typical	23	115	115	115
tr|G1TWP4|G1TWP4_RABIT	VARS	Uncharacterized protein OS=Oryctolagus cuniculus (Rabbit) GN=VARS PE=3 SV=1		Typical	31	93	93	93	Typical	35	119	119	119	Typical	36	98	98	98	Typical	35	100	100	100	Typical	37	105	105	105	Typical	29	95	95	95	Typical	34	95	95	95	Typical	32	93	93	93	Typical	34	80	80	80
sp|P19134|TRFE_RABIT	TF	Serotransferrin OS=Oryctolagus cuniculus (Rabbit) GN=TF PE=1 SV=4		Typical	29	89	74	88.9284	Typical	32	96	77	95.9085	Typical	31	95	74	94.8985	Typical	28	86	76	85.9517	Typical	25	68	58	67.9534	Typical	21	54	47	53.9667	Typical	29	101	91	100.953	Typical	23	62	52	61.9534	Typical	24	59	49	58.9534
tr|G1T1V9|G1T1V9_RABIT	HSPA2	Uncharacterized protein OS=Oryctolagus cuniculus (Rabbit) GN=HSPA2 PE=3 SV=1		Typical	12	87	1	1.24644	Typical	15	87	2	2.24438	Typical	13	97	1	1.27626	Subset	13	106	0	0.305642	Subset	11	97	0	0.279789	Typical	12	102	1	1.29053	Typical	11	96	1	1.27419	Subset	13	101	0	0.291975	Subset	11	92	0	0.265827
tr|G1U3X3|G1U3X3_RABIT		Uncharacterized protein OS=Oryctolagus cuniculus (Rabbit) GN=LOC100342826 PE=4 SV=1		Typical	18	86	20	43.9766	Typical	20	83	24	45.3522	Typical	21	85	27	47.9943	Typical	18	81	23	43.9943	Typical	16	91	27	50.0219	Typical	17	78	23	42.8013	Typical	19	103	45	66.1138	Typical	16	90	37	56.0856	Typical	16	77	27	45.1315
tr|G1SDN4|G1SDN4_RABIT	SYNCRIP	Uncharacterized protein OS=Oryctolagus cuniculus (Rabbit) GN=SYNCRIP PE=4 SV=1		Typical	20	81	62	80.2589	Typical	21	76	57	75.2589	Typical	23	76	60	75.3759	Typical	22	75	58	74.3369	Typical	19	85	65	84.2199	Typical	16	73	50	72.1028	Typical	22	94	72	93.1418	Typical	21	90	69	89.1809	Typical	21	70	49	69.1809
tr|G1TEW3|G1TEW3_RABIT	G3BP1 (InterPro)	Uncharacterized protein OS=Oryctolagus cuniculus (Rabbit) GN=LOC100353286 PE=4 SV=1		Typical	12	70	65	69.6164	Typical	12	78	72	77.5397	Typical	16	76	68	75.3863	Typical	15	85	80	84.6164	Typical	16	95	88	94.463	Typical	14	95	88	94.463	Typical	13	73	68	72.6164	Typical	15	82	76	81.5397	Typical	17	75	69	74.5397
tr|G1SDJ7|G1SDJ7_RABIT	PABPC4	Polyadenylate-binding protein OS=Oryctolagus cuniculus (Rabbit) GN=PABPC4 PE=3 SV=2		Typical	19	70	11	28.75	Typical	23	75	18	35.25	Typical	24	76	19	36.25	Typical	23	93	24	45	Typical	22	98	23	44	Typical	22	103	26	49	Typical	17	72	17	33.75	Typical	17	77	19	35.75	Typical	19	70	20	35.5
tr|G1TR75|G1TR75_RABIT		Uncharacterized protein OS=Oryctolagus cuniculus (Rabbit) GN=LOC100353915 PE=3 SV=1		Subset	7	64	0	1.6732	Subset	7	73	0	1.9085	Typical	8	76	2	3.93464	Typical	9	98	2	4.5098	Typical	9	100	3	5.53595	Subset	6	75	0	1.96078	Subset	7	54	0	1.41176	Typical	9	57	1	2.46405	Subset	8	55	0	1.43791
tr|G1SFK3|G1SFK3_RABIT	RPA1	Uncharacterized protein OS=Oryctolagus cuniculus (Rabbit) GN=RPA1 PE=4 SV=2		Typical	23	61	61	61	Typical	24	59	59	59	Typical	26	62	62	62	Typical	23	60	60	60	Typical	24	73	73	73	Typical	18	56	56	56	Typical	20	57	57	57	Typical	19	57	57	57	Typical	20	53	53	53
tr|G1TSH8|G1TSH8_RABIT	CSD (InterPro)	Nuclease-sensitive element-binding protein 1 OS=Oryctolagus cuniculus (Rabbit) GN=YBX1 PE=4 SV=1		Typical	9	58	4	35.2188	Typical	9	51	5	31.5938	Typical	10	54	4	32.9062	Typical	8	42	5	26.3906	Typical	8	49	7	31.2812	Typical	9	60	4	36.375	Typical	9	64	5	39.1094	Typical	9	56	2	33.2188	Typical	9	48	1	28.1719
sp|Q28618|YBOX1_RABIT	YBX1 NSEP1 YB1	Nuclease-sensitive element-binding protein 1 OS=Oryctolagus cuniculus (Rabbit) GN=YBX1 PE=1 SV=3		Typical	11	58	4	26.7812	Typical	9	48	2	21.4062	Typical	11	52	2	23.0938	Typical	8	38	1	16.6094	Typical	8	45	3	20.7188	Typical	9	59	3	26.625	Typical	11	65	6	30.8906	Typical	9	57	3	25.7812	Typical	9	50	3	22.8281
tr|G1TEY6|G1TEY6_RABIT	GTPBP1	Uncharacterized protein OS=Oryctolagus cuniculus (Rabbit) GN=GTPBP1 PE=4 SV=1		Typical	22	57	57	57	Typical	22	52	52	52	Typical	18	43	43	43	Typical	17	48	48	48	Typical	20	48	48	48	Typical	18	51	51	51	Typical	13	27	27	27	Typical	8	19	19	19	Typical	7	14	14	14
tr|G1TCW1|G1TCW1_RABIT	TFRC	Uncharacterized protein OS=Oryctolagus cuniculus (Rabbit) GN=TFRC PE=4 SV=2		Typical	24	55	55	55	Typical	23	63	63	63	Typical	28	68	68	68	Typical	29	83	83	83	Typical	26	68	68	68	Typical	20	56	56	56	Typical	28	79	79	79	Typical	25	69	69	69	Typical	22	52	52	52
tr|G1TGK9|G1TGK9_RABIT	DHX9	Uncharacterized protein OS=Oryctolagus cuniculus (Rabbit) GN=DHX9 PE=4 SV=1		Typical	34	54	54	54	Typical	27	49	49	49	Typical	28	48	48	48	Typical	25	52	52	52	Typical	25	68	68	68	Typical	24	63	63	63	Typical	11	20	20	20	Typical	10	23	23	23	Typical	11	17	17	17
tr|G1SS73|G1SS73_RABIT	DDX1	Uncharacterized protein OS=Oryctolagus cuniculus (Rabbit) GN=DDX1 PE=4 SV=2		Typical	18	53	53	53	Typical	17	41	41	41	Typical	13	41	41	41	Typical	12	42	42	42	Typical	14	44	44	44	Typical	12	36	36	36	Typical	15	53	53	53	Typical	16	48	48	48	Typical	15	36	36	36
tr|G1TPN3|G1TPN3_RABIT	HNRNPAB	Uncharacterized protein OS=Oryctolagus cuniculus (Rabbit) GN=HNRNPAB PE=4 SV=1		Typical	15	53	47	52.7358	Typical	14	47	43	46.8239	Typical	14	50	48	49.9119	Typical	15	52	49	51.8679	Typical	11	65	58	64.6918	Typical	14	50	45	49.7799	Typical	11	65	62	64.8679	Typical	12	60	57	59.8679	Typical	12	48	47	47.956
tr|G1U383|G1U383_RABIT	DHX29	Uncharacterized protein OS=Oryctolagus cuniculus (Rabbit) GN=DHX29 PE=4 SV=1		Typical	31	52	51	52	Typical	27	50	50	50	Typical	28	51	51	51	Typical	20	29	29	29	Typical	18	30	30	30	Typical	14	27	27	27	Typical	14	22	22	22	Typical	12	15	15	15	Typical	8	10	10	10
tr|G1SL02|G1SL02_RABIT	AP2B1	AP complex subunit beta OS=Oryctolagus cuniculus (Rabbit) GN=AP2B1 PE=3 SV=1		Typical	14	51	50	50.9877	Typical	15	54	52	53.9754	Typical	16	63	62	62.9877	Typical	14	56	54	55.9754	Typical	13	60	59	59.9877	Typical	11	43	43	43	Typical	13	52	51	51.9877	Typical	12	60	60	60	Typical	12	51	51	51
tr|G1SQJ2|G1SQJ2_RABIT	FOCAD	Uncharacterized protein OS=Oryctolagus cuniculus (Rabbit) GN=FOCAD PE=4 SV=2		Typical	29	46	46	46	Typical	22	37	37	37	Typical	20	35	35	35	Typical	25	43	43	43	Typical	29	54	54	54	Typical	14	29	29	29	Typical	11	19	19	19	Typical	14	20	20	20	Typical	17	24	24	24
tr|G1T9Y7|G1T9Y7_RABIT	TRIM10	Uncharacterized protein OS=Oryctolagus cuniculus (Rabbit) GN=TRIM10 PE=4 SV=2		Typical	15	46	46	46	Typical	15	43	43	43	Typical	13	36	36	36	Typical	12	35	35	35	Typical	11	33	33	33	Typical	10	31	31	31	Typical	14	36	36	36	Typical	12	29	29	29	Typical	12	28	28	28
tr|G1T6B3|G1T6B3_RABIT	STRAP	Uncharacterized protein OS=Oryctolagus cuniculus (Rabbit) GN=STRAP PE=4 SV=2		Typical	15	44	44	44	Typical	14	43	43	43	Typical	15	50	50	50	Typical	12	43	43	43	Typical	14	42	42	42	Typical	13	43	43	43	Typical	12	47	47	47	Typical	11	44	44	44	Typical	11	39	39	39
tr|G1T336|G1T336_RABIT	DDX3X	Uncharacterized protein OS=Oryctolagus cuniculus (Rabbit) GN=DDX3X PE=3 SV=2		Typical	20	43	41	42.9763	Typical	23	56	53	55.9645	Typical	21	52	50	51.9763	Typical	19	56	52	55.9526	Typical	21	63	60	62.9645	Typical	17	44	43	43.9881	Typical	20	44	42	43.9763	Typical	20	48	44	47.9526	Typical	21	34	32	33.9763
tr|G1SUX8|G1SUX8_RABIT	HSP70 (Interpro)	Uncharacterized protein OS=Oryctolagus cuniculus (Rabbit) GN=LOC100354435 PE=3 SV=1		Typical	14	43	14	15.7862	Typical	15	37	12	13.5388	Typical	12	40	12	13.7245	Typical	13	40	14	15.6008	Typical	13	34	12	13.3502	Typical	9	38	10	11.7218	Typical	13	41	20	21.2856	Typical	14	43	22	23.2882	Typical	13	39	19	20.2265
sp|P12530|LOX15_RABIT	ALOX15	Arachidonate 15-lipoxygenase OS=Oryctolagus cuniculus (Rabbit) GN=ALOX15 PE=1 SV=3		Typical	20	42	42	42	Typical	24	77	77	77	Typical	22	51	51	51	Typical	19	56	56	56	Typical	24	80	80	80	Typical	15	52	52	52	Typical	22	81	81	81	Typical	21	56	56	56	Typical	24	83	83	83
tr|G1SZK4|G1SZK4_RABIT	PDAP1	Uncharacterized protein OS=Oryctolagus cuniculus (Rabbit) GN=PDAP1 PE=4 SV=1		Typical	10	42	42	42	Typical	10	36	36	36	Typical	11	38	38	38	Typical	11	43	43	43	Typical	8	25	25	25	Typical	10	44	44	44	Typical	8	34	34	34	Typical	8	22	22	22	Typical	8	26	26	26
tr|G1TVT1|G1TVT1_RABIT	ADD1	Uncharacterized protein OS=Oryctolagus cuniculus (Rabbit) GN=ADD1 PE=4 SV=1		Typical	16	40	37	38.5432	Typical	17	31	28	29.5432	Typical	18	29	27	28.0288	Typical	12	25	25	25	Typical	13	28	28	28	Typical	14	32	29	30.5432	Typical	13	27	24	25.5432	Typical	11	20	17	18.5432	Typical	11	19	17	18.0288
tr|G1T1J9|G1T1J9_RABIT	BMP2K	Uncharacterized protein OS=Oryctolagus cuniculus (Rabbit) GN=BMP2K PE=4 SV=2		Typical	17	38	38	38	Typical	16	40	40	40	Typical	16	37	37	37	Typical	18	34	34	34	Typical	16	36	36	36	Typical	13	36	36	36	Typical	14	37	37	37	Typical	14	31	31	31	Typical	14	25	25	25
tr|G1TUU3|G1TUU3_RABIT	ZNFX1	Uncharacterized protein OS=Oryctolagus cuniculus (Rabbit) GN=ZNFX1 PE=4 SV=1		Typical	28	38	38	38	Typical	25	36	36	36	Typical	19	25	25	25	Typical	17	21	21	21	Typical	11	15	15	15	Typical	8	10	10	10	Typical	8	8	8	8	Typical	9	9	9	9	Typical	5	6	6	6
sp|P53787|EF1D_RABIT	EEF1D	Elongation factor 1-delta OS=Oryctolagus cuniculus (Rabbit) GN=EEF1D PE=2 SV=1		Typical	8	37	37	37	Typical	8	39	39	39	Typical	8	35	35	35	Typical	8	43	43	43	Typical	9	45	44	44.6661	Typical	8	42	42	42	Typical	11	51	50	50.6661	Typical	10	53	50	51.9983	Typical	9	44	43	43.6661
tr|G1U8F0|G1U8F0_RABIT	AP2A1	Uncharacterized protein OS=Oryctolagus cuniculus (Rabbit) GN=AP2A1 PE=4 SV=1		Typical	14	36	36	36	Typical	13	30	30	30	Typical	15	29	29	29	Typical	11	30	30	30	Typical	11	23	23	23	Typical	12	29	29	29	Typical	11	24	24	24	Typical	11	26	26	26	Typical	12	24	24	24
tr|G1SLH7|G1SLH7_RABIT	EPS15	Uncharacterized protein OS=Oryctolagus cuniculus (Rabbit) GN=EPS15 PE=4 SV=1		Typical	20	36	36	36	Typical	16	34	34	34	Typical	18	37	37	37	Typical	18	40	40	40	Typical	18	35	35	35	Typical	14	30	30	30	Typical	15	35	35	35	Typical	14	31	31	31	Typical	17	30	30	30
tr|G1T7F5|G1T7F5_RABIT	ADD2	Uncharacterized protein OS=Oryctolagus cuniculus (Rabbit) GN=ADD2 PE=4 SV=1		Typical	17	35	32	33.4568	Typical	16	31	28	29.4568	Typical	17	37	35	35.9712	Typical	14	34	34	34	Typical	13	24	24	24	Typical	11	23	20	21.4568	Typical	11	19	16	17.4568	Typical	10	17	14	15.4568	Typical	10	18	16	16.9712
tr|G1U797|G1U797_RABIT	FXR1	Uncharacterized protein OS=Oryctolagus cuniculus (Rabbit) GN=FXR1 PE=4 SV=2		Typical	13	35	27	30.6967	Typical	14	31	26	28.342	Typical	15	30	26	27.8483	Typical	11	22	20	20.9873	Typical	11	23	19	20.7221	Typical	13	33	26	29.203	Typical	13	29	25	26.7221	Typical	10	20	16	17.7221	Typical	8	12	9	10.2285
tr|G1TI26|G1TI26_RABIT	LOC100351336	Uncharacterized protein OS=Oryctolagus cuniculus (Rabbit) GN=LOC100351336 PE=4 SV=1		Sameset	8	35	35	35	Sameset	11	48	48	48	Sameset	9	39	39	39	Typical	12	62	62	62	Typical	12	68	68	68	Sameset	8	50	50	50	Sameset	9	41	41	41	Sameset	9	47	47	47	Sameset	9	48	48	48
tr|G1SZ72|G1SZ72_RABIT	FXR2	Uncharacterized protein OS=Oryctolagus cuniculus (Rabbit) GN=FXR2 PE=4 SV=2		Typical	10	34	26	29.792	Typical	11	33	28	30.4023	Typical	10	31	27	28.896	Typical	7	22	20	21.0127	Typical	8	23	19	20.7665	Typical	8	29	22	25.2856	Typical	11	25	21	22.7665	Typical	10	26	22	23.7665	Typical	7	17	14	15.2601
sp|P34826|EF1B_RABIT	EEF1B EF1B	Elongation factor 1-beta OS=Oryctolagus cuniculus (Rabbit) GN=EEF1B PE=1 SV=2		Typical	8	32	32	32	Typical	6	18	18	18	Typical	7	22	22	22	Typical	6	19	19	19	Typical	8	19	18	18.3339	Typical	5	24	24	24	Typical	9	29	28	28.3339	Typical	6	20	17	18.0017	Typical	5	15	14	14.3339
tr|G1TSG6|G1TSG6_RABIT	DDX20	Uncharacterized protein OS=Oryctolagus cuniculus (Rabbit) GN=DDX20 PE=3 SV=1		Typical	10	31	31	31	Typical	7	21	21	21	Typical	8	21	21	21	Typical	9	23	23	23	Typical	8	17	17	17	Typical	7	20	20	20	Typical	11	29	29	29	Typical	7	19	19	19	Typical	5	11	11	11
tr|G1SG72|G1SG72_RABIT	ABCE1	Uncharacterized protein OS=Oryctolagus cuniculus (Rabbit) GN=ABCE1 PE=1 SV=1		Typical	15	29	29	29	Typical	13	24	24	24	Typical	12	19	19	19	Typical	9	15	15	15	Typical	10	21	21	21	Typical	6	11	11	11	Typical	11	15	15	15	Typical	5	8	8	8	Typical	7	8	8	8
tr|G1SIW1|G1SIW1_RABIT	DHX15	Uncharacterized protein OS=Oryctolagus cuniculus (Rabbit) GN=DHX15 PE=4 SV=1		Typical	15	29	29	29	Typical	16	38	38	38	Typical	15	38	38	38	Typical	12	36	36	36	Typical	11	28	28	28	Typical	12	29	29	29	Typical	14	42	42	42	Typical	15	51	51	51	Typical	15	48	48	48
tr|G1SW77|G1SW77_RABIT	SERBP1	Uncharacterized protein OS=Oryctolagus cuniculus (Rabbit) GN=SERBP1 PE=4 SV=1		Typical	8	29	29	29	Typical	7	30	30	30	Typical	9	40	40	40	Typical	10	46	46	46	Typical	12	47	47	47	Typical	10	28	28	28	Typical	9	34	34	34	Typical	9	32	32	32	Typical	9	35	35	35
tr|G1T0N5|G1T0N5_RABIT	PURA	Uncharacterized protein OS=Oryctolagus cuniculus (Rabbit) GN=PURA PE=4 SV=1		Typical	9	28	19	25.3	Typical	10	23	21	22.4	Typical	9	22	20	21.4	Typical	7	18	16	17.4	Typical	8	22	22	22	Typical	9	23	20	22.1	Typical	8	15	15	15	Typical	7	12	12	12	Typical	7	10	9	9.7
sp|Q8HZQ5|EZRI_RABIT	EZR VIL2	Ezrin OS=Oryctolagus cuniculus (Rabbit) GN=EZR PE=1 SV=3		Typical	7	27	4	4.43031	Typical	6	19	3	3.29935	Typical	7	21	3	3.33676	Typical	7	22	3	3.35547	Subset	5	18	0	0.336763	Typical	5	24	4	4.37418	Subset	6	22	0	0.4116	Typical	7	22	2	2.37418	Typical	8	21	1	1.37418
tr|G1SRZ8|G1SRZ8_RABIT	CNOT1	Uncharacterized protein OS=Oryctolagus cuniculus (Rabbit) GN=CNOT1 PE=4 SV=1		Typical	16	26	26	26	Typical	12	17	17	17	Typical	13	23	23	23	Typical	16	24	24	24	Typical	9	16	16	16	Typical	13	21	21	21	Typical	14	21	21	21	Typical	11	16	16	16	Typical	9	11	11	11
tr|G1U0X0|G1U0X0_RABIT	DTX3L	Uncharacterized protein OS=Oryctolagus cuniculus (Rabbit) GN=DTX3L PE=4 SV=2		Typical	11	26	26	26	Typical	12	20	20	20	Typical	12	24	24	24	Typical	11	22	22	22	Typical	10	23	23	23	Typical	11	15	15	15	Typical	8	21	21	21	Typical	4	10	10	10	Typical	5	7	7	7
tr|G1T7S6|G1T7S6_RABIT	FMR1	Uncharacterized protein OS=Oryctolagus cuniculus (Rabbit) GN=FMR1 PE=4 SV=1		Typical	10	25	23	23.5114	Typical	9	23	22	22.2557	Typical	9	20	19	19.2557	Typical	5	15	15	15	Typical	7	22	20	20.5114	Typical	6	18	16	16.5114	Typical	5	11	9	9.51136	Typical	4	11	9	9.51136	Typical	3	4	2	2.51136
tr|G1U7L4|G1U7L4_RABIT	HSPA5	Uncharacterized protein OS=Oryctolagus cuniculus (Rabbit) GN=HSPA5 PE=3 SV=1		Typical	9	25	16	16.4461	Typical	8	19	11	11.3955	Typical	8	19	11	11.3955	Typical	8	21	11	11.4966	Typical	8	25	15	15.4936	Typical	8	23	11	11.5948	Typical	9	26	15	15.5412	Typical	7	17	10	10.342	Typical	9	17	9	9.39254
tr|G1TKC4|G1TKC4_RABIT	KARS	Lysine--tRNA ligase OS=Oryctolagus cuniculus (Rabbit) GN=KARS PE=3 SV=2		Typical	14	25	25	25	Typical	14	27	27	27	Typical	13	26	26	26	Typical	14	31	31	31	Typical	12	24	24	24	Typical	9	22	22	22	Typical	13	36	36	36	Typical	14	31	31	31	Typical	14	33	33	33
tr|G1T6W7|G1T6W7_RABIT	CAT	Catalase OS=Oryctolagus cuniculus (Rabbit) GN=CAT PE=3 SV=2		Typical	12	24	22	23.9018	Typical	15	39	36	38.8528	Typical	13	26	23	25.8528	Typical	16	32	28	31.8037	Typical	14	35	33	34.9018	Typical	11	27	25	26.9018	Typical	16	39	33	38.7055	Typical	20	57	50	56.6564	Typical	24	71	60	70.4601
tr|G1SJ37|G1SJ37_RABIT	GAPVD1	Uncharacterized protein OS=Oryctolagus cuniculus (Rabbit) GN=GAPVD1 PE=4 SV=2		Typical	13	24	24	24	Typical	11	25	25	25	Typical	14	29	29	29	Typical	8	20	20	20	Typical	9	20	20	20	Typical	7	16	16	16	Typical	8	15	15	15	Typical	6	13	13	13	Typical	6	13	13	13
tr|G1SN68|G1SN68_RABIT	QARS	Uncharacterized protein OS=Oryctolagus cuniculus (Rabbit) GN=QARS PE=3 SV=1		Typical	16	24	24	24	Typical	11	15	15	15	Typical	8	11	11	11	Typical	10	15	15	15	Typical	10	12	12	12	Typical	6	8	8	8	Typical	20	30	30	30	Typical	15	26	26	26	Typical	9	13	13	13
tr|G1SUU7|G1SUU7_RABIT	RTCB	tRNA-splicing ligase RtcB homolog OS=Oryctolagus cuniculus (Rabbit) GN=RTCB PE=3 SV=2		Typical	9	24	24	24	Typical	9	24	24	24	Typical	9	22	22	22	Typical	8	21	21	21	Typical	8	19	19	19	Typical	6	16	16	16	Typical	8	19	19	19	Typical	8	16	16	16	Typical	7	13	13	13
tr|G1SCP7|G1SCP7_RABIT	IQGAP1	Uncharacterized protein OS=Oryctolagus cuniculus (Rabbit) GN=IQGAP1 PE=4 SV=1		Typical	14	24	24	24	Typical	14	19	19	19	Typical	11	17	17	17	Typical	9	12	12	12	Typical	5	7	7	7	Typical	5	10	10	10	Typical	7	8	8	8	Typical	7	9	9	9	Typical	7	8	8	8
tr|G1T2C3|G1T2C3_RABIT	CSDE1	Uncharacterized protein OS=Oryctolagus cuniculus (Rabbit) GN=CSDE1 PE=4 SV=2		Typical	12	23	23	23	Typical	11	21	21	21	Typical	10	19	19	19	Typical	11	20	20	20	Typical	8	12	12	12	Typical	8	13	13	13	Typical	10	16	16	16	Typical	6	11	11	11	Typical	6	13	13	13
tr|G1TB40|G1TB40_RABIT	PCBP2	Uncharacterized protein OS=Oryctolagus cuniculus (Rabbit) GN=LOC100347550 PE=4 SV=1		Typical	7	23	23	23	Typical	7	23	23	23	Typical	7	22	22	22	Typical	7	23	23	23	Typical	6	25	25	25	Typical	3	12	12	12	Typical	9	34	34	34	Typical	8	32	32	32	Typical	7	25	25	25
tr|G1SXG6|G1SXG6_RABIT	S100A8	Protein S100 OS=Oryctolagus cuniculus (Rabbit) GN=S100A8 PE=3 SV=1		Typical	6	23	23	23	Typical	6	19	19	19	Typical	7	22	22	22	Typical	5	16	16	16	Typical	6	17	17	17	Typical	5	17	17	17	Typical	3	12	12	12	Typical	3	6	6	6	Typical	2	3	3	3
tr|G1SKE2|G1SKE2_RABIT	TIAL1	Uncharacterized protein OS=Oryctolagus cuniculus (Rabbit) GN=TIAL1 PE=4 SV=1		Typical	7	23	16	21.2797	Typical	7	21	10	18.2966	Typical	8	20	13	18.2797	Typical	6	14	8	12.5254	Typical	7	14	10	13.0169	Typical	4	13	5	11.0339	Typical	7	18	10	16.0339	Typical	7	16	11	14.7712	Typical	6	10	6	9.01695
tr|G1SWD9|G1SWD9_RABIT	CARS	Uncharacterized protein OS=Oryctolagus cuniculus (Rabbit) GN=CARS PE=4 SV=1		Typical	12	22	22	22	Typical	13	26	26	26	Typical	9	21	21	21	Typical	10	20	20	20	Typical	8	19	19	19	Typical	5	14	14	14	Typical	7	17	17	17	Typical	6	13	13	13	Typical	6	12	12	12
tr|G1SRH9|G1SRH9_RABIT	HNRNPR	Uncharacterized protein OS=Oryctolagus cuniculus (Rabbit) GN=HNRNPR PE=4 SV=1		Typical	9	22	3	3.74113	Typical	8	21	2	2.74113	Typical	10	20	4	4.62411	Typical	7	19	2	2.66312	Typical	6	21	1	1.78014	Typical	7	25	2	2.89716	Typical	9	26	4	4.85816	Typical	7	23	2	2.81915	Typical	8	23	2	2.81915
sp|P30946|HS90A_RABIT	HSP90AA1 HSPCA	Heat shock protein HSP 90-alpha OS=Oryctolagus cuniculus (Rabbit) GN=HSP90AA1 PE=1 SV=2		Typical	11	21	13	20.4971	Typical	14	23	18	22.4971	Typical	12	20	14	19.4971	Typical	10	17	13	16.6229	Typical	13	28	19	26.9943	Typical	7	18	8	17.2457	Typical	14	23	17	22.3714	Typical	14	31	24	30.3714	Typical	15	33	27	32.4971
sp|P43348|TCTP_RABIT	TPT1	Translationally-controlled tumor protein OS=Oryctolagus cuniculus (Rabbit) GN=TPT1 PE=2 SV=2		Typical	6	21	21	21	Typical	6	20	20	20	Typical	7	24	24	24	Typical	4	21	21	21	Typical	3	20	20	20	Typical	3	17	17	17	Typical	3	15	15	15	Typical	4	17	17	17	Typical	4	13	13	13
tr|G1TBH2|G1TBH2_RABIT		60S ribosomal protein L36 OS=Oryctolagus cuniculus (Rabbit) GN=LOC100351893 PE=3 SV=1		Typical	7	21	21	21	Typical	8	28	28	28	Typical	7	26	26	26	Typical	9	38	38	38	Typical	7	30	30	30	Typical	8	44	44	44	Typical	6	24	24	24	Typical	6	24	24	24	Typical	7	23	23	23
tr|G1T8K2|G1T8K2_RABIT	PACSIN2	Uncharacterized protein OS=Oryctolagus cuniculus (Rabbit) GN=PACSIN2 PE=4 SV=1		Typical	5	20	20	20	Typical	5	18	18	18	Typical	5	21	21	21	Typical	5	24	24	24	Typical	5	30	30	30	Typical	4	23	23	23	Typical	4	34	34	34	Typical	5	35	35	35	Typical	5	28	28	28
tr|G1SQZ4|G1SQZ4_RABIT	RUVBL2	Uncharacterized protein OS=Oryctolagus cuniculus (Rabbit) GN=RUVBL2 PE=4 SV=2		Typical	12	19	19	19	Typical	13	21	21	21	Typical	11	17	17	17	Typical	11	16	16	16	Typical	10	13	13	13	Typical	10	17	17	17	Typical	11	19	19	19	Typical	7	16	16	16	Typical	10	15	15	15
tr|G1U9S2|G1U9S2_RABIT	ALB	Serum albumin OS=Oryctolagus cuniculus (Rabbit) GN=ALB PE=1 SV=1		Typical	10	18	11	11.5414	Sameset	7	20	11	11.696	Sameset	7	18	10	10.6187	Sameset	8	24	13	13.8507	Sameset	8	16	12	12.3093	Typical	5	8	7	7.07734	Sameset	12	27	22	25.1547	Typical	10	23	18	18.3867	Sameset	8	15	11	11.3093
tr|G1TA15|G1TA15_RABIT	LARS	Uncharacterized protein OS=Oryctolagus cuniculus (Rabbit) GN=LARS PE=3 SV=2		Typical	12	18	18	18	Typical	14	21	21	21	Typical	10	14	14	14	Typical	10	18	18	18	Typical	9	13	13	13	Typical	7	9	9	9	Typical	13	21	21	21	Typical	12	23	23	23	Typical	13	17	17	17
tr|G1U6X4|G1U6X4_RABIT	METAP2	Methionine aminopeptidase 2 OS=Oryctolagus cuniculus (Rabbit) GN=METAP2 PE=3 SV=1		Typical	8	18	18	18	Typical	7	12	12	12	Typical	9	14	14	14	Typical	6	15	15	15	Typical	7	14	14	14	Typical	6	9	9	9	Typical	9	17	17	17	Typical	6	12	12	12	Typical	6	13	13	13
tr|G1U6F4|G1U6F4_RABIT	PURB	Uncharacterized protein OS=Oryctolagus cuniculus (Rabbit) GN=PURB PE=4 SV=1		Typical	7	18	9	11.7	Typical	5	8	6	6.6	Typical	9	13	11	11.6	Typical	7	11	9	9.6	Typical	4	7	7	7	Typical	5	10	7	7.9	Typical	4	7	7	7	Typical	4	5	5	5	Typical	5	6	5	5.3
tr|G1SYV9|G1SYV9_RABIT	TLN1	Uncharacterized protein OS=Oryctolagus cuniculus (Rabbit) GN=TLN1 PE=4 SV=1		Typical	12	18	18	18	Typical	12	16	16	16	Typical	8	10	10	10	Typical	4	8	8	8	Typical	6	13	13	13	Typical	8	11	10	10.8195	Typical	6	13	13	13	Typical	7	11	11	11	Typical	6	10	10	10
tr|G1SIV3|G1SIV3_RABIT	FECH	Ferrochelatase OS=Oryctolagus cuniculus (Rabbit) GN=FECH PE=3 SV=2		Typical	9	17	17	17	Typical	7	12	12	12	Typical	6	12	12	12	Typical	5	10	10	10	Typical	4	8	8	8	Typical	5	13	13	13	Typical	3	4	4	4	Typical	3	4	4	4	Typical	2	2	2	2
tr|G1SDC7|G1SDC7_RABIT	RPA3	Uncharacterized protein OS=Oryctolagus cuniculus (Rabbit) GN=RPA3 PE=4 SV=1		Typical	7	17	17	17	Typical	5	18	18	18	Typical	6	18	18	18	Typical	5	22	22	22	Typical	5	20	20	20	Typical	5	17	17	17	Typical	5	21	21	21	Typical	5	20	20	20	Typical	4	21	21	21
tr|G1TQX1|G1TQX1_RABIT	SRP14	Uncharacterized protein OS=Oryctolagus cuniculus (Rabbit) GN=SRP14 PE=4 SV=1		Typical	4	17	17	17	Typical	4	15	15	15	Typical	5	15	15	15	Typical	5	19	19	19	Typical	4	13	13	13	Typical	4	15	15	15	Typical	5	19	19	19	Typical	4	12	12	12	Typical	5	11	11	11
tr|G1SIT9|G1SIT9_RABIT	YWHAB	Uncharacterized protein OS=Oryctolagus cuniculus (Rabbit) GN=YWHAB PE=3 SV=1		Typical	9	17	7	13.6955	Typical	7	15	9	12.2752	Typical	8	14	6	10.5856	Typical	7	14	10	11.86	Typical	7	18	10	14.0013	Typical	8	18	8	14.2104	Typical	8	18	9	13.9652	Typical	8	15	8	11.4452	Typical	9	18	9	13.8604
tr|G1TCS8|G1TCS8_RABIT	RAB1A	Uncharacterized protein OS=Oryctolagus cuniculus (Rabbit) GN=RAB1A PE=3 SV=1		Typical	12	17	11	14.932	Typical	5	10	3	7.8536	Typical	8	11	7	9.88758	Typical	6	11	5	8.93203	Typical	5	11	4	8.8536	Typical	6	7	6	6.52222	Typical	5	13	5	10.7752	Typical	5	13	4	10.6967	Typical	4	10	2	7.77516
tr|Q5UBU2|Q5UBU2_RABIT		Ribosomal protein L18 OS=Oryctolagus cuniculus (Rabbit) PE=2 SV=1		Typical	5	17	1	2.65161	Typical	6	22	2	4.06452	Typical	6	21	1	3.06452	Typical	6	24	2	4.27097	Typical	6	27	2	4.58064	Typical	6	21	2	3.96129	Typical	5	21	2	3.96129	Typical	5	21	2	3.96129	Typical	6	21	2	3.96129
tr|G1U9I8|G1U9I8_RABIT	KRT1	Uncharacterized protein OS=Oryctolagus cuniculus (Rabbit) GN=KRT1 PE=3 SV=2		Typical	6	16	0	0	Subset	4	8	0	0	Subset	5	10	0	0	Typical	7	53	0	0	Subset	2	9	0	0	Subset	3	8	0	0	Typical	6	17	0	0	Typical	3	8	0	0	Typical	11	43	0	0
tr|G1SFS8|G1SFS8_RABIT	SND1	Uncharacterized protein OS=Oryctolagus cuniculus (Rabbit) GN=SND1 PE=4 SV=2		Typical	9	16	16	16	Typical	10	18	18	18	Typical	13	22	22	22	Typical	11	22	22	22	Typical	9	20	20	20	Typical	9	15	15	15	Typical	19	43	43	43	Typical	13	33	33	33	Typical	13	32	32	32
tr|G1SZZ2|G1SZZ2_RABIT	SRP9	Signal recognition particle 9 kDa protein OS=Oryctolagus cuniculus (Rabbit) GN=SRP9 PE=3 SV=1		Typical	6	16	16	16	Typical	7	14	14	14	Typical	7	21	21	21	Typical	6	17	17	17	Typical	4	13	13	13	Typical	5	16	16	16	Typical	4	15	15	15	Typical	4	12	12	12	Typical	4	10	10	10
tr|G1TEW4|G1TEW4_RABIT	USP9X	Uncharacterized protein OS=Oryctolagus cuniculus (Rabbit) GN=USP9X PE=4 SV=1		Typical	14	16	16	16	Typical	13	18	18	18	Typical	10	15	15	15	Typical	8	9	9	9	Typical	8	12	12	12	Typical	3	5	5	5	Typical	6	9	9	9	Typical	4	7	7	7	Typical	6	6	6	6
tr|B7NZM8|B7NZM8_RABIT	YWHAH	Tyrosine 3-monooxygenase/tryptophan 5-monooxygenase activation protein, eta polypeptide (Predicted) OS=Oryctolagus cuniculus (Rabbit) GN=YWHAH PE=3 SV=1		Typical	6	16	15	15.264	Typical	11	26	17	23.1861	Typical	10	19	12	16.5241	Typical	10	23	16	20.6829	Typical	8	25	16	21.7779	Typical	8	18	12	15.7725	Typical	6	15	7	11.9469	Typical	7	18	10	14.9469	Typical	8	19	13	16.2849
tr|G1T2I4|G1T2I4_RABIT	EPRS	Uncharacterized protein OS=Oryctolagus cuniculus (Rabbit) GN=EPRS PE=3 SV=1		Typical	10	15	15	15	Typical	9	15	15	15	Typical	9	13	13	13	Typical	10	20	20	20	Typical	10	18	18	18	Typical	6	9	9	9	Typical	16	32	32	32	Typical	19	35	35	35	Typical	11	22	22	22
tr|G1T0T3|G1T0T3_RABIT	GEMIN5	Uncharacterized protein OS=Oryctolagus cuniculus (Rabbit) GN=GEMIN5 PE=4 SV=1		Typical	8	15	15	15	Typical	8	12	12	12	Typical	7	8	8	8	Typical	6	9	9	9	Typical	6	10	10	10	Typical	5	10	10	10	Typical	8	14	14	14	Typical	8	13	13	13	Typical	5	10	10	10
tr|G1SUV5|G1SUV5_RABIT	HSP90 (Interpro)	Uncharacterized protein OS=Oryctolagus cuniculus (Rabbit) GN=HSP90AB1 PE=3 SV=1		Typical	7	15	0	0	Typical	8	12	0	0	Typical	6	9	0	0	Typical	5	6	0	0	Typical	5	11	0	0	Typical	5	15	0	0	Typical	4	6	0	0	Typical	4	9	0	0	Typical	5	9	0	0
tr|G1SCU8|G1SCU8_RABIT	OTUD6B	Uncharacterized protein OS=Oryctolagus cuniculus (Rabbit) GN=OTUD6B PE=4 SV=1		Typical	6	15	15	15	Typical	5	9	9	9	Typical	5	10	10	10	Typical	5	13	13	13	Typical	5	12	12	12	Typical	5	15	15	15	Typical	4	16	16	16	Typical	4	10	10	10	Typical	3	13	13	13
tr|G1SH66|G1SH66_RABIT	RBM3	Uncharacterized protein OS=Oryctolagus cuniculus (Rabbit) GN=RBM3 PE=4 SV=1		Typical	2	15	15	15	Typical	2	19	19	19	Typical	2	19	19	19	Typical	1	20	20	20	Typical	1	23	23	23	Typical	2	19	19	19	Typical	3	26	26	26	Typical	2	30	30	30	Typical	1	22	22	22
tr|G1SPU6|G1SPU6_RABIT	ACT (InterPro)	Actin, cytoplasmic 1 OS=Oryctolagus cuniculus (Rabbit) GN=ACTB PE=3 SV=2		Typical	7	14	5	10.3077	Typical	10	24	4	15.5	Typical	10	22	5	14.5385	Typical	10	24	5	15.7692	Typical	8	22	6	15.0385	Typical	7	19	4	12.4231	Typical	9	26	5	17	Typical	12	34	7	22.6923	Typical	12	34	7	22.4615
sp|P29751|ACTB_RABIT	ACTB	Actin, cytoplasmic 1 OS=Oryctolagus cuniculus (Rabbit) GN=ACTB PE=2 SV=1		Typical	8	14	3	7.56731	Typical	11	24	3	10.8125	Typical	11	21	3	9.58654	Typical	11	23	3	10.3558	Typical	9	21	3	9.89904	Typical	8	18	3	8.26442	Typical	10	24	3	10.5	Typical	14	33	4	15.0577	Typical	14	34	5	15.9135
sp|P62497|ERF1_RABIT	ETF1 ERF1 RF1	Eukaryotic peptide chain release factor subunit 1 OS=Oryctolagus cuniculus (Rabbit) GN=ETF1 PE=1 SV=3		Typical	9	14	14	14	Typical	6	9	9	9	Typical	5	8	8	8	Typical	8	13	13	13	Typical	7	17	17	17	Typical	6	14	14	14	Typical	8	12	12	12	Typical	4	8	8	8	Typical	6	10	10	10
tr|G1SJC7|G1SJC7_RABIT	G3BP2	Uncharacterized protein OS=Oryctolagus cuniculus (Rabbit) GN=G3BP2 PE=4 SV=1		Typical	6	14	9	9.38356	Typical	5	12	6	6.46027	Typical	6	15	7	7.6137	Typical	6	14	9	9.38356	Typical	4	12	5	5.53699	Typical	5	16	9	9.53698	Typical	4	10	5	5.38356	Typical	4	9	3	3.46027	Typical	4	9	3	3.46027
tr|G1T4N4|G1T4N4_RABIT	LARP1	Uncharacterized protein OS=Oryctolagus cuniculus (Rabbit) GN=LARP1 PE=4 SV=1		Typical	9	14	14	14	Typical	14	30	30	30	Typical	10	22	22	22	Typical	15	32	32	32	Typical	14	40	40	40	Typical	11	35	35	35	Typical	11	24	24	24	Typical	10	22	22	22	Typical	10	18	18	18
tr|G1SLE6|G1SLE6_RABIT	METAP1	Methionine aminopeptidase OS=Oryctolagus cuniculus (Rabbit) GN=METAP1 PE=3 SV=1		Typical	8	14	14	14	Typical	7	14	14	14	Typical	6	10	10	10	Typical	7	12	12	12	Typical	6	13	13	13	Typical	4	7	7	7	Typical	6	8	8	8	Typical	4	6	6	6	Typical	3	3	3	3
tr|G1TI02|G1TI02_RABIT	PYM1	Uncharacterized protein OS=Oryctolagus cuniculus (Rabbit) GN=WIBG PE=4 SV=2		Typical	7	14	14	14	Typical	6	11	11	11	Typical	6	13	13	13	Typical	8	18	18	18	Typical	7	13	13	13	Typical	6	12	12	12	Typical	7	16	16	16	Typical	7	13	13	13	Typical	6	9	9	9
tr|G1T8Q6|G1T8Q6_RABIT	HSP90AB1 HSPCB	Heat shock protein HSP 90-beta OS=Oryctolagus cuniculus (Rabbit) GN=HSP90AB1 PE=3 SV=2		Typical	8	14	1	10.5029	Typical	10	16	2	12.5029	Typical	7	12	3	8.50286	Typical	6	11	4	8.37714	Typical	8	18	3	11.0057	Typical	6	17	4	11.7543	Typical	7	9	1	4.62857	Typical	6	13	2	8.62857	Typical	7	12	2	8.50286
sp|P50117|S10A9_RABIT	S100A9 MRP14	Protein S100-A9 OS=Oryctolagus cuniculus (Rabbit) GN=S100A9 PE=2 SV=3		Typical	4	14	14	14	Typical	4	14	14	14	Typical	4	19	19	19	Typical	4	19	19	19	Typical	3	19	19	19	Typical	4	7	7	7	Typical	2	4	4	4	Typical	3	5	5	5	Typical	1	3	3	3
tr|G1SCD7|G1SCD7_RABIT	LOC100356907	Uncharacterized protein OS=Oryctolagus cuniculus (Rabbit) GN=LOC100356907 PE=4 SV=1		Typical	8	14	14	14	Typical	8	18	18	18	Typical	9	18	18	18	Typical	10	21	21	21	Typical	7	20	20	20	Typical	8	19	19	19	Typical	7	17	17	17	Typical	8	22	22	22	Typical	7	20	20	20
tr|G1SE01|G1SE01_RABIT	EXOC5	Uncharacterized protein OS=Oryctolagus cuniculus (Rabbit) GN=EXOC5 PE=4 SV=1		Typical	7	14	14	14	Typical	6	7	7	7	Typical	5	8	8	8	Typical	4	5	5	5	Typical	4	8	8	8	Typical	7	10	10	10	Typical	3	3	3	3	Typical	2	2	2	2	Typical	1	1	1	1
tr|G1SGV5|G1SGV5_RABIT	ABCF1	Uncharacterized protein OS=Oryctolagus cuniculus (Rabbit) GN=ABCF1 PE=3 SV=1		Typical	8	13	13	13	Typical	10	13	13	13	Typical	7	11	11	11	Typical	6	10	10	10	Typical	7	13	13	13	Typical	4	7	7	7	Typical	5	10	10	10	Typical	5	11	11	11	Typical	5	7	7	7
tr|G1SIU2|G1SIU2_RABIT	PABPC1L	Polyadenylate-binding protein OS=Oryctolagus cuniculus (Rabbit) GN=PABPC1L PE=3 SV=1		Typical	5	13	0	0	Typical	5	11	0	0	Typical	5	11	0	0	Typical	5	15	0	0	Typical	6	16	0	0	Typical	5	11	0	0	Typical	4	10	0	0	Typical	4	9	0	0	Typical	4	10	0	0
tr|G1T7R2|G1T7R2_RABIT	YWHAE	Uncharacterized protein OS=Oryctolagus cuniculus (Rabbit) GN=YWHAE PE=3 SV=1		Typical	9	13	12	12.4228	Typical	8	18	16	16.8456	Typical	7	18	16	16.8456	Typical	7	23	21	21.8456	Typical	6	24	21	22.2685	Typical	8	23	21	21.8456	Typical	11	35	32	33.2685	Typical	9	29	26	27.2685	Typical	9	27	24	25.2685
tr|G1SCW7|G1SCW7_RABIT	ABCF2	Uncharacterized protein OS=Oryctolagus cuniculus (Rabbit) GN=ABCF2 PE=3 SV=2		Typical	7	13	13	13	Typical	5	9	9	9	Typical	4	7	7	7	Typical	4	9	9	9	Typical	5	13	13	13	Typical	3	5	5	5	Typical	4	10	10	10	Typical	3	4	4	4	Typical	2	3	3	3
tr|G1SLM1|G1SLM1_RABIT	CACYBP	Uncharacterized protein OS=Oryctolagus cuniculus (Rabbit) GN=CACYBP PE=4 SV=1		Typical	4	12	12	12	Typical	6	16	16	16	Typical	5	15	15	15	Typical	5	11	11	11	Typical	3	9	9	9	Typical	4	14	14	14	Typical	3	9	9	9	Typical	6	13	13	13	Typical	4	8	8	8
tr|G1SCN8|G1SCN8_RABIT	CCT3	T-complex protein 1 subunit gamma OS=Oryctolagus cuniculus (Rabbit) GN=CCT3 PE=3 SV=2		Typical	7	12	7	11.75	Typical	16	28	16	27.4	Typical	13	24	15	23.55	Typical	7	14	11	13.85	Typical	7	10	7	9.85	Typical	6	6	4	5.9	Typical	14	24	13	23.45	Typical	18	44	25	43.05	Typical	16	30	16	29.3
tr|G1SMM5|G1SMM5_RABIT	DNAJA2	Uncharacterized protein OS=Oryctolagus cuniculus (Rabbit) GN=DNAJA2 PE=3 SV=1		Typical	6	12	12	12	Typical	6	10	10	10	Typical	5	8	8	8	Typical	4	7	7	7	Typical	2	3	3	3	Typical	4	7	7	7	Typical	3	5	5	5	Typical	2	4	4	4	Typical	2	4	4	4
tr|G1T1R9|G1T1R9_RABIT	EXOC4	Uncharacterized protein OS=Oryctolagus cuniculus (Rabbit) GN=EXOC4 PE=4 SV=1		Typical	9	12	12	12	Typical	7	10	10	10	Typical	5	7	7	7	Typical	6	9	9	9	Typical	8	11	11	11	Typical	6	9	9	9	Typical	2	3	3	3	Typical	3	4	4	4	Typical	1	1	1	1
tr|G1TN89|G1TN89_RABIT	HSPG2	Uncharacterized protein OS=Oryctolagus cuniculus (Rabbit) GN=HSPG2 PE=4 SV=2		Typical	6	12	12	12	Typical	5	9	9	9	Typical	5	9	9	9	Typical	4	8	8	8	Typical	4	11	11	11	Typical	2	5	5	5	Typical	4	7	7	7	Typical	4	10	10	10	Typical	3	5	5	5
tr|G1TBS2|G1TBS2_RABIT	RUVBL1	Uncharacterized protein OS=Oryctolagus cuniculus (Rabbit) GN=RUVBL1 PE=4 SV=1		Typical	7	12	12	12	Typical	10	15	15	15	Typical	10	12	12	12	Typical	6	9	9	9	Typical	4	6	6	6	Typical	4	6	6	6	Typical	9	14	14	14	Typical	8	10	10	10	Typical	8	12	12	12
tr|G1TM86|G1TM86_RABIT	GNL1	Uncharacterized protein OS=Oryctolagus cuniculus (Rabbit) GN=GNL1 PE=4 SV=1		Typical	9	12	12	12	Typical	5	9	9	9	Typical	4	9	9	9	Typical	5	9	9	9	Typical	4	8	8	8	Typical	3	4	4	4	Typical	1	1	1	1	Typical	1	2	2	2	Typical	1	3	3	3
tr|B7NZP3|B7NZP3_RABIT	ARD1A	N-acetyltransferase ARD1 (Predicted) OS=Oryctolagus cuniculus (Rabbit) GN=ARD1A PE=4 SV=1		Typical	5	11	11	11	Typical	4	11	11	11	Typical	3	8	8	8	Typical	3	13	13	13	Typical	3	10	10	10	Typical	3	11	11	11	Typical	3	8	8	8	Typical	2	5	5	5	Typical	2	6	6	6
tr|G1SHI7|G1SHI7_RABIT	ASAP1	Uncharacterized protein OS=Oryctolagus cuniculus (Rabbit) GN=ASAP1 PE=4 SV=1		Typical	7	11	11	11	Typical	9	14	14	14	Typical	11	20	20	20	Typical	11	20	20	20	Typical	8	14	14	14	Typical	5	9	9	9	Typical	12	21	21	21	Typical	10	20	20	20	Typical	8	15	15	15
tr|G1U636|G1U636_RABIT	CAPRIN1	Uncharacterized protein OS=Oryctolagus cuniculus (Rabbit) GN=CAPRIN1 PE=4 SV=1		Typical	8	11	11	11	Typical	6	13	13	13	Typical	8	12	12	12	Typical	8	18	18	18	Typical	6	10	10	10	Typical	7	18	18	18	Typical	5	9	9	9	Typical	4	6	6	6	Typical	3	3	3	3
tr|G1SHZ8|G1SHZ8_RABIT	CCT8	Uncharacterized protein OS=Oryctolagus cuniculus (Rabbit) GN=CCT8 PE=3 SV=2		Typical	9	11	11	11	Typical	21	31	31	31	Typical	17	30	30	30	Typical	12	16	16	16	Typical	9	14	14	14	Typical	5	9	9	9	Typical	17	28	28	28	Typical	15	32	32	32	Typical	15	22	22	22
tr|G1T657|G1T657_RABIT	HNRNPDL	Uncharacterized protein OS=Oryctolagus cuniculus (Rabbit) GN=HNRNPDL PE=4 SV=1		Typical	6	11	4	4.61415	Typical	4	8	2	2.8761	Typical	4	7	3	3.78805	Typical	5	7	2	2.83208	Typical	5	12	3	4.00818	Typical	4	9	2	2.92013	Typical	5	9	4	4.83207	Typical	4	5	1	1.48208	Subset	1	1	0	0.0440252
tr|G1T464|G1T464_RABIT	HSP90 (Interpro)	Uncharacterized protein OS=Oryctolagus cuniculus (Rabbit) PE=3 SV=1		Typical	4	11	0	0	Typical	5	7	0	0	Typical	4	6	0	0	Typical	4	5	0	0	Typical	6	9	0	0	Typical	4	11	0	0	Typical	5	5	0	0	Typical	4	8	0	0	Typical	5	8	0	0
tr|G1T5V3|G1T5V3_RABIT	RAB14	Uncharacterized protein OS=Oryctolagus cuniculus (Rabbit) GN=RAB14 PE=3 SV=1		Typical	5	11	7	8.73333	Typical	5	11	7	8.73333	Typical	5	9	7	7.86667	Typical	5	9	5	6.73333	Typical	3	7	3	4.73333	Typical	2	2	1	1.43333	Typical	5	9	5	6.73333	Typical	4	7	3	4.73333	Typical	2	5	1	2.73333
tr|G1T0U5|G1T0U5_RABIT	TIA1	Uncharacterized protein OS=Oryctolagus cuniculus (Rabbit) GN=TIA1 PE=4 SV=1		Typical	5	11	4	5.72034	Typical	4	14	3	5.70339	Typical	7	14	7	8.72034	Typical	4	9	3	4.47458	Typical	3	6	2	2.98305	Typical	4	11	3	4.9661	Typical	3	11	3	4.9661	Typical	3	7	2	3.22881	Typical	3	6	2	2.98305
tr|G1SJ56|G1SJ56_RABIT	VCL	Uncharacterized protein OS=Oryctolagus cuniculus (Rabbit) GN=VCL PE=4 SV=1		Typical	6	11	11	11	Typical	7	13	13	13	Typical	6	11	11	11	Typical	4	6	6	6	Typical	5	9	9	9	Typical	4	8	8	8	Typical	6	12	12	12	Typical	6	8	8	8	Typical	5	7	7	7
tr|G1TA11|G1TA11_RABIT	RARS	Uncharacterized protein OS=Oryctolagus cuniculus (Rabbit) GN=RARS PE=3 SV=2		Typical	9	11	11	11	Typical	2	2	2	2	Typical	6	6	6	6	Typical	7	8	8	8	Typical	3	4	4	4	Typical	2	3	3	3	Typical	16	31	31	31	Typical	13	23	23	23	Typical	11	18	18	18
tr|G1SNL7|G1SNL7_RABIT	ASCC2	Uncharacterized protein OS=Oryctolagus cuniculus (Rabbit) GN=ASCC2 PE=4 SV=2		Typical	8	10	10	10	Typical	4	5	5	5	Typical	6	9	9	9	Typical	1	4	4	4	Typical	3	6	6	6	Typical	2	5	5	5	Typical	4	5	5	5	Typical	1	2	2	2	Typical	2	3	3	3
tr|G1T0B0|G1T0B0_RABIT	C11orf68	Uncharacterized protein OS=Oryctolagus cuniculus (Rabbit) GN=C11orf68 PE=4 SV=1		Typical	5	10	10	10	Typical	6	10	10	10	Typical	5	8	8	8	Typical	3	7	7	7	Typical	3	7	7	7	Typical	1	3	3	3	Typical	4	8	8	8	Typical	2	7	7	7	Typical	3	7	7	7
tr|U3KM64|U3KM64_RABIT	CLTA	Uncharacterized protein OS=Oryctolagus cuniculus (Rabbit) GN=CLTA PE=4 SV=1		Typical	4	10	10	10	Typical	3	7	7	7	Typical	4	7	7	7	Typical	1	4	4	4	Typical	2	5	5	5	Typical	2	6	6	6	Typical	3	8	8	8	Typical	3	7	7	7	Typical	3	4	4	4
tr|G1SFV7|G1SFV7_RABIT	DDB1	Uncharacterized protein OS=Oryctolagus cuniculus (Rabbit) GN=DDB1 PE=4 SV=1		Typical	9	10	10	10	Typical	5	6	6	6	Typical	6	8	8	8	Typical	4	4	4	4		0	0	0	0	Typical	2	2	2	2	Typical	2	2	2	2	Typical	1	1	1	1	Typical	1	1	1	1
tr|G1TX81|G1TX81_RABIT	LGALS9	Galectin OS=Oryctolagus cuniculus (Rabbit) GN=LGALS9 PE=4 SV=2		Typical	5	10	10	10	Typical	3	4	4	4	Typical	5	7	7	7	Typical	3	5	5	5	Typical	2	2	2	2	Typical	2	5	5	5	Typical	1	2	2	2	Typical	1	1	1	1	Typical	1	1	1	1
tr|G1TDK0|G1TDK0_RABIT	MYL6	Uncharacterized protein OS=Oryctolagus cuniculus (Rabbit) GN=MYL6 PE=4 SV=1		Typical	5	10	10	10	Typical	8	13	13	13	Typical	5	14	14	14	Typical	6	10	10	10	Typical	4	10	10	10	Typical	5	7	7	7	Typical	3	5	5	5	Typical	2	2	2	2	Typical	2	4	4	4
tr|G1U3G0|G1U3G0_RABIT	UBE2O	Uncharacterized protein OS=Oryctolagus cuniculus (Rabbit) GN=UBE2O PE=4 SV=1		Typical	6	10	10	10	Typical	7	9	9	9	Typical	5	7	7	7	Typical	4	6	6	6	Typical	3	5	5	5	Typical	4	6	6	6	Typical	1	2	2	2	Typical	1	2	2	2	Typical	1	1	1	1
tr|U3KMB3|U3KMB3_RABIT	PARP9	Uncharacterized protein OS=Oryctolagus cuniculus (Rabbit) GN=PARP9 PE=4 SV=1		Sameset	8	10	10	10	Typical	7	8	8	8	Sameset	4	6	6	6	Sameset	7	9	9	9	Sameset	4	6	6	6	Sameset	3	4	4	4	Sameset	2	3	3	3		0	0	0	0		0	0	0	0
sp|P00919|CAH2_RABIT	CA2	Carbonic anhydrase 2 OS=Oryctolagus cuniculus (Rabbit) GN=CA2 PE=1 SV=3		Typical	4	9	9	9	Typical	8	17	17	17	Typical	6	14	14	14	Typical	7	23	23	23	Typical	9	33	33	33	Typical	7	17	17	17	Typical	10	40	40	40	Typical	8	36	36	36	Typical	9	45	45	45
tr|G1SF64|G1SF64_RABIT	CELF1	Uncharacterized protein OS=Oryctolagus cuniculus (Rabbit) GN=CELF1 PE=4 SV=1		Typical	5	9	9	9	Typical	4	9	9	9	Typical	8	16	16	16	Typical	8	19	19	19	Typical	6	17	17	17	Typical	4	6	6	6	Typical	7	18	18	18	Typical	8	23	23	23	Typical	6	12	12	12
tr|G1SF95|G1SF95_RABIT	HNRNPD	Uncharacterized protein OS=Oryctolagus cuniculus (Rabbit) GN=HNRNPD PE=4 SV=1		Typical	4	9	8	8.65	Typical	4	7	5	6.3	Typical	2	4	2	3.3	Typical	3	5	3	4.3	Typical	3	10	8	9.3	Typical	3	7	5	6.3	Typical	3	6	4	5.3	Typical	3	4	3	3.65	Typical	1	1	1	1
tr|G1SIP2|G1SIP2_RABIT	HNRNPL	Uncharacterized protein OS=Oryctolagus cuniculus (Rabbit) GN=HNRNPL PE=4 SV=1		Typical	6	9	9	9	Typical	4	4	4	4	Typical	4	5	5	5	Typical	2	2	2	2	Typical	1	1	1	1		0	0	0	0	Typical	3	3	3	3	Typical	4	4	4	4	Typical	2	2	2	2
tr|G1SUH8|G1SUH8_RABIT	KRT2	Uncharacterized protein OS=Oryctolagus cuniculus (Rabbit) GN=KRT2 PE=3 SV=1		Typical	5	9	0	0	Subset	1	1	0	0	Typical	4	4	0	0	Typical	8	43	0	0	Subset	1	1	0	0	Subset	1	1	0	0	Typical	5	6	0	0	Subset	2	5	0	0	Typical	8	28	0	0
tr|G1SRL3|G1SRL3_RABIT	NMT1	Glycylpeptide N-tetradecanoyltransferase OS=Oryctolagus cuniculus (Rabbit) GN=NMT1 PE=3 SV=2		Typical	7	9	9	9	Typical	7	13	13	13	Typical	6	12	12	12	Typical	5	9	9	9	Typical	4	8	8	8	Typical	4	7	7	7	Typical	4	6	6	6	Typical	4	7	7	7	Typical	3	3	3	3
tr|G1SJ93|G1SJ93_RABIT	PARP12	Uncharacterized protein OS=Oryctolagus cuniculus (Rabbit) GN=PARP12 PE=4 SV=2		Typical	5	9	9	9	Typical	6	7	7	7	Typical	5	8	8	8	Typical	3	4	4	4	Typical	2	3	3	3	Typical	1	2	2	2	Typical	7	10	10	10	Typical	7	11	11	11	Typical	4	5	5	5
tr|G1STL1|G1STL1_RABIT	PPIL4	Uncharacterized protein OS=Oryctolagus cuniculus (Rabbit) GN=PPIL4 PE=4 SV=1		Typical	5	9	9	9	Typical	3	4	4	4	Typical	3	6	6	6	Typical	3	5	5	5	Typical	3	5	5	5	Typical	3	6	6	6	Typical	4	9	9	9	Typical	3	6	6	6	Typical	2	3	3	3
tr|G1STX4|G1STX4_RABIT	SRP54	Uncharacterized protein OS=Oryctolagus cuniculus (Rabbit) GN=SRP54 PE=3 SV=1		Typical	4	9	9	9	Typical	6	10	10	10	Typical	7	13	13	13	Typical	5	6	6	6	Typical	6	9	9	9	Typical	5	9	9	9	Typical	7	11	11	11	Typical	3	5	5	5	Typical	3	4	4	4
tr|G1SR03|G1SR03_RABIT	VCP	Uncharacterized protein OS=Oryctolagus cuniculus (Rabbit) GN=VCP PE=3 SV=1		Typical	8	9	9	9	Typical	8	12	12	12	Typical	6	9	9	9	Typical	6	8	8	8	Typical	6	7	7	7	Typical	4	5	5	5	Typical	8	13	13	13	Typical	8	14	14	14	Typical	8	12	12	12
tr|G1SGA9|G1SGA9_RABIT	XRN1	Uncharacterized protein OS=Oryctolagus cuniculus (Rabbit) GN=XRN1 PE=4 SV=2		Typical	6	9	9	9	Typical	6	7	7	7	Typical	5	5	5	5	Typical	1	1	1	1	Typical	4	4	4	4	Typical	1	1	1	1	Typical	3	4	4	4		0	0	0	0	Typical	2	2	2	2
tr|G1TZP0|G1TZP0_RABIT	YWHAG	Uncharacterized protein OS=Oryctolagus cuniculus (Rabbit) GN=YWHAG PE=3 SV=1		Typical	5	9	3	4.25369	Typical	7	17	5	6.97818	Typical	7	14	4	5.64016	Typical	4	10	1	2.43245	Typical	4	13	2	3.65516	Typical	7	15	3	5.20729	Typical	5	15	2	4.20614	Typical	5	13	2	3.72614	Typical	6	12	2	3.62812
tr|G1SHT6|G1SHT6_RABIT	PABPC1L2B	Uncharacterized protein OS=Oryctolagus cuniculus (Rabbit) GN=LOC100356494 PE=4 SV=1		Typical	3	9	0	0	Typical	3	8	0	0	Typical	3	9	0	0	Typical	3	10	0	0	Typical	3	8	0	0	Typical	3	11	0	0	Typical	3	8	0	0	Typical	3	7	0	0	Typical	3	7	0	0
tr|G1SCP0|G1SCP0_RABIT	AP3B1	Uncharacterized protein OS=Oryctolagus cuniculus (Rabbit) GN=AP3B1 PE=4 SV=1		Typical	6	8	8	8	Typical	4	5	5	5	Typical	4	7	7	7	Typical	4	5	5	5	Typical	5	10	10	10	Typical	2	2	2	2	Typical	4	5	5	5	Typical	4	6	6	6	Typical	4	4	4	4
tr|U3KNN8|U3KNN8_RABIT	DIS3L2	Uncharacterized protein OS=Oryctolagus cuniculus (Rabbit) GN=DIS3L2 PE=4 SV=1		Typical	6	8	8	8	Typical	8	11	11	11	Typical	6	8	8	8	Typical	5	8	8	8	Typical	6	8	8	8	Typical	2	5	5	5	Typical	4	4	4	4	Typical	3	3	3	3	Typical	1	1	1	1
tr|G1SIH5|G1SIH5_RABIT	IFIH1	Uncharacterized protein OS=Oryctolagus cuniculus (Rabbit) GN=IFIH1 PE=4 SV=1		Typical	8	8	8	8	Typical	6	7	7	7	Typical	8	9	9	9	Typical	4	4	4	4	Typical	3	5	5	5	Typical	3	5	5	5	Typical	4	4	4	4	Typical	5	6	6	6	Typical	3	3	3	3
tr|G1SNX5|G1SNX5_RABIT	ILF2	Uncharacterized protein OS=Oryctolagus cuniculus (Rabbit) GN=ILF2 PE=4 SV=2		Typical	6	8	8	8	Typical	4	6	6	6	Typical	3	4	4	4	Typical	5	8	8	8	Typical	5	7	7	7	Typical	4	4	4	4	Typical	3	3	3	3	Typical	2	2	2	2	Typical	3	3	3	3
tr|G1T6I6|G1T6I6_RABIT	ILF3	Uncharacterized protein OS=Oryctolagus cuniculus (Rabbit) GN=ILF3 PE=4 SV=1		Typical	7	8	8	8	Typical	8	8	8	8	Typical	2	2	2	2	Typical	8	11	11	11	Typical	7	11	11	11	Typical	3	5	5	5	Typical	2	2	2	2	Typical	2	2	2	2	Typical	2	2	2	2
tr|G1SGB7|G1SGB7_RABIT	MAGOH	Uncharacterized protein OS=Oryctolagus cuniculus (Rabbit) GN=MAGOH PE=4 SV=1		Typical	3	8	8	8	Typical	3	6	6	6	Typical	3	5	5	5	Typical	2	5	5	5	Typical	3	7	7	7	Typical	3	6	6	6		0	0	0	0	Typical	2	3	3	3	Typical	2	2	2	2
tr|G1TVY8|G1TVY8_RABIT	PELO	Protein pelota homolog OS=Oryctolagus cuniculus (Rabbit) GN=PELO PE=3 SV=1		Typical	7	8	8	8	Typical	6	7	7	7	Typical	5	6	6	6	Typical	6	9	9	9	Typical	3	5	5	5	Typical	5	7	7	7	Typical	1	1	1	1	Typical	1	2	2	2		0	0	0	0
tr|G1TSM9|G1TSM9_RABIT	PRRC2A	Uncharacterized protein OS=Oryctolagus cuniculus (Rabbit) GN=PRRC2A PE=4 SV=1		Typical	4	8	8	8	Typical	7	10	9	9.58042	Typical	7	13	13	13	Typical	6	10	10	10	Typical	8	13	13	13	Typical	3	7	7	7	Typical	4	10	10	10	Typical	4	8	8	8	Typical	3	5	5	5
tr|G1TAK0|G1TAK0_RABIT	PRRC2C	Uncharacterized protein OS=Oryctolagus cuniculus (Rabbit) GN=PRRC2C PE=4 SV=1		Typical	5	8	8	8	Typical	4	4	3	3.41958	Typical	5	5	5	5	Typical	7	10	10	10	Typical	5	8	8	8	Typical	3	3	3	3	Typical	8	9	9	9	Typical	7	9	9	9	Typical	4	5	5	5
tr|G1SS77|G1SS77_RABIT	SKIV2L	Uncharacterized protein OS=Oryctolagus cuniculus (Rabbit) GN=SKIV2L PE=4 SV=1		Typical	7	8	8	8	Typical	12	20	20	20	Typical	10	12	12	12	Typical	7	12	12	12	Typical	7	12	12	12	Typical	5	7	7	7	Typical	4	5	5	5	Typical	3	6	6	6	Typical	3	4	4	4
tr|G1SJW8|G1SJW8_RABIT	USP7	Ubiquitin carboxyl-terminal hydrolase OS=Oryctolagus cuniculus (Rabbit) GN=USP7 PE=4 SV=1		Typical	6	8	8	8	Typical	5	7	7	7	Typical	4	5	5	5	Typical	5	6	6	6	Typical	1	2	2	2	Typical	4	5	5	5	Typical	3	4	4	4	Typical	2	3	3	3	Typical	3	4	4	4
tr|G1SHS8|G1SHS8_RABIT	VTA1	Uncharacterized protein OS=Oryctolagus cuniculus (Rabbit) GN=VTA1 PE=4 SV=2		Typical	4	8	8	8	Typical	4	7	7	7	Typical	4	8	8	8	Typical	3	9	9	9	Typical	3	7	7	7	Typical	2	2	2	2	Typical	3	4	4	4	Typical	3	6	6	6	Typical	3	5	5	5
tr|U3KN58|U3KN58_RABIT	ZC3HAV1	Poly [ADP-ribose] polymerase OS=Oryctolagus cuniculus (Rabbit) GN=ZC3HAV1 PE=4 SV=1		Sameset	6	8	8	8	Typical	8	11	11	11	Typical	9	14	14	14	Typical	8	13	13	13	Sameset	4	5	5	5	Typical	3	4	4	4	Sameset	3	6	6	6	Sameset	4	6	6	6	Sameset	2	2	2	2
tr|U3KMX6|U3KMX6_RABIT	BTF3	Transcription factor BTF3 OS=Oryctolagus cuniculus (Rabbit) GN=BTF3 PE=3 SV=1		Sameset	5	8	8	8	Typical	6	8	8	8	Typical	7	9	9	9	Typical	8	12	12	12	Typical	8	12	12	12	Typical	7	14	14	14	Sameset	2	3	3	3	Sameset	2	2	2	2	Sameset	2	3	3	3
tr|G1U101|G1U101_RABIT	HECTD4	Uncharacterized protein OS=Oryctolagus cuniculus (Rabbit) GN=HECTD4 PE=4 SV=2		Typical	6	8	8	8	Typical	7	8	8	8	Typical	7	8	8	8	Typical	4	5	5	5	Typical	2	4	4	4	Typical	1	2	2	2	Typical	2	2	2	2	Typical	1	1	1	1	Typical	1	1	1	1
tr|G1SFW9|G1SFW9_RABIT	ACIN1	Uncharacterized protein OS=Oryctolagus cuniculus (Rabbit) GN=ACIN1 PE=4 SV=1		Typical	6	7	7	7	Typical	4	8	8	8	Typical	5	10	10	10	Typical	5	8	8	8	Typical	6	9	9	9	Typical	3	5	5	5	Typical	6	10	10	10	Typical	3	5	5	5	Typical	2	2	2	2
tr|G1T8W7|G1T8W7_RABIT	ATP6V0A1	V-type proton ATPase subunit a OS=Oryctolagus cuniculus (Rabbit) GN=ATP6V0A1 PE=3 SV=2		Typical	6	7	7	7	Typical	4	5	5	5	Typical	4	4	4	4	Typical	2	2	2	2	Typical	2	2	2	2	Typical	2	3	3	3		0	0	0	0		0	0	0	0		0	0	0	0
tr|B6V9S9|B6V9S9_RABIT	CCT2	Chaperonin-containing T-complex polypeptide beta subunit OS=Oryctolagus cuniculus (Rabbit) GN=CCT2 PE=2 SV=1		Typical	6	7	7	7	Typical	17	30	30	30	Typical	15	27	27	27	Typical	10	18	18	18	Typical	8	15	15	15	Typical	7	10	10	10	Typical	14	29	29	29	Typical	18	41	41	41	Typical	15	32	32	32
tr|G1SGJ5|G1SGJ5_RABIT	CNOT9	Uncharacterized protein OS=Oryctolagus cuniculus (Rabbit) GN=RQCD1 PE=4 SV=1		Typical	4	7	7	7	Typical	2	6	6	6	Typical	4	7	7	7	Typical	4	9	9	9	Typical	3	5	5	5	Typical	1	2	2	2		0	0	0	0	Typical	1	2	2	2	Typical	1	2	2	2
tr|G1SR61|G1SR61_RABIT	DHX30	Uncharacterized protein OS=Oryctolagus cuniculus (Rabbit) GN=DHX30 PE=4 SV=1		Typical	5	7	7	7	Typical	6	9	9	9	Typical	4	6	6	6	Typical	5	7	7	7	Typical	6	9	9	9	Typical	3	4	4	4	Typical	5	6	6	6	Typical	3	5	5	5	Typical	2	2	2	2
tr|G1SS80|G1SS80_RABIT	DXO	Uncharacterized protein OS=Oryctolagus cuniculus (Rabbit) GN=DXO PE=4 SV=1		Typical	5	7	7	7	Typical	5	8	8	8	Typical	4	5	5	5	Typical	4	6	6	6	Typical	1	1	1	1	Typical	3	3	3	3	Typical	5	12	12	12	Typical	4	9	9	9	Typical	3	6	6	6
tr|G1SZW8|G1SZW8_RABIT	EPS15L1	Uncharacterized protein OS=Oryctolagus cuniculus (Rabbit) GN=EPS15L1 PE=4 SV=1		Typical	6	7	7	7	Typical	6	7	7	7	Typical	5	6	6	6	Typical	3	4	4	4	Typical	5	6	6	6	Typical	4	4	4	4	Typical	3	3	3	3	Typical	3	4	4	4	Typical	1	1	1	1
tr|G1SK12|G1SK12_RABIT	PTPN6	Uncharacterized protein OS=Oryctolagus cuniculus (Rabbit) GN=PTPN6 PE=4 SV=1		Typical	4	7	7	7	Typical	2	3	3	3	Typical	5	6	6	6	Typical	2	3	3	3	Typical	2	2	2	2	Typical	1	2	2	2	Typical	1	2	2	2		0	0	0	0		0	0	0	0
tr|G1TX03|G1TX03_RABIT	RBM8A	RNA-binding protein 8A OS=Oryctolagus cuniculus (Rabbit) GN=RBM8A PE=3 SV=1		Typical	2	7	7	7	Typical	1	5	5	5	Typical	1	4	4	4	Typical	1	3	3	3	Typical	1	4	4	4	Typical	1	4	4	4	Typical	1	3	3	3	Typical	1	4	4	4	Typical	1	2	2	2
tr|G1SKJ9|G1SKJ9_RABIT	RNaseII (InterPro)	Uncharacterized protein OS=Oryctolagus cuniculus (Rabbit) PE=4 SV=2		Typical	3	7	7	7	Typical	3	6	6	6	Typical	5	9	9	9	Typical	4	7	7	7	Typical	3	6	6	6	Typical	3	7	7	7	Typical	2	3	3	3	Typical	1	2	2	2	Typical	1	2	2	2
tr|G1SRW8|G1SRW8_RABIT	SLFN14	Uncharacterized protein OS=Oryctolagus cuniculus (Rabbit) GN=SLFN14 PE=4 SV=2		Typical	6	7	7	7	Typical	10	15	15	15	Typical	8	10	10	10	Typical	10	17	17	17	Typical	13	24	24	24	Typical	12	26	26	26	Typical	27	68	68	68	Typical	20	51	51	51	Typical	21	60	60	60
tr|G1T550|G1T550_RABIT	RAB5C	Uncharacterized protein OS=Oryctolagus cuniculus (Rabbit) GN=RAB5C PE=3 SV=1		Typical	6	7	5	6.61538	Sameset	2	4	0	3.23077		0	0	0	0	Typical	1	1	1	1	Typical	3	5	3	4.61538	Typical	3	5	5	5	Typical	2	2	2	2	Typical	1	2	2	2	Typical	2	3	3	3
tr|G1TWC2|G1TWC2_RABIT	TAOK3	Uncharacterized protein OS=Oryctolagus cuniculus (Rabbit) GN=TAOK3 PE=4 SV=1		Typical	5	7	7	7	Typical	4	6	6	6	Typical	4	6	6	6	Typical	4	5	5	5	Typical	3	4	4	4	Typical	3	7	7	7	Typical	3	3	3	3	Typical	3	4	4	4	Typical	2	3	3	3
tr|G1TNY0|G1TNY0_RABIT		Uncharacterized protein OS=Oryctolagus cuniculus (Rabbit) GN=SH3BP1 PE=4 SV=1		Typical	6	7	7	7	Typical	2	3	3	3	Typical	2	3	3	3	Typical	2	3	3	3	Typical	1	2	2	2	Typical	1	1	1	1	Typical	3	4	4	4	Typical	1	1	1	1	Typical	2	3	3	3
tr|G1SIJ8|G1SIJ8_RABIT	IPO4	Uncharacterized protein OS=Oryctolagus cuniculus (Rabbit) GN=IPO4 PE=4 SV=1		Typical	5	7	7	7	Typical	3	4	4	4	Typical	3	4	4	4	Typical	2	4	4	4	Typical	3	6	6	6	Typical	3	6	6	6	Typical	3	8	8	8	Typical	5	7	7	7	Typical	3	4	4	4
tr|G1TFI4|G1TFI4_RABIT	BTF3L4	Transcription factor BTF3 OS=Oryctolagus cuniculus (Rabbit) GN=BTF3L4 PE=3 SV=1		Typical	3	6	6	6	Typical	3	5	5	5	Typical	3	7	7	7	Typical	2	6	6	6	Typical	2	7	7	7	Typical	3	9	9	9	Typical	1	2	2	2	Typical	1	2	2	2	Typical	1	2	2	2
tr|G1SN31|G1SN31_RABIT	CA1	Carbonic anhydrase 1 OS=Oryctolagus cuniculus (Rabbit) GN=CA1 PE=4 SV=1		Typical	3	6	3	4.89474	Typical	4	11	4	8.42105	Typical	4	9	4	7.15789	Typical	3	8	5	6.89474	Typical	3	12	4	9.05263	Typical	4	11	4	8.42105	Typical	5	18	7	13.9474	Typical	4	17	7	13.3158	Typical	4	24	10	18.8421
tr|G1U446|G1U446_RABIT	CLINT1	Uncharacterized protein OS=Oryctolagus cuniculus (Rabbit) GN=CLINT1 PE=4 SV=2		Typical	4	6	6	6	Typical	5	10	10	10	Typical	2	2	2	2	Typical	3	4	4	4	Typical	3	4	4	4	Typical	2	2	2	2		0	0	0	0	Typical	1	1	1	1		0	0	0	0
tr|G1SEX6|G1SEX6_RABIT	DHX36	Uncharacterized protein OS=Oryctolagus cuniculus (Rabbit) GN=DHX36 PE=4 SV=1		Typical	4	6	5	6	Typical	3	4	4	4	Typical	2	2	2	2	Typical	1	2	2	2	Typical	1	2	2	2	Typical	1	2	2	2		0	0	0	0		0	0	0	0		0	0	0	0
tr|G1SCV4|G1SCV4_RABIT	DNAJA4	Uncharacterized protein OS=Oryctolagus cuniculus (Rabbit) GN=DNAJA4 PE=4 SV=1		Typical	6	6	6	6	Typical	4	4	4	4	Typical	6	7	7	7	Typical	2	2	2	2	Typical	2	2	2	2	Typical	1	1	1	1	Typical	2	3	3	3		0	0	0	0		0	0	0	0
tr|G1SH81|G1SH81_RABIT	EGD2 (InterPro)	Uncharacterized protein OS=Oryctolagus cuniculus (Rabbit) GN=NACA2 PE=4 SV=2		Typical	4	6	6	6	Typical	4	10	10	10	Typical	4	7	7	7	Typical	3	13	13	13	Typical	3	20	20	20	Typical	2	5	5	5	Typical	4	13	13	13	Typical	3	9	9	9	Typical	4	9	9	9
tr|G1TKK9|G1TKK9_RABIT	ISG15	Uncharacterized protein OS=Oryctolagus cuniculus (Rabbit) GN=ISG15 PE=4 SV=1		Typical	3	6	6	6	Typical	4	6	6	6	Typical	3	6	6	6	Typical	3	8	8	8	Typical	3	4	4	4	Typical	4	10	10	10	Typical	4	5	5	5	Typical	4	6	6	6	Typical	3	4	4	4
tr|G1T3B8|G1T3B8_RABIT	KIF2C	Kinesin-like protein OS=Oryctolagus cuniculus (Rabbit) GN=KIF2C PE=3 SV=1		Typical	4	6	6	6	Typical	4	5	5	5	Typical	2	3	3	3	Typical	3	7	7	7	Typical	5	7	7	7	Typical	2	5	5	5	Typical	3	6	6	6	Typical	3	6	6	6	Typical	3	4	4	4
tr|G1T4S1|G1T4S1_RABIT	KRT13	Uncharacterized protein OS=Oryctolagus cuniculus (Rabbit) GN=KRT13 PE=3 SV=2		Subset	3	6	0	0	Subset	3	5	0	0	Subset	3	6	0	0	Typical	10	31	0	0	Subset	4	11	0	0	Subset	2	4	0	0	Subset	4	9	0	0	Subset	4	8	0	0	Subset	7	20	0	0
tr|G1T1Y7|G1T1Y7_RABIT	KRT14	Uncharacterized protein OS=Oryctolagus cuniculus (Rabbit) GN=KRT14 PE=3 SV=2		Subset	3	6	0	0.224141	Subset	3	5	0	0.188846	Subset	3	6	0	0.224141	Typical	13	40	9	17.7422	Subset	3	10	0	0.374026	Subset	2	4	0	0.153552	Subset	3	8	0	0.29725	Subset	3	7	0	0.261956	Typical	5	13	0	1.03486
tr|G1TDN6|G1TDN6_RABIT	KRT5	Uncharacterized protein OS=Oryctolagus cuniculus (Rabbit) GN=KRT5 PE=3 SV=1		Typical	5	6	1	3.45767	Subset	1	1	0	0.155496	Typical	3	3	1	1.4278	Typical	22	68	45	52.8623	Typical	4	4	2	2.4278	Subset	1	1	0	0.155496	Typical	6	6	3	3.7001	Typical	3	3	1	1.4278	Typical	9	19	5	8.34541
tr|G1SRQ7|G1SRQ7_RABIT	NCAPG	Uncharacterized protein OS=Oryctolagus cuniculus (Rabbit) GN=NCAPG PE=4 SV=2		Typical	5	6	6	6	Typical	10	13	13	13	Typical	12	15	15	15	Typical	8	13	13	13	Typical	6	9	9	9	Typical	6	8	8	8	Typical	4	5	5	5	Typical	6	11	11	11	Typical	5	11	11	11
tr|G1TE64|G1TE64_RABIT	PTBP3	Uncharacterized protein OS=Oryctolagus cuniculus (Rabbit) GN=PTBP3 PE=4 SV=2		Typical	2	6	6	6	Typical	2	6	6	6	Typical	3	7	7	7	Typical	3	7	7	7	Typical	2	5	5	5	Typical	2	5	5	5	Typical	1	4	4	4	Typical	2	6	6	6	Typical	1	4	4	4
tr|U3KMP1|U3KMP1_RABIT	RAB10	Uncharacterized protein OS=Oryctolagus cuniculus (Rabbit) GN=RAB10 PE=3 SV=1		Subset	2	6	0	0.334641	Subset	2	7	0	0.413072	Typical	3	5	1	1.24575	Typical	3	7	1	1.33464	Subset	2	7	0	0.413072	Typical	2	2	1	1.04444	Typical	3	9	1	1.4915	Subset	2	9	0	0.569935	Subset	2	8	0	0.491503
sp|P62493|RB11A_RABIT	RAB11A RAB11	Ras-related protein Rab-11A OS=Oryctolagus cuniculus (Rabbit) GN=RAB11A PE=2 SV=3		Typical	4	6	2	5.38462	Typical	3	5	1	4.38462	Typical	3	3	1	2.69231	Typical	2	2	1	1.84615	Subset	1	2	0	1.69231	Typical	2	4	2	3.69231	Typical	4	6	2	5.38462	Typical	3	4	2	3.69231		0	0	0	0
tr|G1T0F6|G1T0F6_RABIT	SRP68	Signal recognition particle subunit SRP68 OS=Oryctolagus cuniculus (Rabbit) GN=SRP68 PE=3 SV=1		Typical	5	6	6	6	Typical	4	4	4	4	Typical	4	4	4	4	Typical	4	4	4	4	Typical	6	10	10	10	Typical	5	6	6	6	Typical	8	9	9	9	Typical	4	5	5	5		0	0	0	0
tr|G1T4P7|G1T4P7_RABIT	TLN2	Uncharacterized protein OS=Oryctolagus cuniculus (Rabbit) GN=TLN2 PE=4 SV=1		Typical	3	6	6	6	Typical	3	4	4	4	Typical	2	2	2	2	Typical	2	3	3	3	Typical	2	3	3	3	Subset	1	1	0	0.180451	Typical	2	3	3	3	Typical	1	2	2	2	Typical	1	1	1	1
tr|G1T057|G1T057_RABIT	TTC37	Uncharacterized protein OS=Oryctolagus cuniculus (Rabbit) GN=TTC37 PE=4 SV=2		Typical	5	6	6	6	Typical	12	15	15	15	Typical	8	11	11	11	Typical	10	14	14	14	Typical	5	8	8	8	Typical	7	9	9	9	Typical	2	2	2	2	Typical	3	3	3	3	Typical	3	3	3	3
tr|G1SDY5|G1SDY5_RABIT	YWHAZ	Uncharacterized protein OS=Oryctolagus cuniculus (Rabbit) GN=YWHAZ PE=3 SV=1		Typical	4	6	2	2.42149	Typical	6	8	1	3.26251	Typical	4	8	1	1.64613	Typical	4	6	2	3.94211	Typical	5	9	2	3.42723	Typical	5	7	1	2.35878	Typical	5	9	2	5.04248	Typical	5	7	1	3.10498	Typical	6	10	3	5.23429
tr|Q95L83|Q95L83_RABIT		Beta-actin OS=Oryctolagus cuniculus (Rabbit) PE=2 SV=1		Typical	4	6	2	3.125	Typical	5	10	2	3.6875	Typical	5	11	2	3.875	Typical	5	11	2	3.875	Typical	5	11	2	4.0625	Typical	3	9	2	3.3125	Typical	4	10	2	3.5	Typical	5	12	2	4.25	Typical	5	14	2	4.625
tr|G1SQ02|G1SQ02_RABIT	PRDX1	Uncharacterized protein OS=Oryctolagus cuniculus (Rabbit) GN=PRDX1 PE=4 SV=1		Sameset	4	6	5	5.71831	Sameset	3	5	4	4.71831	Sameset	2	6	5	5.71831	Sameset	2	5	3	4.43662	Sameset	4	7	5	6.43662	Sameset	1	3	3	3	Sameset	4	9	8	8.71831	Sameset	5	10	7	9.15493	Typical	6	14	11	13.1549
tr|G1SUN6|G1SUN6_RABIT	NCAPD2	Condensin complex subunit 1 OS=Oryctolagus cuniculus (Rabbit) GN=NCAPD2 PE=3 SV=2		Typical	6	6	6	6	Typical	17	22	22	22	Typical	13	22	22	22	Typical	14	26	26	26	Typical	8	13	13	13	Typical	3	7	7	7	Typical	13	20	20	20	Typical	17	31	31	31	Typical	17	27	27	27
tr|G1U5Q4|G1U5Q4_RABIT	EXOC8	Uncharacterized protein OS=Oryctolagus cuniculus (Rabbit) GN=EXOC8 PE=4 SV=1		Typical	3	6	6	6	Typical	4	6	6	6	Typical	4	7	7	7	Typical	1	1	1	1		0	0	0	0	Typical	3	4	4	4	Sameset	2	2	2	2	Sameset	2	4	4	4	Sameset	2	2	2	2
tr|Q6R8J5|Q6R8J5_RABIT	CCT3	Chaperonin-containing TCP-1 subunit gamma OS=Oryctolagus cuniculus (Rabbit) GN=CCT3 PE=2 SV=1		Subset	3	5	0	0.25	Typical	8	13	1	1.6	Subset	5	9	0	0.45	Typical	3	5	2	2.15	Subset	2	3	0	0.15	Subset	2	2	0	0.1	Typical	8	12	1	1.55	Typical	9	20	1	1.95	Typical	9	15	1	1.7
sp|O77622|TCPZ_RABIT	CCT6	T-complex protein 1 subunit zeta OS=Oryctolagus cuniculus (Rabbit) GN=CCT6 PE=1 SV=3		Typical	3	5	5	5	Typical	11	23	23	23	Typical	9	22	22	22	Typical	5	7	7	7	Typical	5	7	7	7	Typical	4	4	4	4	Typical	9	16	16	16	Typical	13	33	33	33	Typical	10	20	20	20
tr|B6V9S8|B6V9S8_RABIT	CCT7	Chaperonin-containing T-complex polypeptide eta subunit OS=Oryctolagus cuniculus (Rabbit) PE=2 SV=1		Typical	3	5	5	5	Typical	16	24	24	24	Typical	11	16	16	16	Typical	6	7	7	7	Typical	5	5	5	5	Typical	4	6	6	6	Typical	11	15	15	15	Typical	19	35	35	35	Typical	17	27	27	27
tr|G1T8S9|G1T8S9_RABIT	DBR1	Uncharacterized protein OS=Oryctolagus cuniculus (Rabbit) GN=DBR1 PE=4 SV=2		Typical	4	5	5	5	Typical	5	6	6	6	Typical	4	4	4	4	Typical	4	5	5	5	Typical	1	1	1	1	Typical	1	3	3	3	Typical	2	3	3	3	Typical	2	4	4	4	Typical	3	4	4	4
tr|B7NZM4|B7NZM4_RABIT	DRG1	Developmentally regulated GTP binding protein 1 (Predicted) OS=Oryctolagus cuniculus (Rabbit) GN=DRG1 PE=4 SV=1		Typical	4	5	5	5	Typical	4	5	5	5	Typical	1	1	1	1	Typical	4	5	5	5	Typical	2	3	3	3	Typical	1	1	1	1	Typical	2	3	3	3	Typical	3	3	3	3	Typical	1	1	1	1
tr|D7R608|D7R608_RABIT	ELAVL1	ELAV-like protein OS=Oryctolagus cuniculus (Rabbit) GN=ELAVL1 PE=2 SV=1		Typical	4	5	5	5	Typical	5	5	5	5	Typical	2	2	2	2	Typical	2	2	2	2	Typical	3	5	5	5	Typical	2	3	3	3	Typical	4	6	6	6	Typical	4	5	5	5	Typical	3	3	3	3
tr|G1SRW4|G1SRW4_RABIT	EMILIN1	Uncharacterized protein OS=Oryctolagus cuniculus (Rabbit) GN=EMILIN1 PE=4 SV=1		Typical	3	5	5	5	Typical	2	2	2	2	Typical	2	2	2	2	Typical	1	1	1	1	Typical	1	1	1	1	Typical	1	2	2	2	Typical	2	2	2	2	Typical	1	1	1	1		0	0	0	0
tr|G1T1M9|G1T1M9_RABIT	HBS1L	Uncharacterized protein OS=Oryctolagus cuniculus (Rabbit) GN=HBS1L PE=4 SV=1		Typical	4	5	5	5	Typical	3	3	3	3	Typical	2	2	2	2		0	0	0	0	Typical	2	4	4	4		0	0	0	0	Typical	1	2	2	2	Typical	2	4	4	4	Typical	1	2	2	2
tr|G1T3Y8|G1T3Y8_RABIT	HSPD1	Uncharacterized protein OS=Oryctolagus cuniculus (Rabbit) GN=HSPD1 PE=3 SV=2		Typical	3	5	5	5	Typical	3	7	7	7	Typical	2	4	4	4	Typical	2	4	4	4	Typical	2	2	2	2	Typical	2	3	3	3	Typical	3	5	5	5	Typical	3	3	3	3	Typical	2	3	3	3
tr|B8K1C1|B8K1C1_RABIT	ITSN1	Intersectin 1 isoform ITSN-l (Predicted), 5 prime OS=Oryctolagus cuniculus (Rabbit) GN=ITSN1 PE=4 SV=1		Typical	3	5	5	5	Typical	7	7	7	7	Typical	7	10	10	10	Typical	6	9	9	9	Typical	4	5	5	5	Typical	3	3	3	3	Typical	6	7	7	7	Typical	7	9	9	9	Typical	3	3	3	3
tr|G1SHY2|G1SHY2_RABIT	KRT75	Uncharacterized protein OS=Oryctolagus cuniculus (Rabbit) GN=KRT75 PE=3 SV=1		Subset	4	5	0	0.0423737	Subset	1	1	0	0.00268097	Subset	2	2	0	0.0073758	Typical	8	24	1	2.12017	Subset	2	2	0	0.0073758	Subset	1	1	0	0.00268097	Subset	3	3	0	0.0120706	Subset	2	2	0	0.0073758	Subset	5	13	0	0.0549913
tr|G1SSX5|G1SSX5_RABIT	MARS	Uncharacterized protein OS=Oryctolagus cuniculus (Rabbit) GN=MARS PE=3 SV=2		Typical	5	5	5	5	Typical	4	5	5	5	Typical	4	4	4	4	Typical	5	6	6	6	Typical	4	5	5	5	Typical	2	2	2	2	Typical	7	13	13	13	Typical	8	13	13	13	Typical	8	10	10	10
tr|G1SJZ4|G1SJZ4_RABIT	OLA1	Obg-like ATPase 1 OS=Oryctolagus cuniculus (Rabbit) GN=OLA1 PE=3 SV=2		Typical	3	5	5	5	Typical	3	4	4	4	Typical	2	3	3	3	Typical	4	6	6	6	Typical	4	5	5	5	Typical	5	7	7	7	Typical	8	11	11	11	Typical	7	14	14	14	Typical	6	7	7	7
tr|G1SDF2|G1SDF2_RABIT	PCMT1	Protein-L-isoaspartate O-methyltransferase OS=Oryctolagus cuniculus (Rabbit) GN=PCMT1 PE=3 SV=2		Typical	4	5	5	5	Typical	4	5	5	5	Typical	3	3	3	3		0	0	0	0	Typical	2	3	3	3	Typical	3	4	4	4	Typical	3	6	6	6	Typical	6	10	10	10	Typical	6	10	10	10
tr|G1TUP1|G1TUP1_RABIT	PDCD6	Uncharacterized protein OS=Oryctolagus cuniculus (Rabbit) GN=PDCD6 PE=4 SV=1		Typical	3	5	5	5	Typical	2	2	2	2	Typical	1	2	2	2	Typical	2	3	3	3	Typical	2	2	2	2	Typical	3	3	3	3	Typical	2	2	2	2	Typical	1	1	1	1		0	0	0	0
tr|G1T9V7|G1T9V7_RABIT	SRP19	Uncharacterized protein OS=Oryctolagus cuniculus (Rabbit) GN=LOC100345569 PE=4 SV=1		Typical	3	5	5	5	Typical	3	5	5	5	Typical	3	5	5	5	Typical	2	4	4	4	Typical	2	2	2	2	Typical	1	2	2	2	Typical	2	2	2	2	Typical	2	2	2	2	Typical	1	1	1	1
sp|P23612|SYWC_RABIT	WARS	Tryptophan--tRNA ligase, cytoplasmic OS=Oryctolagus cuniculus (Rabbit) GN=WARS PE=2 SV=3		Typical	4	5	5	5	Typical	3	6	6	6	Typical	4	8	8	8	Typical	3	8	8	8	Typical	5	10	10	10	Typical	2	5	5	5	Typical	6	14	14	14	Typical	7	17	17	17	Typical	8	18	18	18
tr|G1SZD6|G1SZD6_RABIT	YWHAQ	14-3-3 protein theta OS=Oryctolagus cuniculus (Rabbit) GN=YWHAQ PE=3 SV=1		Subset	3	5	0	0.914381	Typical	4	6	3	3.31428	Sameset	5	9	4	4.72807	Sameset	4	6	4	4.10738	Sameset	6	9	3	3.78356	Subset	2	4	0	0.521176	Sameset	5	8	4	4.36797	Typical	4	7	3	3.36797	Typical	5	8	3	3.57487
tr|G1TKN7|G1TKN7_RABIT	ERH	Enhancer of rudimentary homolog OS=Oryctolagus cuniculus (Rabbit) GN=ERH PE=3 SV=1		Typical	3	5	5	5	Typical	3	4	4	4	Typical	3	3	3	3	Typical	4	8	8	8	Typical	4	6	6	6	Typical	2	3	3	3	Typical	3	7	7	7	Typical	2	2	2	2	Typical	2	4	4	4
sp|Q9TTC6|PPIA_RABIT	PPIA	Peptidyl-prolyl cis-trans isomerase A OS=Oryctolagus cuniculus (Rabbit) GN=PPIA PE=2 SV=3		Typical	4	5	3	4.21212	Typical	5	13	9	11.4242	Typical	5	7	3	5.42424	Typical	5	10	7	8.81818	Typical	4	7	5	6.21212	Typical	5	6	2	4.42424	Typical	6	20	14	17.6364	Typical	6	22	14	18.8485	Typical	6	33	23	29.0606
tr|G1T4Q9|G1T4Q9_RABIT	PSMB5	Proteasome subunit beta type OS=Oryctolagus cuniculus (Rabbit) GN=PSMB5 PE=3 SV=1		Typical	3	5	5	5	Typical	4	5	5	5	Typical	3	4	4	4	Typical	4	4	4	4	Typical	2	2	2	2	Typical	2	3	3	3	Typical	3	5	5	5	Typical	3	5	5	5	Typical	3	3	3	3
tr|G1SIA3|G1SIA3_RABIT	ASCC3	Uncharacterized protein OS=Oryctolagus cuniculus (Rabbit) GN=ASCC3 PE=4 SV=1		Typical	3	5	5	5	Typical	5	5	5	5		0	0	0	0		0	0	0	0		0	0	0	0	Typical	1	2	2	2	Typical	3	3	3	3		0	0	0	0		0	0	0	0
tr|G1TMD2|G1TMD2_RABIT	FCHO2	Uncharacterized protein OS=Oryctolagus cuniculus (Rabbit) GN=FCHO2 PE=4 SV=2		Typical	3	5	5	5	Typical	2	3	3	3	Typical	5	6	6	6	Typical	1	2	2	2	Typical	1	3	3	3	Typical	1	2	2	2	Typical	1	2	2	2	Typical	2	5	5	5	Typical	2	3	3	3
tr|G1SVE6|G1SVE6_RABIT	LSM12	Uncharacterized protein OS=Oryctolagus cuniculus (Rabbit) GN=LSM12 PE=4 SV=1		Typical	3	5	5	5	Typical	2	2	2	2	Typical	2	2	2	2		0	0	0	0	Typical	1	1	1	1	Typical	2	2	2	2		0	0	0	0	Typical	1	1	1	1		0	0	0	0
tr|G1SG29|G1SG29_RABIT		Uncharacterized protein OS=Oryctolagus cuniculus (Rabbit) GN=TCEB1 PE=4 SV=1		Typical	3	5	5	5	Typical	5	10	10	10	Typical	5	9	9	9	Typical	4	7	7	7	Typical	2	5	5	5	Typical	2	4	4	4	Typical	4	4	4	4	Typical	3	3	3	3	Typical	4	6	6	6
tr|G1SKT4|G1SKT4_RABIT	ATP5F1A	ATP synthase subunit alpha OS=Oryctolagus cuniculus (Rabbit) GN=ATP5A1 PE=3 SV=1		Typical	3	5	5	5	Typical	1	1	1	1		0	0	0	0		0	0	0	0		0	0	0	0		0	0	0	0		0	0	0	0		0	0	0	0		0	0	0	0
tr|G1TCT3|G1TCT3_RABIT	CAD	Uncharacterized protein OS=Oryctolagus cuniculus (Rabbit) GN=CAD PE=3 SV=2		Typical	3	4	4	4	Typical	2	3	3	3	Typical	4	6	6	6	Typical	2	3	3	3	Typical	2	2	2	2	Typical	2	2	2	2	Typical	1	1	1	1		0	0	0	0	Typical	1	1	1	1
tr|G1U9T8|G1U9T8_RABIT	CCT4	T-complex protein 1 subunit delta OS=Oryctolagus cuniculus (Rabbit) GN=CCT4 PE=3 SV=1		Typical	3	4	4	4	Typical	17	25	25	25	Typical	8	14	14	14	Typical	6	8	8	8	Typical	2	4	4	4	Typical	3	5	5	5	Typical	11	16	16	16	Typical	16	30	30	30	Typical	13	21	21	21
tr|G1TN86|G1TN86_RABIT	CUTA	Uncharacterized protein OS=Oryctolagus cuniculus (Rabbit) GN=CUTA PE=4 SV=1		Typical	2	4	4	4	Typical	1	4	4	4	Typical	2	5	5	5	Typical	1	2	2	2	Typical	1	2	2	2		0	0	0	0	Typical	1	2	2	2	Typical	1	1	1	1		0	0	0	0
tr|G1SRG3|G1SRG3_RABIT	DIS3	Uncharacterized protein OS=Oryctolagus cuniculus (Rabbit) GN=DIS3 PE=3 SV=1		Typical	4	4	4	4	Typical	10	12	12	12	Typical	9	14	14	14	Typical	8	9	9	9	Typical	4	6	6	6		0	0	0	0	Typical	8	11	11	11	Typical	8	8	8	8	Typical	10	11	11	11
tr|G1TJG6|G1TJG6_RABIT	GAPDH	Glyceraldehyde-3-phosphate dehydrogenase OS=Oryctolagus cuniculus (Rabbit) GN=GAPDH PE=3 SV=1		Typical	3	4	1	3.83333	Typical	3	5	2	4.83333	Typical	3	4	1	3.83333	Typical	3	6	2	5.77778	Typical	3	6	2	5.77778	Typical	2	3	1	2.88889	Typical	7	15	2	14.2778	Typical	8	18	4	17.2222	Typical	9	19	2	18.0556
tr|G1T647|G1T647_RABIT	GCLM	Uncharacterized protein OS=Oryctolagus cuniculus (Rabbit) GN=GCLM PE=4 SV=2		Typical	2	4	4	4		0	0	0	0	Typical	2	2	2	2	Typical	1	2	2	2		0	0	0	0	Typical	1	2	2	2		0	0	0	0	Typical	1	1	1	1	Typical	1	2	2	2
tr|G1SDT7|G1SDT7_RABIT	GEMIN2	Uncharacterized protein OS=Oryctolagus cuniculus (Rabbit) GN=GEMIN2 PE=4 SV=1		Typical	2	4	4	4	Typical	2	3	3	3	Typical	2	3	3	3	Typical	1	3	3	3	Typical	1	3	3	3	Typical	2	4	4	4	Typical	1	2	2	2	Typical	1	3	3	3	Typical	1	3	3	3
tr|G1T9S1|G1T9S1_RABIT	GEMIN6	Uncharacterized protein OS=Oryctolagus cuniculus (Rabbit) GN=GEMIN6 PE=4 SV=2		Typical	2	4	4	4	Typical	1	2	2	2	Typical	1	2	2	2	Typical	2	3	3	3	Typical	2	5	5	5	Typical	1	2	2	2	Typical	1	2	2	2	Typical	2	2	2	2	Typical	1	2	2	2
tr|G1T4R6|G1T4R6_RABIT	KRT16	Uncharacterized protein OS=Oryctolagus cuniculus (Rabbit) GN=KRT16 PE=3 SV=2		Subset	2	4	0	0.097479	Subset	2	3	0	0.0739496	Subset	2	4	0	0.097479	Typical	12	37	6	11.8192	Subset	2	7	0	0.171429	Subset	1	2	0	0.0504202	Typical	3	8	0	0.667958	Subset	2	5	0	0.122689	Typical	5	14	0	0.709943
tr|G1SDN2|G1SDN2_RABIT	KRT17	Uncharacterized protein OS=Oryctolagus cuniculus (Rabbit) GN=KRT17 PE=3 SV=1		Subset	2	4	0	0.0162465	Subset	2	3	0	0.0123249	Subset	2	4	0	0.0162465	Typical	7	21	1	2.54538	Subset	2	7	0	0.0285714	Subset	1	2	0	0.00840336	Subset	2	6	0	0.0243697	Subset	2	5	0	0.0204482	Subset	3	9	0	0.0353307
sp|Q29426|K2C3_RABIT	KRT3	Keratin, type II cytoskeletal 3 OS=Oryctolagus cuniculus (Rabbit) GN=KRT3 PE=2 SV=1		Typical	3	4	0	0		0	0	0	0		0	0	0	0	Typical	7	28	0	0		0	0	0	0		0	0	0	0	Subset	1	1	0	0	Subset	1	1	0	0	Subset	2	8	0	0
tr|G1U949|G1U949_RABIT	MAPRE1	Uncharacterized protein OS=Oryctolagus cuniculus (Rabbit) GN=MAPRE1 PE=4 SV=1		Typical	2	4	4	4	Typical	3	8	8	8	Typical	3	8	8	8	Typical	3	8	8	8	Typical	2	3	3	3	Typical	2	5	5	5	Typical	4	11	11	11	Typical	4	8	8	8	Typical	5	11	11	11
tr|G1SR25|G1SR25_RABIT	NAA50	Uncharacterized protein OS=Oryctolagus cuniculus (Rabbit) GN=NAA50 PE=4 SV=1		Typical	4	4	4	4	Typical	1	1	1	1		0	0	0	0	Typical	2	2	2	2	Typical	2	2	2	2		0	0	0	0	Typical	1	2	2	2		0	0	0	0	Typical	1	1	1	1
tr|G1TVT0|G1TVT0_RABIT	NCL	Uncharacterized protein OS=Oryctolagus cuniculus (Rabbit) GN=NCL PE=4 SV=1		Typical	3	4	4	4	Typical	4	4	4	4	Typical	2	3	3	3	Typical	3	3	3	3	Typical	3	4	4	4	Typical	1	1	1	1	Typical	4	4	4	4	Typical	3	3	3	3	Typical	2	2	2	2
tr|G1TE17|G1TE17_RABIT	PTBP2	Uncharacterized protein OS=Oryctolagus cuniculus (Rabbit) GN=PTBP2 PE=4 SV=1		Typical	1	4	4	4	Typical	1	4	4	4	Typical	1	4	4	4	Typical	1	4	4	4	Typical	1	4	4	4	Typical	1	4	4	4	Typical	1	4	4	4	Typical	1	5	5	5	Typical	1	4	4	4
tr|G1TFH0|G1TFH0_RABIT	R3HCC1	Uncharacterized protein OS=Oryctolagus cuniculus (Rabbit) GN=R3HCC1 PE=4 SV=2		Typical	2	4	4	4	Typical	3	7	7	7	Typical	3	6	6	6	Typical	3	7	7	7	Typical	3	7	7	7	Typical	3	7	7	7	Typical	3	6	6	6	Typical	3	7	7	7	Typical	2	4	4	4
tr|G1SMA9|G1SMA9_RABIT	RAB15	Uncharacterized protein OS=Oryctolagus cuniculus (Rabbit) GN=RAB15 PE=3 SV=1		Typical	1	4	4	4	Typical	1	4	4	4	Typical	1	2	2	2	Typical	1	4	4	4	Typical	1	4	4	4	Typical	1	1	1	1	Typical	1	4	4	4	Typical	1	4	4	4	Typical	1	4	4	4
tr|G1SWY0|G1SWY0_RABIT	RAB6A	Uncharacterized protein OS=Oryctolagus cuniculus (Rabbit) GN=RAB6A PE=3 SV=1		Typical	1	4	4	4	Typical	1	4	4	4	Typical	1	2	2	2	Typical	1	4	4	4	Typical	1	4	4	4	Typical	1	1	1	1	Typical	1	4	4	4	Typical	1	4	4	4	Typical	1	4	4	4
tr|G1TQS9|G1TQS9_RABIT	RRBP1	Uncharacterized protein OS=Oryctolagus cuniculus (Rabbit) GN=RRBP1 PE=4 SV=1		Typical	3	4	4	4	Typical	3	3	3	3	Typical	3	5	5	5	Typical	3	5	5	5	Typical	3	6	6	6	Typical	1	3	3	3	Typical	3	6	6	6	Typical	3	5	5	5	Typical	2	3	3	3
tr|G1TAF8|G1TAF8_RABIT	STIP1	Uncharacterized protein OS=Oryctolagus cuniculus (Rabbit) GN=STIP1 PE=4 SV=2		Typical	4	4	4	4	Typical	5	7	7	7	Typical	5	7	7	7	Typical	5	8	8	8	Typical	6	8	8	8	Typical	4	6	6	6	Typical	6	9	9	9	Typical	7	11	11	11	Typical	9	10	10	10
tr|B8K1B2|B8K1B2_RABIT	SYNJ1	Synaptojanin 1 isoform a (Predicted) OS=Oryctolagus cuniculus (Rabbit) GN=SYNJ1 PE=4 SV=1		Typical	4	4	4	4	Typical	4	4	4	4	Typical	4	4	4	4		0	0	0	0	Typical	1	1	1	1	Typical	2	2	2	2	Typical	2	2	2	2		0	0	0	0		0	0	0	0
tr|G1TMW2|G1TMW2_RABIT	TOLLIP	Uncharacterized protein OS=Oryctolagus cuniculus (Rabbit) GN=TOLLIP PE=4 SV=1		Typical	2	4	4	4	Typical	2	3	3	3	Typical	3	4	4	4	Typical	1	1	1	1	Typical	1	1	1	1	Typical	1	1	1	1	Typical	2	2	2	2	Typical	1	1	1	1	Typical	2	2	2	2
tr|G1SWE5|G1SWE5_RABIT	WDR61	Uncharacterized protein OS=Oryctolagus cuniculus (Rabbit) GN=WDR61 PE=4 SV=1		Typical	4	4	4	4	Typical	4	4	4	4	Typical	4	5	5	5	Typical	4	6	6	6	Typical	4	6	6	6	Typical	3	5	5	5	Typical	3	4	4	4	Typical	2	4	4	4	Typical	2	2	2	2
sp|P03988|IGHM_RABIT		Ig mu chain C region secreted form OS=Oryctolagus cuniculus (Rabbit) PE=2 SV=1		Typical	3	4	4	4	Typical	3	3	3	3	Typical	3	3	3	3	Typical	3	3	3	3		0	0	0	0	Typical	2	2	2	2		0	0	0	0		0	0	0	0		0	0	0	0
tr|G1TAY6|G1TAY6_RABIT	KRT19	Uncharacterized protein OS=Oryctolagus cuniculus (Rabbit) GN=KRT19 PE=3 SV=1		Subset	2	4	0	0	Subset	2	3	0	0	Subset	2	4	0	0	Subset	5	17	0	0	Subset	2	7	0	0	Subset	1	2	0	0	Sameset	3	8	0	0	Subset	2	5	0	0	Subset	3	9	0	0
tr|G1SKE3|G1SKE3_RABIT	LOC100351904	Uncharacterized protein OS=Oryctolagus cuniculus (Rabbit) GN=LOC100352401 PE=3 SV=1		Subset	3	4	0	0.277849		0	0	0	0	Subset	1	1	0	0.0328638	Typical	9	34	7	13.9114	Subset	1	1	0	0.0328638		0	0	0	0	Subset	2	2	0	0.0657277	Subset	1	1	0	0.0328638	Subset	3	10	0	0.328639
tr|G1TVD5|G1TVD5_RABIT		Uncharacterized protein OS=Oryctolagus cuniculus (Rabbit) PE=3 SV=1		Subset	2	4	0	0.0280992	Subset	4	5	0	0.138095	Typical	3	6	1	1.03034	Subset	3	4	0	0.129474	Subset	3	6	0	0.0864528	Subset	3	5	0	0.0842157	Subset	4	7	0	0.202832	Subset	4	6	0	0.140332	Subset	4	7	0	0.148953
tr|G1TKX0|G1TKX0_RABIT		Uncharacterized protein OS=Oryctolagus cuniculus (Rabbit) PE=4 SV=1		Typical	1	4	4	4	Typical	1	4	4	4	Typical	1	2	2	2	Typical	1	4	4	4	Typical	1	4	4	4	Typical	1	1	1	1	Typical	1	4	4	4	Typical	1	4	4	4	Typical	1	4	4	4
tr|G1T5X2|G1T5X2_RABIT	NCAPD3	Uncharacterized protein OS=Oryctolagus cuniculus (Rabbit) GN=NCAPD3 PE=4 SV=2		Typical	4	4	4	4	Typical	4	4	4	4	Typical	3	4	4	4	Typical	3	3	3	3	Typical	2	2	2	2	Typical	1	1	1	1	Typical	2	2	2	2	Typical	1	1	1	1	Typical	1	1	1	1
tr|G1TH86|G1TH86_RABIT	RAB11B	Uncharacterized protein OS=Oryctolagus cuniculus (Rabbit) GN=RAB11B PE=3 SV=2		Subset	2	4	0	0.615385	Subset	2	4	0	0.615385	Subset	2	2	0	0.307692	Subset	1	1	0	0.153846	Typical	2	3	1	1.30769	Subset	1	2	0	0.307692	Typical	4	5	1	1.61538	Subset	2	2	0	0.307692		0	0	0	0
tr|G1SNP4|G1SNP4_RABIT	THRAP3	Uncharacterized protein OS=Oryctolagus cuniculus (Rabbit) GN=THRAP3 PE=4 SV=1		Typical	2	4	4	4	Typical	4	6	6	6	Typical	4	6	6	6	Typical	2	4	4	4	Typical	4	5	5	5	Typical	1	1	1	1	Typical	3	5	5	5	Typical	1	1	1	1	Typical	1	2	2	2
tr|G1T2T9|G1T2T9_RABIT	RAB5A	Uncharacterized protein OS=Oryctolagus cuniculus (Rabbit) GN=RAB5A PE=3 SV=1		Typical	4	4	2	2.30769	Typical	2	4	0	0.615385		0	0	0	0		0	0	0	0	Typical	2	3	1	1.30769	Typical	1	1	1	1		0	0	0	0		0	0	0	0		0	0	0	0
tr|G1SI62|G1SI62_RABIT	PWP1	Uncharacterized protein OS=Oryctolagus cuniculus (Rabbit) GN=PWP1 PE=4 SV=1		Typical	4	4	4	4	Typical	2	2	2	2	Typical	2	2	2	2	Sameset	1	1	1	1	Sameset	1	1	1	1	Typical	1	1	1	1	Sameset	1	1	1	1	Typical	2	2	2	2	Sameset	1	1	1	1
tr|G1SQA8|G1SQA8_RABIT	ATP5F1B	ATP synthase subunit beta OS=Oryctolagus cuniculus (Rabbit) GN=ATP5B PE=3 SV=2		Typical	3	4	4	4	Typical	1	1	1	1		0	0	0	0		0	0	0	0	Typical	1	1	1	1	Typical	1	1	1	1		0	0	0	0		0	0	0	0		0	0	0	0
tr|G1SRF7|G1SRF7_RABIT	HSPA9	Uncharacterized protein OS=Oryctolagus cuniculus (Rabbit) GN=HSPA9 PE=3 SV=1		Typical	3	4	4	4	Typical	2	2	2	2	Typical	1	1	1	1	Typical	1	1	1	1	Typical	2	3	1	1.01166	Typical	1	1	1	1	Typical	1	1	1	1	Typical	2	2	1	1.00583		0	0	0	0
tr|G1TTN7|G1TTN7_RABIT	KIF2A	Kinesin-like protein OS=Oryctolagus cuniculus (Rabbit) GN=KIF2A PE=3 SV=2		Typical	2	4	4	4	Typical	1	2	2	2	Typical	1	3	3	3	Typical	1	2	2	2	Typical	1	1	1	1	Typical	1	2	2	2	Typical	1	2	2	2	Typical	1	2	2	2	Typical	1	1	1	1
tr|G1SL16|G1SL16_RABIT	SRSF7	Uncharacterized protein OS=Oryctolagus cuniculus (Rabbit) GN=SRSF7 PE=4 SV=2		Typical	2	4	4	4		0	0	0	0	Typical	1	2	2	2		0	0	0	0		0	0	0	0		0	0	0	0		0	0	0	0	Typical	1	1	1	1		0	0	0	0
sp|O18998|DNAS1_RABIT	DNASE1 DNL1			Typical	1	4	4	4	Typical	1	4	4	4	Typical	1	4	4	4	Typical	1	6	6	6	Typical	1	7	7	7	Typical	1	6	6	6	Typical	1	6	6	6	Typical	1	5	5	5	Typical	1	6	6	6
tr|G1U6B2|G1U6B2_RABIT	ALAD	Delta-aminolevulinic acid dehydratase OS=Oryctolagus cuniculus (Rabbit) GN=ALAD PE=3 SV=2		Typical	2	3	3	3	Typical	4	6	6	6	Typical	3	3	3	3	Typical	2	3	3	3	Typical	3	4	4	4	Typical	3	4	4	4	Typical	4	8	8	8	Typical	3	4	4	4	Typical	5	11	11	11
tr|G1SMK8|G1SMK8_RABIT	BAG2	Uncharacterized protein OS=Oryctolagus cuniculus (Rabbit) GN=BAG2 PE=4 SV=1		Typical	2	3	3	3	Typical	2	3	3	3	Typical	2	4	4	4	Typical	1	2	2	2		0	0	0	0	Typical	2	4	4	4		0	0	0	0		0	0	0	0	Typical	1	1	1	1
tr|G1T5N2|G1T5N2_RABIT	CCDC9	Uncharacterized protein OS=Oryctolagus cuniculus (Rabbit) GN=CCDC9 PE=4 SV=2		Typical	1	3	3	3	Typical	2	5	5	5	Typical	2	5	5	5	Typical	2	4	4	4	Typical	4	5	5	5	Typical	2	5	5	5	Typical	3	5	5	5	Typical	2	4	4	4	Typical	2	4	4	4
tr|G1TMS5|G1TMS5_RABIT	CCT5	Uncharacterized protein OS=Oryctolagus cuniculus (Rabbit) GN=CCT5 PE=3 SV=1		Typical	2	3	3	3	Typical	11	23	23	23	Typical	7	22	22	22	Typical	8	9	9	9	Typical	5	7	7	7	Typical	3	4	4	4	Typical	10	15	15	15	Typical	16	33	33	33	Typical	17	28	28	28
tr|G1SML9|G1SML9_RABIT	DNAJA1	Uncharacterized protein OS=Oryctolagus cuniculus (Rabbit) GN=DNAJA1 PE=3 SV=1		Typical	2	3	3	3	Typical	3	3	3	3	Typical	2	3	3	3	Typical	2	3	3	3	Typical	1	1	1	1		0	0	0	0	Typical	1	2	2	2	Typical	1	1	1	1		0	0	0	0
tr|G1T3U5|G1T3U5_RABIT	DNAJB4	Uncharacterized protein OS=Oryctolagus cuniculus (Rabbit) GN=DNAJB4 PE=4 SV=1		Typical	3	3	3	3	Typical	1	1	1	1	Typical	1	1	1	1	Typical	1	1	1	1	Typical	1	3	3	3		0	0	0	0	Typical	2	2	2	2	Typical	2	2	2	2		0	0	0	0
tr|G1SQT2|G1SQT2_RABIT	EDC4	Uncharacterized protein OS=Oryctolagus cuniculus (Rabbit) GN=EDC4 PE=4 SV=2		Typical	2	3	3	3	Typical	3	3	3	3	Typical	3	4	4	4	Typical	1	1	1	1	Typical	2	2	2	2	Typical	1	1	1	1		0	0	0	0	Typical	1	1	1	1		0	0	0	0
sp|O46638|FKBP3_RABIT	FKBP3 FKBP25	Peptidyl-prolyl cis-trans isomerase FKBP3 OS=Oryctolagus cuniculus (Rabbit) GN=FKBP3 PE=2 SV=2		Typical	2	3	3	3	Typical	2	2	2	2	Typical	2	2	2	2	Typical	3	4	4	4	Typical	1	1	1	1	Typical	2	2	2	2	Typical	6	10	10	10	Typical	4	5	5	5	Typical	2	2	2	2
tr|G1U9R6|G1U9R6_RABIT	FN1	Fibronectin OS=Oryctolagus cuniculus (Rabbit) GN=FN1 PE=4 SV=1		Typical	3	3	3	3	Typical	2	2	2	2		0	0	0	0	Typical	2	3	3	3	Typical	2	3	3	3	Typical	1	1	1	1	Typical	3	4	4	4	Typical	3	5	5	5	Typical	3	4	4	4
tr|G1SGK1|G1SGK1_RABIT	GIGYF2	Uncharacterized protein OS=Oryctolagus cuniculus (Rabbit) GN=GIGYF2 PE=4 SV=2		Typical	2	3	3	3	Typical	4	5	5	5	Typical	3	4	4	4	Typical	3	4	4	4	Typical	2	4	4	4	Typical	3	4	4	4	Typical	1	2	2	2	Typical	2	2	2	2	Typical	2	3	3	3
tr|G1SW00|G1SW00_RABIT	GLUL	Glutamine synthetase OS=Oryctolagus cuniculus (Rabbit) GN=GLUL PE=3 SV=2		Typical	2	3	3	3	Typical	5	6	6	6	Typical	3	5	5	5	Typical	3	6	6	6	Typical	4	6	6	6	Typical	3	4	4	4	Typical	4	7	7	7	Typical	3	4	4	4	Typical	7	17	17	17
tr|G1SPL5|G1SPL5_RABIT	MIB1	Uncharacterized protein OS=Oryctolagus cuniculus (Rabbit) GN=MIB1 PE=4 SV=1		Typical	2	3	3	3	Typical	2	2	2	2	Typical	2	2	2	2	Typical	1	1	1	1	Typical	2	2	2	2	Typical	2	3	3	3	Typical	1	1	1	1		0	0	0	0		0	0	0	0
tr|G1TDJ9|G1TDJ9_RABIT	RBMS1	Uncharacterized protein OS=Oryctolagus cuniculus (Rabbit) GN=RBMS1 PE=4 SV=2		Typical	2	3	3	3	Sameset	1	2	2	2	Typical	2	3	3	3	Sameset	1	1	1	1	Sameset	1	2	2	2	Sameset	1	2	2	2	Typical	3	4	4	4	Sameset	1	1	1	1	Sameset	1	1	1	1
tr|G1SQK0|G1SQK0_RABIT	STAU1	Uncharacterized protein OS=Oryctolagus cuniculus (Rabbit) GN=STAU1 PE=4 SV=2		Typical	2	3	3	3	Typical	3	4	4	4	Typical	2	2	2	2	Typical	4	5	5	5	Typical	2	2	2	2	Typical	3	8	8	8	Typical	3	4	4	4	Typical	1	1	1	1	Typical	1	1	1	1
tr|G1SLT0|G1SLT0_RABIT	TRIM38	Uncharacterized protein OS=Oryctolagus cuniculus (Rabbit) GN=TRIM38 PE=4 SV=2		Typical	2	3	3	3	Typical	2	2	2	2	Typical	2	2	2	2	Typical	1	1	1	1	Typical	2	4	4	4		0	0	0	0	Typical	1	1	1	1		0	0	0	0	Typical	1	1	1	1
tr|G1SCY3|G1SCY3_RABIT	UBR4	Uncharacterized protein OS=Oryctolagus cuniculus (Rabbit) GN=UBR4 PE=4 SV=1		Typical	3	3	3	3	Typical	3	3	3	3		0	0	0	0		0	0	0	0		0	0	0	0		0	0	0	0		0	0	0	0		0	0	0	0		0	0	0	0
sp|P40826|UBP14_RABIT	USP14 TGT	Ubiquitin carboxyl-terminal hydrolase 14 OS=Oryctolagus cuniculus (Rabbit) GN=USP14 PE=1 SV=3		Typical	3	3	3	3	Typical	4	6	6	6	Typical	4	4	4	4	Typical	5	5	5	5		0	0	0	0	Typical	2	3	3	3	Typical	1	1	1	1	Typical	8	10	10	10	Typical	5	7	7	7
sp|P07452|CAH1_RABIT	CA1	Carbonic anhydrase 1 OS=Oryctolagus cuniculus (Rabbit) GN=CA1 PE=2 SV=1		Subset	2	3	0	1.10526	Typical	4	9	2	4.57895	Subset	3	5	0	1.84211	Subset	2	3	0	1.10526	Subset	2	8	0	2.94737	Subset	3	7	0	2.57895	Typical	5	14	3	7.05263	Typical	5	17	7	10.6842	Typical	5	30	16	21.1579
tr|G1TLE3|G1TLE3_RABIT	LOC100348124	Phosphoglycerate kinase OS=Oryctolagus cuniculus (Rabbit) PE=3 SV=2		Typical	3	3	3	3	Typical	3	3	3	3	Typical	2	2	2	2	Typical	4	5	5	5	Typical	2	2	2	2		0	0	0	0	Typical	3	5	5	5	Typical	2	5	5	5	Typical	6	9	9	9
sp|O97572|RAB7A_RABIT	RAB7A RAB7	Ras-related protein Rab-7a OS=Oryctolagus cuniculus (Rabbit) GN=RAB7A PE=2 SV=1		Typical	3	3	3	3	Typical	1	1	1	1	Typical	2	2	2	2	Typical	2	3	3	3	Typical	2	3	3	3	Typical	2	2	2	2	Typical	3	4	4	4	Typical	3	4	4	4	Typical	2	2	2	2
tr|G1TMD8|G1TMD8_RABIT	PPP5C	Serine/threonine-protein phosphatase OS=Oryctolagus cuniculus (Rabbit) GN=PPP5C PE=3 SV=1		Typical	2	3	3	3	Typical	3	4	4	4	Typical	3	4	4	4	Typical	1	1	1	1	Typical	1	1	1	1	Typical	1	2	2	2	Typical	3	3	3	3	Typical	1	1	1	1	Typical	1	1	1	1
tr|U3KP85|U3KP85_RABIT	IFI35	Uncharacterized protein OS=Oryctolagus cuniculus (Rabbit) GN=IFI35 PE=4 SV=1		Typical	3	3	3	3	Typical	2	2	2	2	Typical	3	3	3	3	Typical	1	1	1	1		0	0	0	0		0	0	0	0		0	0	0	0		0	0	0	0	Sameset	2	2	2	2
tr|G1SXN3|G1SXN3_RABIT	LAMA4	Uncharacterized protein OS=Oryctolagus cuniculus (Rabbit) GN=LAMA4 PE=4 SV=2		Typical	1	3	3	3	Typical	1	2	2	2	Typical	1	2	2	2		0	0	0	0		0	0	0	0		0	0	0	0	Typical	1	2	2	2	Typical	1	1	1	1	Typical	1	1	1	1
tr|G1T860|G1T860_RABIT	MYO9B	Uncharacterized protein OS=Oryctolagus cuniculus (Rabbit) GN=MYO9B PE=4 SV=1		Typical	2	3	3	3	Typical	3	5	5	5	Typical	3	3	3	3	Typical	2	3	3	3	Typical	3	3	3	3	Typical	2	2	2	2	Typical	1	1	1	1	Typical	1	1	1	1	Typical	1	1	1	1
tr|G1SVQ4|G1SVQ4_RABIT	PIN4	Uncharacterized protein OS=Oryctolagus cuniculus (Rabbit) GN=PIN4 PE=4 SV=1		Typical	3	3	3	3	Typical	1	1	1	1	Typical	2	2	2	2	Typical	1	1	1	1	Typical	2	2	2	2		0	0	0	0	Typical	2	5	5	5	Typical	2	3	3	3	Typical	2	3	3	3
tr|G1SY68|G1SY68_RABIT	SF3B2	Uncharacterized protein OS=Oryctolagus cuniculus (Rabbit) GN=SF3B2 PE=4 SV=2		Typical	3	3	3	3		0	0	0	0	Typical	4	4	4	4	Typical	2	2	2	2	Typical	1	1	1	1	Typical	2	2	2	2	Typical	2	3	3	3		0	0	0	0		0	0	0	0
tr|G1TAL8|G1TAL8_RABIT		Uncharacterized protein OS=Oryctolagus cuniculus (Rabbit) PE=4 SV=2		Typical	3	3	3	3	Typical	2	4	4	4	Typical	2	2	2	2	Typical	1	1	1	1		0	0	0	0		0	0	0	0		0	0	0	0		0	0	0	0		0	0	0	0
tr|G1TT67|G1TT67_RABIT	LOC100357801	Uncharacterized protein OS=Oryctolagus cuniculus (Rabbit) GN=LOC100357801 PE=4 SV=2		Typical	3	3	3	3	Typical	8	8	8	8	Typical	7	7	7	7	Typical	6	7	7	7	Typical	6	8	8	8	Typical	2	2	2	2	Typical	1	1	1	1	Typical	1	1	1	1	Typical	3	3	3	3
sp|P46406|G3P_RABIT	GAPDH GAPD	Glyceraldehyde-3-phosphate dehydrogenase OS=Oryctolagus cuniculus (Rabbit) GN=GAPDH PE=1 SV=3		Subset	2	3	0	0.166667	Subset	2	3	0	0.166667	Subset	2	3	0	0.166667	Subset	2	4	0	0.222222	Subset	2	4	0	0.222222	Subset	1	2	0	0.111111	Subset	6	13	0	0.722222	Subset	7	14	0	0.777778	Typical	9	18	1	1.94444
tr|Q5YJI2|Q5YJI2_RABIT		Ras GTPase-activating-like protein IQGAP2 OS=Oryctolagus cuniculus (Rabbit) PE=2 SV=1		Typical	3	3	3	3	Sameset	4	5	5	5	Sameset	6	6	6	6	Typical	6	8	8	8	Typical	3	3	3	3	Typical	4	4	4	4	Typical	3	3	3	3	Typical	5	6	6	6	Sameset	1	1	1	1
tr|G1U6C5|G1U6C5_RABIT	KATNB1	Katanin p80 WD40 repeat-containing subunit B1 OS=Oryctolagus cuniculus (Rabbit) GN=KATNB1 PE=3 SV=2		Typical	3	3	3	3	Typical	2	3	3	3	Typical	4	7	7	7	Typical	4	7	7	7	Typical	3	6	6	6	Typical	1	1	1	1	Typical	3	5	5	5	Typical	2	5	5	5	Typical	2	4	4	4
tr|G1T8A8|G1T8A8_RABIT	RNF10	Uncharacterized protein OS=Oryctolagus cuniculus (Rabbit) GN=RNF10 PE=4 SV=1		Typical	2	3	3	3	Typical	3	4	4	4	Typical	5	6	6	6	Typical	3	5	5	5	Typical	4	9	9	9	Typical	4	7	7	7	Typical	2	2	2	2	Typical	1	1	1	1		0	0	0	0
tr|G1SUX5|G1SUX5_RABIT	PLCL2	Phosphoinositide phospholipase C OS=Oryctolagus cuniculus (Rabbit) GN=PLCL2 PE=4 SV=2		Typical	3	3	3	3	Typical	2	3	3	3	Typical	3	3	3	3	Typical	2	2	2	2	Typical	2	2	2	2		0	0	0	0		0	0	0	0		0	0	0	0		0	0	0	0
tr|G1T056|G1T056_RABIT	KATNA1	Katanin p60 ATPase-containing subunit A1 OS=Oryctolagus cuniculus (Rabbit) GN=KATNA1 PE=3 SV=2		Typical	3	3	3	3	Typical	3	3	3	3	Typical	3	4	4	4	Typical	2	2	2	2		0	0	0	0	Typical	1	1	1	1	Typical	1	1	1	1	Typical	2	2	2	2		0	0	0	0
tr|G1T7W2|G1T7W2_RABIT	RTRAF	Uncharacterized protein OS=Oryctolagus cuniculus (Rabbit) PE=4 SV=1		Typical	2	3	3	3	Typical	2	2	2	2	Typical	1	2	2	2	Typical	3	3	3	3	Typical	3	5	5	5	Typical	2	3	3	3	Typical	1	2	2	2	Typical	1	2	2	2	Typical	1	2	2	2
tr|G1TQ31|G1TQ31_RABIT	CSNK2A1	Casein kinase II subunit alpha OS=Oryctolagus cuniculus (Rabbit) GN=CSNK2A1 PE=4 SV=1		Typical	3	3	3	3	Typical	2	2	2	2	Typical	2	2	2	2	Typical	3	4	4	4	Typical	1	1	1	1	Typical	1	2	2	2		0	0	0	0		0	0	0	0		0	0	0	0
tr|G1T239|G1T239_RABIT	ATP6V0D1	Uncharacterized protein OS=Oryctolagus cuniculus (Rabbit) GN=ATP6V0D1 PE=4 SV=1		Typical	3	3	3	3	Typical	2	4	4	4	Typical	3	5	5	5	Typical	2	2	2	2	Typical	1	1	1	1	Typical	2	5	5	5		0	0	0	0		0	0	0	0		0	0	0	0
tr|G1SI79|G1SI79_RABIT	HNRNPA3	Uncharacterized protein OS=Oryctolagus cuniculus (Rabbit) GN=LOC100352496 PE=4 SV=1		Typical	2	3	3	3	Typical	1	1	1	1		0	0	0	0	Typical	1	2	2	2	Typical	1	2	2	2		0	0	0	0	Typical	2	5	5	5	Typical	2	5	5	5	Typical	2	5	5	5
tr|B8K135|B8K135_RABIT	HBZ_2			Subset	1	3	0	0	Subset	1	5	0	0	Subset	1	4	0	0	Subset	1	6	0	0	Subset	1	6	0	0	Subset	1	6	0	0	Typical	2	7	0	0	Typical	2	10	0	0	Typical	2	9	0	0
tr|G1TN20|G1TN20_RABIT	AQP1	Uncharacterized protein OS=Oryctolagus cuniculus (Rabbit) GN=AQP1 PE=3 SV=2		Typical	1	2	2	2	Typical	1	1	1	1	Typical	1	1	1	1	Typical	1	2	2	2	Typical	1	1	1	1		0	0	0	0	Typical	1	1	1	1		0	0	0	0		0	0	0	0
tr|G1T6P5|G1T6P5_RABIT	ARL8B	Uncharacterized protein OS=Oryctolagus cuniculus (Rabbit) GN=ARL8B PE=4 SV=1		Typical	2	2	2	2	Typical	2	2	2	2	Typical	1	1	1	1	Typical	1	2	2	2	Typical	1	2	2	2	Typical	2	2	2	2	Typical	2	2	2	2	Typical	1	2	2	2	Typical	2	2	2	2
tr|G1U0I7|G1U0I7_RABIT	ATXN2L	Uncharacterized protein OS=Oryctolagus cuniculus (Rabbit) GN=ATXN2L PE=4 SV=2		Typical	1	2	2	2	Typical	2	2	2	2	Typical	1	1	1	1	Typical	2	2	2	2	Typical	1	1	1	1		0	0	0	0		0	0	0	0		0	0	0	0		0	0	0	0
tr|G1SIB6|G1SIB6_RABIT	BLVRB	Uncharacterized protein OS=Oryctolagus cuniculus (Rabbit) GN=BLVRB PE=4 SV=2		Typical	2	2	2	2	Typical	2	4	4	4	Typical	2	2	2	2	Typical	1	5	5	5	Typical	1	3	3	3	Typical	2	4	4	4	Typical	3	9	9	9	Typical	4	11	11	11	Typical	5	13	13	13
tr|B2ZDY6|B2ZDY6_RABIT	CCT1	T-complex protein 1 subunit alpha OS=Oryctolagus cuniculus (Rabbit) PE=2 SV=1		Typical	2	2	2	2	Typical	13	24	24	24	Typical	12	16	16	16	Typical	6	8	8	8	Typical	5	7	7	7	Typical	3	4	4	4	Typical	12	27	27	27	Typical	14	34	34	34	Typical	15	30	30	30
tr|G1SEI1|G1SEI1_RABIT	CLASP2	Uncharacterized protein OS=Oryctolagus cuniculus (Rabbit) GN=CLASP2 PE=4 SV=2		Typical	2	2	2	2	Typical	1	1	1	1	Typical	2	2	2	2	Typical	1	1	1	1		0	0	0	0	Typical	1	1	1	1	Typical	1	1	1	1		0	0	0	0	Typical	1	1	1	1
tr|G1T868|G1T868_RABIT	CLTB	Uncharacterized protein OS=Oryctolagus cuniculus (Rabbit) GN=CLTB PE=4 SV=1		Typical	2	2	2	2	Typical	1	2	2	2	Typical	2	3	3	3	Typical	1	1	1	1		0	0	0	0		0	0	0	0	Typical	2	3	3	3		0	0	0	0	Typical	1	1	1	1
tr|G1SY91|G1SY91_RABIT	CNOT2	Uncharacterized protein OS=Oryctolagus cuniculus (Rabbit) GN=CNOT2 PE=4 SV=2		Typical	1	2	2	2		0	0	0	0		0	0	0	0		0	0	0	0		0	0	0	0	Typical	1	2	2	2		0	0	0	0		0	0	0	0		0	0	0	0
tr|G1T846|G1T846_RABIT	DARS	Uncharacterized protein OS=Oryctolagus cuniculus (Rabbit) GN=DARS PE=3 SV=2		Typical	2	2	2	2	Typical	3	4	4	4	Typical	1	2	2	2	Typical	3	4	4	4	Typical	2	3	3	3	Typical	1	1	1	1	Typical	6	9	9	9	Typical	4	7	7	7	Typical	1	3	3	3
tr|G1SMY1|G1SMY1_RABIT	DDX17	Uncharacterized protein OS=Oryctolagus cuniculus (Rabbit) GN=DDX17 PE=3 SV=2		Subset	1	2	0	0.0236967	Subset	1	3	0	0.035545	Typical	2	3	1	1.0237	Typical	2	5	1	1.04739	Subset	1	3	0	0.035545	Subset	1	1	0	0.0118483	Typical	2	3	1	1.0237	Typical	2	5	1	1.04739	Typical	2	3	1	1.0237
tr|G1U7I9|G1U7I9_RABIT	DDX39B	Uncharacterized protein OS=Oryctolagus cuniculus (Rabbit) GN=DDX39B PE=4 SV=1		Typical	2	2	2	2		0	0	0	0		0	0	0	0		0	0	0	0		0	0	0	0		0	0	0	0		0	0	0	0		0	0	0	0		0	0	0	0
tr|G1T047|G1T047_RABIT	DICER1	Uncharacterized protein OS=Oryctolagus cuniculus (Rabbit) GN=DICER1 PE=4 SV=1		Typical	2	2	2	2	Typical	2	2	2	2	Typical	3	3	3	3	Typical	2	2	2	2	Typical	5	5	5	5	Typical	3	4	4	4		0	0	0	0		0	0	0	0		0	0	0	0
tr|G1T8V4|G1T8V4_RABIT	DNAJB2	Uncharacterized protein OS=Oryctolagus cuniculus (Rabbit) GN=DNAJB2 PE=4 SV=2		Typical	1	2	2	2		0	0	0	0	Typical	1	1	1	1	Typical	1	1	1	1	Typical	1	2	2	2		0	0	0	0		0	0	0	0	Typical	1	1	1	1	Typical	1	1	1	1
tr|G1SKM2|G1SKM2_RABIT	FBN1	Uncharacterized protein OS=Oryctolagus cuniculus (Rabbit) GN=FBN1 PE=4 SV=1		Typical	1	2	2	2		0	0	0	0	Typical	2	2	2	2	Typical	1	1	1	1	Typical	1	1	1	1		0	0	0	0	Typical	1	1	1	1	Typical	1	1	1	1		0	0	0	0
sp|O62695|H2AV_RABIT	H2AFV H2AV	Histone H2A.V OS=Oryctolagus cuniculus (Rabbit) GN=H2AFV PE=2 SV=3		Typical	1	2	2	2		0	0	0	0	Typical	1	1	1	1		0	0	0	0	Typical	1	2	2	2		0	0	0	0	Typical	1	1	1	1	Typical	1	2	2	2	Typical	1	1	1	1
sp|O77768|HNRPC_RABIT	HNRNPC	Heterogeneous nuclear ribonucleoprotein C OS=Oryctolagus cuniculus (Rabbit) GN=HNRNPC PE=2 SV=1		Typical	2	2	2	2	Typical	2	3	3	3	Typical	1	1	1	1		0	0	0	0		0	0	0	0		0	0	0	0	Typical	2	2	2	2		0	0	0	0	Typical	1	1	1	1
tr|G1SLT8|G1SLT8_RABIT	HNRNPH3	Uncharacterized protein OS=Oryctolagus cuniculus (Rabbit) GN=HNRNPH3 PE=4 SV=1		Typical	2	2	2	2	Typical	1	1	1	1		0	0	0	0		0	0	0	0		0	0	0	0		0	0	0	0		0	0	0	0		0	0	0	0		0	0	0	0
tr|G1T7H0|G1T7H0_RABIT	HNRNPU	Uncharacterized protein OS=Oryctolagus cuniculus (Rabbit) GN=HNRNPU PE=4 SV=2		Typical	1	2	2	2	Typical	3	3	3	3	Typical	2	2	2	2	Typical	3	3	3	3	Typical	1	1	1	1	Typical	1	2	2	2	Typical	1	1	1	1	Typical	2	2	2	2	Typical	2	2	2	2
tr|G1TC48|G1TC48_RABIT	HNRNPUL1	Uncharacterized protein OS=Oryctolagus cuniculus (Rabbit) GN=HNRNPUL1 PE=4 SV=1		Typical	2	2	2	2	Typical	2	3	3	3	Typical	1	1	1	1		0	0	0	0		0	0	0	0		0	0	0	0	Typical	1	1	1	1		0	0	0	0	Typical	1	1	1	1
tr|G1T495|G1T495_RABIT	HSPA14	Uncharacterized protein OS=Oryctolagus cuniculus (Rabbit) GN=HSPA14 PE=3 SV=1		Typical	1	2	2	2	Typical	3	5	5	5	Typical	2	3	3	3	Typical	1	2	2	2	Typical	2	4	4	4	Typical	1	3	3	3	Typical	2	2	2	2	Typical	1	1	1	1	Typical	1	1	1	1
tr|G1T695|G1T695_RABIT	NAP1L1	Uncharacterized protein OS=Oryctolagus cuniculus (Rabbit) GN=NAP1L1 PE=3 SV=1		Typical	2	2	2	2	Typical	1	3	3	3	Typical	1	3	3	3	Typical	2	4	4	4	Typical	1	2	2	2	Typical	2	3	3	3	Typical	2	2	2	2	Typical	2	2	2	2	Typical	4	5	5	5
tr|G1SY38|G1SY38_RABIT	NCAPH	Condensin complex subunit 2 OS=Oryctolagus cuniculus (Rabbit) GN=NCAPH PE=3 SV=2		Typical	1	2	2	2	Typical	3	5	5	5	Typical	5	8	8	8	Typical	3	4	4	4	Typical	2	3	3	3	Typical	1	2	2	2	Typical	3	8	8	8	Typical	5	10	10	10	Typical	4	9	9	9
tr|G1SPW5|G1SPW5_RABIT	NFIA	Nuclear factor 1 OS=Oryctolagus cuniculus (Rabbit) GN=NFIA PE=3 SV=2		Typical	1	2	2	2	Typical	1	1	1	1	Typical	1	2	2	2	Typical	1	1	1	1	Typical	1	1	1	1		0	0	0	0		0	0	0	0		0	0	0	0		0	0	0	0
tr|G1TBQ5|G1TBQ5_RABIT	NUFIP2	Uncharacterized protein OS=Oryctolagus cuniculus (Rabbit) GN=NUFIP2 PE=4 SV=1		Typical	2	2	2	2	Typical	2	4	4	4	Typical	2	3	3	3	Typical	2	3	3	3	Typical	2	2	2	2	Typical	2	4	4	4	Typical	1	1	1	1	Typical	2	2	2	2		0	0	0	0
tr|G1TDH4|G1TDH4_RABIT	PRDX3	Uncharacterized protein OS=Oryctolagus cuniculus (Rabbit) GN=PRDX3 PE=4 SV=1		Typical	2	2	2	2	Typical	2	2	2	2	Typical	2	2	2	2		0	0	0	0	Typical	2	2	2	2	Typical	2	2	2	2	Typical	2	2	2	2	Typical	1	2	2	2	Typical	1	1	1	1
tr|G1SMI6|G1SMI6_RABIT	PRDX4			Typical	2	2	1	1.28169	Typical	2	4	3	3.28169	Typical	2	2	1	1.28169	Typical	2	4	2	2.56338	Typical	3	4	2	2.56338		0	0	0	0	Typical	2	5	4	4.28169	Typical	3	7	4	4.84507	Typical	3	6	3	3.84507
sp|Q95KK4|SSBP_RABIT	SSBP1 SSB	Single-stranded DNA-binding protein, mitochondrial OS=Oryctolagus cuniculus (Rabbit) GN=SSBP1 PE=2 SV=1		Typical	2	2	2	2		0	0	0	0		0	0	0	0	Typical	1	2	2	2	Typical	1	2	2	2	Typical	1	2	2	2		0	0	0	0		0	0	0	0		0	0	0	0
tr|G1TIR1|G1TIR1_RABIT	TNRC6B	Uncharacterized protein OS=Oryctolagus cuniculus (Rabbit) GN=TNRC6B PE=4 SV=2		Typical	2	2	2	2	Typical	1	1	1	1	Typical	2	3	3	3	Typical	4	4	4	4	Typical	3	3	3	3	Typical	1	1	1	1	Typical	5	6	6	6	Typical	3	4	4	4	Typical	1	1	1	1
tr|G1T7T6|G1T7T6_RABIT	USO1	Uncharacterized protein OS=Oryctolagus cuniculus (Rabbit) GN=USO1 PE=4 SV=1		Typical	1	2	2	2		0	0	0	0		0	0	0	0		0	0	0	0		0	0	0	0	Typical	1	1	1	1	Typical	1	1	1	1		0	0	0	0		0	0	0	0
tr|G1SU37|G1SU37_RABIT	USP10	Uncharacterized protein OS=Oryctolagus cuniculus (Rabbit) GN=USP10 PE=4 SV=1		Typical	2	2	2	2	Typical	2	3	3	3	Typical	4	5	5	5	Typical	5	7	7	7	Typical	2	4	4	4	Typical	1	2	2	2	Typical	3	3	3	3	Typical	1	1	1	1	Typical	2	2	2	2
tr|G1SXB8|G1SXB8_RABIT	AP1B1	AP complex subunit beta OS=Oryctolagus cuniculus (Rabbit) GN=AP1B1 PE=3 SV=2		Typical	2	2	1	1.0123	Typical	2	3	1	1.02459	Typical	2	2	1	1.0123	Typical	2	3	1	1.02459	Typical	3	3	2	2.0123		0	0	0	0	Subset	1	1	0	0.0122951		0	0	0	0		0	0	0	0
tr|G1SK48|G1SK48_RABIT	BLMH	Bleomycin hydrolase OS=Oryctolagus cuniculus (Rabbit) GN=BLMH PE=4 SV=2		Typical	2	2	2	2		0	0	0	0		0	0	0	0		0	0	0	0		0	0	0	0		0	0	0	0		0	0	0	0		0	0	0	0		0	0	0	0
sp|P01377|DEF4_RABIT		Corticostatin-4 OS=Oryctolagus cuniculus (Rabbit) PE=1 SV=2		Typical	2	2	2	2	Typical	2	2	1	1.63636		0	0	0	0		0	0	0	0	Typical	2	4	4	4		0	0	0	0		0	0	0	0		0	0	0	0		0	0	0	0
tr|G1TYA7|G1TYA7_RABIT	LDHB	L-lactate dehydrogenase OS=Oryctolagus cuniculus (Rabbit) GN=LDHB PE=3 SV=2		Typical	2	2	2	2	Typical	2	3	3	3		0	0	0	0		0	0	0	0		0	0	0	0	Typical	2	3	3	3	Typical	1	1	1	1	Typical	1	1	1	1	Typical	1	2	2	2
tr|G1T7Y7|G1T7Y7_RABIT	CAPZB	Uncharacterized protein OS=Oryctolagus cuniculus (Rabbit) GN=CAPZB PE=4 SV=1		Typical	2	2	2	2	Typical	2	3	3	3	Typical	1	1	1	1		0	0	0	0	Typical	1	1	1	1		0	0	0	0	Typical	1	1	1	1	Typical	1	1	1	1	Typical	2	4	4	4
tr|G1TAE4|G1TAE4_RABIT	DCAF7	Uncharacterized protein OS=Oryctolagus cuniculus (Rabbit) GN=DCAF7 PE=4 SV=1		Typical	2	2	2	2	Typical	1	1	1	1	Typical	1	1	1	1	Typical	1	1	1	1	Typical	2	2	2	2		0	0	0	0	Typical	1	1	1	1		0	0	0	0		0	0	0	0
tr|G1U7G0|G1U7G0_RABIT	LOC100339496	Uncharacterized protein OS=Oryctolagus cuniculus (Rabbit) GN=GEMIN8 PE=4 SV=1		Typical	2	2	2	2	Typical	2	2	2	2	Typical	2	2	2	2	Typical	1	2	2	2	Typical	1	2	2	2	Typical	1	1	1	1	Typical	1	1	1	1	Typical	1	1	1	1	Typical	1	1	1	1
tr|G1SSW2|G1SSW2_RABIT	STK26	Uncharacterized protein OS=Oryctolagus cuniculus (Rabbit) GN=LOC100343602 PE=4 SV=1		Typical	2	2	0	1.55556	Typical	4	5	1	4.11111	Typical	4	5	2	4.33333	Typical	2	3	2	2.77778	Typical	1	2	0	1.55556		0	0	0	0	Typical	1	1	1	1	Typical	2	4	1	3.33333	Typical	1	1	0	0.777778
tr|G1U8F6|G1U8F6_RABIT	LOC100349163	Uncharacterized protein OS=Oryctolagus cuniculus (Rabbit) GN=LOC100349163 PE=3 SV=1		Typical	1	2	2	2	Typical	1	2	2	2	Typical	1	3	3	3	Typical	1	3	3	3	Typical	1	3	3	3		0	0	0	0	Typical	1	3	3	3	Typical	1	2	2	2	Typical	1	2	2	2
tr|G1SEF8|G1SEF8_RABIT	NAPA	Uncharacterized protein OS=Oryctolagus cuniculus (Rabbit) GN=NAPA PE=4 SV=1		Typical	1	2	2	2		0	0	0	0		0	0	0	0		0	0	0	0		0	0	0	0	Typical	1	2	2	2		0	0	0	0		0	0	0	0		0	0	0	0
tr|G1T459|G1T459_RABIT	SETD3	Uncharacterized protein OS=Oryctolagus cuniculus (Rabbit) GN=SETD3 PE=4 SV=2		Typical	2	2	2	2		0	0	0	0		0	0	0	0		0	0	0	0		0	0	0	0		0	0	0	0		0	0	0	0		0	0	0	0		0	0	0	0
tr|G1SV79|G1SV79_RABIT	TOM1L1	Uncharacterized protein OS=Oryctolagus cuniculus (Rabbit) GN=TOM1L1 PE=4 SV=1		Typical	2	2	2	2	Typical	3	3	3	3	Typical	3	4	4	4	Typical	1	2	2	2	Typical	2	4	4	4	Typical	2	3	3	3	Typical	1	2	2	2	Typical	1	2	2	2	Typical	1	1	1	1
tr|G1SPJ5|G1SPJ5_RABIT	GCN1	Uncharacterized protein OS=Oryctolagus cuniculus (Rabbit) GN=GCN1 PE=4 SV=1		Typical	2	2	2	2	Typical	5	6	6	6	Typical	4	4	4	4	Typical	4	4	4	4	Typical	4	4	4	4	Typical	3	3	3	3	Typical	12	13	13	13	Typical	7	9	9	9	Typical	3	3	3	3
tr|G1U1M3|G1U1M3_RABIT	AIMP1	Uncharacterized protein OS=Oryctolagus cuniculus (Rabbit) GN=AIMP1 PE=4 SV=2		Typical	2	2	2	2	Typical	1	1	1	1		0	0	0	0	Typical	1	2	2	2	Typical	1	1	1	1		0	0	0	0	Typical	5	13	13	13	Typical	5	13	13	13	Typical	4	10	10	10
tr|G1TEQ0|G1TEQ0_RABIT	LOC100343444	Uncharacterized protein OS=Oryctolagus cuniculus (Rabbit) PE=4 SV=1		Sameset	2	2	2	2	Sameset	3	5	5	5		0	0	0	0	Sameset	2	4	4	4	Sameset	2	4	4	4	Sameset	2	2	2	2	Typical	4	10	10	10	Typical	3	7	7	7	Typical	4	6	6	6
tr|G1U840|G1U840_RABIT	STK24	Uncharacterized protein OS=Oryctolagus cuniculus (Rabbit) GN=STK24 PE=4 SV=1		Sameset	2	2	0	0.444444	Subset	3	4	0	0.888889	Typical	4	5	2	2.66667	Subset	1	1	0	0.222222	Sameset	1	2	0	0.444444		0	0	0	0		0	0	0	0	Subset	1	3	0	0.666667	Sameset	1	1	0	0.222222
tr|G1U8H8|G1U8H8_RABIT		Uncharacterized protein OS=Oryctolagus cuniculus (Rabbit) GN=RNF213 PE=4 SV=2		Typical	2	2	2	2	Typical	3	3	3	3	Typical	3	3	3	3		0	0	0	0	Typical	2	2	2	2		0	0	0	0		0	0	0	0	Typical	1	1	1	1		0	0	0	0
tr|G1SZN9|G1SZN9_RABIT	BTK	Tyrosine-protein kinase OS=Oryctolagus cuniculus (Rabbit) GN=BTK PE=3 SV=1		Typical	2	2	2	2	Typical	1	1	1	1		0	0	0	0		0	0	0	0		0	0	0	0		0	0	0	0	Typical	4	5	5	5		0	0	0	0		0	0	0	0
tr|G1SUC3|G1SUC3_RABIT	DCAF12	Uncharacterized protein OS=Oryctolagus cuniculus (Rabbit) GN=DCAF12 PE=4 SV=1		Typical	2	2	2	2	Typical	2	2	2	2	Typical	2	2	2	2	Typical	1	1	1	1	Typical	2	2	2	2	Typical	1	1	1	1		0	0	0	0		0	0	0	0		0	0	0	0
tr|G1THN7|G1THN7_RABIT		Uncharacterized protein OS=Oryctolagus cuniculus (Rabbit) PE=4 SV=1		Subset	1	2	0	0.00490196	Subset	2	3	0	0.00735294	Typical	3	5	1	1.0098	Subset	2	5	0	0.0122549	Subset	1	2	0	0.00490196	Subset	1	1	0	0.00245098	Subset	1	2	0	0.00490196	Subset	1	2	0	0.00490196	Subset	1	3	0	0.00735294
tr|G1SHK7|G1SHK7_RABIT	LAMTOR5	Uncharacterized protein OS=Oryctolagus cuniculus (Rabbit) GN=LAMTOR5 PE=4 SV=1		Typical	2	2	2	2	Typical	2	3	3	3	Typical	1	2	2	2	Typical	2	3	3	3		0	0	0	0	Typical	1	1	1	1	Typical	1	1	1	1	Typical	1	2	2	2		0	0	0	0
tr|G1SCS1|G1SCS1_RABIT	EXOC6	Uncharacterized protein OS=Oryctolagus cuniculus (Rabbit) GN=EXOC6 PE=4 SV=1		Typical	2	2	2	2	Typical	2	2	2	2	Typical	2	3	3	3	Typical	2	3	3	3	Typical	2	4	4	4	Typical	3	3	3	3	Typical	1	1	1	1	Typical	1	1	1	1		0	0	0	0
tr|G1SWD3|G1SWD3_RABIT	TFCP2	Uncharacterized protein OS=Oryctolagus cuniculus (Rabbit) GN=TFCP2 PE=4 SV=1		Typical	2	2	2	2	Typical	1	1	1	1		0	0	0	0		0	0	0	0		0	0	0	0		0	0	0	0		0	0	0	0		0	0	0	0		0	0	0	0
tr|G1ST49|G1ST49_RABIT	TCEA1	Uncharacterized protein OS=Oryctolagus cuniculus (Rabbit) GN=LOC100353663 PE=4 SV=1		Typical	2	2	2	2	Typical	2	2	2	2	Typical	2	3	3	3		0	0	0	0		0	0	0	0	Typical	2	3	3	3	Typical	3	5	5	5	Typical	2	2	2	2		0	0	0	0
sp|Q59I72|CTNA1_RABIT	CTNNA1	Catenin alpha-1 OS=Oryctolagus cuniculus (Rabbit) GN=CTNNA1 PE=3 SV=1		Typical	2	2	2	2	Typical	2	2	2	2		0	0	0	0	Typical	2	3	3	3	Typical	1	1	1	1	Typical	2	2	2	2	Typical	1	2	2	2	Typical	1	2	2	2		0	0	0	0
tr|G1SW88|G1SW88_RABIT	NFX1	Uncharacterized protein OS=Oryctolagus cuniculus (Rabbit) GN=NFX1 PE=4 SV=2		Typical	2	2	2	2	Typical	1	1	1	1		0	0	0	0		0	0	0	0		0	0	0	0		0	0	0	0		0	0	0	0		0	0	0	0		0	0	0	0
tr|G1SHA6|G1SHA6_RABIT	TRIP4	Uncharacterized protein OS=Oryctolagus cuniculus (Rabbit) GN=TRIP4 PE=4 SV=1		Typical	2	2	2	2	Typical	1	1	1	1	Typical	2	2	2	2		0	0	0	0		0	0	0	0		0	0	0	0		0	0	0	0		0	0	0	0		0	0	0	0
tr|G1SGB5|G1SGB5_RABIT	SFPQ	Uncharacterized protein OS=Oryctolagus cuniculus (Rabbit) GN=SFPQ PE=4 SV=1		Typical	2	2	2	2	Typical	1	1	1	1	Typical	1	1	1	1		0	0	0	0		0	0	0	0	Typical	1	1	1	1	Typical	1	1	1	1		0	0	0	0		0	0	0	0
tr|G1SLI7|G1SLI7_RABIT	FYCO1	Uncharacterized protein OS=Oryctolagus cuniculus (Rabbit) GN=FYCO1 PE=4 SV=1		Typical	2	2	2	2	Typical	1	1	1	1		0	0	0	0	Typical	1	1	1	1		0	0	0	0		0	0	0	0	Typical	2	2	2	2	Typical	2	2	2	2		0	0	0	0
tr|G1T6C0|G1T6C0_RABIT	RAB5B	Uncharacterized protein OS=Oryctolagus cuniculus (Rabbit) GN=RAB5B PE=3 SV=1		Subset	2	2	0	0.0769231	Sameset	2	4	0	0.153846	Typical	1	1	1	1		0	0	0	0	Subset	1	2	0	0.0769231		0	0	0	0		0	0	0	0		0	0	0	0		0	0	0	0
tr|G1T2W1|G1T2W1_RABIT	SRP72	Signal recognition particle subunit SRP72 OS=Oryctolagus cuniculus (Rabbit) GN=SRP72 PE=3 SV=2		Typical	2	2	2	2	Typical	1	1	1	1		0	0	0	0	Typical	1	1	1	1		0	0	0	0	Typical	1	2	2	2	Typical	1	2	2	2		0	0	0	0		0	0	0	0
tr|G1SMI4|G1SMI4_RABIT	RABEP1	Uncharacterized protein OS=Oryctolagus cuniculus (Rabbit) GN=RABEP1 PE=4 SV=2		Typical	2	2	2	2		0	0	0	0		0	0	0	0	Typical	1	1	1	1		0	0	0	0		0	0	0	0		0	0	0	0	Typical	1	1	1	1	Typical	1	1	1	1
tr|G1TNP7|G1TNP7_RABIT		Uncharacterized protein OS=Oryctolagus cuniculus (Rabbit) PE=4 SV=1		Subset	1	2	0	0.0745342	Subset	1	1	0	0.0372671		0	0	0	0	Typical	1	1	1	1	Typical	2	3	2	2.03727		0	0	0	0	Typical	2	2	1	1.03727	Typical	2	2	1	1.03727	Typical	1	1	1	1
tr|G1T4Z3|G1T4Z3_RABIT	EGLN1	Uncharacterized protein OS=Oryctolagus cuniculus (Rabbit) GN=EGLN1 PE=4 SV=1		Typical	1	2	2	2		0	0	0	0		0	0	0	0		0	0	0	0		0	0	0	0		0	0	0	0	Typical	1	1	1	1		0	0	0	0		0	0	0	0
tr|G1TP15|G1TP15_RABIT	PSMD3	Uncharacterized protein OS=Oryctolagus cuniculus (Rabbit) GN=PSMD3 PE=4 SV=2		Typical	2	2	2	2		0	0	0	0		0	0	0	0		0	0	0	0		0	0	0	0		0	0	0	0		0	0	0	0		0	0	0	0	Typical	1	1	1	1
tr|G1T920|G1T920_RABIT	SEPHS1	Uncharacterized protein OS=Oryctolagus cuniculus (Rabbit) GN=SEPHS1 PE=4 SV=1		Typical	1	2	2	2		0	0	0	0		0	0	0	0		0	0	0	0		0	0	0	0		0	0	0	0		0	0	0	0		0	0	0	0		0	0	0	0
tr|G1T9T9|G1T9T9_RABIT	DHX57	Uncharacterized protein OS=Oryctolagus cuniculus (Rabbit) GN=DHX57 PE=4 SV=2		Typical	2	2	0	0		0	0	0	0		0	0	0	0		0	0	0	0		0	0	0	0		0	0	0	0		0	0	0	0		0	0	0	0		0	0	0	0
tr|G1SPB6|G1SPB6_RABIT	ACSL1	Uncharacterized protein OS=Oryctolagus cuniculus (Rabbit) GN=ACSL1 PE=4 SV=2		Typical	1	1	1	1	Typical	1	1	1	1		0	0	0	0		0	0	0	0	Typical	1	1	1	1	Typical	1	1	1	1		0	0	0	0		0	0	0	0		0	0	0	0
sp|P00883|ALDOA_RABIT	ALDOA	Fructose-bisphosphate aldolase A OS=Oryctolagus cuniculus GN=ALDOA PE=1 SV=2		Typical	1	1	1	1	Typical	2	3	3	3	Typical	2	3	3	3	Typical	2	2	2	2	Typical	2	3	3	3	Typical	1	3	3	3	Typical	1	2	2	2	Typical	2	3	3	3	Typical	2	2	2	2
tr|G1SEJ4|G1SEJ4_RABIT	ATP6V1B2	Uncharacterized protein OS=Oryctolagus cuniculus (Rabbit) GN=ATP6V1B2 PE=3 SV=1		Typical	1	1	1	1	Typical	1	1	1	1	Typical	1	1	1	1	Typical	1	1	1	1		0	0	0	0	Typical	1	1	1	1	Typical	1	1	1	1	Typical	1	1	1	1		0	0	0	0
sp|P25230|CAP18_RABIT	CAP18	Antimicrobial protein CAP18 OS=Oryctolagus cuniculus (Rabbit) GN=CAP18 PE=1 SV=1		Typical	1	1	1	1	Typical	1	1	1	1	Typical	1	1	1	1	Typical	1	1	1	1	Typical	1	2	2	2	Typical	1	1	1	1		0	0	0	0		0	0	0	0		0	0	0	0
sp|Q09YN4|CAZA2_RABIT	CAPZA2	F-actin-capping protein subunit alpha-2 OS=Oryctolagus cuniculus (Rabbit) GN=CAPZA2 PE=3 SV=3		Typical	1	1	1	1		0	0	0	0		0	0	0	0		0	0	0	0	Typical	1	1	1	1	Typical	1	1	1	1	Typical	1	1	1	1		0	0	0	0		0	0	0	0
tr|G1TPN2|G1TPN2_RABIT	CDC37	Uncharacterized protein OS=Oryctolagus cuniculus (Rabbit) GN=CDC37 PE=1 SV=1		Typical	1	1	1	1	Typical	2	2	2	2	Typical	2	2	2	2	Typical	2	2	2	2	Typical	1	1	1	1	Typical	1	1	1	1		0	0	0	0	Typical	1	1	1	1	Typical	3	3	3	3
sp|P00563|KCRM_RABIT	CKM	Creatine kinase M-type OS=Oryctolagus cuniculus (Rabbit) GN=CKM PE=1 SV=1		Typical	1	1	1	1		0	0	0	0	Typical	1	1	1	1		0	0	0	0	Typical	2	2	2	2		0	0	0	0	Typical	4	5	5	5	Typical	3	3	3	3	Typical	2	3	3	3
tr|G1TUC2|G1TUC2_RABIT	CNBP	Uncharacterized protein OS=Oryctolagus cuniculus (Rabbit) GN=CNBP PE=4 SV=1		Typical	1	1	1	1	Typical	1	1	1	1	Typical	3	4	4	4		0	0	0	0	Typical	1	1	1	1	Typical	1	1	1	1		0	0	0	0		0	0	0	0		0	0	0	0
tr|G1SRE6|G1SRE6_RABIT	EPB41	Uncharacterized protein OS=Oryctolagus cuniculus (Rabbit) GN=EPB41 PE=4 SV=2		Typical	1	1	1	1	Typical	2	2	2	2	Typical	1	1	1	1		0	0	0	0		0	0	0	0	Typical	1	1	1	1		0	0	0	0		0	0	0	0	Typical	1	1	1	1
tr|G1SJQ2|G1SJQ2_RABIT	GLG1	Uncharacterized protein OS=Oryctolagus cuniculus (Rabbit) GN=GLG1 PE=4 SV=2		Typical	1	1	1	1	Typical	1	1	1	1	Typical	1	1	1	1		0	0	0	0		0	0	0	0		0	0	0	0		0	0	0	0	Typical	1	1	1	1		0	0	0	0
tr|G1TWL0|G1TWL0_RABIT	HNRNPA2B1	Uncharacterized protein OS=Oryctolagus cuniculus (Rabbit) GN=HNRNPA2B1 PE=4 SV=1		Typical	1	1	1	1		0	0	0	0		0	0	0	0	Typical	1	1	1	1	Typical	1	1	1	1		0	0	0	0		0	0	0	0	Typical	1	1	1	1		0	0	0	0
tr|G1T9F3|G1T9F3_RABIT	KPNB1	Uncharacterized protein OS=Oryctolagus cuniculus (Rabbit) GN=KPNB1 PE=4 SV=2		Typical	1	1	1	1	Typical	1	1	1	1		0	0	0	0	Typical	1	1	1	1	Typical	2	2	2	2	Typical	1	1	1	1	Typical	3	3	3	3	Typical	3	3	3	3	Typical	3	3	3	3
sp|P16973|LYSC_RABIT	LYZ	Lysozyme C OS=Oryctolagus cuniculus (Rabbit) GN=LYZ PE=1 SV=1		Typical	1	1	1	1		0	0	0	0		0	0	0	0	Typical	1	1	1	1		0	0	0	0		0	0	0	0		0	0	0	0	Typical	2	2	2	2	Typical	1	1	1	1
tr|G1TWG5|G1TWG5_RABIT	NAA30	Uncharacterized protein OS=Oryctolagus cuniculus (Rabbit) GN=NAA30 PE=4 SV=2		Typical	1	1	1	1	Typical	1	1	1	1		0	0	0	0		0	0	0	0		0	0	0	0		0	0	0	0	Typical	1	1	1	1		0	0	0	0		0	0	0	0
tr|G1SEI4|G1SEI4_RABIT	NMI	Uncharacterized protein OS=Oryctolagus cuniculus (Rabbit) GN=NMI PE=4 SV=2		Typical	1	1	1	1	Typical	2	3	3	3	Typical	3	5	5	5		0	0	0	0		0	0	0	0		0	0	0	0	Typical	2	2	2	2	Typical	2	2	2	2	Typical	1	1	1	1
tr|G1SKZ3|G1SKZ3_RABIT	PCNA	Proliferating cell nuclear antigen OS=Oryctolagus cuniculus (Rabbit) GN=PCNA PE=3 SV=1		Typical	1	1	1	1		0	0	0	0		0	0	0	0		0	0	0	0		0	0	0	0		0	0	0	0		0	0	0	0		0	0	0	0	Typical	1	1	1	1
tr|G1SFH0|G1SFH0_RABIT	PDCD2L	Uncharacterized protein OS=Oryctolagus cuniculus (Rabbit) GN=PDCD2L PE=4 SV=1		Typical	1	1	1	1	Typical	1	1	1	1	Typical	1	1	1	1		0	0	0	0		0	0	0	0		0	0	0	0		0	0	0	0		0	0	0	0		0	0	0	0
sp|P00511|PFKAM_RABIT	PFKM	ATP-dependent 6-phosphofructokinase, muscle type OS=Oryctolagus cuniculus (Rabbit) GN=PFKM PE=1 SV=3		Typical	1	1	1	1	Typical	2	3	3	3	Typical	2	3	3	3	Typical	1	1	1	1		0	0	0	0		0	0	0	0	Typical	1	1	1	1	Typical	2	3	2	2.6087	Typical	3	4	3	3.6087
tr|G1U522|G1U522_RABIT	PRKAR2A	Uncharacterized protein OS=Oryctolagus cuniculus (Rabbit) GN=PRKAR2A PE=4 SV=2		Typical	1	1	1	1		0	0	0	0		0	0	0	0		0	0	0	0		0	0	0	0		0	0	0	0	Typical	1	1	1	1		0	0	0	0	Typical	1	1	1	1
tr|G1SDA8|G1SDA8_RABIT	PSMA1	Uncharacterized protein OS=Oryctolagus cuniculus (Rabbit) GN=PSMA1 PE=4 SV=2		Typical	1	1	1	1	Typical	1	1	1	1	Typical	1	1	1	1		0	0	0	0		0	0	0	0	Typical	1	1	1	1		0	0	0	0	Typical	1	1	1	1		0	0	0	0
tr|G1SU71|G1SU71_RABIT	PSMB1	Proteasome subunit beta type OS=Oryctolagus cuniculus (Rabbit) GN=PSMB1 PE=3 SV=1		Typical	1	1	1	1	Typical	1	1	1	1	Typical	2	2	2	2	Typical	2	2	2	2	Typical	2	2	2	2		0	0	0	0	Typical	2	2	2	2	Typical	1	2	2	2	Typical	3	4	4	4
tr|G1TAH7|G1TAH7_RABIT	TKT	Transketolase OS=Oryctolagus cuniculus (Rabbit) GN=TKT PE=3 SV=2		Typical	1	1	1	1	Typical	3	3	3	3	Typical	1	1	1	1	Typical	1	1	1	1	Typical	2	2	2	2	Typical	2	3	3	3	Typical	2	3	3	3	Typical	2	3	3	3	Typical	4	6	6	6
tr|G1TP25|G1TP25_RABIT	UBAP2L	Uncharacterized protein OS=Oryctolagus cuniculus (Rabbit) GN=UBAP2L PE=4 SV=1		Typical	1	1	1	1	Typical	2	2	2	2	Typical	3	3	3	3	Typical	4	7	7	7	Typical	2	4	4	4		0	0	0	0	Typical	3	3	3	3	Typical	2	2	2	2	Typical	1	1	1	1
tr|G1T7U4|G1T7U4_RABIT	USP15	Uncharacterized protein OS=Oryctolagus cuniculus (Rabbit) GN=USP15 PE=4 SV=1		Typical	1	1	1	1	Typical	2	2	2	2	Typical	3	3	3	3		0	0	0	0		0	0	0	0		0	0	0	0		0	0	0	0		0	0	0	0	Typical	3	3	3	3
tr|G1T5Z3|G1T5Z3_RABIT	LOC100350608	Malignant T-cell-amplified sequence OS=Oryctolagus cuniculus (Rabbit) GN=LOC100350608 PE=3 SV=1		Typical	1	1	1	1	Typical	1	2	2	2	Typical	1	1	1	1		0	0	0	0		0	0	0	0	Typical	1	2	2	2	Typical	1	2	2	2	Typical	1	1	1	1	Typical	1	1	1	1
sp|P27124|FKBP4_RABIT	FKBP4 P59	Peptidyl-prolyl cis-trans isomerase FKBP4 OS=Oryctolagus cuniculus (Rabbit) GN=FKBP4 PE=1 SV=3		Typical	1	1	1	1	Typical	2	3	3	3		0	0	0	0	Typical	2	3	3	3	Typical	1	2	2	2		0	0	0	0		0	0	0	0	Typical	2	3	3	3	Typical	4	4	4	4
tr|G1TIB3|G1TIB3_RABIT	DBNL	Uncharacterized protein OS=Oryctolagus cuniculus (Rabbit) GN=DBNL PE=4 SV=1		Typical	1	1	1	1	Typical	1	1	1	1		0	0	0	0		0	0	0	0	Typical	1	1	1	1		0	0	0	0		0	0	0	0		0	0	0	0	Typical	1	1	1	1
tr|G1SF06|G1SF06_RABIT	EHD3	Uncharacterized protein OS=Oryctolagus cuniculus (Rabbit) GN=EHD3 PE=4 SV=1		Typical	1	1	1	1	Typical	2	2	2	2		0	0	0	0	Typical	1	1	1	1	Typical	1	1	1	1		0	0	0	0		0	0	0	0	Typical	2	2	1	1.63636	Typical	1	1	1	1
tr|G1TA48|G1TA48_RABIT	EHD4	Uncharacterized protein OS=Oryctolagus cuniculus (Rabbit) GN=EHD4 PE=4 SV=1		Typical	1	1	1	1	Typical	1	2	2	2		0	0	0	0		0	0	0	0		0	0	0	0		0	0	0	0	Typical	1	1	1	1	Subset	1	1	0	0.363636		0	0	0	0
tr|G1SV41|G1SV41_RABIT	FN3K	Uncharacterized protein OS=Oryctolagus cuniculus (Rabbit) GN=FN3K PE=4 SV=1		Typical	1	1	1	1	Typical	1	1	1	1	Typical	1	1	1	1		0	0	0	0		0	0	0	0	Typical	1	1	1	1		0	0	0	0	Typical	1	1	1	1	Typical	1	1	1	1
tr|G1SYN9|G1SYN9_RABIT	HDAC6	Uncharacterized protein OS=Oryctolagus cuniculus (Rabbit) GN=HDAC6 PE=4 SV=2		Typical	1	1	1	1	Typical	1	2	2	2	Typical	2	2	2	2		0	0	0	0		0	0	0	0	Typical	1	1	1	1		0	0	0	0		0	0	0	0		0	0	0	0
tr|G1SN83|G1SN83_RABIT	LAMB2	Uncharacterized protein OS=Oryctolagus cuniculus (Rabbit) GN=LAMB2 PE=4 SV=1		Typical	1	1	1	1	Typical	1	1	1	1	Typical	1	1	1	1	Typical	1	1	1	1		0	0	0	0		0	0	0	0	Typical	1	1	1	1	Typical	1	1	1	1		0	0	0	0
tr|G1SKE0|G1SKE0_RABIT	MAPRE2	Uncharacterized protein OS=Oryctolagus cuniculus (Rabbit) GN=MAPRE2 PE=4 SV=1		Typical	1	1	1	1	Typical	2	2	2	2	Typical	2	3	3	3	Typical	1	1	1	1	Typical	2	2	2	2	Typical	2	2	2	2	Typical	3	3	3	3	Typical	2	4	4	4	Typical	2	4	4	4
tr|G1TQV4|G1TQV4_RABIT	NECAP2	Uncharacterized protein OS=Oryctolagus cuniculus (Rabbit) GN=NECAP2 PE=4 SV=1		Typical	1	1	1	1		0	0	0	0	Typical	1	1	1	1		0	0	0	0	Typical	1	1	1	1		0	0	0	0		0	0	0	0		0	0	0	0		0	0	0	0
tr|G1TK32|G1TK32_RABIT		Uncharacterized protein OS=Oryctolagus cuniculus (Rabbit) GN=PFKL PE=4 SV=2		Typical	1	1	1	1	Typical	1	1	1	1	Typical	1	1	1	1		0	0	0	0		0	0	0	0		0	0	0	0		0	0	0	0	Typical	2	2	2	2	Typical	2	2	2	2
tr|G1SN21|G1SN21_RABIT	PNP	Uncharacterized protein OS=Oryctolagus cuniculus (Rabbit) GN=PNP PE=4 SV=1		Typical	1	1	1	1		0	0	0	0		0	0	0	0		0	0	0	0	Typical	1	1	1	1	Typical	1	1	1	1	Typical	2	2	2	2		0	0	0	0	Typical	3	3	3	3
tr|G1T096|G1T096_RABIT	SNRPF	Uncharacterized protein OS=Oryctolagus cuniculus (Rabbit) GN=SNRPF PE=4 SV=1		Typical	1	1	1	1	Typical	1	2	2	2		0	0	0	0		0	0	0	0	Typical	1	1	1	1	Typical	1	1	1	1	Typical	1	2	2	2	Typical	1	2	2	2	Typical	1	1	1	1
tr|G1T0B8|G1T0B8_RABIT	TUT7	Uncharacterized protein OS=Oryctolagus cuniculus (Rabbit) GN=ZCCHC6 PE=4 SV=2		Typical	1	1	1	1		0	0	0	0		0	0	0	0		0	0	0	0		0	0	0	0		0	0	0	0		0	0	0	0		0	0	0	0		0	0	0	0
tr|G1T9H0|G1T9H0_RABIT	FAM98A	Uncharacterized protein OS=Oryctolagus cuniculus (Rabbit) GN=FAM98A PE=4 SV=1		Typical	1	1	1	1	Typical	4	6	6	6	Typical	3	3	3	3	Typical	3	3	3	3	Typical	3	3	3	3	Typical	1	1	1	1	Typical	3	4	4	4	Typical	3	6	6	6	Typical	2	3	3	3
tr|G1TJW8|G1TJW8_RABIT	PLPBP PROSC	Uncharacterized protein OS=Oryctolagus cuniculus (Rabbit) GN=PROSC PE=3 SV=1		Typical	1	1	1	1	Typical	2	2	2	2	Typical	3	3	3	3	Typical	2	2	2	2	Typical	1	1	1	1		0	0	0	0	Typical	1	1	1	1	Typical	2	2	2	2	Typical	2	2	2	2
tr|G1SHR3|G1SHR3_RABIT	RUFY1	Uncharacterized protein OS=Oryctolagus cuniculus (Rabbit) GN=RUFY1 PE=4 SV=2		Typical	1	1	1	1	Typical	1	1	1	1	Typical	3	3	3	3	Typical	2	3	3	3		0	0	0	0	Typical	1	1	1	1	Typical	1	1	1	1		0	0	0	0	Typical	1	1	1	1
tr|G1T9L2|G1T9L2_RABIT	VPS36	Uncharacterized protein OS=Oryctolagus cuniculus (Rabbit) GN=VPS36 PE=4 SV=1		Typical	1	1	1	1		0	0	0	0		0	0	0	0		0	0	0	0		0	0	0	0		0	0	0	0	Typical	2	2	2	2	Typical	1	1	1	1		0	0	0	0
tr|G1T5R3|G1T5R3_RABIT	TCF25	Uncharacterized protein OS=Oryctolagus cuniculus (Rabbit) GN=TCF25 PE=4 SV=2		Typical	1	1	1	1	Typical	1	1	1	1		0	0	0	0	Typical	1	1	1	1		0	0	0	0	Typical	1	1	1	1		0	0	0	0		0	0	0	0		0	0	0	0
tr|G1SYQ5|G1SYQ5_RABIT	ARCN1	Uncharacterized protein OS=Oryctolagus cuniculus (Rabbit) GN=ARCN1 PE=4 SV=1		Typical	1	1	1	1		0	0	0	0	Typical	1	1	1	1	Typical	1	1	1	1		0	0	0	0	Typical	1	1	1	1		0	0	0	0	Typical	2	2	2	2		0	0	0	0
tr|G1SWW8|G1SWW8_RABIT	PPP1CC	Serine/threonine-protein phosphatase OS=Oryctolagus cuniculus (Rabbit) GN=PPP1CC PE=3 SV=1		Sameset	1	1	1	1	Sameset	1	1	1	1	Sameset	1	1	1	1		0	0	0	0		0	0	0	0		0	0	0	0	Typical	1	1	1	1	Typical	1	1	1	1		0	0	0	0
sp|Q9TT13|VDAC3_RABIT	VDAC3	Voltage-dependent anion-selective channel protein 3 OS=Oryctolagus cuniculus (Rabbit) GN=VDAC3 PE=2 SV=1		Typical	1	1	1	1	Typical	2	2	2	2		0	0	0	0		0	0	0	0		0	0	0	0	Typical	1	1	1	1		0	0	0	0		0	0	0	0		0	0	0	0
tr|G1U826|G1U826_RABIT	ATP6V1G1	Uncharacterized protein OS=Oryctolagus cuniculus (Rabbit) GN=ATP6V1G1 PE=4 SV=1		Sameset	1	1	1	1	Typical	2	2	2	2	Sameset	1	2	2	2		0	0	0	0		0	0	0	0	Sameset	1	2	2	2		0	0	0	0		0	0	0	0		0	0	0	0
tr|G1SFC9|G1SFC9_RABIT	NCAPH2	Uncharacterized protein OS=Oryctolagus cuniculus (Rabbit) GN=NCAPH2 PE=4 SV=1		Typical	1	1	1	1	Typical	1	1	1	1	Typical	1	1	1	1	Typical	1	1	1	1		0	0	0	0	Typical	1	1	1	1		0	0	0	0		0	0	0	0		0	0	0	0
tr|G1SGT0|G1SGT0_RABIT	LANCL2	Uncharacterized protein OS=Oryctolagus cuniculus (Rabbit) GN=LANCL2 PE=4 SV=1		Typical	1	1	1	1	Typical	1	2	2	2	Typical	1	1	1	1		0	0	0	0		0	0	0	0		0	0	0	0		0	0	0	0		0	0	0	0		0	0	0	0
tr|G1SCR0|G1SCR0_RABIT	LAMTOR1	Uncharacterized protein OS=Oryctolagus cuniculus (Rabbit) GN=LAMTOR1 PE=4 SV=1		Typical	1	1	1	1	Typical	1	1	1	1	Typical	2	2	2	2	Typical	1	1	1	1		0	0	0	0		0	0	0	0	Typical	1	1	1	1	Typical	1	1	1	1		0	0	0	0
sp|P67873|CSK2B_RABIT	CSNK2B CK2N	Casein kinase II subunit beta OS=Oryctolagus cuniculus (Rabbit) GN=CSNK2B PE=2 SV=1		Typical	1	1	1	1	Typical	1	1	1	1	Typical	1	1	1	1	Typical	2	3	3	3	Typical	2	2	2	2	Typical	2	2	2	2		0	0	0	0		0	0	0	0		0	0	0	0
tr|G1SFE9|G1SFE9_RABIT	AHSA1	Uncharacterized protein OS=Oryctolagus cuniculus (Rabbit) GN=AHSA1 PE=4 SV=1		Typical	1	1	1	1	Typical	2	2	2	2		0	0	0	0		0	0	0	0		0	0	0	0		0	0	0	0		0	0	0	0		0	0	0	0		0	0	0	0
tr|G1SMM7|G1SMM7_RABIT	SNRPD3	Uncharacterized protein OS=Oryctolagus cuniculus (Rabbit) GN=SNRPD3 PE=4 SV=1		Typical	1	1	1	1	Typical	2	2	2	2	Typical	1	1	1	1	Typical	1	2	2	2	Typical	2	3	3	3		0	0	0	0		0	0	0	0	Typical	1	1	1	1	Typical	1	1	1	1
tr|G1SIX5|G1SIX5_RABIT	EXOSC9	Uncharacterized protein OS=Oryctolagus cuniculus (Rabbit) GN=EXOSC9 PE=4 SV=1		Typical	1	1	1	1	Typical	2	2	2	2	Typical	2	2	2	2		0	0	0	0		0	0	0	0	Typical	1	1	1	1		0	0	0	0		0	0	0	0		0	0	0	0
tr|G1U7S4|G1U7S4_RABIT	PGAM2	Uncharacterized protein OS=Oryctolagus cuniculus (Rabbit) GN=PGAM2 PE=3 SV=1		Typical	1	1	1	1		0	0	0	0		0	0	0	0		0	0	0	0		0	0	0	0		0	0	0	0	Sameset	1	1	0	0.666667		0	0	0	0	Typical	2	2	1	1.66667
tr|G1T301|G1T301_RABIT	ZNF326	Uncharacterized protein OS=Oryctolagus cuniculus (Rabbit) GN=ZNF326 PE=4 SV=1		Typical	1	1	1	1	Typical	1	1	1	1	Typical	1	1	1	1	Typical	1	1	1	1		0	0	0	0	Typical	1	1	1	1		0	0	0	0		0	0	0	0		0	0	0	0
tr|G1SY30|G1SY30_RABIT	SNRNP200	Uncharacterized protein OS=Oryctolagus cuniculus (Rabbit) GN=SNRNP200 PE=4 SV=1		Typical	1	1	1	1		0	0	0	0	Typical	1	1	1	1		0	0	0	0		0	0	0	0	Typical	1	1	1	1		0	0	0	0		0	0	0	0		0	0	0	0
tr|G1STR7|G1STR7_RABIT	SPTA1	Uncharacterized protein OS=Oryctolagus cuniculus (Rabbit) GN=SPTA1 PE=4 SV=2		Typical	1	1	1	1		0	0	0	0	Typical	2	2	2	2	Typical	1	1	1	1		0	0	0	0		0	0	0	0		0	0	0	0		0	0	0	0		0	0	0	0
tr|G1T0U0|G1T0U0_RABIT		Uncharacterized protein OS=Oryctolagus cuniculus (Rabbit) GN=TIMM8A PE=4 SV=1		Typical	1	1	1	1	Typical	1	2	2	2	Typical	1	1	1	1		0	0	0	0	Typical	1	1	1	1	Typical	1	1	1	1	Typical	1	1	1	1	Typical	1	1	1	1		0	0	0	0
tr|G1TJ15|G1TJ15_RABIT	LOC100347836	Uncharacterized protein OS=Oryctolagus cuniculus (Rabbit) GN=LOC100347836 PE=4 SV=1		Typical	1	1	1	1	Typical	1	1	1	1		0	0	0	0		0	0	0	0	Typical	1	1	1	1		0	0	0	0		0	0	0	0		0	0	0	0		0	0	0	0
tr|G1SFP5|G1SFP5_RABIT	MAPKAP1	Uncharacterized protein OS=Oryctolagus cuniculus (Rabbit) GN=MAPKAP1 PE=4 SV=1		Typical	1	1	1	1		0	0	0	0		0	0	0	0		0	0	0	0		0	0	0	0		0	0	0	0		0	0	0	0		0	0	0	0		0	0	0	0
tr|G1TBF8|G1TBF8_RABIT	CIT	Uncharacterized protein OS=Oryctolagus cuniculus (Rabbit) GN=CIT PE=4 SV=1		Typical	1	1	1	1		0	0	0	0		0	0	0	0		0	0	0	0		0	0	0	0		0	0	0	0		0	0	0	0		0	0	0	0		0	0	0	0
tr|G1T3Z6|G1T3Z6_RABIT	PRKAR2B	Uncharacterized protein OS=Oryctolagus cuniculus (Rabbit) GN=PRKAR2B PE=4 SV=1		Typical	1	1	1	1		0	0	0	0	Typical	1	1	1	1		0	0	0	0		0	0	0	0		0	0	0	0		0	0	0	0		0	0	0	0		0	0	0	0
tr|A5HC45|A5HC45_RABIT		Cathepsin D OS=Oryctolagus cuniculus (Rabbit) PE=2 SV=1		Sameset	1	1	1	1		0	0	0	0		0	0	0	0		0	0	0	0		0	0	0	0		0	0	0	0	Typical	2	2	2	2		0	0	0	0	Typical	1	1	1	1
tr|G1SF19|G1SF19_RABIT	TMCC2	Uncharacterized protein OS=Oryctolagus cuniculus (Rabbit) GN=TMCC2 PE=4 SV=1		Typical	1	1	1	1	Typical	1	1	1	1	Typical	1	1	1	1	Typical	1	1	1	1		0	0	0	0		0	0	0	0		0	0	0	0	Typical	1	1	1	1		0	0	0	0
tr|G1SS33|G1SS33_RABIT	ATP6V1E1	Uncharacterized protein OS=Oryctolagus cuniculus (Rabbit) GN=ATP6V1E1 PE=3 SV=1		Typical	1	1	1	1		0	0	0	0		0	0	0	0		0	0	0	0		0	0	0	0		0	0	0	0		0	0	0	0		0	0	0	0		0	0	0	0
tr|G1T3M3|G1T3M3_RABIT	RAB21	Uncharacterized protein OS=Oryctolagus cuniculus (Rabbit) GN=RAB21 PE=3 SV=2		Typical	1	1	1	1		0	0	0	0		0	0	0	0		0	0	0	0		0	0	0	0		0	0	0	0		0	0	0	0		0	0	0	0		0	0	0	0
tr|G1T7P8|G1T7P8_RABIT	CNOT7	Uncharacterized protein OS=Oryctolagus cuniculus (Rabbit) GN=LOC100351543 PE=4 SV=1		Typical	1	1	1	1		0	0	0	0		0	0	0	0		0	0	0	0		0	0	0	0		0	0	0	0		0	0	0	0		0	0	0	0		0	0	0	0
tr|G1SZ35|G1SZ35_RABIT	CHMP3	Uncharacterized protein OS=Oryctolagus cuniculus (Rabbit) GN=CHMP3 PE=4 SV=1		Typical	1	1	1	1		0	0	0	0	Typical	1	1	1	1	Typical	1	1	1	1	Typical	1	1	1	1		0	0	0	0		0	0	0	0	Typical	1	1	1	1	Typical	1	1	1	1
tr|G1TTU6|G1TTU6_RABIT	SKP1	Uncharacterized protein OS=Oryctolagus cuniculus (Rabbit) GN=SKP1 PE=4 SV=1		Typical	1	1	1	1		0	0	0	0		0	0	0	0		0	0	0	0		0	0	0	0		0	0	0	0		0	0	0	0		0	0	0	0		0	0	0	0
tr|G1SEN2|G1SEN2_RABIT	GIT2	Uncharacterized protein OS=Oryctolagus cuniculus (Rabbit) GN=GIT2 PE=4 SV=1		Typical	1	1	1	1	Typical	1	1	1	1		0	0	0	0		0	0	0	0		0	0	0	0		0	0	0	0		0	0	0	0		0	0	0	0		0	0	0	0
tr|G1TGY9|G1TGY9_RABIT	VPS11	Uncharacterized protein OS=Oryctolagus cuniculus (Rabbit) GN=VPS11 PE=4 SV=2		Typical	1	1	1	1		0	0	0	0		0	0	0	0		0	0	0	0		0	0	0	0		0	0	0	0		0	0	0	0		0	0	0	0		0	0	0	0
tr|G1SRA9|G1SRA9_RABIT	ILK	Uncharacterized protein OS=Oryctolagus cuniculus (Rabbit) GN=ILK PE=4 SV=1		Typical	1	1	1	1	Typical	1	1	1	1		0	0	0	0		0	0	0	0	Typical	1	1	1	1		0	0	0	0	Typical	1	1	1	1		0	0	0	0		0	0	0	0
tr|G1TEU6|G1TEU6_RABIT	UBR2	Uncharacterized protein OS=Oryctolagus cuniculus (Rabbit) GN=UBR2 PE=4 SV=1		Typical	1	1	1	1		0	0	0	0		0	0	0	0		0	0	0	0		0	0	0	0		0	0	0	0		0	0	0	0		0	0	0	0		0	0	0	0
tr|G1TFB5|G1TFB5_RABIT	RAB18	Uncharacterized protein OS=Oryctolagus cuniculus (Rabbit) GN=RAB18 PE=3 SV=1		Typical	1	1	1	1		0	0	0	0		0	0	0	0		0	0	0	0		0	0	0	0		0	0	0	0		0	0	0	0		0	0	0	0		0	0	0	0
tr|G1SPM5|G1SPM5_RABIT	ACTR1A	Uncharacterized protein OS=Oryctolagus cuniculus (Rabbit) GN=ACTR1A PE=3 SV=1		Typical	1	1	1	1	Typical	1	2	2	2	Typical	1	1	1	1	Typical	1	1	1	1		0	0	0	0		0	0	0	0		0	0	0	0		0	0	0	0		0	0	0	0
tr|G1SPD2|G1SPD2_RABIT	PSMD5	Uncharacterized protein OS=Oryctolagus cuniculus (Rabbit) GN=PSMD5 PE=4 SV=1		Typical	1	1	1	1	Typical	1	1	1	1		0	0	0	0	Typical	1	1	1	1	Typical	1	1	1	1		0	0	0	0		0	0	0	0		0	0	0	0		0	0	0	0
tr|G1T5Q8|G1T5Q8_RABIT	STX12	Uncharacterized protein OS=Oryctolagus cuniculus (Rabbit) GN=STX12 PE=3 SV=1		Typical	1	1	1	1	Typical	1	1	1	1		0	0	0	0		0	0	0	0		0	0	0	0		0	0	0	0		0	0	0	0		0	0	0	0		0	0	0	0
sp|Q28740|BASI_RABIT	BSG	Basigin OS=Oryctolagus cuniculus (Rabbit) GN=BSG PE=2 SV=1		Typical	1	1	1	1		0	0	0	0		0	0	0	0		0	0	0	0	Typical	1	1	1	1		0	0	0	0		0	0	0	0		0	0	0	0		0	0	0	0
tr|G1T8S7|G1T8S7_RABIT	SYPL1	Uncharacterized protein OS=Oryctolagus cuniculus (Rabbit) GN=SYPL1 PE=4 SV=2		Typical	1	1	1	1		0	0	0	0		0	0	0	0		0	0	0	0	Typical	1	1	1	1		0	0	0	0		0	0	0	0		0	0	0	0		0	0	0	0
tr|G1SX90|G1SX90_RABIT	PIK3C3	Phosphatidylinositol 3-kinase OS=Oryctolagus cuniculus (Rabbit) GN=PIK3C3 PE=3 SV=2		Typical	1	1	1	1	Typical	1	1	1	1		0	0	0	0		0	0	0	0		0	0	0	0	Typical	1	1	1	1		0	0	0	0		0	0	0	0		0	0	0	0
tr|G1T6S4|G1T6S4_RABIT	DST	Uncharacterized protein OS=Oryctolagus cuniculus (Rabbit) GN=DST PE=4 SV=2		Typical	1	1	1	1		0	0	0	0		0	0	0	0		0	0	0	0		0	0	0	0		0	0	0	0		0	0	0	0		0	0	0	0		0	0	0	0
tr|G1SCG5|G1SCG5_RABIT	ELP3	Uncharacterized protein OS=Oryctolagus cuniculus (Rabbit) GN=ELP3 PE=4 SV=2		Typical	1	1	1	1		0	0	0	0		0	0	0	0		0	0	0	0		0	0	0	0		0	0	0	0		0	0	0	0		0	0	0	0		0	0	0	0
tr|G1SW24|G1SW24_RABIT	AARS	Uncharacterized protein OS=Oryctolagus cuniculus (Rabbit) GN=AARS PE=3 SV=1			0	0	0	0		0	0	0	0		0	0	0	0		0	0	0	0		0	0	0	0		0	0	0	0		0	0	0	0		0	0	0	0	Typical	2	3	3	3
tr|G1T4Z2|G1T4Z2_RABIT	ACLY	ATP-citrate synthase OS=Oryctolagus cuniculus (Rabbit) GN=ACLY PE=3 SV=2			0	0	0	0	Typical	7	8	8	8	Typical	3	3	3	3	Typical	3	3	3	3		0	0	0	0		0	0	0	0		0	0	0	0	Typical	4	5	5	5	Typical	1	1	1	1
tr|G1SZ94|G1SZ94_RABIT	AGFG1	Uncharacterized protein OS=Oryctolagus cuniculus (Rabbit) PE=4 SV=1			0	0	0	0		0	0	0	0	Typical	1	1	1	1	Typical	1	2	2	2		0	0	0	0		0	0	0	0		0	0	0	0	Typical	1	1	1	1	Typical	1	1	1	1
tr|G1TM29|G1TM29_RABIT	ALDH16A1	Uncharacterized protein OS=Oryctolagus cuniculus (Rabbit) GN=ALDH16A1 PE=4 SV=1			0	0	0	0	Typical	1	1	1	1		0	0	0	0		0	0	0	0		0	0	0	0		0	0	0	0	Typical	1	1	1	1	Typical	1	1	1	1		0	0	0	0
tr|G1SGG2|G1SGG2_RABIT	ARHGEF2	Uncharacterized protein OS=Oryctolagus cuniculus (Rabbit) GN=ARHGEF2 PE=4 SV=1			0	0	0	0	Typical	2	2	2	2	Typical	1	1	1	1		0	0	0	0		0	0	0	0		0	0	0	0		0	0	0	0		0	0	0	0		0	0	0	0
tr|G1SES9|G1SES9_RABIT	ATIC	Uncharacterized protein OS=Oryctolagus cuniculus (Rabbit) GN=ATIC PE=3 SV=1			0	0	0	0		0	0	0	0		0	0	0	0		0	0	0	0		0	0	0	0		0	0	0	0		0	0	0	0	Typical	1	1	1	1	Typical	2	2	2	2
tr|G1TA37|G1TA37_RABIT	BANF1	Uncharacterized protein OS=Oryctolagus cuniculus (Rabbit) GN=BANF1 PE=4 SV=1			0	0	0	0	Typical	1	1	1	1		0	0	0	0		0	0	0	0		0	0	0	0		0	0	0	0	Typical	1	1	1	1		0	0	0	0	Typical	1	1	1	1
sp|P07952|PMGE_RABIT	BPGM	Bisphosphoglycerate mutase OS=Oryctolagus cuniculus (Rabbit) GN=BPGM PE=2 SV=2			0	0	0	0		0	0	0	0		0	0	0	0	Typical	2	2	2	2	Typical	1	1	1	1		0	0	0	0	Typical	2	2	2	2	Typical	1	1	1	1	Typical	1	1	1	1
tr|G1SG83|G1SG83_RABIT	CAP2	Adenylyl cyclase-associated protein OS=Oryctolagus cuniculus (Rabbit) GN=CAP2 PE=3 SV=2			0	0	0	0		0	0	0	0		0	0	0	0		0	0	0	0		0	0	0	0		0	0	0	0	Typical	1	1	1	1	Typical	2	2	2	2		0	0	0	0
tr|G1SCI7|G1SCI7_RABIT	CBLN4				0	0	0	0	Typical	1	1	1	1		0	0	0	0	Typical	1	1	1	1		0	0	0	0	Typical	1	1	1	1		0	0	0	0		0	0	0	0		0	0	0	0
tr|G1SYB4|G1SYB4_RABIT	CDC42	Uncharacterized protein OS=Oryctolagus cuniculus (Rabbit) PE=3 SV=1			0	0	0	0		0	0	0	0		0	0	0	0		0	0	0	0		0	0	0	0		0	0	0	0		0	0	0	0		0	0	0	0	Typical	1	1	1	1
tr|G1T3Z5|G1T3Z5_RABIT	CDV3	Uncharacterized protein OS=Oryctolagus cuniculus (Rabbit) GN=CDV3 PE=4 SV=2			0	0	0	0		0	0	0	0		0	0	0	0	Typical	1	3	3	3		0	0	0	0	Typical	1	2	2	2	Typical	1	2	2	2	Typical	1	2	2	2	Typical	1	1	1	1
tr|B7NZS4|B7NZS4_RABIT	CNOT3				0	0	0	0	Typical	1	2	2	2		0	0	0	0	Typical	1	1	1	1		0	0	0	0		0	0	0	0		0	0	0	0		0	0	0	0	Typical	1	1	1	1
tr|G1U013|G1U013_RABIT	COPS3	Uncharacterized protein OS=Oryctolagus cuniculus (Rabbit) GN=COPS3 PE=4 SV=1			0	0	0	0	Typical	1	1	1	1	Typical	1	1	1	1	Typical	1	1	1	1	Typical	1	1	1	1	Typical	1	1	1	1	Typical	1	1	1	1	Typical	1	1	1	1	Typical	1	1	1	1
tr|G1TE83|G1TE83_RABIT	DCAF8	Uncharacterized protein OS=Oryctolagus cuniculus (Rabbit) GN=DCAF8 PE=4 SV=1			0	0	0	0		0	0	0	0		0	0	0	0	Typical	1	1	1	1		0	0	0	0		0	0	0	0		0	0	0	0		0	0	0	0		0	0	0	0
tr|G1SPT2|G1SPT2_RABIT	DDX6	Uncharacterized protein OS=Oryctolagus cuniculus (Rabbit) GN=DDX6 PE=3 SV=1			0	0	0	0		0	0	0	0		0	0	0	0		0	0	0	0	Typical	1	1	1	1		0	0	0	0	Typical	1	1	1	1		0	0	0	0		0	0	0	0
tr|G1SUK5|G1SUK5_RABIT	DENR	Density-regulated protein OS=Oryctolagus cuniculus (Rabbit) GN=DENR PE=3 SV=2			0	0	0	0	Typical	1	1	1	1	Typical	2	2	2	2		0	0	0	0		0	0	0	0		0	0	0	0	Typical	2	2	2	2		0	0	0	0		0	0	0	0
tr|G1T4V7|G1T4V7_RABIT	DSP	Uncharacterized protein OS=Oryctolagus cuniculus (Rabbit) GN=DSP PE=4 SV=2			0	0	0	0		0	0	0	0		0	0	0	0	Typical	2	2	2	2		0	0	0	0		0	0	0	0		0	0	0	0		0	0	0	0		0	0	0	0
tr|G1T0D8|G1T0D8_RABIT	DTD1	D-tyrosyl-tRNA(Tyr) deacylase OS=Oryctolagus cuniculus (Rabbit) GN=DTD1 PE=3 SV=1			0	0	0	0		0	0	0	0		0	0	0	0		0	0	0	0		0	0	0	0		0	0	0	0		0	0	0	0		0	0	0	0	Typical	1	1	1	1
tr|G1SKK1|G1SKK1_RABIT	DUT	Uncharacterized protein OS=Oryctolagus cuniculus (Rabbit) GN=DUT PE=4 SV=2			0	0	0	0		0	0	0	0		0	0	0	0		0	0	0	0		0	0	0	0		0	0	0	0		0	0	0	0		0	0	0	0	Typical	1	1	1	1
tr|G1TBW9|G1TBW9_RABIT	DYNLL2	Uncharacterized protein OS=Oryctolagus cuniculus (Rabbit) GN=DYNLL2 PE=4 SV=1			0	0	0	0		0	0	0	0	Typical	2	4	4	4	Sameset	1	2	2	2		0	0	0	0		0	0	0	0		0	0	0	0		0	0	0	0		0	0	0	0
tr|G1ST44|G1ST44_RABIT	EXOSC8	Uncharacterized protein OS=Oryctolagus cuniculus (Rabbit) GN=EXOSC8 PE=4 SV=1			0	0	0	0	Typical	2	2	2	2	Typical	2	2	2	2	Typical	1	1	1	1	Typical	1	1	1	1		0	0	0	0	Typical	1	1	1	1	Typical	1	1	1	1		0	0	0	0
tr|G1STW7|G1STW7_RABIT	FARSB	Uncharacterized protein OS=Oryctolagus cuniculus (Rabbit) GN=FARSB PE=4 SV=2			0	0	0	0		0	0	0	0		0	0	0	0		0	0	0	0		0	0	0	0		0	0	0	0		0	0	0	0	Typical	2	2	2	2	Typical	1	1	1	1
tr|G1SQI0|G1SQI0_RABIT	FUBP3	Uncharacterized protein OS=Oryctolagus cuniculus (Rabbit) GN=FUBP3 PE=4 SV=2			0	0	0	0		0	0	0	0	Typical	1	1	1	1		0	0	0	0		0	0	0	0		0	0	0	0		0	0	0	0		0	0	0	0		0	0	0	0
tr|G1SPZ7|G1SPZ7_RABIT	GPX1	Glutathione peroxidase OS=Oryctolagus cuniculus (Rabbit) GN=GPX1 PE=3 SV=1			0	0	0	0	Typical	1	2	2	2		0	0	0	0	Typical	1	1	1	1	Typical	2	2	2	2	Typical	1	1	1	1	Typical	2	3	3	3	Typical	1	1	1	1		0	0	0	0
tr|G1T1L4|G1T1L4_RABIT	GRWD1	Uncharacterized protein OS=Oryctolagus cuniculus (Rabbit) GN=GRWD1 PE=4 SV=1			0	0	0	0		0	0	0	0	Typical	1	1	1	1		0	0	0	0		0	0	0	0		0	0	0	0	Typical	1	1	1	1	Typical	1	1	1	1	Typical	1	1	1	1
tr|G1SMG5|G1SMG5_RABIT	GSPT1	Uncharacterized protein OS=Oryctolagus cuniculus (Rabbit) GN=GSPT1 PE=4 SV=1			0	0	0	0	Typical	1	1	1	1	Typical	1	2	2	2	Typical	2	2	2	2		0	0	0	0		0	0	0	0		0	0	0	0		0	0	0	0	Typical	1	1	1	1
tr|G1SVP7|G1SVP7_RABIT	GSTO1	Uncharacterized protein OS=Oryctolagus cuniculus (Rabbit) GN=GSTO1 PE=4 SV=1			0	0	0	0	Typical	1	1	1	1	Typical	1	1	1	1	Typical	1	1	1	1	Typical	1	2	2	2	Typical	1	1	1	1	Typical	2	5	5	5	Typical	2	5	5	5	Typical	4	6	6	6
tr|G1SP44|G1SP44_RABIT	GTPBP2	Uncharacterized protein OS=Oryctolagus cuniculus (Rabbit) GN=GTPBP2 PE=4 SV=1			0	0	0	0	Typical	2	2	2	2	Typical	1	1	1	1	Typical	1	1	1	1		0	0	0	0		0	0	0	0		0	0	0	0	Typical	1	1	1	1	Typical	2	2	2	2
tr|G1T8V6|G1T8V6_RABIT	HMBS	Uncharacterized protein OS=Oryctolagus cuniculus (Rabbit) GN=HMBS PE=3 SV=1			0	0	0	0	Typical	2	2	2	2		0	0	0	0	Typical	1	1	1	1	Typical	2	2	2	2	Typical	1	1	1	1	Typical	2	2	2	2	Typical	2	2	2	2	Typical	5	9	9	9
tr|G1TMU2|G1TMU2_RABIT	HNRNPF	Uncharacterized protein OS=Oryctolagus cuniculus (Rabbit) GN=HNRNPF PE=4 SV=1			0	0	0	0	Typical	1	1	1	1		0	0	0	0		0	0	0	0	Typical	2	2	2	2		0	0	0	0	Typical	1	2	2	2		0	0	0	0	Typical	1	1	1	1
tr|G1SHD9|G1SHD9_RABIT	IFRD2	Uncharacterized protein OS=Oryctolagus cuniculus (Rabbit) GN=IFRD2 PE=4 SV=1			0	0	0	0	Typical	2	2	2	2	Typical	1	1	1	1	Typical	4	6	6	6	Typical	3	3	3	3	Typical	3	5	5	5	Typical	2	2	2	2	Typical	1	2	2	2	Typical	2	3	3	3
tr|G1SKP2|G1SKP2_RABIT	IPO5	Uncharacterized protein OS=Oryctolagus cuniculus (Rabbit) GN=IPO5 PE=4 SV=1			0	0	0	0	Typical	1	1	1	1		0	0	0	0	Typical	1	1	1	1	Typical	1	1	1	1		0	0	0	0	Typical	3	4	4	4	Typical	3	5	5	5	Typical	2	3	3	3
tr|G1T2J0|G1T2J0_RABIT	JUP	Uncharacterized protein OS=Oryctolagus cuniculus (Rabbit) GN=JUP PE=4 SV=1			0	0	0	0		0	0	0	0		0	0	0	0	Typical	1	2	2	2		0	0	0	0		0	0	0	0		0	0	0	0		0	0	0	0		0	0	0	0
tr|G1TID8|G1TID8_RABIT	La (InterPro)	Uncharacterized protein OS=Oryctolagus cuniculus (Rabbit) PE=4 SV=1			0	0	0	0		0	0	0	0		0	0	0	0	Typical	2	3	3	3		0	0	0	0		0	0	0	0		0	0	0	0		0	0	0	0		0	0	0	0
tr|G1T7X6|G1T7X6_RABIT	LAMB1	Uncharacterized protein OS=Oryctolagus cuniculus (Rabbit) GN=LAMB1 PE=4 SV=2			0	0	0	0		0	0	0	0		0	0	0	0		0	0	0	0		0	0	0	0		0	0	0	0	Typical	1	1	1	1		0	0	0	0		0	0	0	0
tr|G1SMW3|G1SMW3_RABIT	LARP4B	Uncharacterized protein OS=Oryctolagus cuniculus (Rabbit) GN=LARP4B PE=4 SV=2			0	0	0	0		0	0	0	0		0	0	0	0	Typical	1	1	1	1	Typical	3	3	3	3	Typical	1	1	1	1	Typical	1	1	1	1		0	0	0	0	Typical	1	1	1	1
tr|G1TRW8|G1TRW8_RABIT	LCN2	Uncharacterized protein OS=Oryctolagus cuniculus (Rabbit) GN=LCN2 PE=3 SV=1			0	0	0	0		0	0	0	0		0	0	0	0		0	0	0	0		0	0	0	0		0	0	0	0		0	0	0	0		0	0	0	0	Typical	1	1	1	1
tr|G1U9Q1|G1U9Q1_RABIT	LSM5	Uncharacterized protein OS=Oryctolagus cuniculus (Rabbit) GN=LSM5 PE=4 SV=1			0	0	0	0	Typical	1	2	2	2	Typical	2	2	2	2	Typical	1	1	1	1	Typical	1	2	2	2	Typical	1	1	1	1	Typical	1	1	1	1	Typical	1	2	2	2	Typical	1	2	2	2
tr|G1SKS8|G1SKS8_RABIT	MAP4	Microtubule-associated protein OS=Oryctolagus cuniculus (Rabbit) GN=MAP4 PE=4 SV=2			0	0	0	0		0	0	0	0		0	0	0	0		0	0	0	0		0	0	0	0		0	0	0	0	Typical	1	1	1	1		0	0	0	0		0	0	0	0
tr|G1SL26|G1SL26_RABIT	MITD1	Uncharacterized protein OS=Oryctolagus cuniculus (Rabbit) GN=MITD1 PE=4 SV=1			0	0	0	0		0	0	0	0		0	0	0	0		0	0	0	0		0	0	0	0		0	0	0	0		0	0	0	0	Typical	2	4	4	4		0	0	0	0
tr|G1TTL1|G1TTL1_RABIT	NAA15	Uncharacterized protein OS=Oryctolagus cuniculus (Rabbit) GN=NAA15 PE=4 SV=1			0	0	0	0	Typical	1	1	1	1	Typical	1	1	1	1		0	0	0	0		0	0	0	0		0	0	0	0		0	0	0	0		0	0	0	0		0	0	0	0
tr|G1T753|G1T753_RABIT	NLE1	Uncharacterized protein OS=Oryctolagus cuniculus (Rabbit) GN=NLE1 PE=4 SV=2			0	0	0	0	Typical	2	2	2	2	Typical	1	1	1	1		0	0	0	0		0	0	0	0		0	0	0	0		0	0	0	0		0	0	0	0		0	0	0	0
tr|G1TLB8|G1TLB8_RABIT	OAS3	Uncharacterized protein OS=Oryctolagus cuniculus (Rabbit) GN=OAS3 PE=4 SV=1			0	0	0	0		0	0	0	0		0	0	0	0	Typical	2	3	3	3	Typical	2	3	3	3	Typical	1	2	2	2		0	0	0	0		0	0	0	0		0	0	0	0
tr|G1SEQ2|G1SEQ2_RABIT	PBDC1	Uncharacterized protein OS=Oryctolagus cuniculus (Rabbit) GN=PBDC1 PE=4 SV=2			0	0	0	0	Typical	2	2	2	2	Typical	1	1	1	1	Typical	1	1	1	1	Typical	1	2	2	2		0	0	0	0		0	0	0	0		0	0	0	0	Typical	1	1	1	1
tr|G1TCG0|G1TCG0_RABIT	PDCD4	Uncharacterized protein OS=Oryctolagus cuniculus (Rabbit) GN=PDCD4 PE=4 SV=1			0	0	0	0		0	0	0	0		0	0	0	0		0	0	0	0	Typical	1	2	2	2		0	0	0	0		0	0	0	0	Typical	1	1	1	1	Typical	1	2	2	2
sp|P47859|PFKAP_RABIT	PFKP	ATP-dependent 6-phosphofructokinase, platelet type OS=Oryctolagus cuniculus (Rabbit) GN=PFKP PE=1 SV=1			0	0	0	0	Typical	1	1	1	1	Typical	1	1	1	1		0	0	0	0		0	0	0	0		0	0	0	0	Typical	1	2	2	2	Typical	2	3	2	2.3913	Typical	2	4	3	3.3913
tr|G1SCM9|G1SCM9_RABIT	PLEKHF1				0	0	0	0		0	0	0	0		0	0	0	0		0	0	0	0	Typical	1	2	2	2		0	0	0	0		0	0	0	0		0	0	0	0		0	0	0	0
tr|G1SEN3|G1SEN3_RABIT	PLEKHF2	Uncharacterized protein OS=Oryctolagus cuniculus (Rabbit) GN=PLEKHF2 PE=4 SV=1			0	0	0	0	Typical	1	2	2	2	Typical	2	4	4	4	Typical	1	1	1	1		0	0	0	0		0	0	0	0		0	0	0	0		0	0	0	0		0	0	0	0
tr|G1SRB6|G1SRB6_RABIT	PPID	Uncharacterized protein OS=Oryctolagus cuniculus (Rabbit) GN=PPID PE=4 SV=1			0	0	0	0	Typical	2	3	3	3	Typical	2	2	2	2	Typical	2	3	3	3	Typical	1	2	2	2	Typical	1	1	1	1	Typical	1	2	2	2	Typical	3	4	4	4	Typical	4	5	5	5
tr|G1SZ14|G1SZ14_RABIT	PSMA3	Uncharacterized protein OS=Oryctolagus cuniculus (Rabbit) GN=PSMA3 PE=4 SV=2			0	0	0	0		0	0	0	0		0	0	0	0		0	0	0	0	Typical	1	1	1	1		0	0	0	0		0	0	0	0		0	0	0	0	Typical	1	1	1	1
tr|G1SWI7|G1SWI7_RABIT	PSMA8	Proteasome subunit alpha type OS=Oryctolagus cuniculus (Rabbit) GN=PSMA8 PE=3 SV=2			0	0	0	0		0	0	0	0	Typical	1	1	1	1		0	0	0	0		0	0	0	0		0	0	0	0		0	0	0	0	Typical	1	2	2	2	Typical	1	1	1	1
tr|B7NZD2|B7NZD2_RABIT	PSMD4	Proteasome 26S subunit, non-ATPase, 4 (Predicted) OS=Oryctolagus cuniculus (Rabbit) GN=PSMD4 PE=4 SV=1			0	0	0	0	Typical	2	3	3	3	Typical	1	1	1	1	Typical	3	5	5	5	Typical	2	3	3	3	Typical	1	1	1	1	Typical	1	1	1	1	Typical	2	2	2	2	Typical	2	3	3	3
tr|G1U115|G1U115_RABIT	PSMD6	Uncharacterized protein OS=Oryctolagus cuniculus (Rabbit) GN=PSMD6 PE=4 SV=1			0	0	0	0	Typical	1	1	1	1		0	0	0	0		0	0	0	0		0	0	0	0		0	0	0	0	Typical	1	1	1	1		0	0	0	0		0	0	0	0
tr|G1SME4|G1SME4_RABIT	RBM4	Uncharacterized protein OS=Oryctolagus cuniculus (Rabbit) GN=LOC100355015 PE=4 SV=1			0	0	0	0	Typical	1	1	1	1	Typical	1	1	1	1	Typical	1	1	1	1	Sameset	1	1	1	1		0	0	0	0	Typical	2	2	2	2	Sameset	1	1	1	1	Sameset	1	1	1	1
tr|G1TCH6|G1TCH6_RABIT	REPS1	Uncharacterized protein OS=Oryctolagus cuniculus (Rabbit) GN=REPS1 PE=4 SV=2			0	0	0	0	Typical	2	2	2	2	Typical	2	2	2	2	Typical	1	1	1	1	Typical	1	1	1	1	Typical	1	2	2	2		0	0	0	0		0	0	0	0		0	0	0	0
tr|G1SM50|G1SM50_RABIT	SF3B4	Uncharacterized protein OS=Oryctolagus cuniculus (Rabbit) GN=SF3B4 PE=4 SV=1			0	0	0	0	Typical	1	1	1	1	Typical	1	1	1	1	Typical	1	1	1	1	Typical	1	1	1	1		0	0	0	0	Typical	2	2	2	2	Typical	1	2	2	2	Typical	1	1	1	1
tr|G1SR41|G1SR41_RABIT	STMN1	Stathmin OS=Oryctolagus cuniculus (Rabbit) GN=STMN1 PE=3 SV=1			0	0	0	0		0	0	0	0		0	0	0	0	Typical	1	1	1	1	Typical	1	1	1	1		0	0	0	0	Typical	1	1	1	1		0	0	0	0	Typical	1	1	1	1
tr|G1TTM0|G1TTM0_RABIT	STMN2	Stathmin OS=Oryctolagus cuniculus (Rabbit) GN=STMN2 PE=3 SV=2			0	0	0	0		0	0	0	0		0	0	0	0	Typical	1	1	1	1	Typical	1	1	1	1		0	0	0	0	Typical	1	1	1	1		0	0	0	0	Typical	1	1	1	1
tr|G1SPG8|G1SPG8_RABIT	TARBP2	RISC-loading complex subunit TARBP2 OS=Oryctolagus cuniculus (Rabbit) GN=TARBP2 PE=3 SV=1			0	0	0	0		0	0	0	0		0	0	0	0		0	0	0	0	Typical	1	1	1	1		0	0	0	0		0	0	0	0		0	0	0	0		0	0	0	0
tr|G1SLL1|G1SLL1_RABIT	TJP1	Uncharacterized protein OS=Oryctolagus cuniculus (Rabbit) GN=TJP1 PE=4 SV=1			0	0	0	0	Typical	1	1	1	1		0	0	0	0		0	0	0	0		0	0	0	0		0	0	0	0		0	0	0	0		0	0	0	0		0	0	0	0
tr|G1SZP0|G1SZP0_RABIT	TOM1	Uncharacterized protein OS=Oryctolagus cuniculus (Rabbit) GN=TOM1 PE=4 SV=1			0	0	0	0	Typical	1	1	1	1	Typical	2	2	2	2		0	0	0	0		0	0	0	0	Typical	1	1	1	1	Typical	1	1	1	1	Typical	2	2	2	2	Typical	1	1	1	1
sp|P00939|TPIS_RABIT	TPI1	Triosephosphate isomerase OS=Oryctolagus cuniculus (Rabbit) GN=TPI1 PE=1 SV=1			0	0	0	0	Typical	3	4	4	4	Typical	2	2	2	2	Typical	2	2	2	2	Typical	3	3	3	3	Typical	1	1	1	1	Typical	4	4	4	4	Typical	3	3	3	3	Typical	5	5	5	5
tr|G1U7Q6|G1U7Q6_RABIT	TSN	Uncharacterized protein OS=Oryctolagus cuniculus (Rabbit) GN=TSN PE=4 SV=1			0	0	0	0		0	0	0	0	Typical	1	1	1	1	Typical	1	1	1	1	Typical	1	1	1	1	Typical	1	1	1	1		0	0	0	0		0	0	0	0	Typical	1	1	1	1
tr|G1SHU5|G1SHU5_RABIT	UBAP2	Uncharacterized protein OS=Oryctolagus cuniculus (Rabbit) GN=UBAP2 PE=4 SV=1			0	0	0	0		0	0	0	0		0	0	0	0	Typical	2	2	2	2		0	0	0	0		0	0	0	0		0	0	0	0		0	0	0	0		0	0	0	0
tr|G1T8X7|G1T8X7_RABIT	VCPIP1	Uncharacterized protein OS=Oryctolagus cuniculus (Rabbit) GN=VCPIP1 PE=4 SV=1			0	0	0	0	Typical	1	1	1	1	Typical	2	2	2	2	Typical	2	2	2	2		0	0	0	0		0	0	0	0	Typical	1	1	1	1		0	0	0	0		0	0	0	0
tr|G1T5Y3|G1T5Y3_RABIT	VPS26B	Uncharacterized protein OS=Oryctolagus cuniculus (Rabbit) GN=VPS26B PE=4 SV=2			0	0	0	0	Typical	1	1	1	1		0	0	0	0	Typical	1	1	1	1		0	0	0	0		0	0	0	0		0	0	0	0	Typical	1	1	1	1	Typical	1	1	1	1
tr|G1T286|G1T286_RABIT	VPS29	Vacuolar protein sorting-associated protein 29 OS=Oryctolagus cuniculus (Rabbit) GN=VPS29 PE=3 SV=1			0	0	0	0	Typical	1	1	1	1		0	0	0	0		0	0	0	0		0	0	0	0		0	0	0	0		0	0	0	0		0	0	0	0		0	0	0	0
tr|G1SZE0|G1SZE0_RABIT	VPS35	Uncharacterized protein OS=Oryctolagus cuniculus (Rabbit) GN=VPS35 PE=4 SV=1			0	0	0	0	Typical	1	1	1	1	Typical	1	1	1	1	Typical	1	1	1	1		0	0	0	0		0	0	0	0		0	0	0	0	Typical	1	1	1	1	Typical	1	1	1	1
tr|G1TCU1|G1TCU1_RABIT	ZC3H7A	Uncharacterized protein OS=Oryctolagus cuniculus (Rabbit) GN=ZC3H7A PE=4 SV=1			0	0	0	0		0	0	0	0		0	0	0	0	Typical	1	1	1	1		0	0	0	0		0	0	0	0		0	0	0	0		0	0	0	0		0	0	0	0
tr|G1SMY7|G1SMY7_RABIT	APEH	Acylamino-acid-releasing enzyme OS=Oryctolagus cuniculus (Rabbit) GN=APEH PE=4 SV=1			0	0	0	0	Typical	3	3	3	3		0	0	0	0		0	0	0	0	Typical	1	1	1	1		0	0	0	0	Typical	2	2	2	2	Typical	2	2	2	2	Typical	3	6	6	6
tr|G1U0V2|G1U0V2_RABIT	SNCA	Alpha-synuclein OS=Oryctolagus cuniculus (Rabbit) GN=SNCA PE=3 SV=1			0	0	0	0	Typical	1	1	1	1		0	0	0	0		0	0	0	0		0	0	0	0		0	0	0	0		0	0	0	0	Typical	2	3	3	3	Typical	1	2	2	2
sp|P25704|ENOB_RABIT	ENO3	Beta-enolase OS=Oryctolagus cuniculus (Rabbit) GN=ENO3 PE=1 SV=4			0	0	0	0		0	0	0	0		0	0	0	0		0	0	0	0		0	0	0	0		0	0	0	0		0	0	0	0	Typical	1	1	1	1	Typical	1	1	1	1
sp|P00008|CYC_RABIT	CYCS CYC	Cytochrome c OS=Oryctolagus cuniculus (Rabbit) GN=CYCS PE=1 SV=2			0	0	0	0		0	0	0	0		0	0	0	0		0	0	0	0		0	0	0	0		0	0	0	0	Typical	3	5	5	5	Typical	2	4	4	4	Typical	1	1	1	1
tr|G1SZX9|G1SZX9_RABIT	WWP2	E3 ubiquitin-protein ligase OS=Oryctolagus cuniculus (Rabbit) GN=WWP2 PE=4 SV=1			0	0	0	0	Typical	1	1	1	1	Typical	1	1	1	1		0	0	0	0		0	0	0	0		0	0	0	0		0	0	0	0		0	0	0	0		0	0	0	0
tr|B7NZF4|B7NZF4_RABIT	HYPK	Huntingtin interacting protein K (Predicted) OS=Oryctolagus cuniculus (Rabbit) GN=HYPK PE=4 SV=1			0	0	0	0	Typical	2	12	12	12	Typical	2	9	9	9	Typical	1	6	6	6	Typical	1	3	3	3	Typical	1	3	3	3	Typical	1	2	2	2		0	0	0	0		0	0	0	0
tr|A7X8X3|A7X8X3_RABIT	HPRT HPRT1	Hypoxanthine phosphoribosyltransferase OS=Oryctolagus cuniculus (Rabbit) GN=HPRT PE=2 SV=1			0	0	0	0	Typical	1	2	2	2		0	0	0	0		0	0	0	0		0	0	0	0		0	0	0	0	Typical	1	1	1	1	Typical	2	2	2	2		0	0	0	0
sp|P01840|KAC4_RABIT		Ig kappa-b4 chain C region OS=Oryctolagus cuniculus (Rabbit) PE=1 SV=1			0	0	0	0		0	0	0	0	Typical	1	2	2	2		0	0	0	0		0	0	0	0		0	0	0	0		0	0	0	0		0	0	0	0		0	0	0	0
sp|P02602|MYL1_RABIT	MYL1	Myosin light chain 1/3, skeletal muscle isoform OS=Oryctolagus cuniculus (Rabbit) GN=MYL1 PE=1 SV=3			0	0	0	0	Typical	1	1	1	1	Typical	1	2	2	2	Typical	1	1	1	1		0	0	0	0		0	0	0	0		0	0	0	0		0	0	0	0		0	0	0	0
sp|P07466|DEF6_RABIT		Neutrophil antibiotic peptide NP-5 OS=Oryctolagus cuniculus (Rabbit) PE=1 SV=2			0	0	0	0		0	0	0	0		0	0	0	0		0	0	0	0		0	0	0	0		0	0	0	0	Typical	1	1	1	1		0	0	0	0		0	0	0	0
tr|G1U9T4|G1U9T4_RABIT	NME2	Nucleoside diphosphate kinase OS=Oryctolagus cuniculus (Rabbit) GN=NME2 PE=3 SV=1			0	0	0	0	Typical	2	2	2	2		0	0	0	0		0	0	0	0		0	0	0	0		0	0	0	0	Sameset	1	3	3	3	Typical	2	2	2	2	Typical	2	5	5	5
sp|Q8MK67|PEBP1_RABIT	PEBP1 PBP	Phosphatidylethanolamine-binding protein 1 OS=Oryctolagus cuniculus (Rabbit) GN=PEBP1 PE=2 SV=1			0	0	0	0		0	0	0	0		0	0	0	0		0	0	0	0		0	0	0	0		0	0	0	0		0	0	0	0	Typical	1	1	1	1	Typical	1	1	1	1
tr|Q95J97|Q95J97_RABIT		PKA catalytic subunit alpha OS=Oryctolagus cuniculus (Rabbit) PE=2 SV=1			0	0	0	0		0	0	0	0		0	0	0	0		0	0	0	0		0	0	0	0	Typical	1	1	1	1		0	0	0	0		0	0	0	0		0	0	0	0
sp|Q28719|PTGR1_RABIT	PTGR1 LTB4DH	Prostaglandin reductase 1 OS=Oryctolagus cuniculus (Rabbit) GN=PTGR1 PE=2 SV=1			0	0	0	0	Typical	1	1	1	1		0	0	0	0	Typical	1	1	1	1		0	0	0	0		0	0	0	0	Typical	1	1	1	1	Typical	1	2	2	2	Typical	1	1	1	1
tr|G1T2L1|G1T2L1_RABIT	PSMA2	Proteasome subunit alpha type OS=Oryctolagus cuniculus (Rabbit) GN=PSMA2 PE=3 SV=1			0	0	0	0		0	0	0	0		0	0	0	0		0	0	0	0		0	0	0	0		0	0	0	0		0	0	0	0		0	0	0	0	Typical	1	1	1	1
tr|G1T9V4|G1T9V4_RABIT	PSMA6	Proteasome subunit alpha type OS=Oryctolagus cuniculus (Rabbit) GN=PSMA6 PE=3 SV=1			0	0	0	0	Typical	1	1	1	1	Typical	1	1	1	1	Typical	1	1	1	1		0	0	0	0		0	0	0	0		0	0	0	0		0	0	0	0	Typical	1	1	1	1
tr|B7NZD7|B7NZD7_RABIT	PSMB4	Proteasome subunit beta type OS=Oryctolagus cuniculus (Rabbit) GN=PSMB4 PE=3 SV=1			0	0	0	0		0	0	0	0		0	0	0	0	Typical	1	1	1	1		0	0	0	0		0	0	0	0		0	0	0	0	Typical	1	1	1	1	Typical	1	1	1	1
tr|G1T235|G1T235_RABIT	PSMB6	Proteasome subunit beta type OS=Oryctolagus cuniculus (Rabbit) GN=PSMB6 PE=3 SV=1			0	0	0	0		0	0	0	0		0	0	0	0		0	0	0	0		0	0	0	0		0	0	0	0	Typical	1	1	1	1		0	0	0	0	Typical	1	1	1	1
tr|G1SWK8|G1SWK8_RABIT	PSMB7	Proteasome subunit beta type OS=Oryctolagus cuniculus (Rabbit) GN=PSMB7 PE=3 SV=2			0	0	0	0		0	0	0	0		0	0	0	0		0	0	0	0	Typical	1	1	1	1		0	0	0	0		0	0	0	0		0	0	0	0		0	0	0	0
sp|Q95MN6|PLP2_RABIT	PLP2	Proteolipid protein 2 OS=Oryctolagus cuniculus (Rabbit) GN=PLP2 PE=2 SV=1			0	0	0	0	Typical	1	2	2	2	Typical	1	1	1	1		0	0	0	0		0	0	0	0	Typical	1	1	1	1	Typical	1	1	1	1	Typical	1	2	2	2		0	0	0	0
tr|G1T8G9|G1T8G9_RABIT	PKLR	Pyruvate kinase OS=Oryctolagus cuniculus (Rabbit) GN=PKLR PE=3 SV=1			0	0	0	0		0	0	0	0		0	0	0	0		0	0	0	0		0	0	0	0		0	0	0	0		0	0	0	0		0	0	0	0	Typical	1	2	2	2
sp|Q8MI17|AL1A1_RABIT	ALDH1A1	Retinal dehydrogenase 1 OS=Oryctolagus cuniculus (Rabbit) GN=ALDH1A1 PE=2 SV=1			0	0	0	0	Typical	1	1	1	1		0	0	0	0		0	0	0	0		0	0	0	0		0	0	0	0	Typical	1	1	1	1	Typical	2	2	2	2	Typical	4	5	5	5
tr|G1T5A0|G1T5A0_RABIT	RRM1	Ribonucleoside-diphosphate reductase OS=Oryctolagus cuniculus (Rabbit) GN=RRM1 PE=3 SV=1			0	0	0	0	Typical	1	1	1	1		0	0	0	0		0	0	0	0		0	0	0	0		0	0	0	0		0	0	0	0		0	0	0	0	Typical	1	1	1	1
sp|P08628|THIO_RABIT	TXN	Thioredoxin OS=Oryctolagus cuniculus (Rabbit) GN=TXN PE=1 SV=2			0	0	0	0		0	0	0	0		0	0	0	0		0	0	0	0		0	0	0	0		0	0	0	0		0	0	0	0	Typical	2	3	3	3		0	0	0	0
tr|G1T8R2|G1T8R2_RABIT	ABCB6	Uncharacterized protein OS=Oryctolagus cuniculus (Rabbit) GN=ABCB6 PE=3 SV=2			0	0	0	0	Typical	1	2	2	2	Typical	1	1	1	1	Typical	1	2	2	2	Typical	1	1	1	1	Typical	1	1	1	1	Typical	1	2	2	2	Typical	1	1	1	1		0	0	0	0
tr|G1T489|G1T489_RABIT		Uncharacterized protein OS=Oryctolagus cuniculus (Rabbit) GN=ACP1 PE=4 SV=1			0	0	0	0	Typical	1	1	1	1		0	0	0	0		0	0	0	0		0	0	0	0		0	0	0	0	Typical	1	2	2	2	Typical	1	1	1	1	Typical	1	1	1	1
tr|G1SQ11|G1SQ11_RABIT	ALDH18A1	Uncharacterized protein OS=Oryctolagus cuniculus (Rabbit) GN=ALDH18A1 PE=3 SV=1			0	0	0	0		0	0	0	0		0	0	0	0		0	0	0	0		0	0	0	0	Typical	1	1	1	1	Typical	1	1	1	1		0	0	0	0	Typical	1	1	1	1
tr|G1TZV3|G1TZV3_RABIT	AP1M1	Uncharacterized protein OS=Oryctolagus cuniculus (Rabbit) GN=AP1M1 PE=4 SV=1			0	0	0	0	Typical	1	1	1	1	Typical	1	1	1	1		0	0	0	0		0	0	0	0		0	0	0	0		0	0	0	0		0	0	0	0		0	0	0	0
tr|G1SN14|G1SN14_RABIT	CAND1	Uncharacterized protein OS=Oryctolagus cuniculus (Rabbit) GN=CAND1 PE=4 SV=2			0	0	0	0	Typical	1	1	1	1		0	0	0	0		0	0	0	0		0	0	0	0		0	0	0	0		0	0	0	0		0	0	0	0	Typical	1	1	1	1
tr|G1SZR6|G1SZR6_RABIT	CUL3	Uncharacterized protein OS=Oryctolagus cuniculus (Rabbit) GN=CUL3 PE=3 SV=2			0	0	0	0	Typical	1	1	1	1		0	0	0	0		0	0	0	0		0	0	0	0		0	0	0	0		0	0	0	0		0	0	0	0		0	0	0	0
tr|G1SYJ4|G1SYJ4_RABIT	ENO1	Uncharacterized protein OS=Oryctolagus cuniculus (Rabbit) GN=ENO1 PE=3 SV=1			0	0	0	0	Typical	1	1	1	1		0	0	0	0		0	0	0	0		0	0	0	0		0	0	0	0	Typical	2	2	2	2	Typical	1	1	1	1	Typical	5	5	5	5
tr|G1SI58|G1SI58_RABIT	EPN3	Uncharacterized protein OS=Oryctolagus cuniculus (Rabbit) GN=EPN3 PE=4 SV=1			0	0	0	0	Typical	1	2	2	2	Typical	1	1	1	1		0	0	0	0		0	0	0	0		0	0	0	0		0	0	0	0		0	0	0	0		0	0	0	0
tr|G1TER0|G1TER0_RABIT	EXOC1	Uncharacterized protein OS=Oryctolagus cuniculus (Rabbit) GN=EXOC1 PE=4 SV=1			0	0	0	0	Typical	1	1	1	1	Typical	1	1	1	1		0	0	0	0		0	0	0	0		0	0	0	0		0	0	0	0		0	0	0	0		0	0	0	0
tr|G1T271|G1T271_RABIT	EXOSC1	Uncharacterized protein OS=Oryctolagus cuniculus (Rabbit) GN=EXOSC1 PE=4 SV=1			0	0	0	0		0	0	0	0	Typical	1	1	1	1		0	0	0	0		0	0	0	0		0	0	0	0		0	0	0	0		0	0	0	0		0	0	0	0
tr|G1SZN0|G1SZN0_RABIT	FAM120A	Uncharacterized protein OS=Oryctolagus cuniculus (Rabbit) GN=FAM120A PE=4 SV=2			0	0	0	0	Typical	1	1	1	1	Typical	1	1	1	1	Typical	1	1	1	1	Typical	2	2	2	2		0	0	0	0	Typical	1	1	1	1	Sameset	1	1	1	1		0	0	0	0
tr|G1SXL6|G1SXL6_RABIT	FRYL	Uncharacterized protein OS=Oryctolagus cuniculus (Rabbit) GN=FRYL PE=4 SV=2			0	0	0	0		0	0	0	0	Typical	2	2	2	2		0	0	0	0		0	0	0	0		0	0	0	0		0	0	0	0		0	0	0	0		0	0	0	0
tr|G1SDJ0|G1SDJ0_RABIT		Uncharacterized protein OS=Oryctolagus cuniculus (Rabbit) GN=HNRNPM PE=4 SV=1			0	0	0	0		0	0	0	0		0	0	0	0		0	0	0	0		0	0	0	0		0	0	0	0		0	0	0	0	Typical	1	1	1	1		0	0	0	0
tr|G1SI36|G1SI36_RABIT	KPNA1	Uncharacterized protein OS=Oryctolagus cuniculus (Rabbit) GN=KPNA1 PE=4 SV=2			0	0	0	0		0	0	0	0		0	0	0	0	Typical	1	1	1	1		0	0	0	0		0	0	0	0		0	0	0	0		0	0	0	0		0	0	0	0
tr|G1SQA9|G1SQA9_RABIT	WDR92	Uncharacterized protein OS=Oryctolagus cuniculus (Rabbit) GN=LOC100337796 PE=4 SV=1			0	0	0	0	Typical	1	1	1	1	Typical	1	1	1	1	Typical	1	2	2	2	Typical	1	1	1	1		0	0	0	0	Typical	1	1	1	1		0	0	0	0		0	0	0	0
tr|G1TQG4|G1TQG4_RABIT	LOC100350339 LOC100342906	Uncharacterized protein OS=Oryctolagus cuniculus (Rabbit) GN=LOC100338350 PE=4 SV=1			0	0	0	0		0	0	0	0		0	0	0	0		0	0	0	0		0	0	0	0		0	0	0	0	Typical	1	1	1	1	Typical	1	1	1	1		0	0	0	0
tr|G1TLJ2|G1TLJ2_RABIT	LOC100345459	Uncharacterized protein OS=Oryctolagus cuniculus (Rabbit) GN=LOC100345459 PE=3 SV=1			0	0	0	0	Sameset	1	1	0	0.5		0	0	0	0	Sameset	1	1	0	0.5	Subset	1	1	0	0.5		0	0	0	0	Typical	2	2	1	1.5	Typical	3	3	1	2	Typical	3	5	1	3
tr|G1TJG8|G1TJG8_RABIT	LOC100346360	Uncharacterized protein OS=Oryctolagus cuniculus (Rabbit) GN=LOC100346360 PE=3 SV=1			0	0	0	0		0	0	0	0		0	0	0	0	Typical	1	1	1	1		0	0	0	0		0	0	0	0		0	0	0	0		0	0	0	0		0	0	0	0
tr|G1SZ25|G1SZ25_RABIT	LOC100351756	Uncharacterized protein OS=Oryctolagus cuniculus (Rabbit) GN=LOC100351756 PE=4 SV=1			0	0	0	0		0	0	0	0		0	0	0	0		0	0	0	0		0	0	0	0		0	0	0	0	Typical	1	1	1	1		0	0	0	0	Typical	1	1	1	1
tr|G1TDB6|G1TDB6_RABIT	GBP1	Uncharacterized protein OS=Oryctolagus cuniculus (Rabbit) GN=LOC100358539 PE=4 SV=2			0	0	0	0		0	0	0	0		0	0	0	0		0	0	0	0		0	0	0	0	Typical	1	1	1	1		0	0	0	0	Typical	1	1	1	1	Typical	3	3	3	3
tr|G1T1U7|G1T1U7_RABIT	MTHFD1	Uncharacterized protein OS=Oryctolagus cuniculus (Rabbit) GN=MTHFD1 PE=3 SV=1			0	0	0	0		0	0	0	0		0	0	0	0		0	0	0	0		0	0	0	0		0	0	0	0		0	0	0	0	Typical	1	1	1	1	Typical	3	4	4	4
tr|G1SPB8|G1SPB8_RABIT	NAP1L4	Uncharacterized protein OS=Oryctolagus cuniculus (Rabbit) GN=NAP1L4 PE=3 SV=1			0	0	0	0	Typical	1	1	1	1	Typical	1	1	1	1		0	0	0	0		0	0	0	0	Typical	1	2	2	2	Typical	1	1	1	1	Typical	1	1	1	1	Typical	1	1	1	1
tr|G1SKM5|G1SKM5_RABIT	NPLOC4	Uncharacterized protein OS=Oryctolagus cuniculus (Rabbit) GN=NPLOC4 PE=4 SV=1			0	0	0	0	Typical	2	2	2	2	Typical	1	1	1	1		0	0	0	0		0	0	0	0		0	0	0	0		0	0	0	0		0	0	0	0		0	0	0	0
tr|G1TBS1|G1TBS1_RABIT	PARK7	Uncharacterized protein OS=Oryctolagus cuniculus (Rabbit) GN=PARK7 PE=4 SV=1			0	0	0	0		0	0	0	0		0	0	0	0		0	0	0	0		0	0	0	0		0	0	0	0	Typical	1	1	1	1		0	0	0	0	Typical	1	2	2	2
tr|G1SPF5|G1SPF5_RABIT	PGAM1	Uncharacterized protein OS=Oryctolagus cuniculus (Rabbit) GN=PGAM1 PE=4 SV=1			0	0	0	0		0	0	0	0		0	0	0	0		0	0	0	0		0	0	0	0		0	0	0	0	Typical	1	1	0	0.333333		0	0	0	0	Typical	2	2	1	1.33333
tr|G1TA74|G1TA74_RABIT	PPFIA2	Uncharacterized protein OS=Oryctolagus cuniculus (Rabbit) GN=PPFIA2 PE=4 SV=2			0	0	0	0	Typical	1	1	1	1	Typical	1	1	1	1		0	0	0	0		0	0	0	0		0	0	0	0		0	0	0	0		0	0	0	0		0	0	0	0
tr|G1TCZ8|G1TCZ8_RABIT	PPP2R1A	Uncharacterized protein OS=Oryctolagus cuniculus (Rabbit) GN=PPP2R1A PE=4 SV=1			0	0	0	0		0	0	0	0	Typical	1	1	1	1		0	0	0	0		0	0	0	0		0	0	0	0		0	0	0	0	Typical	1	1	1	1		0	0	0	0
tr|G1SEA7|G1SEA7_RABIT	PRKAA1	Uncharacterized protein OS=Oryctolagus cuniculus (Rabbit) GN=PRKAA1 PE=4 SV=2			0	0	0	0	Typical	1	1	1	1	Typical	1	1	1	1		0	0	0	0		0	0	0	0		0	0	0	0		0	0	0	0		0	0	0	0		0	0	0	0
tr|G1SYV0|G1SYV0_RABIT	PSMC2	Uncharacterized protein OS=Oryctolagus cuniculus (Rabbit) GN=PSMC2 PE=3 SV=1			0	0	0	0	Typical	1	1	1	1	Typical	1	1	1	1	Typical	1	1	1	1	Typical	1	1	1	1		0	0	0	0	Typical	1	1	1	1	Typical	1	1	1	1		0	0	0	0
tr|G1TH06|G1TH06_RABIT	RANBP1	Uncharacterized protein OS=Oryctolagus cuniculus (Rabbit) GN=RANBP1 PE=4 SV=2			0	0	0	0	Typical	2	2	2	2	Typical	2	2	2	2	Typical	1	1	1	1	Typical	2	2	2	2		0	0	0	0	Typical	2	4	4	4		0	0	0	0	Typical	1	1	1	1
tr|G1SKY7|G1SKY7_RABIT		Uncharacterized protein OS=Oryctolagus cuniculus (Rabbit) GN=TARDBP PE=4 SV=2			0	0	0	0	Typical	1	1	1	1	Typical	1	1	1	1		0	0	0	0		0	0	0	0		0	0	0	0		0	0	0	0		0	0	0	0		0	0	0	0
tr|G1SYL8|G1SYL8_RABIT		Uncharacterized protein OS=Oryctolagus cuniculus (Rabbit) GN=TCEB2 PE=4 SV=2			0	0	0	0		0	0	0	0		0	0	0	0		0	0	0	0		0	0	0	0		0	0	0	0		0	0	0	0		0	0	0	0	Typical	1	1	1	1
tr|G1U410|G1U410_RABIT	TUBB4A	Uncharacterized protein OS=Oryctolagus cuniculus (Rabbit) GN=TUBB4A PE=3 SV=1			0	0	0	0		0	0	0	0		0	0	0	0		0	0	0	0		0	0	0	0		0	0	0	0		0	0	0	0		0	0	0	0	Typical	1	1	1	1
tr|G1STU0|G1STU0_RABIT	WDR77	Uncharacterized protein OS=Oryctolagus cuniculus (Rabbit) GN=WDR77 PE=4 SV=1			0	0	0	0		0	0	0	0		0	0	0	0		0	0	0	0	Typical	1	1	1	1		0	0	0	0	Typical	1	2	2	2	Typical	1	1	1	1		0	0	0	0
tr|G1TFL3|G1TFL3_RABIT		Uncharacterized protein OS=Oryctolagus cuniculus (Rabbit) PE=4 SV=1			0	0	0	0	Typical	1	2	2	2	Typical	1	2	2	2		0	0	0	0	Typical	1	3	3	3		0	0	0	0	Typical	1	3	3	3	Typical	1	3	3	3	Typical	2	3	3	3
tr|G1TAQ7|G1TAQ7_RABIT		Uncharacterized protein OS=Oryctolagus cuniculus (Rabbit) PE=4 SV=1			0	0	0	0	Typical	1	1	1	1		0	0	0	0		0	0	0	0		0	0	0	0		0	0	0	0		0	0	0	0		0	0	0	0		0	0	0	0
tr|G1SNS5|G1SNS5_RABIT		Uncharacterized protein OS=Oryctolagus cuniculus (Rabbit) PE=4 SV=1			0	0	0	0		0	0	0	0		0	0	0	0		0	0	0	0		0	0	0	0		0	0	0	0	Typical	1	1	1	1		0	0	0	0		0	0	0	0
tr|G1SYR7|G1SYR7_RABIT		Uncharacterized protein OS=Oryctolagus cuniculus (Rabbit) PE=4 SV=2			0	0	0	0	Typical	2	3	3	3	Typical	1	2	2	2	Typical	1	1	1	1	Typical	1	1	1	1	Typical	2	3	3	3	Typical	1	1	1	1	Typical	1	1	1	1	Typical	2	2	2	2
tr|G1THZ6|G1THZ6_RABIT		Uncharacterized protein OS=Oryctolagus cuniculus (Rabbit) PE=4 SV=2			0	0	0	0		0	0	0	0		0	0	0	0		0	0	0	0		0	0	0	0		0	0	0	0	Sameset	1	1	1	1		0	0	0	0	Typical	1	1	1	1
tr|G1SL80|G1SL80_RABIT	UROD	Uroporphyrinogen decarboxylase OS=Oryctolagus cuniculus (Rabbit) GN=UROD PE=3 SV=1			0	0	0	0		0	0	0	0		0	0	0	0		0	0	0	0		0	0	0	0		0	0	0	0	Typical	1	1	1	1	Typical	1	1	1	1	Typical	1	1	1	1
tr|G1SVJ5|G1SVJ5_RABIT	SARS	Serine--tRNA ligase, cytoplasmic OS=Oryctolagus cuniculus (Rabbit) GN=SARS PE=3 SV=1			0	0	0	0	Typical	1	1	1	1		0	0	0	0		0	0	0	0		0	0	0	0		0	0	0	0	Typical	1	1	1	1	Typical	1	2	2	2	Typical	5	5	5	5
tr|G1TRH5|G1TRH5_RABIT	CORO1C	Coronin OS=Oryctolagus cuniculus (Rabbit) GN=CORO1C PE=3 SV=1			0	0	0	0	Typical	1	1	1	1	Typical	1	1	1	1	Typical	3	3	3	3		0	0	0	0		0	0	0	0	Typical	1	1	1	1	Typical	2	2	2	2	Typical	2	3	3	3
tr|G1SJZ8|G1SJZ8_RABIT	CPOX	Uncharacterized protein OS=Oryctolagus cuniculus (Rabbit) GN=CPOX PE=4 SV=1			0	0	0	0		0	0	0	0		0	0	0	0		0	0	0	0		0	0	0	0		0	0	0	0	Typical	1	1	1	1	Typical	4	5	5	5	Typical	3	3	3	3
tr|G1T3X6|G1T3X6_RABIT	TRIM58	Uncharacterized protein OS=Oryctolagus cuniculus (Rabbit) GN=TRIM58 PE=4 SV=2			0	0	0	0	Typical	2	2	2	2	Typical	3	3	3	3	Typical	4	5	5	5		0	0	0	0	Typical	1	1	1	1		0	0	0	0		0	0	0	0		0	0	0	0
tr|G1SLF8|G1SLF8_RABIT	ECPAS	Uncharacterized protein OS=Oryctolagus cuniculus (Rabbit) GN=KIAA0368 PE=4 SV=2			0	0	0	0	Typical	1	1	1	1	Typical	2	2	2	2	Typical	1	1	1	1		0	0	0	0		0	0	0	0		0	0	0	0	Typical	2	2	2	2		0	0	0	0
tr|G1SIV7|G1SIV7_RABIT	NARS	Uncharacterized protein OS=Oryctolagus cuniculus (Rabbit) GN=NARS PE=3 SV=1			0	0	0	0		0	0	0	0		0	0	0	0		0	0	0	0		0	0	0	0		0	0	0	0	Typical	1	1	1	1	Typical	2	4	4	4	Typical	3	4	4	4
tr|G1SZ44|G1SZ44_RABIT	HSPE1	Uncharacterized protein OS=Oryctolagus cuniculus (Rabbit) GN=HSPE1 PE=3 SV=1			0	0	0	0	Typical	1	1	1	1	Typical	1	1	1	1	Typical	2	2	2	2	Typical	1	1	1	1		0	0	0	0		0	0	0	0	Typical	1	2	2	2	Typical	2	3	3	3
tr|G1SM21|G1SM21_RABIT		Uncharacterized protein OS=Oryctolagus cuniculus (Rabbit) GN=UROS PE=4 SV=2			0	0	0	0	Typical	2	2	2	2		0	0	0	0		0	0	0	0		0	0	0	0		0	0	0	0		0	0	0	0		0	0	0	0	Typical	3	3	3	3
tr|G1U4V1|G1U4V1_RABIT	EXOSC4	Uncharacterized protein OS=Oryctolagus cuniculus (Rabbit) GN=EXOSC4 PE=4 SV=1			0	0	0	0	Typical	2	2	2	2	Typical	1	1	1	1		0	0	0	0		0	0	0	0		0	0	0	0	Typical	2	2	2	2	Typical	1	1	1	1	Typical	1	1	1	1
tr|G1TAC4|G1TAC4_RABIT	GLRX	Glutaredoxin-1 OS=Oryctolagus cuniculus (Rabbit) GN=GLRX PE=4 SV=1			0	0	0	0		0	0	0	0		0	0	0	0		0	0	0	0		0	0	0	0		0	0	0	0	Sameset	1	2	2	2	Typical	2	3	3	3	Typical	2	6	6	6
tr|G1SSA2|G1SSA2_RABIT	PSMD2	Uncharacterized protein OS=Oryctolagus cuniculus (Rabbit) GN=PSMD2 PE=4 SV=2			0	0	0	0	Typical	2	2	2	2	Typical	1	1	1	1	Typical	1	1	1	1	Typical	2	2	2	2	Typical	1	1	1	1		0	0	0	0		0	0	0	0		0	0	0	0
tr|U3KLX7|U3KLX7_RABIT	CUBN	Uncharacterized protein OS=Oryctolagus cuniculus (Rabbit) GN=RSU1 PE=4 SV=1			0	0	0	0		0	0	0	0		0	0	0	0		0	0	0	0		0	0	0	0		0	0	0	0	Typical	1	1	1	1	Typical	2	2	2	2	Typical	2	2	2	2
tr|G1SV05|G1SV05_RABIT	HSPA4	Uncharacterized protein OS=Oryctolagus cuniculus (Rabbit) GN=HSPA4 PE=3 SV=2			0	0	0	0	Typical	1	1	1	1		0	0	0	0		0	0	0	0		0	0	0	0		0	0	0	0		0	0	0	0		0	0	0	0	Typical	3	3	3	3
tr|G1TIW6|G1TIW6_RABIT		Uncharacterized protein OS=Oryctolagus cuniculus (Rabbit) GN=LOC100345202 PE=3 SV=2			0	0	0	0	Sameset	1	1	0	0.5		0	0	0	0	Sameset	1	1	0	0.5	Sameset	2	2	1	1.5		0	0	0	0	Sameset	2	2	1	1.5	Subset	2	2	0	1	Typical	3	5	1	3
tr|G1SYD9|G1SYD9_RABIT	CMPK2	Uncharacterized protein OS=Oryctolagus cuniculus (Rabbit) GN=CMPK2 PE=3 SV=1			0	0	0	0		0	0	0	0		0	0	0	0		0	0	0	0		0	0	0	0		0	0	0	0		0	0	0	0	Typical	1	1	1	1	Typical	2	2	2	2
tr|G1T291|G1T291_RABIT	MYCBP2	Uncharacterized protein OS=Oryctolagus cuniculus (Rabbit) GN=MYCBP2 PE=4 SV=1			0	0	0	0	Typical	1	1	1	1		0	0	0	0		0	0	0	0	Typical	1	1	1	1		0	0	0	0	Typical	1	1	1	1		0	0	0	0		0	0	0	0
tr|G1SEM7|G1SEM7_RABIT	THG1L	tRNA(His) guanylyltransferase OS=Oryctolagus cuniculus (Rabbit) GN=THG1L PE=3 SV=1			0	0	0	0	Typical	1	1	1	1		0	0	0	0		0	0	0	0	Typical	1	1	1	1		0	0	0	0	Typical	1	1	1	1	Typical	3	3	3	3	Typical	1	2	2	2
tr|G1TCK9|G1TCK9_RABIT	IARS	Uncharacterized protein OS=Oryctolagus cuniculus (Rabbit) GN=IARS PE=3 SV=2			0	0	0	0		0	0	0	0		0	0	0	0		0	0	0	0		0	0	0	0		0	0	0	0		0	0	0	0	Typical	1	1	1	1		0	0	0	0
tr|B8K130|B8K130_RABIT	RA_m008_jsm295ECf	Hemoglobin subunit zeta (Predicted) OS=Oryctolagus cuniculus (Rabbit) GN=RA_m008_jsm295ECf PE=3 SV=1			0	0	0	0	Typical	1	2	2	2		0	0	0	0		0	0	0	0		0	0	0	0		0	0	0	0	Typical	2	2	1	2	Typical	2	4	2	4	Typical	2	4	1	4
tr|G1SES0|G1SES0_RABIT	ARHGAP4	Uncharacterized protein OS=Oryctolagus cuniculus (Rabbit) GN=ARHGAP4 PE=4 SV=2			0	0	0	0	Typical	1	1	1	1	Typical	2	2	2	2	Typical	2	3	3	3	Typical	1	1	1	1		0	0	0	0	Typical	1	1	1	1		0	0	0	0	Typical	1	1	1	1
tr|G1SYD3|G1SYD3_RABIT	YARS	Tyrosine--tRNA ligase OS=Oryctolagus cuniculus (Rabbit) GN=YARS PE=3 SV=1			0	0	0	0	Typical	3	4	4	4		0	0	0	0		0	0	0	0		0	0	0	0		0	0	0	0		0	0	0	0		0	0	0	0		0	0	0	0
tr|G1TCF9|G1TCF9_RABIT	RIOK3	Uncharacterized protein OS=Oryctolagus cuniculus (Rabbit) GN=RIOK3 PE=4 SV=1			0	0	0	0	Typical	1	1	1	1		0	0	0	0		0	0	0	0	Typical	1	1	1	1	Typical	1	1	1	1		0	0	0	0		0	0	0	0	Typical	1	1	1	1
tr|G1TAK5|G1TAK5_RABIT	WNK4	Uncharacterized protein OS=Oryctolagus cuniculus (Rabbit) GN=WNK4 PE=4 SV=1			0	0	0	0	Typical	1	1	1	1	Typical	1	1	1	1		0	0	0	0		0	0	0	0		0	0	0	0	Typical	2	2	2	2	Typical	1	1	1	1		0	0	0	0
tr|B7NZF9|B7NZF9_RABIT	NPM1	Nucleophosmin 1 isoform 1 (Predicted) OS=Oryctolagus cuniculus (Rabbit) GN=NPM1 PE=4 SV=1			0	0	0	0		0	0	0	0		0	0	0	0		0	0	0	0	Typical	2	2	2	2		0	0	0	0		0	0	0	0		0	0	0	0		0	0	0	0
tr|G1SN52|G1SN52_RABIT	XPO7	Uncharacterized protein OS=Oryctolagus cuniculus (Rabbit) GN=XPO7 PE=4 SV=1			0	0	0	0		0	0	0	0		0	0	0	0		0	0	0	0		0	0	0	0		0	0	0	0	Typical	1	2	2	2	Typical	2	3	3	3	Typical	1	1	1	1
tr|G1TFT4|G1TFT4_RABIT	VAMP3	Uncharacterized protein OS=Oryctolagus cuniculus (Rabbit) GN=VAMP3 PE=4 SV=1			0	0	0	0	Typical	2	2	2	2	Typical	1	1	1	1		0	0	0	0		0	0	0	0		0	0	0	0	Sameset	1	1	1	1		0	0	0	0		0	0	0	0
tr|G1T0L1|G1T0L1_RABIT	LSM3	Uncharacterized protein OS=Oryctolagus cuniculus (Rabbit) GN=LSM3 PE=4 SV=1			0	0	0	0	Typical	3	3	3	3	Typical	2	3	3	3	Typical	2	4	4	4		0	0	0	0		0	0	0	0	Typical	1	3	3	3	Typical	1	3	3	3	Typical	1	3	3	3
tr|G1SED7|G1SED7_RABIT	EXOSC7	Uncharacterized protein OS=Oryctolagus cuniculus (Rabbit) GN=EXOSC7 PE=4 SV=1			0	0	0	0	Typical	1	1	1	1		0	0	0	0		0	0	0	0		0	0	0	0		0	0	0	0		0	0	0	0		0	0	0	0		0	0	0	0
tr|G1T661|G1T661_RABIT	SORT1	Uncharacterized protein OS=Oryctolagus cuniculus (Rabbit) GN=SORT1 PE=4 SV=2			0	0	0	0	Typical	1	1	1	1		0	0	0	0	Typical	1	2	2	2		0	0	0	0	Typical	1	2	2	2	Typical	1	1	1	1	Typical	1	1	1	1	Typical	1	2	2	2
tr|G1TES1|G1TES1_RABIT		Uncharacterized protein OS=Oryctolagus cuniculus (Rabbit) PE=4 SV=1			0	0	0	0		0	0	0	0	Typical	1	1	1	1	Typical	2	2	1	1.55556	Typical	2	2	1	1.55556	Typical	1	1	1	1		0	0	0	0	Typical	1	1	1	1		0	0	0	0
tr|G1T967|G1T967_RABIT	EXOC6B	Uncharacterized protein OS=Oryctolagus cuniculus (Rabbit) GN=EXOC6B PE=4 SV=1			0	0	0	0		0	0	0	0		0	0	0	0	Typical	1	1	1	1		0	0	0	0		0	0	0	0		0	0	0	0		0	0	0	0		0	0	0	0
tr|G1T089|G1T089_RABIT	THUMPD3	Uncharacterized protein OS=Oryctolagus cuniculus (Rabbit) GN=THUMPD3 PE=4 SV=1			0	0	0	0		0	0	0	0		0	0	0	0		0	0	0	0		0	0	0	0		0	0	0	0		0	0	0	0	Typical	2	2	2	2		0	0	0	0
tr|G1T765|G1T765_RABIT	MDH2	Malate dehydrogenase OS=Oryctolagus cuniculus (Rabbit) GN=MDH2 PE=3 SV=1			0	0	0	0		0	0	0	0		0	0	0	0		0	0	0	0		0	0	0	0		0	0	0	0	Typical	2	2	2	2		0	0	0	0		0	0	0	0
tr|G1SZI1|G1SZI1_RABIT	BNIP3L	Uncharacterized protein OS=Oryctolagus cuniculus (Rabbit) GN=BNIP3L PE=4 SV=1			0	0	0	0		0	0	0	0		0	0	0	0	Typical	1	2	2	2		0	0	0	0		0	0	0	0	Typical	1	3	3	3	Typical	1	1	1	1	Typical	1	2	2	2
tr|G1T1E5|G1T1E5_RABIT	EXOSC5	Uncharacterized protein OS=Oryctolagus cuniculus (Rabbit) GN=EXOSC5 PE=4 SV=1			0	0	0	0		0	0	0	0	Typical	1	1	1	1		0	0	0	0	Typical	1	1	1	1		0	0	0	0	Typical	1	1	1	1		0	0	0	0		0	0	0	0
tr|G1SZ91|G1SZ91_RABIT	FABP5	Uncharacterized protein OS=Oryctolagus cuniculus (Rabbit) GN=FABP5 PE=4 SV=2			0	0	0	0		0	0	0	0		0	0	0	0	Typical	1	1	1	1		0	0	0	0		0	0	0	0	Typical	1	4	4	4	Typical	1	5	5	5	Typical	1	4	4	4
tr|G1SYL3|G1SYL3_RABIT	TNPO3	Uncharacterized protein OS=Oryctolagus cuniculus (Rabbit) GN=TNPO3 PE=4 SV=1			0	0	0	0		0	0	0	0		0	0	0	0		0	0	0	0		0	0	0	0		0	0	0	0		0	0	0	0		0	0	0	0	Typical	2	2	2	2
tr|G1TDU8|G1TDU8_RABIT	ZNF622	Uncharacterized protein OS=Oryctolagus cuniculus (Rabbit) GN=ZNF622 PE=4 SV=2			0	0	0	0	Typical	1	1	1	1		0	0	0	0	Typical	1	1	1	1	Typical	2	2	2	2		0	0	0	0		0	0	0	0		0	0	0	0		0	0	0	0
tr|G1TZB2|G1TZB2_RABIT	CNOT10	Uncharacterized protein OS=Oryctolagus cuniculus (Rabbit) GN=CNOT10 PE=4 SV=2			0	0	0	0	Typical	1	1	1	1	Typical	1	1	1	1		0	0	0	0		0	0	0	0		0	0	0	0		0	0	0	0		0	0	0	0		0	0	0	0
tr|G1SW46|G1SW46_RABIT	RNASEH2B	Uncharacterized protein OS=Oryctolagus cuniculus (Rabbit) GN=RNASEH2B PE=4 SV=2			0	0	0	0		0	0	0	0	Typical	1	1	1	1		0	0	0	0		0	0	0	0		0	0	0	0	Typical	1	1	1	1	Typical	1	2	2	2	Typical	1	1	1	1
tr|G1TAP1|G1TAP1_RABIT	PPA1	Uncharacterized protein OS=Oryctolagus cuniculus (Rabbit) GN=PPA1 PE=4 SV=2			0	0	0	0		0	0	0	0		0	0	0	0		0	0	0	0		0	0	0	0		0	0	0	0		0	0	0	0		0	0	0	0	Typical	1	1	1	1
tr|G1T3M5|G1T3M5_RABIT	EEF1E1	Uncharacterized protein OS=Oryctolagus cuniculus (Rabbit) GN=EEF1E1 PE=4 SV=1			0	0	0	0		0	0	0	0		0	0	0	0		0	0	0	0	Typical	1	1	1	1		0	0	0	0	Typical	1	1	1	1	Typical	1	1	1	1	Typical	1	1	1	1
tr|G1SR29|G1SR29_RABIT	ATP6V1A	Uncharacterized protein OS=Oryctolagus cuniculus (Rabbit) GN=ATP6V1A PE=3 SV=2			0	0	0	0	Typical	1	1	1	1		0	0	0	0	Typical	1	1	1	1		0	0	0	0		0	0	0	0		0	0	0	0		0	0	0	0		0	0	0	0
tr|G1SZF7|G1SZF7_RABIT	IDH2	Isocitrate dehydrogenase [NADP] OS=Oryctolagus cuniculus (Rabbit) GN=IDH2 PE=3 SV=1			0	0	0	0	Typical	1	2	2	2	Typical	1	1	1	1	Typical	1	1	1	1	Typical	1	1	1	1	Typical	1	1	1	1	Typical	1	3	3	3		0	0	0	0	Typical	1	1	1	1
tr|G1U3B8|G1U3B8_RABIT	TXNL1	Uncharacterized protein OS=Oryctolagus cuniculus (Rabbit) GN=TXNL1 PE=4 SV=1			0	0	0	0		0	0	0	0		0	0	0	0		0	0	0	0		0	0	0	0		0	0	0	0		0	0	0	0	Typical	1	1	1	1	Typical	1	1	1	1
tr|G1SYU2|G1SYU2_RABIT	DNAJC2	Uncharacterized protein OS=Oryctolagus cuniculus (Rabbit) GN=DNAJC2 PE=4 SV=1			0	0	0	0		0	0	0	0	Typical	1	1	1	1		0	0	0	0		0	0	0	0		0	0	0	0		0	0	0	0		0	0	0	0		0	0	0	0
tr|G1U1H2|G1U1H2_RABIT	LOC100349535	Uncharacterized protein OS=Oryctolagus cuniculus (Rabbit) GN=LOC100349535 PE=4 SV=1			0	0	0	0	Typical	1	1	1	1		0	0	0	0	Subset	1	1	0	0.444444	Subset	1	1	0	0.444444		0	0	0	0	Typical	1	1	1	1	Typical	1	1	1	1	Typical	1	1	1	1
sp|P01376|DEF3_RABIT		Corticostatin-3 OS=Oryctolagus cuniculus (Rabbit) PE=1 SV=2			0	0	0	0	Typical	2	3	2	2.36364	Typical	1	2	2	2		0	0	0	0		0	0	0	0		0	0	0	0		0	0	0	0		0	0	0	0		0	0	0	0
tr|G1TXS2|G1TXS2_RABIT	MYO18A	Uncharacterized protein OS=Oryctolagus cuniculus (Rabbit) GN=MYO18A PE=4 SV=2			0	0	0	0	Typical	1	1	1	1	Typical	1	1	1	1		0	0	0	0		0	0	0	0		0	0	0	0		0	0	0	0		0	0	0	0		0	0	0	0
tr|G1U8C4|G1U8C4_RABIT	PSME1				0	0	0	0		0	0	0	0		0	0	0	0		0	0	0	0		0	0	0	0		0	0	0	0		0	0	0	0	Typical	1	1	1	1	Typical	2	2	2	2
tr|G1T369|G1T369_RABIT	DCUN1D1	DCN1-like protein OS=Oryctolagus cuniculus (Rabbit) GN=DCUN1D1 PE=4 SV=1			0	0	0	0	Typical	1	1	1	1		0	0	0	0	Typical	1	1	1	1	Typical	1	1	1	1		0	0	0	0		0	0	0	0	Typical	1	1	1	1	Typical	1	2	2	2
tr|G1TBG2|G1TBG2_RABIT	EXOC2	Uncharacterized protein OS=Oryctolagus cuniculus (Rabbit) GN=EXOC2 PE=4 SV=2			0	0	0	0		0	0	0	0		0	0	0	0		0	0	0	0	Typical	1	1	1	1		0	0	0	0		0	0	0	0		0	0	0	0		0	0	0	0
tr|G1U3P4|G1U3P4_RABIT		Uncharacterized protein OS=Oryctolagus cuniculus (Rabbit) GN=RNASEH2C PE=4 SV=1			0	0	0	0		0	0	0	0	Typical	1	1	1	1		0	0	0	0		0	0	0	0		0	0	0	0	Typical	1	1	1	1	Typical	1	1	1	1		0	0	0	0
tr|G1SID3|G1SID3_RABIT	VPS13C	Uncharacterized protein OS=Oryctolagus cuniculus (Rabbit) GN=VPS13C PE=4 SV=2			0	0	0	0		0	0	0	0		0	0	0	0		0	0	0	0	Typical	1	1	1	1		0	0	0	0		0	0	0	0		0	0	0	0		0	0	0	0
tr|G1SU30|G1SU30_RABIT	BAG6	Uncharacterized protein OS=Oryctolagus cuniculus (Rabbit) GN=BAG6 PE=4 SV=1			0	0	0	0	Typical	1	1	1	1		0	0	0	0		0	0	0	0		0	0	0	0		0	0	0	0		0	0	0	0		0	0	0	0		0	0	0	0
tr|G1TES6|G1TES6_RABIT	HSD17B10	Uncharacterized protein OS=Oryctolagus cuniculus (Rabbit) GN=HSD17B10 PE=3 SV=1			0	0	0	0		0	0	0	0		0	0	0	0		0	0	0	0		0	0	0	0		0	0	0	0	Typical	1	1	1	1		0	0	0	0		0	0	0	0
tr|G1SD50|G1SD50_RABIT	CLK2	Uncharacterized protein OS=Oryctolagus cuniculus (Rabbit) GN=CLK2 PE=3 SV=2			0	0	0	0	Typical	1	1	1	1		0	0	0	0	Typical	1	1	1	1		0	0	0	0		0	0	0	0		0	0	0	0	Typical	1	1	1	1	Typical	1	1	1	1
tr|G1T4S7|G1T4S7_RABIT	CWF19L1	Uncharacterized protein OS=Oryctolagus cuniculus (Rabbit) GN=CWF19L1 PE=4 SV=1			0	0	0	0		0	0	0	0		0	0	0	0		0	0	0	0		0	0	0	0		0	0	0	0		0	0	0	0		0	0	0	0	Typical	1	1	1	1
tr|G1T705|G1T705_RABIT	CYB5R3	Uncharacterized protein OS=Oryctolagus cuniculus (Rabbit) GN=CYB5R3 PE=4 SV=1			0	0	0	0		0	0	0	0	Typical	1	1	1	1		0	0	0	0		0	0	0	0		0	0	0	0	Typical	1	1	1	1	Typical	1	1	1	1	Typical	1	1	1	1
tr|G1T2G6|G1T2G6_RABIT	DIP2B	Uncharacterized protein OS=Oryctolagus cuniculus (Rabbit) GN=DIP2B PE=4 SV=2			0	0	0	0		0	0	0	0		0	0	0	0		0	0	0	0		0	0	0	0	Typical	1	1	1	1	Typical	1	1	1	1		0	0	0	0		0	0	0	0
tr|G1SLY0|G1SLY0_RABIT	SLC4A1	Anion exchange protein OS=Oryctolagus cuniculus (Rabbit) GN=SLC4A1 PE=3 SV=2			0	0	0	0	Typical	1	2	2	2	Typical	1	2	2	2	Typical	1	1	1	1	Typical	1	1	1	1	Typical	1	1	1	1		0	0	0	0		0	0	0	0		0	0	0	0
tr|G1SVT4|G1SVT4_RABIT	PSMD7	Uncharacterized protein OS=Oryctolagus cuniculus (Rabbit) GN=PSMD7 PE=4 SV=2			0	0	0	0		0	0	0	0		0	0	0	0		0	0	0	0	Typical	1	1	1	1		0	0	0	0		0	0	0	0	Typical	1	1	1	1		0	0	0	0
tr|G1STM4|G1STM4_RABIT	THTPA	Uncharacterized protein OS=Oryctolagus cuniculus (Rabbit) GN=THTPA PE=4 SV=1			0	0	0	0		0	0	0	0	Typical	1	1	1	1		0	0	0	0		0	0	0	0		0	0	0	0		0	0	0	0		0	0	0	0		0	0	0	0
tr|G1T066|G1T066_RABIT	RFESD	Uncharacterized protein OS=Oryctolagus cuniculus (Rabbit) GN=RFESD PE=4 SV=1			0	0	0	0		0	0	0	0		0	0	0	0		0	0	0	0		0	0	0	0		0	0	0	0		0	0	0	0		0	0	0	0	Typical	1	1	1	1
tr|G1T6C1|G1T6C1_RABIT	DERA	Uncharacterized protein OS=Oryctolagus cuniculus (Rabbit) GN=DERA PE=4 SV=2			0	0	0	0	Typical	1	1	1	1		0	0	0	0		0	0	0	0		0	0	0	0		0	0	0	0		0	0	0	0		0	0	0	0		0	0	0	0
tr|G1TDV9|G1TDV9_RABIT	CCDC43	Uncharacterized protein OS=Oryctolagus cuniculus (Rabbit) GN=CCDC43 PE=4 SV=2			0	0	0	0	Typical	1	1	1	1		0	0	0	0		0	0	0	0		0	0	0	0		0	0	0	0		0	0	0	0		0	0	0	0		0	0	0	0
sp|P11909|GPX1_RABIT	GPX1	Glutathione peroxidase 1 OS=Oryctolagus cuniculus (Rabbit) GN=GPX1 PE=2 SV=2			0	0	0	0		0	0	0	0		0	0	0	0		0	0	0	0		0	0	0	0		0	0	0	0		0	0	0	0		0	0	0	0	Typical	1	1	1	1
tr|G1TUG7|G1TUG7_RABIT	RPIA	Uncharacterized protein OS=Oryctolagus cuniculus (Rabbit) GN=RPIA PE=3 SV=1			0	0	0	0		0	0	0	0		0	0	0	0		0	0	0	0		0	0	0	0		0	0	0	0		0	0	0	0		0	0	0	0	Typical	1	1	1	1
tr|G1TRX7|G1TRX7_RABIT	DGKA	Diacylglycerol kinase OS=Oryctolagus cuniculus (Rabbit) GN=DGKA PE=3 SV=2			0	0	0	0	Typical	1	1	1	1		0	0	0	0		0	0	0	0		0	0	0	0		0	0	0	0		0	0	0	0		0	0	0	0		0	0	0	0
tr|G1TKL0|G1TKL0_RABIT	SNRPA	Uncharacterized protein OS=Oryctolagus cuniculus (Rabbit) GN=SNRPA PE=4 SV=1			0	0	0	0	Typical	1	1	1	1		0	0	0	0		0	0	0	0		0	0	0	0		0	0	0	0		0	0	0	0		0	0	0	0		0	0	0	0
tr|G1SVP9|G1SVP9_RABIT	PABPN1	Uncharacterized protein OS=Oryctolagus cuniculus (Rabbit) GN=PABPN1 PE=4 SV=1			0	0	0	0	Typical	1	1	1	1		0	0	0	0		0	0	0	0		0	0	0	0		0	0	0	0		0	0	0	0		0	0	0	0		0	0	0	0
tr|G1T143|G1T143_RABIT	TRIM25	Uncharacterized protein OS=Oryctolagus cuniculus (Rabbit) GN=TRIM25 PE=4 SV=1			0	0	0	0		0	0	0	0		0	0	0	0		0	0	0	0		0	0	0	0		0	0	0	0	Typical	1	1	1	1	Typical	1	1	1	1	Typical	1	1	1	1
tr|G1TC10|G1TC10_RABIT	UBE2M	Uncharacterized protein OS=Oryctolagus cuniculus (Rabbit) GN=UBE2M PE=3 SV=1			0	0	0	0	Typical	1	1	1	1		0	0	0	0		0	0	0	0		0	0	0	0		0	0	0	0	Typical	1	1	1	1	Typical	1	1	1	1		0	0	0	0
tr|G1TVI8|G1TVI8_RABIT	SAMD9L	Uncharacterized protein OS=Oryctolagus cuniculus (Rabbit) GN=SAMD9L PE=4 SV=1			0	0	0	0		0	0	0	0		0	0	0	0		0	0	0	0		0	0	0	0		0	0	0	0	Typical	1	1	1	1	Typical	1	1	1	1		0	0	0	0
tr|G1SI20|G1SI20_RABIT	IDH1	Isocitrate dehydrogenase [NADP] OS=Oryctolagus cuniculus (Rabbit) GN=IDH1 PE=3 SV=1			0	0	0	0		0	0	0	0		0	0	0	0		0	0	0	0		0	0	0	0		0	0	0	0	Typical	1	1	1	1		0	0	0	0		0	0	0	0
tr|G1SVP3|G1SVP3_RABIT	CFAP43	Uncharacterized protein OS=Oryctolagus cuniculus (Rabbit) GN=CFAP43 PE=4 SV=2			0	0	0	0	Typical	1	2	2	2	Typical	1	1	1	1	Typical	1	3	3	3	Typical	1	3	3	3	Typical	1	1	1	1	Typical	1	2	2	2	Typical	1	3	3	3	Typical	1	3	3	3
tr|G1TGQ6|G1TGQ6_RABIT	PACS1	Uncharacterized protein OS=Oryctolagus cuniculus (Rabbit) GN=PACS1 PE=4 SV=2			0	0	0	0	Typical	1	1	1	1	Typical	1	1	1	1		0	0	0	0		0	0	0	0		0	0	0	0		0	0	0	0		0	0	0	0		0	0	0	0
tr|G1TMQ5|G1TMQ5_RABIT	MYCBP	Uncharacterized protein OS=Oryctolagus cuniculus (Rabbit) GN=MYCBP PE=4 SV=2			0	0	0	0		0	0	0	0		0	0	0	0		0	0	0	0	Typical	1	1	1	1		0	0	0	0	Typical	1	1	1	1	Typical	1	1	1	1		0	0	0	0
tr|G1SZ16|G1SZ16_RABIT	TXNRD2	Uncharacterized protein OS=Oryctolagus cuniculus (Rabbit) GN=TXNRD2 PE=3 SV=2			0	0	0	0		0	0	0	0		0	0	0	0		0	0	0	0		0	0	0	0		0	0	0	0		0	0	0	0		0	0	0	0	Typical	1	1	1	1
tr|G1SLQ4|G1SLQ4_RABIT	ACTR3	Uncharacterized protein OS=Oryctolagus cuniculus (Rabbit) GN=ARP3 PE=3 SV=1			0	0	0	0		0	0	0	0		0	0	0	0		0	0	0	0		0	0	0	0		0	0	0	0		0	0	0	0	Typical	1	1	1	1		0	0	0	0
tr|G1U1U7|G1U1U7_RABIT	SYT11	Uncharacterized protein OS=Oryctolagus cuniculus (Rabbit) GN=SYT11 PE=4 SV=1			0	0	0	0		0	0	0	0	Typical	1	1	1	1		0	0	0	0		0	0	0	0		0	0	0	0		0	0	0	0		0	0	0	0		0	0	0	0
tr|G1TKE3|G1TKE3_RABIT	TAGLN2	Transgelin OS=Oryctolagus cuniculus (Rabbit) GN=TAGLN2 PE=3 SV=1			0	0	0	0		0	0	0	0		0	0	0	0		0	0	0	0		0	0	0	0		0	0	0	0	Typical	1	1	1	1		0	0	0	0	Typical	1	1	1	1
tr|G1T7I3|G1T7I3_RABIT	ACACA	Uncharacterized protein OS=Oryctolagus cuniculus (Rabbit) GN=ACACA PE=4 SV=2			0	0	0	0	Typical	1	1	1	1		0	0	0	0		0	0	0	0		0	0	0	0		0	0	0	0		0	0	0	0		0	0	0	0		0	0	0	0
tr|G1TRG8|G1TRG8_RABIT	GNAI2	Uncharacterized protein OS=Oryctolagus cuniculus (Rabbit) GN=GNAI2 PE=4 SV=1			0	0	0	0	Typical	1	1	1	1		0	0	0	0		0	0	0	0		0	0	0	0		0	0	0	0		0	0	0	0		0	0	0	0		0	0	0	0
tr|G1SRH7|G1SRH7_RABIT	SRSF3	Uncharacterized protein OS=Oryctolagus cuniculus (Rabbit) GN=SRSF3 PE=4 SV=1			0	0	0	0		0	0	0	0		0	0	0	0		0	0	0	0		0	0	0	0		0	0	0	0		0	0	0	0		0	0	0	0	Typical	1	2	2	2
tr|G1SCE5|G1SCE5_RABIT	LOC100342857	NAD(P)(+)--arginine ADP-ribosyltransferase OS=Oryctolagus cuniculus (Rabbit) GN=LOC100342857 PE=3 SV=2			0	0	0	0		0	0	0	0	Typical	1	1	1	1		0	0	0	0		0	0	0	0		0	0	0	0		0	0	0	0		0	0	0	0		0	0	0	0
tr|G1SYI6|G1SYI6_RABIT	ABI1	Uncharacterized protein OS=Oryctolagus cuniculus (Rabbit) GN=ABI1 PE=4 SV=1			0	0	0	0		0	0	0	0		0	0	0	0		0	0	0	0	Typical	1	1	1	1	Typical	1	2	2	2		0	0	0	0	Typical	1	2	2	2	Typical	1	1	1	1
tr|G1SH86|G1SH86_RABIT	TBCD	Uncharacterized protein OS=Oryctolagus cuniculus (Rabbit) GN=TBCD PE=4 SV=2			0	0	0	0		0	0	0	0		0	0	0	0		0	0	0	0		0	0	0	0		0	0	0	0		0	0	0	0		0	0	0	0	Typical	1	1	1	1
tr|G1T4N5|G1T4N5_RABIT	MTOR	Uncharacterized protein OS=Oryctolagus cuniculus (Rabbit) GN=MTOR PE=4 SV=2			0	0	0	0	Typical	1	1	1	1		0	0	0	0		0	0	0	0		0	0	0	0		0	0	0	0		0	0	0	0		0	0	0	0		0	0	0	0
tr|G1T4M1|G1T4M1_RABIT	LAMC1	Uncharacterized protein OS=Oryctolagus cuniculus (Rabbit) GN=LAMC1 PE=4 SV=2			0	0	0	0		0	0	0	0	Typical	1	1	1	1		0	0	0	0	Typical	1	1	1	1		0	0	0	0	Typical	1	1	1	1		0	0	0	0		0	0	0	0
tr|G1TKR7|G1TKR7_RABIT		Uncharacterized protein OS=Oryctolagus cuniculus (Rabbit) GN=EXOC7 PE=4 SV=1			0	0	0	0	Typical	1	1	1	1		0	0	0	0		0	0	0	0		0	0	0	0		0	0	0	0		0	0	0	0		0	0	0	0		0	0	0	0
tr|G1SVH0|G1SVH0_RABIT	AHCY	Adenosylhomocysteinase OS=Oryctolagus cuniculus (Rabbit) GN=AHCY PE=3 SV=2			0	0	0	0		0	0	0	0		0	0	0	0		0	0	0	0		0	0	0	0		0	0	0	0		0	0	0	0		0	0	0	0	Typical	1	1	1	1
tr|G1U1Q8|G1U1Q8_RABIT	MIF	Uncharacterized protein OS=Oryctolagus cuniculus (Rabbit) GN=MIF PE=4 SV=1			0	0	0	0		0	0	0	0		0	0	0	0	Typical	1	1	1	1		0	0	0	0		0	0	0	0		0	0	0	0		0	0	0	0		0	0	0	0
tr|G1SE57|G1SE57_RABIT	ARF4	Uncharacterized protein OS=Oryctolagus cuniculus (Rabbit) GN=ARF4 PE=3 SV=1			0	0	0	0		0	0	0	0	Typical	1	1	1	1		0	0	0	0		0	0	0	0		0	0	0	0		0	0	0	0		0	0	0	0		0	0	0	0
tr|G1T8Z0|G1T8Z0_RABIT	PRDX6				0	0	0	0		0	0	0	0		0	0	0	0		0	0	0	0		0	0	0	0		0	0	0	0		0	0	0	0		0	0	0	0	Typical	1	1	1	1
tr|G1SSK8|G1SSK8_RABIT	CS	Citrate synthase OS=Oryctolagus cuniculus (Rabbit) GN=CS PE=3 SV=1			0	0	0	0		0	0	0	0		0	0	0	0		0	0	0	0		0	0	0	0		0	0	0	0	Typical	1	1	1	1	Typical	1	2	2	2	Typical	1	2	2	2
tr|G1SWN1|G1SWN1_RABIT	SNF8	Uncharacterized protein OS=Oryctolagus cuniculus (Rabbit) GN=SNF8 PE=4 SV=1			0	0	0	0	Typical	1	1	1	1		0	0	0	0		0	0	0	0		0	0	0	0		0	0	0	0		0	0	0	0		0	0	0	0		0	0	0	0
tr|G1SPX9|G1SPX9_RABIT	HELB	Uncharacterized protein OS=Oryctolagus cuniculus (Rabbit) GN=HELB PE=4 SV=2			0	0	0	0		0	0	0	0	Typical	1	1	1	1		0	0	0	0		0	0	0	0		0	0	0	0		0	0	0	0		0	0	0	0		0	0	0	0
tr|G1SKC9|G1SKC9_RABIT	LOC100347754	Uncharacterized protein OS=Oryctolagus cuniculus (Rabbit) GN=LOC100347754 PE=4 SV=2			0	0	0	0	Typical	1	1	1	1		0	0	0	0		0	0	0	0		0	0	0	0		0	0	0	0		0	0	0	0		0	0	0	0	Typical	1	1	1	1
tr|G1T7Z0|G1T7Z0_RABIT	PGD	6-phosphogluconate dehydrogenase, decarboxylating OS=Oryctolagus cuniculus (Rabbit) GN=PGD PE=3 SV=2			0	0	0	0		0	0	0	0		0	0	0	0		0	0	0	0		0	0	0	0		0	0	0	0		0	0	0	0		0	0	0	0	Typical	1	1	1	1
tr|G1T3V3|G1T3V3_RABIT	RICTOR	Uncharacterized protein OS=Oryctolagus cuniculus (Rabbit) GN=RICTOR PE=4 SV=1			0	0	0	0		0	0	0	0		0	0	0	0		0	0	0	0		0	0	0	0		0	0	0	0	Typical	1	1	1	1		0	0	0	0		0	0	0	0
tr|G1SUA2|G1SUA2_RABIT		Uncharacterized protein OS=Oryctolagus cuniculus (Rabbit) GN=TMA7 PE=4 SV=1			0	0	0	0		0	0	0	0		0	0	0	0		0	0	0	0		0	0	0	0		0	0	0	0	Typical	1	2	2	2		0	0	0	0	Typical	1	1	1	1
tr|G1SHM7|G1SHM7_RABIT	KIF20B	Kinesin-like protein OS=Oryctolagus cuniculus (Rabbit) GN=KIF20B PE=3 SV=2			0	0	0	0		0	0	0	0		0	0	0	0		0	0	0	0		0	0	0	0	Typical	1	1	1	1		0	0	0	0		0	0	0	0		0	0	0	0
tr|G1SS07|G1SS07_RABIT	UBE2V2	Uncharacterized protein OS=Oryctolagus cuniculus (Rabbit) GN=UBE2V2 PE=4 SV=1			0	0	0	0		0	0	0	0		0	0	0	0		0	0	0	0		0	0	0	0		0	0	0	0		0	0	0	0	Typical	1	1	1	1	Typical	1	2	2	2
tr|G1SX00|G1SX00_RABIT	PSIP1	Uncharacterized protein OS=Oryctolagus cuniculus (Rabbit) GN=PSIP1 PE=4 SV=1			0	0	0	0	Typical	1	2	2	2		0	0	0	0		0	0	0	0	Typical	1	3	3	3	Typical	1	3	3	3	Typical	1	3	3	3		0	0	0	0	Typical	1	3	3	3
tr|B7NZP9|B7NZP9_RABIT	FLNA	Filamin A, alpha isoform 2 (Predicted) OS=Oryctolagus cuniculus (Rabbit) GN=FLNA PE=4 SV=1			0	0	0	0	Typical	1	1	1	1		0	0	0	0		0	0	0	0		0	0	0	0		0	0	0	0		0	0	0	0		0	0	0	0		0	0	0	0
tr|G1TBL0|G1TBL0_RABIT	BZW2	Uncharacterized protein OS=Oryctolagus cuniculus (Rabbit) GN=BZW2 PE=4 SV=2			0	0	0	0	Typical	1	1	1	1		0	0	0	0		0	0	0	0		0	0	0	0	Typical	1	1	1	1		0	0	0	0		0	0	0	0		0	0	0	0
tr|G1SYS6|G1SYS6_RABIT	ACYP1	Acylphosphatase OS=Oryctolagus cuniculus (Rabbit) GN=ACYP1 PE=3 SV=1			0	0	0	0		0	0	0	0		0	0	0	0		0	0	0	0		0	0	0	0		0	0	0	0	Typical	1	1	1	1		0	0	0	0		0	0	0	0
tr|G1SZT1|G1SZT1_RABIT	RBKS	Uncharacterized protein OS=Oryctolagus cuniculus (Rabbit) GN=RBKS PE=3 SV=2			0	0	0	0		0	0	0	0		0	0	0	0		0	0	0	0		0	0	0	0		0	0	0	0		0	0	0	0	Typical	1	1	1	1		0	0	0	0
tr|G1SHS7|G1SHS7_RABIT	WDR1	Uncharacterized protein OS=Oryctolagus cuniculus (Rabbit) GN=WDR1 PE=4 SV=1			0	0	0	0		0	0	0	0		0	0	0	0		0	0	0	0		0	0	0	0		0	0	0	0		0	0	0	0		0	0	0	0	Typical	1	1	1	1
tr|U3KPA0|U3KPA0_RABIT	TSNAX-DISC1	Uncharacterized protein OS=Oryctolagus cuniculus (Rabbit) GN=TSNAX PE=4 SV=1			0	0	0	0	Typical	1	1	1	1		0	0	0	0		0	0	0	0		0	0	0	0		0	0	0	0		0	0	0	0		0	0	0	0		0	0	0	0
tr|G1TPB9|G1TPB9_RABIT	ABTB1	Uncharacterized protein OS=Oryctolagus cuniculus (Rabbit) GN=ABTB1 PE=4 SV=1			0	0	0	0	Typical	1	1	1	1		0	0	0	0		0	0	0	0		0	0	0	0		0	0	0	0		0	0	0	0		0	0	0	0		0	0	0	0
tr|A1BN59|A1BN59_RABIT		5'-nucleotidase OS=Oryctolagus cuniculus (Rabbit) PE=2 SV=1			0	0	0	0		0	0	0	0		0	0	0	0		0	0	0	0		0	0	0	0		0	0	0	0		0	0	0	0		0	0	0	0	Typical	1	1	1	1
sp|Q9N1E2|G6PI_RABIT	GPI	Glucose-6-phosphate isomerase OS=Oryctolagus cuniculus (Rabbit) GN=GPI PE=1 SV=3			0	0	0	0		0	0	0	0		0	0	0	0		0	0	0	0		0	0	0	0		0	0	0	0		0	0	0	0		0	0	0	0	Typical	1	1	1	1
sp|Q29504|UBA1_RABIT	UBA1 UBE1	Ubiquitin-like modifier-activating enzyme 1 OS=Oryctolagus cuniculus (Rabbit) GN=UBA1 PE=2 SV=1			0	0	0	0		0	0	0	0		0	0	0	0		0	0	0	0		0	0	0	0		0	0	0	0		0	0	0	0		0	0	0	0	Typical	1	1	1	1
sp|P80912|HINT1_RABIT	HINT1 HINT	Histidine triad nucleotide-binding protein 1 OS=Oryctolagus cuniculus (Rabbit) GN=HINT1 PE=1 SV=2			0	0	0	0	Typical	1	1	1	1		0	0	0	0		0	0	0	0		0	0	0	0		0	0	0	0		0	0	0	0		0	0	0	0		0	0	0	0
tr|G1SFJ9|G1SFJ9_RABIT	CIAO1	Probable cytosolic iron-sulfur protein assembly protein CIAO1 OS=Oryctolagus cuniculus (Rabbit) GN=CIAO1 PE=3 SV=1			0	0	0	0	Typical	1	1	1	1		0	0	0	0		0	0	0	0		0	0	0	0		0	0	0	0		0	0	0	0		0	0	0	0		0	0	0	0
sp|P12337|EST1_RABIT		Liver carboxylesterase 1 OS=Oryctolagus cuniculus (Rabbit) PE=1 SV=3			0	0	0	0		0	0	0	0		0	0	0	0		0	0	0	0		0	0	0	0		0	0	0	0	Typical	1	1	1	1		0	0	0	0		0	0	0	0
tr|G1T252|G1T252_RABIT	LSM14A	Uncharacterized protein OS=Oryctolagus cuniculus (Rabbit) GN=LSM14A PE=4 SV=1			0	0	0	0		0	0	0	0		0	0	0	0		0	0	0	0		0	0	0	0	Typical	1	1	1	1		0	0	0	0		0	0	0	0		0	0	0	0
tr|G1T3Y3|G1T3Y3_RABIT	C20orf27	Uncharacterized protein OS=Oryctolagus cuniculus (Rabbit) GN=C20orf27 PE=4 SV=2			0	0	0	0		0	0	0	0		0	0	0	0		0	0	0	0		0	0	0	0		0	0	0	0		0	0	0	0	Typical	1	1	1	1		0	0	0	0
tr|G1SCK9|G1SCK9_RABIT	SLC16A10	Uncharacterized protein OS=Oryctolagus cuniculus (Rabbit) GN=SLC16A10 PE=4 SV=1			0	0	0	0	Typical	1	1	1	1		0	0	0	0		0	0	0	0		0	0	0	0		0	0	0	0		0	0	0	0		0	0	0	0		0	0	0	0
tr|G1SPK0|G1SPK0_RABIT	PEF1	Uncharacterized protein OS=Oryctolagus cuniculus (Rabbit) GN=PEF1 PE=4 SV=2			0	0	0	0		0	0	0	0		0	0	0	0		0	0	0	0		0	0	0	0		0	0	0	0	Typical	1	1	1	1		0	0	0	0		0	0	0	0
tr|G1SKX7|G1SKX7_RABIT	TRAF3IP3				0	0	0	0		0	0	0	0		0	0	0	0		0	0	0	0		0	0	0	0		0	0	0	0	Typical	1	1	1	1		0	0	0	0		0	0	0	0
tr|G1SVA1|G1SVA1_RABIT	XPO4				0	0	0	0		0	0	0	0		0	0	0	0		0	0	0	0		0	0	0	0		0	0	0	0		0	0	0	0		0	0	0	0	Typical	1	1	1	1
tr|G1SI29|G1SI29_RABIT	TUFM	Elongation factor Tu OS=Oryctolagus cuniculus (Rabbit) GN=TUFM PE=3 SV=1			0	0	0	0		0	0	0	0		0	0	0	0		0	0	0	0		0	0	0	0		0	0	0	0		0	0	0	0		0	0	0	0	Typical	1	1	1	1
tr|G1T442|G1T442_RABIT	GCLC	Uncharacterized protein OS=Oryctolagus cuniculus (Rabbit) GN=GCLC PE=4 SV=1			0	0	0	0		0	0	0	0		0	0	0	0		0	0	0	0		0	0	0	0		0	0	0	0		0	0	0	0		0	0	0	0	Typical	1	1	1	1
tr|G1SHF1|G1SHF1_RABIT	PFDN2	Uncharacterized protein OS=Oryctolagus cuniculus (Rabbit) GN=PFDN2 PE=4 SV=1			0	0	0	0		0	0	0	0		0	0	0	0		0	0	0	0		0	0	0	0		0	0	0	0		0	0	0	0		0	0	0	0	Typical	1	1	1	1
tr|G1TEG8|G1TEG8_RABIT	PDCD6IP	Uncharacterized protein OS=Oryctolagus cuniculus (Rabbit) GN=PDCD6IP PE=4 SV=1			0	0	0	0		0	0	0	0		0	0	0	0		0	0	0	0		0	0	0	0		0	0	0	0		0	0	0	0		0	0	0	0	Typical	1	1	1	1
[truncated: 16 more columns]

## Sheet: Statistics S46
nanoLC-MSMS RESULTS: proteins
Validation at FDR<1% (False-Discovery Rate)
LEGEND:		Score				Mascot Score: Mascot is the algorithm used for database searching (probability score: the higher it is, the more probable is the presence of a given protein in the sample)
		Proteins				Number of protein accessions that are identified for this set of peptide (sameset, subset). Samesets are accessions that share all the peptides identified. Subsets are accessions that share some peptides only
		is validated				TRUE= passes the False positive rate filter
		Peptides				Number of peptides identified for this protein. One sequence with and one sequence without modification count for 2 different peptides
		#peptide_matches				Spectral count
		Spectral Count				Number of fragmentation MS/MS spectra observed for a given protein (MS/MS spectra are those on which you can read the amino acids sequence of a given peptide)
						Needed for "Spectral Count" quantification: this method gives you an idea about how a given protein is abundant in your mixture (the higher the number of spectra is, the most abundant your protein is)
		#specific_peptide_matches				Number of spectra not shared with another protein from the database
		#sequences				a peptidic sequence : only the aminoacid sequence matters (One sequence with and one sequence without modification count for 1)
		# spectra (BASIC Spectral Count)				= 1 spectrum
		# spectra (BASIC Spectral Count)				= 2-5 spectra
		# spectra (BASIC Spectral Count)				= 6-10 spectra
		# spectra (BASIC Spectral Count)				= 11-30 spectra
		# spectra (BASIC Spectral Count)				>= 31 spectra
Total number of identified proteins:
				2018_S46_GMP-PNP
Sample				A3_1					A3_2					A3_3					A11_1					A11_2					A11_3					Globin_1					Globin_2					Globin_3
Total number of proteins identified by Mascot in Uniprot_RABIT and validated at FDR<1% by Proline (ProFI consortium)						602					673					608					583					567					528					603					590					603
Total number of spectra identified by Mascot in Uniprot_RABIT and validated at FDR<1% by Proline (ProFI consortium)						14761					15939					15357					16842					17687					16130					15614					15697					15144
contaminants
sp|P02769|ALBU_BOVIN	ALB			Typical	45	215	197	214.459	Typical	38	181	162	180.304	Typical	35	152	134	151.381	Typical	31	154	135	153.149	Typical	39	179	163	178.691	Typical	30	114	105	113.923	Typical	37	205	192	204.845	Typical	33	174	157	173.613	Typical	30	140	127	139.691
sp|P00761|TRYP_PIG				Typical	7	41	41	41	Typical	6	36	36	36	Typical	7	38	38	38	Typical	4	38	38	38	Typical	5	43	43	43	Typical	7	41	41	41	Typical	4	38	38	38	Typical	4	38	38	38	Typical	4	34	34	34
Proteins identified with FDR<1%:
				2018_S46_GMP-PNP
				Basic Spectral Counting
Accession	ProtRibosomale ?	Description		A3_1					A3_2					A3_3					A11_1					A11_2					A11_3					Globin_1					Globin_2					Globin_3
Protein Set		Overview		Status F016000_1	Peptides Count F016000_1	Basic SC F016000_1	Specific SC F016000_1	Weighted SC F016000_1	Status F016002_2	Peptides Count F016002_2	Basic SC F016002_2	Specific SC F016002_2	Weighted SC F016002_2	Status F016006_3	Peptides Count F016006_3	Basic SC F016006_3	Specific SC F016006_3	Weighted SC F016006_3	Status F016008_4	Peptides Count F016008_4	Basic SC F016008_4	Specific SC F016008_4	Weighted SC F016008_4	Status F016009_5	Peptides Count F016009_5	Basic SC F016009_5	Specific SC F016009_5	Weighted SC F016009_5	Status F016012_6	Peptides Count F016012_6	Basic SC F016012_6	Specific SC F016012_6	Weighted SC F016012_6	Status F016013_7	Peptides Count F016013_7	Basic SC F016013_7	Specific SC F016013_7	Weighted SC F016013_7	Status F016014_8	Peptides Count F016014_8	Basic SC F016014_8	Specific SC F016014_8	Weighted SC F016014_8	Status F016016_9	Peptides Count F016016_9	Basic SC F016016_9	Specific SC F016016_9	Weighted SC F016016_9
tr|G1T8W7|G1T8W7_RABIT	ATP6V0A1	V-type proton ATPase subunit a OS=Oryctolagus cuniculus (Rabbit) GN=ATP6V0A1 PE=3 SV=2		Typical	6	7	7	7	Typical	4	5	5	5	Typical	4	4	4	4	Typical	2	2	2	2	Typical	2	2	2	2	Typical	2	3	3	3		0	0	0	0		0	0	0	0		0	0	0	0
tr|G1TGK9|G1TGK9_RABIT	DHX9	Uncharacterized protein OS=Oryctolagus cuniculus (Rabbit) GN=DHX9 PE=4 SV=1		Typical	34	54	54	54	Typical	27	49	49	49	Typical	28	48	48	48	Typical	25	52	52	52	Typical	25	68	68	68	Typical	24	63	63	63	Typical	11	20	20	20	Typical	10	23	23	23	Typical	11	17	17	17
tr|G1SSL4|G1SSL4_RABIT	EIF2AK2 eIF2aK2	Uncharacterized protein OS=Oryctolagus cuniculus (Rabbit) GN=EIF2AK2 PE=3 SV=1		Typical	5	7	7	7	Typical	4	6	6	6	Typical	4	5	5	5	Typical	11	17	17	17	Typical	7	10	10	10	Typical	3	4	4	4		0	0	0	0		0	0	0	0		0	0	0	0
tr|G1TEY6|G1TEY6_RABIT	GTPBP1	Uncharacterized protein OS=Oryctolagus cuniculus (Rabbit) GN=GTPBP1 PE=4 SV=1		Typical	22	57	57	57	Typical	22	52	52	52	Typical	18	43	43	43	Typical	17	48	48	48	Typical	20	48	48	48	Typical	18	51	51	51	Typical	13	27	27	27	Typical	8	19	19	19	Typical	7	14	14	14
tr|U3KMX6|U3KMX6_RABIT	BTF3	Transcription factor BTF3 OS=Oryctolagus cuniculus (Rabbit) GN=BTF3 PE=3 SV=1		Sameset	5	8	8	8	Typical	6	8	8	8	Typical	7	9	9	9	Typical	8	12	12	12	Typical	8	12	12	12	Typical	7	14	14	14	Sameset	2	3	3	3	Sameset	2	2	2	2	Sameset	2	3	3	3
sp|P50117|S10A9_RABIT	S100A9 MRP14	Protein S100-A9 OS=Oryctolagus cuniculus (Rabbit) GN=S100A9 PE=2 SV=3		Typical	4	14	14	14	Typical	4	14	14	14	Typical	4	19	19	19	Typical	4	19	19	19	Typical	3	19	19	19	Typical	4	7	7	7	Typical	2	4	4	4	Typical	3	5	5	5	Typical	1	3	3	3
tr|G1SJS2|G1SJS2_RABIT	EIF2B1	Uncharacterized protein OS=Oryctolagus cuniculus (Rabbit) GN=EIF2B1 PE=3 SV=1		Typical	10	26	26	26	Typical	12	35	35	35	Typical	8	14	14	14	Typical	6	10	10	10	Typical	6	14	14	14	Typical	7	12	12	12	Typical	4	6	6	6	Typical	2	2	2	2	Typical	1	1	1	1
tr|G1T047|G1T047_RABIT	DICER1	Uncharacterized protein OS=Oryctolagus cuniculus (Rabbit) GN=DICER1 PE=4 SV=1		Typical	2	2	2	2	Typical	2	2	2	2	Typical	3	3	3	3	Typical	2	2	2	2	Typical	5	5	5	5	Typical	3	4	4	4		0	0	0	0		0	0	0	0		0	0	0	0
tr|G1TVY8|G1TVY8_RABIT	PELO	Protein pelota homolog OS=Oryctolagus cuniculus (Rabbit) GN=PELO PE=3 SV=1		Typical	7	8	8	8	Typical	6	7	7	7	Typical	5	6	6	6	Typical	6	9	9	9	Typical	3	5	5	5	Typical	5	7	7	7	Typical	1	1	1	1	Typical	1	2	2	2		0	0	0	0
sp|Q28690|EI2BB_RABIT	EIF2B2	Translation initiation factor eIF-2B subunit beta OS=Oryctolagus cuniculus (Rabbit) GN=EIF2B2 PE=1 SV=1		Typical	4	9	9	9	Typical	8	16	16	16	Typical	4	6	6	6	Typical	6	8	8	8	Typical	4	9	9	9	Typical	3	6	6	6	Typical	2	2	2	2	Typical	1	1	1	1	Typical	1	1	1	1
tr|G1SLW8|G1SLW8_RABIT	EIF3M	Eukaryotic translation initiation factor 3 subunit M OS=Oryctolagus cuniculus (Rabbit) GN=EIF3M PE=1 SV=2		Typical	14	38	38	38	Typical	13	35	35	35	Typical	13	33	33	33	Typical	11	23	23	23	Typical	12	35	35	35	Typical	14	31	31	31	Typical	9	17	17	17	Typical	9	16	16	16	Typical	6	8	8	8
tr|G1T057|G1T057_RABIT	TTC37	Uncharacterized protein OS=Oryctolagus cuniculus (Rabbit) GN=TTC37 PE=4 SV=2		Typical	5	6	6	6	Typical	12	15	15	15	Typical	8	11	11	11	Typical	10	14	14	14	Typical	5	8	8	8	Typical	7	9	9	9	Typical	2	2	2	2	Typical	3	3	3	3	Typical	3	3	3	3
tr|U3KMB3|U3KMB3_RABIT	PARP9	Uncharacterized protein OS=Oryctolagus cuniculus (Rabbit) GN=PARP9 PE=4 SV=1		Sameset	8	10	10	10	Typical	7	8	8	8	Sameset	4	6	6	6	Sameset	7	9	9	9	Sameset	4	6	6	6	Sameset	3	4	4	4	Sameset	2	3	3	3		0	0	0	0		0	0	0	0
tr|G1T1R9|G1T1R9_RABIT	EXOC4	Uncharacterized protein OS=Oryctolagus cuniculus (Rabbit) GN=EXOC4 PE=4 SV=1		Typical	9	12	12	12	Typical	7	10	10	10	Typical	5	7	7	7	Typical	6	9	9	9	Typical	8	11	11	11	Typical	6	9	9	9	Typical	2	3	3	3	Typical	3	4	4	4	Typical	1	1	1	1
tr|G1T239|G1T239_RABIT	ATP6V0D1	Uncharacterized protein OS=Oryctolagus cuniculus (Rabbit) GN=ATP6V0D1 PE=4 SV=1		Typical	3	3	3	3	Typical	2	4	4	4	Typical	3	5	5	5	Typical	2	2	2	2	Typical	1	1	1	1	Typical	2	5	5	5		0	0	0	0		0	0	0	0		0	0	0	0
tr|G1SXG6|G1SXG6_RABIT	S100A8	Protein S100 OS=Oryctolagus cuniculus (Rabbit) GN=S100A8 PE=3 SV=1		Typical	6	23	23	23	Typical	6	19	19	19	Typical	7	22	22	22	Typical	5	16	16	16	Typical	6	17	17	17	Typical	5	17	17	17	Typical	3	12	12	12	Typical	3	6	6	6	Typical	2	3	3	3
tr|G1SIV3|G1SIV3_RABIT	FECH	Ferrochelatase OS=Oryctolagus cuniculus (Rabbit) GN=FECH PE=3 SV=2		Typical	9	17	17	17	Typical	7	12	12	12	Typical	6	12	12	12	Typical	5	10	10	10	Typical	4	8	8	8	Typical	5	13	13	13	Typical	3	4	4	4	Typical	3	4	4	4	Typical	2	2	2	2
tr|G1SE01|G1SE01_RABIT	EXOC5	Uncharacterized protein OS=Oryctolagus cuniculus (Rabbit) GN=EXOC5 PE=4 SV=1		Typical	7	14	14	14	Typical	6	7	7	7	Typical	5	8	8	8	Typical	4	5	5	5	Typical	4	8	8	8	Typical	7	10	10	10	Typical	3	3	3	3	Typical	2	2	2	2	Typical	1	1	1	1
tr|G1TQ31|G1TQ31_RABIT	CSNK2A1	Casein kinase II subunit alpha OS=Oryctolagus cuniculus (Rabbit) GN=CSNK2A1 PE=4 SV=1		Typical	3	3	3	3	Typical	2	2	2	2	Typical	2	2	2	2	Typical	3	4	4	4	Typical	1	1	1	1	Typical	1	2	2	2		0	0	0	0		0	0	0	0		0	0	0	0
tr|G1T7S6|G1T7S6_RABIT	FMR1	Uncharacterized protein OS=Oryctolagus cuniculus (Rabbit) GN=FMR1 PE=4 SV=1		Typical	10	25	23	23.5114	Typical	9	23	22	22.2557	Typical	9	20	19	19.2557	Typical	5	15	15	15	Typical	7	22	20	20.5114	Typical	6	18	16	16.5114	Typical	5	11	9	9.51136	Typical	4	11	9	9.51136	Typical	3	4	2	2.51136
tr|G1U446|G1U446_RABIT	CLINT1	Uncharacterized protein OS=Oryctolagus cuniculus (Rabbit) GN=CLINT1 PE=4 SV=2		Typical	4	6	6	6	Typical	5	10	10	10	Typical	2	2	2	2	Typical	3	4	4	4	Typical	3	4	4	4	Typical	2	2	2	2		0	0	0	0	Typical	1	1	1	1		0	0	0	0
tr|G1SEX6|G1SEX6_RABIT	DHX36	Uncharacterized protein OS=Oryctolagus cuniculus (Rabbit) GN=DHX36 PE=4 SV=1		Typical	4	6	5	6	Typical	3	4	4	4	Typical	2	2	2	2	Typical	1	2	2	2	Typical	1	2	2	2	Typical	1	2	2	2		0	0	0	0		0	0	0	0		0	0	0	0
tr|G1TM86|G1TM86_RABIT	GNL1	Uncharacterized protein OS=Oryctolagus cuniculus (Rabbit) GN=GNL1 PE=4 SV=1		Typical	9	12	12	12	Typical	5	9	9	9	Typical	4	9	9	9	Typical	5	9	9	9	Typical	4	8	8	8	Typical	3	4	4	4	Typical	1	1	1	1	Typical	1	2	2	2	Typical	1	3	3	3
sp|P47823|EI2BE_RABIT	EIF2B5	Translation initiation factor eIF-2B subunit epsilon OS=Oryctolagus cuniculus (Rabbit) GN=EIF2B5 PE=1 SV=1		Typical	11	22	22	22	Typical	11	32	32	32	Typical	8	16	16	16	Typical	7	16	16	16	Typical	9	18	18	18	Typical	7	16	16	16	Typical	7	11	11	11	Typical	4	9	9	9	Typical	3	4	4	4
tr|B7NZF4|B7NZF4_RABIT	HYPK	Huntingtin interacting protein K (Predicted) OS=Oryctolagus cuniculus (Rabbit) GN=HYPK PE=4 SV=1			0	0	0	0	Typical	2	12	12	12	Typical	2	9	9	9	Typical	1	6	6	6	Typical	1	3	3	3	Typical	1	3	3	3	Typical	1	2	2	2		0	0	0	0		0	0	0	0
tr|G1SGB7|G1SGB7_RABIT	MAGOH	Uncharacterized protein OS=Oryctolagus cuniculus (Rabbit) GN=MAGOH PE=4 SV=1		Typical	3	8	8	8	Typical	3	6	6	6	Typical	3	5	5	5	Typical	2	5	5	5	Typical	3	7	7	7	Typical	3	6	6	6		0	0	0	0	Typical	2	3	3	3	Typical	2	2	2	2
tr|G1SGJ5|G1SGJ5_RABIT	CNOT9	Uncharacterized protein OS=Oryctolagus cuniculus (Rabbit) GN=RQCD1 PE=4 SV=1		Typical	4	7	7	7	Typical	2	6	6	6	Typical	4	7	7	7	Typical	4	9	9	9	Typical	3	5	5	5	Typical	1	2	2	2		0	0	0	0	Typical	1	2	2	2	Typical	1	2	2	2
sp|P0CL18|EIF2D_RABIT	EIF2D	Eukaryotic translation initiation factor 2D OS=Oryctolagus cuniculus (Rabbit) GN=EIF2D PE=1 SV=1		Typical	4	5	5	5	Typical	4	4	4	4	Typical	4	4	4	4		0	0	0	0	Typical	1	1	1	1		0	0	0	0		0	0	0	0		0	0	0	0		0	0	0	0
tr|G1SED9|G1SED9_RABIT	EIF3L	Uncharacterized protein OS=Oryctolagus cuniculus (Rabbit) GN=EIF3L PE=1 SV=1		Typical	13	19	19	19	Typical	12	16	16	16	Typical	10	17	17	17	Typical	4	6	6	6	Typical	4	8	8	8	Typical	4	5	5	5	Typical	5	6	6	6	Typical	2	3	3	3	Typical	4	5	5	5
tr|G1SFV7|G1SFV7_RABIT	DDB1	Uncharacterized protein OS=Oryctolagus cuniculus (Rabbit) GN=DDB1 PE=4 SV=1		Typical	9	10	10	10	Typical	5	6	6	6	Typical	6	8	8	8	Typical	4	4	4	4		0	0	0	0	Typical	2	2	2	2	Typical	2	2	2	2	Typical	1	1	1	1	Typical	1	1	1	1
tr|G1TUU3|G1TUU3_RABIT	ZNFX1	Uncharacterized protein OS=Oryctolagus cuniculus (Rabbit) GN=ZNFX1 PE=4 SV=1		Typical	28	38	38	38	Typical	25	36	36	36	Typical	19	25	25	25	Typical	17	21	21	21	Typical	11	15	15	15	Typical	8	10	10	10	Typical	8	8	8	8	Typical	9	9	9	9	Typical	5	6	6	6
tr|G1U383|G1U383_RABIT	DHX29	Uncharacterized protein OS=Oryctolagus cuniculus (Rabbit) GN=DHX29 PE=4 SV=1		Typical	31	52	51	52	Typical	27	50	50	50	Typical	28	51	51	51	Typical	20	29	29	29	Typical	18	30	30	30	Typical	14	27	27	27	Typical	14	22	22	22	Typical	12	15	15	15	Typical	8	10	10	10
tr|G1TTY7|G1TTY7_RABIT	RPL18A	Uncharacterized protein OS=Oryctolagus cuniculus (Rabbit) GN=RPL18A PE=3 SV=1		Typical	7	45	45	45	Typical	10	46	46	46	Typical	9	48	48	48	Typical	11	55	55	55	Typical	9	53	53	53	Typical	13	77	77	77	Typical	7	31	31	31	Typical	7	24	24	24	Typical	7	24	24	24
tr|B2ZDY6|B2ZDY6_RABIT	CCT1	T-complex protein 1 subunit alpha OS=Oryctolagus cuniculus (Rabbit) PE=2 SV=1		Typical	2	2	2	2	Typical	13	24	24	24	Typical	12	16	16	16	Typical	6	8	8	8	Typical	5	7	7	7	Typical	3	4	4	4	Typical	12	27	27	27	Typical	14	34	34	34	Typical	15	30	30	30
tr|Q6R8J5|Q6R8J5_RABIT	CCT3	Chaperonin-containing TCP-1 subunit gamma OS=Oryctolagus cuniculus (Rabbit) GN=CCT3 PE=2 SV=1		Subset	3	5	0	0.25	Typical	8	13	1	1.6	Subset	5	9	0	0.45	Typical	3	5	2	2.15	Subset	2	3	0	0.15	Subset	2	2	0	0.1	Typical	8	12	1	1.55	Typical	9	20	1	1.95	Typical	9	15	1	1.7
tr|G1SRW8|G1SRW8_RABIT	SLFN14	Uncharacterized protein OS=Oryctolagus cuniculus (Rabbit) GN=SLFN14 PE=4 SV=2		Typical	6	7	7	7	Typical	10	15	15	15	Typical	8	10	10	10	Typical	10	17	17	17	Typical	13	24	24	24	Typical	12	26	26	26	Typical	27	68	68	68	Typical	20	51	51	51	Typical	21	60	60	60
tr|G1SZ91|G1SZ91_RABIT	FABP5	Uncharacterized protein OS=Oryctolagus cuniculus (Rabbit) GN=FABP5 PE=4 SV=2			0	0	0	0		0	0	0	0		0	0	0	0	Typical	1	1	1	1		0	0	0	0		0	0	0	0	Typical	1	4	4	4	Typical	1	5	5	5	Typical	1	4	4	4
tr|G1TA11|G1TA11_RABIT	RARS	Uncharacterized protein OS=Oryctolagus cuniculus (Rabbit) GN=RARS PE=3 SV=2		Typical	9	11	11	11	Typical	2	2	2	2	Typical	6	6	6	6	Typical	7	8	8	8	Typical	3	4	4	4	Typical	2	3	3	3	Typical	16	31	31	31	Typical	13	23	23	23	Typical	11	18	18	18
tr|G1U1M3|G1U1M3_RABIT	AIMP1	Uncharacterized protein OS=Oryctolagus cuniculus (Rabbit) GN=AIMP1 PE=4 SV=2		Typical	2	2	2	2	Typical	1	1	1	1		0	0	0	0	Typical	1	2	2	2	Typical	1	1	1	1		0	0	0	0	Typical	5	13	13	13	Typical	5	13	13	13	Typical	4	10	10	10
sp|Q9TTC6|PPIA_RABIT	PPIA	Peptidyl-prolyl cis-trans isomerase A OS=Oryctolagus cuniculus (Rabbit) GN=PPIA PE=2 SV=3		Typical	4	5	3	4.21212	Typical	5	13	9	11.4242	Typical	5	7	3	5.42424	Typical	5	10	7	8.81818	Typical	4	7	5	6.21212	Typical	5	6	2	4.42424	Typical	6	20	14	17.6364	Typical	6	22	14	18.8485	Typical	6	33	23	29.0606
sp|P46406|G3P_RABIT	GAPDH GAPD	Glyceraldehyde-3-phosphate dehydrogenase OS=Oryctolagus cuniculus (Rabbit) GN=GAPDH PE=1 SV=3		Subset	2	3	0	0.166667	Subset	2	3	0	0.166667	Subset	2	3	0	0.166667	Subset	2	4	0	0.222222	Subset	2	4	0	0.222222	Subset	1	2	0	0.111111	Subset	6	13	0	0.722222	Subset	7	14	0	0.777778	Typical	9	18	1	1.94444
tr|G1TJG6|G1TJG6_RABIT	GAPDH	Glyceraldehyde-3-phosphate dehydrogenase OS=Oryctolagus cuniculus (Rabbit) GN=GAPDH PE=3 SV=1		Typical	3	4	1	3.83333	Typical	3	5	2	4.83333	Typical	3	4	1	3.83333	Typical	3	6	2	5.77778	Typical	3	6	2	5.77778	Typical	2	3	1	2.88889	Typical	7	15	2	14.2778	Typical	8	18	4	17.2222	Typical	9	19	2	18.0556
sp|P07452|CAH1_RABIT	CA1	Carbonic anhydrase 1 OS=Oryctolagus cuniculus (Rabbit) GN=CA1 PE=2 SV=1		Subset	2	3	0	1.10526	Typical	4	9	2	4.57895	Subset	3	5	0	1.84211	Subset	2	3	0	1.10526	Subset	2	8	0	2.94737	Subset	3	7	0	2.57895	Typical	5	14	3	7.05263	Typical	5	17	7	10.6842	Typical	5	30	16	21.1579
tr|G1TAC4|G1TAC4_RABIT	GLRX	Glutaredoxin-1 OS=Oryctolagus cuniculus (Rabbit) GN=GLRX PE=4 SV=1			0	0	0	0		0	0	0	0		0	0	0	0		0	0	0	0		0	0	0	0		0	0	0	0	Sameset	1	2	2	2	Typical	2	3	3	3	Typical	2	6	6	6
sp|P00008|CYC_RABIT	CYCS CYC	Cytochrome c OS=Oryctolagus cuniculus (Rabbit) GN=CYCS PE=1 SV=2			0	0	0	0		0	0	0	0		0	0	0	0		0	0	0	0		0	0	0	0		0	0	0	0	Typical	3	5	5	5	Typical	2	4	4	4	Typical	1	1	1	1
tr|G1SJZ8|G1SJZ8_RABIT	CPOX	Uncharacterized protein OS=Oryctolagus cuniculus (Rabbit) GN=CPOX PE=4 SV=1			0	0	0	0		0	0	0	0		0	0	0	0		0	0	0	0		0	0	0	0		0	0	0	0	Typical	1	1	1	1	Typical	4	5	5	5	Typical	3	3	3	3
tr|G1SIV7|G1SIV7_RABIT	NARS	Uncharacterized protein OS=Oryctolagus cuniculus (Rabbit) GN=NARS PE=3 SV=1			0	0	0	0		0	0	0	0		0	0	0	0		0	0	0	0		0	0	0	0		0	0	0	0	Typical	1	1	1	1	Typical	2	4	4	4	Typical	3	4	4	4
tr|G1SSX5|G1SSX5_RABIT	MARS	Uncharacterized protein OS=Oryctolagus cuniculus (Rabbit) GN=MARS PE=3 SV=2		Typical	5	5	5	5	Typical	4	5	5	5	Typical	4	4	4	4	Typical	5	6	6	6	Typical	4	5	5	5	Typical	2	2	2	2	Typical	7	13	13	13	Typical	8	13	13	13	Typical	8	10	10	10
tr|G1SIB6|G1SIB6_RABIT	BLVRB	Uncharacterized protein OS=Oryctolagus cuniculus (Rabbit) GN=BLVRB PE=4 SV=2		Typical	2	2	2	2	Typical	2	4	4	4	Typical	2	2	2	2	Typical	1	5	5	5	Typical	1	3	3	3	Typical	2	4	4	4	Typical	3	9	9	9	Typical	4	11	11	11	Typical	5	13	13	13
sp|P23612|SYWC_RABIT	WARS	Tryptophan--tRNA ligase, cytoplasmic OS=Oryctolagus cuniculus (Rabbit) GN=WARS PE=2 SV=3		Typical	4	5	5	5	Typical	3	6	6	6	Typical	4	8	8	8	Typical	3	8	8	8	Typical	5	10	10	10	Typical	2	5	5	5	Typical	6	14	14	14	Typical	7	17	17	17	Typical	8	18	18	18
tr|G1SN52|G1SN52_RABIT	XPO7	Uncharacterized protein OS=Oryctolagus cuniculus (Rabbit) GN=XPO7 PE=4 SV=1			0	0	0	0		0	0	0	0		0	0	0	0		0	0	0	0		0	0	0	0		0	0	0	0	Typical	1	2	2	2	Typical	2	3	3	3	Typical	1	1	1	1
tr|G1SKP2|G1SKP2_RABIT	IPO5	Uncharacterized protein OS=Oryctolagus cuniculus (Rabbit) GN=IPO5 PE=4 SV=1			0	0	0	0	Typical	1	1	1	1		0	0	0	0	Typical	1	1	1	1	Typical	1	1	1	1		0	0	0	0	Typical	3	4	4	4	Typical	3	5	5	5	Typical	2	3	3	3
tr|G1SVP7|G1SVP7_RABIT	GSTO1	Uncharacterized protein OS=Oryctolagus cuniculus (Rabbit) GN=GSTO1 PE=4 SV=1			0	0	0	0	Typical	1	1	1	1	Typical	1	1	1	1	Typical	1	1	1	1	Typical	1	2	2	2	Typical	1	1	1	1	Typical	2	5	5	5	Typical	2	5	5	5	Typical	4	6	6	6
tr|G1T1U7|G1T1U7_RABIT	MTHFD1	Uncharacterized protein OS=Oryctolagus cuniculus (Rabbit) GN=MTHFD1 PE=3 SV=1			0	0	0	0		0	0	0	0		0	0	0	0		0	0	0	0		0	0	0	0		0	0	0	0		0	0	0	0	Typical	1	1	1	1	Typical	3	4	4	4
tr|U3KLX7|U3KLX7_RABIT	CUBN	Uncharacterized protein OS=Oryctolagus cuniculus (Rabbit) GN=RSU1 PE=4 SV=1			0	0	0	0		0	0	0	0		0	0	0	0		0	0	0	0		0	0	0	0		0	0	0	0	Typical	1	1	1	1	Typical	2	2	2	2	Typical	2	2	2	2
tr|G1SSK8|G1SSK8_RABIT	CS	Citrate synthase OS=Oryctolagus cuniculus (Rabbit) GN=CS PE=3 SV=1			0	0	0	0		0	0	0	0		0	0	0	0		0	0	0	0		0	0	0	0		0	0	0	0	Typical	1	1	1	1	Typical	1	2	2	2	Typical	1	2	2	2
sp|P00563|KCRM_RABIT	CKM	Creatine kinase M-type OS=Oryctolagus cuniculus (Rabbit) GN=CKM PE=1 SV=1		Typical	1	1	1	1		0	0	0	0	Typical	1	1	1	1		0	0	0	0	Typical	2	2	2	2		0	0	0	0	Typical	4	5	5	5	Typical	3	3	3	3	Typical	2	3	3	3
tr|G1SI79|G1SI79_RABIT	HNRNPA3	Uncharacterized protein OS=Oryctolagus cuniculus (Rabbit) GN=LOC100352496 PE=4 SV=1		Typical	2	3	3	3	Typical	1	1	1	1		0	0	0	0	Typical	1	2	2	2	Typical	1	2	2	2		0	0	0	0	Typical	2	5	5	5	Typical	2	5	5	5	Typical	2	5	5	5
tr|G1SFS8|G1SFS8_RABIT	SND1	Uncharacterized protein OS=Oryctolagus cuniculus (Rabbit) GN=SND1 PE=4 SV=2		Typical	9	16	16	16	Typical	10	18	18	18	Typical	13	22	22	22	Typical	11	22	22	22	Typical	9	20	20	20	Typical	9	15	15	15	Typical	19	43	43	43	Typical	13	33	33	33	Typical	13	32	32	32
tr|G1T2I4|G1T2I4_RABIT	EPRS	Uncharacterized protein OS=Oryctolagus cuniculus (Rabbit) GN=EPRS PE=3 SV=1		Typical	10	15	15	15	Typical	9	15	15	15	Typical	9	13	13	13	Typical	10	20	20	20	Typical	10	18	18	18	Typical	6	9	9	9	Typical	16	32	32	32	Typical	19	35	35	35	Typical	11	22	22	22
sp|P00919|CAH2_RABIT	CA2	Carbonic anhydrase 2 OS=Oryctolagus cuniculus (Rabbit) GN=CA2 PE=1 SV=3		Typical	4	9	9	9	Typical	8	17	17	17	Typical	6	14	14	14	Typical	7	23	23	23	Typical	9	33	33	33	Typical	7	17	17	17	Typical	10	40	40	40	Typical	8	36	36	36	Typical	9	45	45	45
tr|G1T6W7|G1T6W7_RABIT	CAT	Catalase OS=Oryctolagus cuniculus (Rabbit) GN=CAT PE=3 SV=2		Typical	12	24	22	23.9018	Typical	15	39	36	38.8528	Typical	13	26	23	25.8528	Typical	16	32	28	31.8037	Typical	14	35	33	34.9018	Typical	11	27	25	26.9018	Typical	16	39	33	38.7055	Typical	20	57	50	56.6564	Typical	24	71	60	70.4601
tr|G1SN31|G1SN31_RABIT	CA1	Carbonic anhydrase 1 OS=Oryctolagus cuniculus (Rabbit) GN=CA1 PE=4 SV=1		Typical	3	6	3	4.89474	Typical	4	11	4	8.42105	Typical	4	9	4	7.15789	Typical	3	8	5	6.89474	Typical	3	12	4	9.05263	Typical	4	11	4	8.42105	Typical	5	18	7	13.9474	Typical	4	17	7	13.3158	Typical	4	24	10	18.8421
tr|G1T5H8|G1T5H8_RABIT	EIF4B	Uncharacterized protein OS=Oryctolagus cuniculus (Rabbit) GN=EIF4B PE=4 SV=2		Typical	15	43	43	43	Typical	17	55	55	55	Typical	16	54	54	54	Typical	18	54	54	54	Typical	17	56	56	56	Typical	15	52	52	52	Typical	20	83	83	83	Typical	22	85	85	85	Typical	20	74	74	74
sp|O19048|PCBP1_RABIT	PCBP1	Poly(rC)-binding protein 1 OS=Oryctolagus cuniculus (Rabbit) GN=PCBP1 PE=2 SV=1		Typical	30	292	160	272.223	Typical	26	236	133	220.568	Typical	29	266	146	248.021	Typical	24	237	147	223.516	Typical	24	250	156	235.919	Typical	26	293	169	274.422	Typical	24	190	114	178.616	Typical	25	177	110	166.964	Typical	24	144	85	135.16
tr|G1SN05|G1SN05_RABIT	EIF4A2	Uncharacterized protein OS=Oryctolagus cuniculus (Rabbit) GN=EIF4A2 PE=3 SV=1		Typical	18	65	20	30.57	Typical	19	69	22	33.0405	Typical	20	64	22	31.8686	Typical	16	62	19	29.0994	Typical	20	78	19	32.8572	Typical	14	72	20	32.2147	Typical	20	105	25	43.7847	Typical	22	111	27	46.7236	Typical	18	86	18	33.9703
tr|G1SQJ2|G1SQJ2_RABIT	FOCAD	Uncharacterized protein OS=Oryctolagus cuniculus (Rabbit) GN=FOCAD PE=4 SV=2		Typical	29	46	46	46	Typical	22	37	37	37	Typical	20	35	35	35	Typical	25	43	43	43	Typical	29	54	54	54	Typical	14	29	29	29	Typical	11	19	19	19	Typical	14	20	20	20	Typical	17	24	24	24
tr|G1T3H5|G1T3H5_RABIT	EIF2B3	Uncharacterized protein OS=Oryctolagus cuniculus (Rabbit) GN=EIF2B3 PE=4 SV=1		Typical	12	33	33	33	Typical	17	49	49	49	Typical	10	28	28	28	Typical	9	31	31	31	Typical	9	37	37	37	Typical	8	34	34	34	Typical	8	23	23	23	Typical	5	19	19	19	Typical	5	11	11	11
sp|P29562|IF4A1_RABIT	EIF4A1	Eukaryotic initiation factor 4A-I OS=Oryctolagus cuniculus (Rabbit) GN=EIF4A1 PE=1 SV=2		Typical	26	138	63	126.973	Typical	30	140	65	128.527	Typical	28	142	65	131.63	Typical	25	142	68	131.431	Typical	29	162	70	147.618	Typical	21	156	57	143.103	Typical	30	195	77	175.569	Typical	31	216	87	195.532	Typical	28	178	72	161.422
tr|Q28698|Q28698_RABIT		Deadenylyl-beta-globin OS=Oryctolagus cuniculus (Rabbit) PE=3 SV=1		Typical	5	102	13	13.8151	Typical	5	129	5	6.13558	Typical	5	114	11	11.9433	Typical	4	111	3	3.98904	Typical	4	134	3	4.19968	Subset	3	117	0	1.07146	Typical	4	155	4	5.38285	Typical	4	164	3	4.4744	Typical	4	189	3	4.70335
tr|U3KNL5|U3KNL5_RABIT	EIF3F	Eukaryotic translation initiation factor 3 subunit F OS=Oryctolagus cuniculus (Rabbit) GN=EIF3F PE=1 SV=1		Typical	10	36	36	36	Typical	9	31	31	31	Typical	9	32	32	32	Typical	8	33	33	33	Typical	9	32	32	32	Typical	8	28	28	28	Typical	8	19	19	19	Typical	7	17	17	17	Typical	7	15	15	15
tr|G1SIW1|G1SIW1_RABIT	DHX15	Uncharacterized protein OS=Oryctolagus cuniculus (Rabbit) GN=DHX15 PE=4 SV=1		Typical	15	29	29	29	Typical	16	38	38	38	Typical	15	38	38	38	Typical	12	36	36	36	Typical	11	28	28	28	Typical	12	29	29	29	Typical	14	42	42	42	Typical	15	51	51	51	Typical	15	48	48	48
sp|Q5IH81|EIF3I_RABIT	EIF3I	Eukaryotic translation initiation factor 3 subunit I OS=Oryctolagus cuniculus (Rabbit) GN=EIF3I PE=2 SV=1		Typical	13	57	57	57	Typical	14	48	48	48	Typical	12	46	46	46	Typical	11	40	40	40	Typical	12	37	37	37	Typical	9	39	39	39	Typical	9	26	26	26	Typical	10	25	25	25	Typical	10	19	19	19
tr|G1U2V6|G1U2V6_RABIT	HSP90AB1 HSPCB	Uncharacterized protein OS=Oryctolagus cuniculus (Rabbit) GN=PCBP2 PE=4 SV=1		Typical	17	167	27	54.2602	Typical	19	133	23	45.0147	Typical	19	161	33	58.4958	Typical	18	125	27	48.0846	Typical	19	124	23	43.6918	Typical	16	156	25	50.1025	Typical	17	108	23	43.0079	Typical	18	91	16	33.7031	Typical	15	80	14	29.545
tr|G1TL06|G1TL06_RABIT	RPL3	Uncharacterized protein OS=Oryctolagus cuniculus (Rabbit) GN=RPL3 PE=1 SV=1		Typical	23	99	99	99	Typical	24	114	114	114	Typical	23	105	105	105	Typical	26	152	152	152	Typical	26	169	169	169	Typical	25	166	166	166	Typical	20	114	114	114	Typical	22	120	120	120	Typical	25	133	133	133
sp|P02057|HBB_RABIT	HBB1; HBB2	Hemoglobin subunit beta-1/2 OS=Oryctolagus cuniculus (Rabbit) GN=HBB1 PE=1 SV=2		Typical	22	521	369	520.095	Typical	25	728	521	726.742	Typical	24	644	472	642.956	Typical	23	736	536	734.892	Typical	23	728	504	726.668	Typical	23	709	529	707.822	Typical	21	800	547	798.469	Typical	22	935	667	933.366	Typical	22	1021	721	1019.12
tr|G1SI41|G1SI41_RABIT	PCBP3	Uncharacterized protein OS=Oryctolagus cuniculus (Rabbit) GN=PCBP3 PE=4 SV=2		Subset	9	140	0	0.516782	Typical	11	111	1	1.41734	Subset	10	128	0	0.483332	Subset	10	98	0	0.399708	Subset	10	100	0	0.389466	Subset	9	131	0	0.475877	Typical	10	85	1	1.3765	Subset	10	74	0	0.332809	Typical	10	68	2	2.29469
tr|G1SVW5|G1SVW5_RABIT	RPL4	Uncharacterized protein OS=Oryctolagus cuniculus (Rabbit) GN=RPL4 PE=1 SV=2		Typical	27	92	92	92	Typical	24	103	103	103	Typical	24	97	97	97	Typical	25	145	145	145	Typical	28	185	185	185	Typical	30	173	173	173	Typical	23	115	115	115	Typical	23	122	122	122	Typical	25	132	132	132
sp|P03988|IGHM_RABIT		Ig mu chain C region secreted form OS=Oryctolagus cuniculus (Rabbit) PE=2 SV=1		Typical	3	4	4	4	Typical	3	3	3	3	Typical	3	3	3	3	Typical	3	3	3	3		0	0	0	0	Typical	2	2	2	2		0	0	0	0		0	0	0	0		0	0	0	0
tr|G1U3G0|G1U3G0_RABIT	UBE2O	Uncharacterized protein OS=Oryctolagus cuniculus (Rabbit) GN=UBE2O PE=4 SV=1		Typical	6	10	10	10	Typical	7	9	9	9	Typical	5	7	7	7	Typical	4	6	6	6	Typical	3	5	5	5	Typical	4	6	6	6	Typical	1	2	2	2	Typical	1	2	2	2	Typical	1	1	1	1
tr|G1TDK0|G1TDK0_RABIT	MYL6	Uncharacterized protein OS=Oryctolagus cuniculus (Rabbit) GN=MYL6 PE=4 SV=1		Typical	5	10	10	10	Typical	8	13	13	13	Typical	5	14	14	14	Typical	6	10	10	10	Typical	4	10	10	10	Typical	5	7	7	7	Typical	3	5	5	5	Typical	2	2	2	2	Typical	2	4	4	4
tr|G1SUX5|G1SUX5_RABIT	PLCL2	Phosphoinositide phospholipase C OS=Oryctolagus cuniculus (Rabbit) GN=PLCL2 PE=4 SV=2		Typical	3	3	3	3	Typical	2	3	3	3	Typical	3	3	3	3	Typical	2	2	2	2	Typical	2	2	2	2		0	0	0	0		0	0	0	0		0	0	0	0		0	0	0	0
tr|G1T2T9|G1T2T9_RABIT	RAB5A	Uncharacterized protein OS=Oryctolagus cuniculus (Rabbit) GN=RAB5A PE=3 SV=1		Typical	4	4	2	2.30769	Typical	2	4	0	0.615385		0	0	0	0		0	0	0	0	Typical	2	3	1	1.30769	Typical	1	1	1	1		0	0	0	0		0	0	0	0		0	0	0	0
tr|U3KNN8|U3KNN8_RABIT	DIS3L2	Uncharacterized protein OS=Oryctolagus cuniculus (Rabbit) GN=DIS3L2 PE=4 SV=1		Typical	6	8	8	8	Typical	8	11	11	11	Typical	6	8	8	8	Typical	5	8	8	8	Typical	6	8	8	8	Typical	2	5	5	5	Typical	4	4	4	4	Typical	3	3	3	3	Typical	1	1	1	1
tr|G1SUC3|G1SUC3_RABIT	DCAF12	Uncharacterized protein OS=Oryctolagus cuniculus (Rabbit) GN=DCAF12 PE=4 SV=1		Typical	2	2	2	2	Typical	2	2	2	2	Typical	2	2	2	2	Typical	1	1	1	1	Typical	2	2	2	2	Typical	1	1	1	1		0	0	0	0		0	0	0	0		0	0	0	0
tr|G1TX81|G1TX81_RABIT	LGALS9	Galectin OS=Oryctolagus cuniculus (Rabbit) GN=LGALS9 PE=4 SV=2		Typical	5	10	10	10	Typical	3	4	4	4	Typical	5	7	7	7	Typical	3	5	5	5	Typical	2	2	2	2	Typical	2	5	5	5	Typical	1	2	2	2	Typical	1	1	1	1	Typical	1	1	1	1
tr|G1U7M4|G1U7M4_RABIT	RPS29	Uncharacterized protein OS=Oryctolagus cuniculus (Rabbit) GN=LOC100337712 PE=1 SV=1		Typical	4	32	32	32	Typical	5	29	29	29	Typical	5	33	33	33	Typical	3	24	24	24	Typical	4	24	24	24	Typical	4	16	16	16	Typical	3	13	13	13	Typical	2	12	12	12	Typical	2	11	11	11
tr|G1SS77|G1SS77_RABIT	SKIV2L	Uncharacterized protein OS=Oryctolagus cuniculus (Rabbit) GN=SKIV2L PE=4 SV=1		Typical	7	8	8	8	Typical	12	20	20	20	Typical	10	12	12	12	Typical	7	12	12	12	Typical	7	12	12	12	Typical	5	7	7	7	Typical	4	5	5	5	Typical	3	6	6	6	Typical	3	4	4	4
tr|G1T573|G1T573_RABIT	EIF4G2	Eukaryotic translation initiation factor 4 gamma 2 OS=Oryctolagus cuniculus (Rabbit) GN=EIF4G2 PE=4 SV=1		Typical	9	15	15	15	Typical	12	20	20	20	Typical	13	20	20	20	Typical	10	15	15	15	Typical	10	14	14	14	Typical	5	11	11	11	Typical	5	8	8	8	Typical	5	8	8	8	Typical	4	6	6	6
tr|G1TLJ2|G1TLJ2_RABIT	LOC100345459	Uncharacterized protein OS=Oryctolagus cuniculus (Rabbit) GN=LOC100345459 PE=3 SV=1			0	0	0	0	Sameset	1	1	0	0.5		0	0	0	0	Sameset	1	1	0	0.5	Subset	1	1	0	0.5		0	0	0	0	Typical	2	2	1	1.5	Typical	3	3	1	2	Typical	3	5	1	3
tr|G1TEQ0|G1TEQ0_RABIT	LOC100343444	Uncharacterized protein OS=Oryctolagus cuniculus (Rabbit) PE=4 SV=1		Sameset	2	2	2	2	Sameset	3	5	5	5		0	0	0	0	Sameset	2	4	4	4	Sameset	2	4	4	4	Sameset	2	2	2	2	Typical	4	10	10	10	Typical	3	7	7	7	Typical	4	6	6	6
tr|G1T8V6|G1T8V6_RABIT	HMBS	Uncharacterized protein OS=Oryctolagus cuniculus (Rabbit) GN=HMBS PE=3 SV=1			0	0	0	0	Typical	2	2	2	2		0	0	0	0	Typical	1	1	1	1	Typical	2	2	2	2	Typical	1	1	1	1	Typical	2	2	2	2	Typical	2	2	2	2	Typical	5	9	9	9
tr|G1SJZ4|G1SJZ4_RABIT	OLA1	Obg-like ATPase 1 OS=Oryctolagus cuniculus (Rabbit) GN=OLA1 PE=3 SV=2		Typical	3	5	5	5	Typical	3	4	4	4	Typical	2	3	3	3	Typical	4	6	6	6	Typical	4	5	5	5	Typical	5	7	7	7	Typical	8	11	11	11	Typical	7	14	14	14	Typical	6	7	7	7
tr|G8ZF33|G8ZF33_RABIT	HBA1	Alpha-globin 1 OS=Oryctolagus cuniculus (Rabbit) GN=HBA1 PE=3 SV=1		Typical	17	485	0	0	Typical	17	622	0	0	Typical	17	605	0	0	Typical	17	591	0	0	Typical	15	698	0	0	Typical	15	481	0	0	Typical	16	687	0	0	Typical	15	787	0	0	Typical	19	827	0	0
tr|G1U971|G1U971_RABIT	EIF3C	Eukaryotic translation initiation factor 3 subunit C OS=Oryctolagus cuniculus (Rabbit) GN=EIF3C PE=1 SV=1		Typical	21	50	50	50	Typical	20	45	45	45	Typical	22	42	42	42	Typical	16	44	44	44	Typical	15	46	46	46	Typical	15	33	33	33	Typical	15	33	33	33	Typical	13	28	28	28	Typical	10	19	19	19
sp|P01948|HBA_RABIT	HBB1/2	Hemoglobin subunit alpha-1/2 OS=Oryctolagus cuniculus (Rabbit) PE=1 SV=2		Typical	19	521	40	519.006	Typical	18	698	57	694.928	Typical	19	678	48	675.21	Typical	19	690	70	686.662	Typical	16	769	59	765.568	Typical	16	526	50	523.647	Typical	17	769	70	765.647	Typical	16	879	88	875.258	Typical	21	931	105	927.101
tr|G1SQ93|G1SQ93_RABIT	AGO2 EIF2C2	Protein argonaute-2 OS=Oryctolagus cuniculus (Rabbit) GN=AGO2 PE=3 SV=1		Typical	21	45	3	30.3	Typical	18	40	4	27.4	Typical	18	39	3	26.4	Typical	20	50	4	33.9	Typical	20	43	4	29.35	Typical	16	40	4	27.4	Typical	25	63	6	43.05	Typical	23	61	6	41.75	Typical	22	52	5	35.55
tr|G8ZF20|G8ZF20_RABIT	HBA1 HBA2	Alpha-globin 1 OS=Oryctolagus cuniculus (Rabbit) GN=HBA1 PE=3 SV=1		Typical	17	353	0	12.4882	Typical	18	509	2	15.5739	Typical	17	461	0	12.0066	Typical	18	543	0	15.6718	Typical	16	583	0	15.8077	Typical	16	411	0	18.0484	Typical	17	589	0	19.2161	Typical	16	659	0	19.4533	Typical	20	682	0	19.2488
tr|G1T6D1|G1T6D1_RABIT	RPL14 (InterPro)	Uncharacterized protein OS=Oryctolagus cuniculus (Rabbit) GN=RPL23 PE=1 SV=1		Typical	9	31	31	31	Typical	10	34	34	34	Typical	9	32	32	32	Typical	10	53	53	53	Typical	11	77	77	77	Typical	11	92	92	92	Typical	7	51	51	51	Typical	8	49	49	49	Typical	10	44	44	44
tr|G1T0N5|G1T0N5_RABIT	PURA	Uncharacterized protein OS=Oryctolagus cuniculus (Rabbit) GN=PURA PE=4 SV=1		Typical	9	28	19	25.3	Typical	10	23	21	22.4	Typical	9	22	20	21.4	Typical	7	18	16	17.4	Typical	8	22	22	22	Typical	9	23	20	22.1	Typical	8	15	15	15	Typical	7	12	12	12	Typical	7	10	9	9.7
sp|O77503|AGO2_RABIT	AGO2 EIF2C2	Protein argonaute-2 OS=Oryctolagus cuniculus (Rabbit) GN=AGO2 PE=1 SV=2		Typical	21	44	2	16.7	Typical	18	39	3	15.6	Typical	18	38	2	14.6	Typical	20	48	2	18.1	Typical	20	42	3	16.65	Typical	16	38	2	14.6	Typical	25	59	2	21.95	Typical	23	57	2	21.25	Typical	22	50	3	19.45
tr|G1SPU6|G1SPU6_RABIT	ACT (InterPro)	Actin, cytoplasmic 1 OS=Oryctolagus cuniculus (Rabbit) GN=ACTB PE=3 SV=2		Typical	7	14	5	10.3077	Typical	10	24	4	15.5	Typical	10	22	5	14.5385	Typical	10	24	5	15.7692	Typical	8	22	6	15.0385	Typical	7	19	4	12.4231	Typical	9	26	5	17	Typical	12	34	7	22.6923	Typical	12	34	7	22.4615
sp|P29751|ACTB_RABIT	ACTB	Actin, cytoplasmic 1 OS=Oryctolagus cuniculus (Rabbit) GN=ACTB PE=2 SV=1		Typical	8	14	3	7.56731	Typical	11	24	3	10.8125	Typical	11	21	3	9.58654	Typical	11	23	3	10.3558	Typical	9	21	3	9.89904	Typical	8	18	3	8.26442	Typical	10	24	3	10.5	Typical	14	33	4	15.0577	Typical	14	34	5	15.9135
tr|G1SMR7|G1SMR7_RABIT	RPL12	Uncharacterized protein OS=Oryctolagus cuniculus (Rabbit) GN=RPL12 PE=1 SV=1		Typical	8	36	36	36	Typical	8	43	43	43	Typical	10	45	45	45	Typical	10	71	71	71	Typical	12	86	86	86	Typical	11	74	74	74	Typical	8	54	54	54	Typical	9	59	59	59	Typical	9	61	61	61
tr|G1T916|G1T916_RABIT	EIF5A	Eukaryotic translation initiation factor 5A OS=Oryctolagus cuniculus (Rabbit) GN=LOC100338341 PE=3 SV=1		Typical	10	35	1	2.24667	Typical	11	37	1	2.32	Subset	10	35	0	1.28333	Typical	10	37	1	2.32	Typical	10	41	1	2.46667	Subset	8	26	0	0.953333	Typical	10	46	3	4.57667	Typical	10	49	2	3.72333	Typical	10	44	2	3.54
tr|G8ZF31|G8ZF31_RABIT	HBA1	Alpha-globin 1 OS=Oryctolagus cuniculus (Rabbit) GN=HBA1 PE=3 SV=1		Typical	15	152	1	30.5058	Typical	15	221	1	32.4983	Subset	14	198	0	27.7838	Subset	15	247	0	36.6667	Subset	14	242	0	36.6246	Subset	14	197	0	43.3045	Typical	15	248	1	46.1371	Subset	14	265	0	45.2886	Typical	18	275	2	46.6501
tr|G1T7F5|G1T7F5_RABIT	ADD2	Uncharacterized protein OS=Oryctolagus cuniculus (Rabbit) GN=ADD2 PE=4 SV=1		Typical	17	35	32	33.4568	Typical	16	31	28	29.4568	Typical	17	37	35	35.9712	Typical	14	34	34	34	Typical	13	24	24	24	Typical	11	23	20	21.4568	Typical	11	19	16	17.4568	Typical	10	17	14	15.4568	Typical	10	18	16	16.9712
tr|G1SMK8|G1SMK8_RABIT	BAG2	Uncharacterized protein OS=Oryctolagus cuniculus (Rabbit) GN=BAG2 PE=4 SV=1		Typical	2	3	3	3	Typical	2	3	3	3	Typical	2	4	4	4	Typical	1	2	2	2		0	0	0	0	Typical	2	4	4	4		0	0	0	0		0	0	0	0	Typical	1	1	1	1
tr|G1U101|G1U101_RABIT	HECTD4	Uncharacterized protein OS=Oryctolagus cuniculus (Rabbit) GN=HECTD4 PE=4 SV=2		Typical	6	8	8	8	Typical	7	8	8	8	Typical	7	8	8	8	Typical	4	5	5	5	Typical	2	4	4	4	Typical	1	2	2	2	Typical	2	2	2	2	Typical	1	1	1	1	Typical	1	1	1	1
tr|G1T3L2|G1T3L2_RABIT	EIF3K	Eukaryotic translation initiation factor 3 subunit K OS=Oryctolagus cuniculus (Rabbit) GN=EIF3K PE=1 SV=1		Typical	1	2	2	2	Typical	1	3	3	3	Typical	2	4	4	4		0	0	0	0		0	0	0	0	Typical	1	2	2	2		0	0	0	0		0	0	0	0		0	0	0	0
tr|G1SK12|G1SK12_RABIT	PTPN6	Uncharacterized protein OS=Oryctolagus cuniculus (Rabbit) GN=PTPN6 PE=4 SV=1		Typical	4	7	7	7	Typical	2	3	3	3	Typical	5	6	6	6	Typical	2	3	3	3	Typical	2	2	2	2	Typical	1	2	2	2	Typical	1	2	2	2		0	0	0	0		0	0	0	0
tr|G1T6C0|G1T6C0_RABIT	RAB5B	Uncharacterized protein OS=Oryctolagus cuniculus (Rabbit) GN=RAB5B PE=3 SV=1		Subset	2	2	0	0.0769231	Sameset	2	4	0	0.153846	Typical	1	1	1	1		0	0	0	0	Subset	1	2	0	0.0769231		0	0	0	0		0	0	0	0		0	0	0	0		0	0	0	0
tr|G1TUC2|G1TUC2_RABIT	CNBP	Uncharacterized protein OS=Oryctolagus cuniculus (Rabbit) GN=CNBP PE=4 SV=1		Typical	1	1	1	1	Typical	1	1	1	1	Typical	3	4	4	4		0	0	0	0	Typical	1	1	1	1	Typical	1	1	1	1		0	0	0	0		0	0	0	0		0	0	0	0
tr|G1TCT3|G1TCT3_RABIT	CAD	Uncharacterized protein OS=Oryctolagus cuniculus (Rabbit) GN=CAD PE=3 SV=2		Typical	3	4	4	4	Typical	2	3	3	3	Typical	4	6	6	6	Typical	2	3	3	3	Typical	2	2	2	2	Typical	2	2	2	2	Typical	1	1	1	1		0	0	0	0	Typical	1	1	1	1
tr|G1SQT2|G1SQT2_RABIT	EDC4	Uncharacterized protein OS=Oryctolagus cuniculus (Rabbit) GN=EDC4 PE=4 SV=2		Typical	2	3	3	3	Typical	3	3	3	3	Typical	3	4	4	4	Typical	1	1	1	1	Typical	2	2	2	2	Typical	1	1	1	1		0	0	0	0	Typical	1	1	1	1		0	0	0	0
tr|G1TAL8|G1TAL8_RABIT		Uncharacterized protein OS=Oryctolagus cuniculus (Rabbit) PE=4 SV=2		Typical	3	3	3	3	Typical	2	4	4	4	Typical	2	2	2	2	Typical	1	1	1	1		0	0	0	0		0	0	0	0		0	0	0	0		0	0	0	0		0	0	0	0
tr|G1SEN3|G1SEN3_RABIT	PLEKHF2	Uncharacterized protein OS=Oryctolagus cuniculus (Rabbit) GN=PLEKHF2 PE=4 SV=1			0	0	0	0	Typical	1	2	2	2	Typical	2	4	4	4	Typical	1	1	1	1		0	0	0	0		0	0	0	0		0	0	0	0		0	0	0	0		0	0	0	0
tr|G1ST95|G1ST95_RABIT	EIF3H	Eukaryotic translation initiation factor 3 subunit H OS=Oryctolagus cuniculus (Rabbit) GN=EIF3H PE=1 SV=2		Typical	12	40	40	40	Typical	8	29	29	29	Typical	9	32	32	32	Typical	7	20	20	20	Typical	9	29	29	29	Typical	8	20	20	20	Typical	8	21	21	21	Typical	6	14	14	14	Typical	5	10	10	10
tr|G1SG72|G1SG72_RABIT	ABCE1	Uncharacterized protein OS=Oryctolagus cuniculus (Rabbit) GN=ABCE1 PE=1 SV=1		Typical	15	29	29	29	Typical	13	24	24	24	Typical	12	19	19	19	Typical	9	15	15	15	Typical	10	21	21	21	Typical	6	11	11	11	Typical	11	15	15	15	Typical	5	8	8	8	Typical	7	8	8	8
tr|G1TR97|G1TR97_RABIT	EIF4G3	Uncharacterized protein OS=Oryctolagus cuniculus (Rabbit) GN=EIF4G3 PE=4 SV=2		Typical	7	17	2	2.20619	Typical	6	11	1	1.13746	Typical	6	11	1	1.13746	Typical	6	9	2	2.09622	Typical	6	9	1	1.10997	Typical	6	9	1	1.10997	Subset	4	10	0	0.137457	Subset	3	5	0	0.0687285	Subset	1	1	0	0.0137457
tr|G1SCV4|G1SCV4_RABIT	DNAJA4	Uncharacterized protein OS=Oryctolagus cuniculus (Rabbit) GN=DNAJA4 PE=4 SV=1		Typical	6	6	6	6	Typical	4	4	4	4	Typical	6	7	7	7	Typical	2	2	2	2	Typical	2	2	2	2	Typical	1	1	1	1	Typical	2	3	3	3		0	0	0	0		0	0	0	0
tr|G1SCP7|G1SCP7_RABIT	IQGAP1	Uncharacterized protein OS=Oryctolagus cuniculus (Rabbit) GN=IQGAP1 PE=4 SV=1		Typical	14	24	24	24	Typical	14	19	19	19	Typical	11	17	17	17	Typical	9	12	12	12	Typical	5	7	7	7	Typical	5	10	10	10	Typical	7	8	8	8	Typical	7	9	9	9	Typical	7	8	8	8
tr|G1SKT4|G1SKT4_RABIT	ATP5F1A	ATP synthase subunit alpha OS=Oryctolagus cuniculus (Rabbit) GN=ATP5A1 PE=3 SV=1		Typical	3	5	5	5	Typical	1	1	1	1		0	0	0	0		0	0	0	0		0	0	0	0		0	0	0	0		0	0	0	0		0	0	0	0		0	0	0	0
tr|G1SCY3|G1SCY3_RABIT	UBR4	Uncharacterized protein OS=Oryctolagus cuniculus (Rabbit) GN=UBR4 PE=4 SV=1		Typical	3	3	3	3	Typical	3	3	3	3		0	0	0	0		0	0	0	0		0	0	0	0		0	0	0	0		0	0	0	0		0	0	0	0		0	0	0	0
tr|G1SGA9|G1SGA9_RABIT	XRN1	Uncharacterized protein OS=Oryctolagus cuniculus (Rabbit) GN=XRN1 PE=4 SV=2		Typical	6	9	9	9	Typical	6	7	7	7	Typical	5	5	5	5	Typical	1	1	1	1	Typical	4	4	4	4	Typical	1	1	1	1	Typical	3	4	4	4		0	0	0	0	Typical	2	2	2	2
tr|G1SEI4|G1SEI4_RABIT	NMI	Uncharacterized protein OS=Oryctolagus cuniculus (Rabbit) GN=NMI PE=4 SV=2		Typical	1	1	1	1	Typical	2	3	3	3	Typical	3	5	5	5		0	0	0	0		0	0	0	0		0	0	0	0	Typical	2	2	2	2	Typical	2	2	2	2	Typical	1	1	1	1
tr|G1TIW6|G1TIW6_RABIT		Uncharacterized protein OS=Oryctolagus cuniculus (Rabbit) GN=LOC100345202 PE=3 SV=2			0	0	0	0	Sameset	1	1	0	0.5		0	0	0	0	Sameset	1	1	0	0.5	Sameset	2	2	1	1.5		0	0	0	0	Sameset	2	2	1	1.5	Subset	2	2	0	1	Typical	3	5	1	3
tr|G1T7R2|G1T7R2_RABIT	YWHAE	Uncharacterized protein OS=Oryctolagus cuniculus (Rabbit) GN=YWHAE PE=3 SV=1		Typical	9	13	12	12.4228	Typical	8	18	16	16.8456	Typical	7	18	16	16.8456	Typical	7	23	21	21.8456	Typical	6	24	21	22.2685	Typical	8	23	21	21.8456	Typical	11	35	32	33.2685	Typical	9	29	26	27.2685	Typical	9	27	24	25.2685
tr|G1SZI1|G1SZI1_RABIT	BNIP3L	Uncharacterized protein OS=Oryctolagus cuniculus (Rabbit) GN=BNIP3L PE=4 SV=1			0	0	0	0		0	0	0	0		0	0	0	0	Typical	1	2	2	2		0	0	0	0		0	0	0	0	Typical	1	3	3	3	Typical	1	1	1	1	Typical	1	2	2	2
tr|G1T4R6|G1T4R6_RABIT	KRT16	Uncharacterized protein OS=Oryctolagus cuniculus (Rabbit) GN=KRT16 PE=3 SV=2		Subset	2	4	0	0.097479	Subset	2	3	0	0.0739496	Subset	2	4	0	0.097479	Typical	12	37	6	11.8192	Subset	2	7	0	0.171429	Subset	1	2	0	0.0504202	Typical	3	8	0	0.667958	Subset	2	5	0	0.122689	Typical	5	14	0	0.709943
tr|G1T4S1|G1T4S1_RABIT	KRT13	Uncharacterized protein OS=Oryctolagus cuniculus (Rabbit) GN=KRT13 PE=3 SV=2		Subset	3	6	0	0	Subset	3	5	0	0	Subset	3	6	0	0	Typical	10	31	0	0	Subset	4	11	0	0	Subset	2	4	0	0	Subset	4	9	0	0	Subset	4	8	0	0	Subset	7	20	0	0
tr|G1T3Z5|G1T3Z5_RABIT	CDV3	Uncharacterized protein OS=Oryctolagus cuniculus (Rabbit) GN=CDV3 PE=4 SV=2			0	0	0	0		0	0	0	0		0	0	0	0	Typical	1	3	3	3		0	0	0	0	Typical	1	2	2	2	Typical	1	2	2	2	Typical	1	2	2	2	Typical	1	1	1	1
tr|U3KMP9|U3KMP9_RABIT	EIF4A (Interpro)	Uncharacterized protein OS=Oryctolagus cuniculus (Rabbit) GN=LOC100341294 PE=3 SV=1		Subset	5	38	0	0.457417	Typical	8	37	1	1.4321	Typical	7	42	1	1.50129	Subset	6	39	0	0.470075	Typical	9	45	1	1.52452	Subset	5	56	0	0.682315	Typical	9	57	2	2.64606	Typical	10	65	2	2.74438	Typical	9	52	1	1.60723
tr|G1T8K2|G1T8K2_RABIT	PACSIN2	Uncharacterized protein OS=Oryctolagus cuniculus (Rabbit) GN=PACSIN2 PE=4 SV=1		Typical	5	20	20	20	Typical	5	18	18	18	Typical	5	21	21	21	Typical	5	24	24	24	Typical	5	30	30	30	Typical	4	23	23	23	Typical	4	34	34	34	Typical	5	35	35	35	Typical	5	28	28	28
tr|G1TDI0|G1TDI0_RABIT	PA2G4	Uncharacterized protein OS=Oryctolagus cuniculus (Rabbit) GN=PA2G4 PE=4 SV=1		Typical	29	95	95	95	Typical	23	99	99	99	Typical	24	90	90	90	Typical	26	119	119	119	Typical	29	149	149	149	Typical	29	149	149	149	Typical	24	119	119	119	Typical	23	117	117	117	Typical	23	115	115	115
tr|G1SH66|G1SH66_RABIT	RBM3	Uncharacterized protein OS=Oryctolagus cuniculus (Rabbit) GN=RBM3 PE=4 SV=1		Typical	2	15	15	15	Typical	2	19	19	19	Typical	2	19	19	19	Typical	1	20	20	20	Typical	1	23	23	23	Typical	2	19	19	19	Typical	3	26	26	26	Typical	2	30	30	30	Typical	1	22	22	22
tr|G1SJ37|G1SJ37_RABIT	GAPVD1	Uncharacterized protein OS=Oryctolagus cuniculus (Rabbit) GN=GAPVD1 PE=4 SV=2		Typical	13	24	24	24	Typical	11	25	25	25	Typical	14	29	29	29	Typical	8	20	20	20	Typical	9	20	20	20	Typical	7	16	16	16	Typical	8	15	15	15	Typical	6	13	13	13	Typical	6	13	13	13
sp|P53787|EF1D_RABIT	EEF1D	Elongation factor 1-delta OS=Oryctolagus cuniculus (Rabbit) GN=EEF1D PE=2 SV=1		Typical	8	37	37	37	Typical	8	39	39	39	Typical	8	35	35	35	Typical	8	43	43	43	Typical	9	45	44	44.6661	Typical	8	42	42	42	Typical	11	51	50	50.6661	Typical	10	53	50	51.9983	Typical	9	44	43	43.6661
tr|G1SQH0|G1SQH0_RABIT	RPL26	Uncharacterized protein OS=Oryctolagus cuniculus (Rabbit) GN=RPL26 PE=1 SV=1		Typical	10	50	25	47.5871	Typical	10	60	30	57.1046	Typical	11	59	29	56.1046	Typical	12	67	36	64.008	Typical	12	96	51	91.6568	Typical	11	86	46	82.1394	Typical	11	70	38	66.9115	Typical	10	74	40	70.7185	Typical	11	71	42	68.2011
tr|G1SZ03|G1SZ03_RABIT	EIF3B	Eukaryotic translation initiation factor 3 subunit B OS=Oryctolagus cuniculus (Rabbit) GN=EIF3B PE=1 SV=1		Typical	21	52	52	52	Typical	17	40	40	40	Typical	20	49	49	49	Typical	15	34	34	34	Typical	15	45	45	45	Typical	8	21	21	21	Typical	13	29	29	29	Typical	13	31	31	31	Typical	13	26	26	26
tr|G1TEW4|G1TEW4_RABIT	USP9X	Uncharacterized protein OS=Oryctolagus cuniculus (Rabbit) GN=USP9X PE=4 SV=1		Typical	14	16	16	16	Typical	13	18	18	18	Typical	10	15	15	15	Typical	8	9	9	9	Typical	8	12	12	12	Typical	3	5	5	5	Typical	6	9	9	9	Typical	4	7	7	7	Typical	6	6	6	6
sp|Q8MI17|AL1A1_RABIT	ALDH1A1	Retinal dehydrogenase 1 OS=Oryctolagus cuniculus (Rabbit) GN=ALDH1A1 PE=2 SV=1			0	0	0	0	Typical	1	1	1	1		0	0	0	0		0	0	0	0		0	0	0	0		0	0	0	0	Typical	1	1	1	1	Typical	2	2	2	2	Typical	4	5	5	5
tr|G1SYJ4|G1SYJ4_RABIT	ENO1	Uncharacterized protein OS=Oryctolagus cuniculus (Rabbit) GN=ENO1 PE=3 SV=1			0	0	0	0	Typical	1	1	1	1		0	0	0	0		0	0	0	0		0	0	0	0		0	0	0	0	Typical	2	2	2	2	Typical	1	1	1	1	Typical	5	5	5	5
tr|G1SVJ5|G1SVJ5_RABIT	SARS	Serine--tRNA ligase, cytoplasmic OS=Oryctolagus cuniculus (Rabbit) GN=SARS PE=3 SV=1			0	0	0	0	Typical	1	1	1	1		0	0	0	0		0	0	0	0		0	0	0	0		0	0	0	0	Typical	1	1	1	1	Typical	1	2	2	2	Typical	5	5	5	5
tr|B8K1B2|B8K1B2_RABIT	SYNJ1	Synaptojanin 1 isoform a (Predicted) OS=Oryctolagus cuniculus (Rabbit) GN=SYNJ1 PE=4 SV=1		Typical	4	4	4	4	Typical	4	4	4	4	Typical	4	4	4	4		0	0	0	0	Typical	1	1	1	1	Typical	2	2	2	2	Typical	2	2	2	2		0	0	0	0		0	0	0	0
tr|G1TI39|G1TI39_RABIT	RDX	Uncharacterized protein OS=Oryctolagus cuniculus (Rabbit) GN=RDX PE=4 SV=2		Typical	32	104	78	88.9689	Typical	24	71	54	61.1642	Typical	25	76	55	63.8641	Typical	27	85	65	73.4271	Typical	25	67	49	56.5772	Typical	20	74	54	62.4191	Typical	21	60	38	47.261	Typical	20	49	29	37.4191	Typical	21	49	28	36.8481
tr|G1SQ02|G1SQ02_RABIT	PRDX1	Uncharacterized protein OS=Oryctolagus cuniculus (Rabbit) GN=PRDX1 PE=4 SV=1		Sameset	4	6	5	5.71831	Sameset	3	5	4	4.71831	Sameset	2	6	5	5.71831	Sameset	2	5	3	4.43662	Sameset	4	7	5	6.43662	Sameset	1	3	3	3	Sameset	4	9	8	8.71831	Sameset	5	10	7	9.15493	Typical	6	14	11	13.1549
tr|B8K135|B8K135_RABIT	HBZ_2			Subset	1	3	0	0	Subset	1	5	0	0	Subset	1	4	0	0	Subset	1	6	0	0	Subset	1	6	0	0	Subset	1	6	0	0	Typical	2	7	0	0	Typical	2	10	0	0	Typical	2	9	0	0
tr|G1T3D9|G1T3D9_RABIT	RPS8	40S ribosomal protein S8 OS=Oryctolagus cuniculus (Rabbit) PE=3 SV=1		Typical	20	91	91	91	Typical	18	87	87	87	Typical	18	92	92	92	Typical	16	92	92	92	Typical	16	115	115	115	Typical	20	126	126	126	Typical	12	64	64	64	Typical	12	65	65	65	Typical	11	61	61	61
tr|G1U9T4|G1U9T4_RABIT	NME2	Nucleoside diphosphate kinase OS=Oryctolagus cuniculus (Rabbit) GN=NME2 PE=3 SV=1			0	0	0	0	Typical	2	2	2	2		0	0	0	0		0	0	0	0		0	0	0	0		0	0	0	0	Sameset	1	3	3	3	Typical	2	2	2	2	Typical	2	5	5	5
tr|B8K130|B8K130_RABIT	RA_m008_jsm295ECf	Hemoglobin subunit zeta (Predicted) OS=Oryctolagus cuniculus (Rabbit) GN=RA_m008_jsm295ECf PE=3 SV=1			0	0	0	0	Typical	1	2	2	2		0	0	0	0		0	0	0	0		0	0	0	0		0	0	0	0	Typical	2	2	1	2	Typical	2	4	2	4	Typical	2	4	1	4
tr|G1SKJ9|G1SKJ9_RABIT	RNaseII (InterPro)	Uncharacterized protein OS=Oryctolagus cuniculus (Rabbit) PE=4 SV=2		Typical	3	7	7	7	Typical	3	6	6	6	Typical	5	9	9	9	Typical	4	7	7	7	Typical	3	6	6	6	Typical	3	7	7	7	Typical	2	3	3	3	Typical	1	2	2	2	Typical	1	2	2	2
tr|G1T3X6|G1T3X6_RABIT	TRIM58	Uncharacterized protein OS=Oryctolagus cuniculus (Rabbit) GN=TRIM58 PE=4 SV=2			0	0	0	0	Typical	2	2	2	2	Typical	3	3	3	3	Typical	4	5	5	5		0	0	0	0	Typical	1	1	1	1		0	0	0	0		0	0	0	0		0	0	0	0
tr|G1TT67|G1TT67_RABIT	LOC100357801	Uncharacterized protein OS=Oryctolagus cuniculus (Rabbit) GN=LOC100357801 PE=4 SV=2		Typical	3	3	3	3	Typical	8	8	8	8	Typical	7	7	7	7	Typical	6	7	7	7	Typical	6	8	8	8	Typical	2	2	2	2	Typical	1	1	1	1	Typical	1	1	1	1	Typical	3	3	3	3
tr|G1U0I7|G1U0I7_RABIT	ATXN2L	Uncharacterized protein OS=Oryctolagus cuniculus (Rabbit) GN=ATXN2L PE=4 SV=2		Typical	1	2	2	2	Typical	2	2	2	2	Typical	1	1	1	1	Typical	2	2	2	2	Typical	1	1	1	1		0	0	0	0		0	0	0	0		0	0	0	0		0	0	0	0
tr|G1T373|G1T373_RABIT	PRPS1	Uncharacterized protein OS=Oryctolagus cuniculus (Rabbit) GN=PRPS1 PE=3 SV=1		Typical	2	2	2	2	Typical	2	2	2	2	Typical	1	1	1	1	Typical	2	2	2	2		0	0	0	0		0	0	0	0		0	0	0	0		0	0	0	0		0	0	0	0
tr|G1SQA8|G1SQA8_RABIT	ATP5F1B	ATP synthase subunit beta OS=Oryctolagus cuniculus (Rabbit) GN=ATP5B PE=3 SV=2		Typical	3	4	4	4	Typical	1	1	1	1		0	0	0	0		0	0	0	0	Typical	1	1	1	1	Typical	1	1	1	1		0	0	0	0		0	0	0	0		0	0	0	0
tr|G1SPW5|G1SPW5_RABIT	NFIA	Nuclear factor 1 OS=Oryctolagus cuniculus (Rabbit) GN=NFIA PE=3 SV=2		Typical	1	2	2	2	Typical	1	1	1	1	Typical	1	2	2	2	Typical	1	1	1	1	Typical	1	1	1	1		0	0	0	0		0	0	0	0		0	0	0	0		0	0	0	0
tr|G1U826|G1U826_RABIT	ATP6V1G1	Uncharacterized protein OS=Oryctolagus cuniculus (Rabbit) GN=ATP6V1G1 PE=4 SV=1		Sameset	1	1	1	1	Typical	2	2	2	2	Sameset	1	2	2	2		0	0	0	0		0	0	0	0	Sameset	1	2	2	2		0	0	0	0		0	0	0	0		0	0	0	0
tr|G1TDN6|G1TDN6_RABIT	KRT5	Uncharacterized protein OS=Oryctolagus cuniculus (Rabbit) GN=KRT5 PE=3 SV=1		Typical	5	6	1	3.45767	Subset	1	1	0	0.155496	Typical	3	3	1	1.4278	Typical	22	68	45	52.8623	Typical	4	4	2	2.4278	Subset	1	1	0	0.155496	Typical	6	6	3	3.7001	Typical	3	3	1	1.4278	Typical	9	19	5	8.34541
tr|G1SYN9|G1SYN9_RABIT	HDAC6	Uncharacterized protein OS=Oryctolagus cuniculus (Rabbit) GN=HDAC6 PE=4 SV=2		Typical	1	1	1	1	Typical	1	2	2	2	Typical	2	2	2	2		0	0	0	0		0	0	0	0	Typical	1	1	1	1		0	0	0	0		0	0	0	0		0	0	0	0
tr|G1SIX5|G1SIX5_RABIT	EXOSC9	Uncharacterized protein OS=Oryctolagus cuniculus (Rabbit) GN=EXOSC9 PE=4 SV=1		Typical	1	1	1	1	Typical	2	2	2	2	Typical	2	2	2	2		0	0	0	0		0	0	0	0	Typical	1	1	1	1		0	0	0	0		0	0	0	0		0	0	0	0
tr|G1SVE6|G1SVE6_RABIT	LSM12	Uncharacterized protein OS=Oryctolagus cuniculus (Rabbit) GN=LSM12 PE=4 SV=1		Typical	3	5	5	5	Typical	2	2	2	2	Typical	2	2	2	2		0	0	0	0	Typical	1	1	1	1	Typical	2	2	2	2		0	0	0	0	Typical	1	1	1	1		0	0	0	0
tr|G1SHA6|G1SHA6_RABIT	TRIP4	Uncharacterized protein OS=Oryctolagus cuniculus (Rabbit) GN=TRIP4 PE=4 SV=1		Typical	2	2	2	2	Typical	1	1	1	1	Typical	2	2	2	2		0	0	0	0		0	0	0	0		0	0	0	0		0	0	0	0		0	0	0	0		0	0	0	0
sp|P01376|DEF3_RABIT		Corticostatin-3 OS=Oryctolagus cuniculus (Rabbit) PE=1 SV=2			0	0	0	0	Typical	2	3	2	2.36364	Typical	1	2	2	2		0	0	0	0		0	0	0	0		0	0	0	0		0	0	0	0		0	0	0	0		0	0	0	0
tr|G1TN62|G1TN62_RABIT	RPS19 (InterPro)	Uncharacterized protein OS=Oryctolagus cuniculus (Rabbit) GN=LOC100345774 PE=1 SV=1		Typical	10	88	68	87.154	Typical	10	97	72	95.9425	Typical	10	86	62	84.9848	Typical	12	117	81	115.477	Typical	11	109	71	107.393	Typical	12	111	76	109.519	Typical	10	69	49	68.154	Typical	11	65	45	64.154	Typical	9	59	42	58.2809
tr|G1SCN8|G1SCN8_RABIT	CCT3	T-complex protein 1 subunit gamma OS=Oryctolagus cuniculus (Rabbit) GN=CCT3 PE=3 SV=2		Typical	7	12	7	11.75	Typical	16	28	16	27.4	Typical	13	24	15	23.55	Typical	7	14	11	13.85	Typical	7	10	7	9.85	Typical	6	6	4	5.9	Typical	14	24	13	23.45	Typical	18	44	25	43.05	Typical	16	30	16	29.3
tr|G1SKZ8|G1SKZ8_RABIT	RPL10A	Ribosomal protein OS=Oryctolagus cuniculus (Rabbit) GN=RPL10A PE=3 SV=2		Typical	8	68	68	68	Typical	9	68	68	68	Typical	10	71	71	71	Typical	11	92	92	92	Typical	12	106	106	106	Typical	11	116	116	116	Typical	10	81	81	81	Typical	10	82	82	82	Typical	9	75	75	75
tr|G1SLE6|G1SLE6_RABIT	METAP1	Methionine aminopeptidase OS=Oryctolagus cuniculus (Rabbit) GN=METAP1 PE=3 SV=1		Typical	8	14	14	14	Typical	7	14	14	14	Typical	6	10	10	10	Typical	7	12	12	12	Typical	6	13	13	13	Typical	4	7	7	7	Typical	6	8	8	8	Typical	4	6	6	6	Typical	3	3	3	3
tr|G1SL26|G1SL26_RABIT	MITD1	Uncharacterized protein OS=Oryctolagus cuniculus (Rabbit) GN=MITD1 PE=4 SV=1			0	0	0	0		0	0	0	0		0	0	0	0		0	0	0	0		0	0	0	0		0	0	0	0		0	0	0	0	Typical	2	4	4	4		0	0	0	0
tr|G1U0X0|G1U0X0_RABIT	DTX3L	Uncharacterized protein OS=Oryctolagus cuniculus (Rabbit) GN=DTX3L PE=4 SV=2		Typical	11	26	26	26	Typical	12	20	20	20	Typical	12	24	24	24	Typical	11	22	22	22	Typical	10	23	23	23	Typical	11	15	15	15	Typical	8	21	21	21	Typical	4	10	10	10	Typical	5	7	7	7
tr|G1TDB6|G1TDB6_RABIT	GBP1	Uncharacterized protein OS=Oryctolagus cuniculus (Rabbit) GN=LOC100358539 PE=4 SV=2			0	0	0	0		0	0	0	0		0	0	0	0		0	0	0	0		0	0	0	0	Typical	1	1	1	1		0	0	0	0	Typical	1	1	1	1	Typical	3	3	3	3
tr|U3KN58|U3KN58_RABIT	ZC3HAV1	Poly [ADP-ribose] polymerase OS=Oryctolagus cuniculus (Rabbit) GN=ZC3HAV1 PE=4 SV=1		Sameset	6	8	8	8	Typical	8	11	11	11	Typical	9	14	14	14	Typical	8	13	13	13	Sameset	4	5	5	5	Typical	3	4	4	4	Sameset	3	6	6	6	Sameset	4	6	6	6	Sameset	2	2	2	2
sp|P07952|PMGE_RABIT	BPGM	Bisphosphoglycerate mutase OS=Oryctolagus cuniculus (Rabbit) GN=BPGM PE=2 SV=2			0	0	0	0		0	0	0	0		0	0	0	0	Typical	2	2	2	2	Typical	1	1	1	1		0	0	0	0	Typical	2	2	2	2	Typical	1	1	1	1	Typical	1	1	1	1
tr|G1SPJ5|G1SPJ5_RABIT	GCN1	Uncharacterized protein OS=Oryctolagus cuniculus (Rabbit) GN=GCN1 PE=4 SV=1		Typical	2	2	2	2	Typical	5	6	6	6	Typical	4	4	4	4	Typical	4	4	4	4	Typical	4	4	4	4	Typical	3	3	3	3	Typical	12	13	13	13	Typical	7	9	9	9	Typical	3	3	3	3
tr|G1SF64|G1SF64_RABIT	CELF1	Uncharacterized protein OS=Oryctolagus cuniculus (Rabbit) GN=CELF1 PE=4 SV=1		Typical	5	9	9	9	Typical	4	9	9	9	Typical	8	16	16	16	Typical	8	19	19	19	Typical	6	17	17	17	Typical	4	6	6	6	Typical	7	18	18	18	Typical	8	23	23	23	Typical	6	12	12	12
sp|P30946|HS90A_RABIT	HSP90AA1 HSPCA	Heat shock protein HSP 90-alpha OS=Oryctolagus cuniculus (Rabbit) GN=HSP90AA1 PE=1 SV=2		Typical	11	21	13	20.4971	Typical	14	23	18	22.4971	Typical	12	20	14	19.4971	Typical	10	17	13	16.6229	Typical	13	28	19	26.9943	Typical	7	18	8	17.2457	Typical	14	23	17	22.3714	Typical	14	31	24	30.3714	Typical	15	33	27	32.4971
tr|G1TB40|G1TB40_RABIT	PCBP2	Uncharacterized protein OS=Oryctolagus cuniculus (Rabbit) GN=LOC100347550 PE=4 SV=1		Typical	7	23	23	23	Typical	7	23	23	23	Typical	7	22	22	22	Typical	7	23	23	23	Typical	6	25	25	25	Typical	3	12	12	12	Typical	9	34	34	34	Typical	8	32	32	32	Typical	7	25	25	25
tr|G1TH09|G1TH09_RABIT	RPL7/8 (InterPro)	Uncharacterized protein OS=Oryctolagus cuniculus (Rabbit) GN=LOC100341006 PE=4 SV=1		Typical	10	34	21	26.7935	Typical	12	46	28	36.0217	Typical	11	39	22	29.5761	Typical	11	61	40	49.3587	Typical	10	62	42	50.913	Typical	11	56	35	44.3587	Typical	8	42	27	33.6848	Typical	9	51	36	42.6848	Typical	10	54	36	44.0217
tr|G1T8A8|G1T8A8_RABIT	RNF10	Uncharacterized protein OS=Oryctolagus cuniculus (Rabbit) GN=RNF10 PE=4 SV=1		Typical	2	3	3	3	Typical	3	4	4	4	Typical	5	6	6	6	Typical	3	5	5	5	Typical	4	9	9	9	Typical	4	7	7	7	Typical	2	2	2	2	Typical	1	1	1	1		0	0	0	0
tr|G1SDF2|G1SDF2_RABIT	PCMT1	Protein-L-isoaspartate O-methyltransferase OS=Oryctolagus cuniculus (Rabbit) GN=PCMT1 PE=3 SV=2		Typical	4	5	5	5	Typical	4	5	5	5	Typical	3	3	3	3		0	0	0	0	Typical	2	3	3	3	Typical	3	4	4	4	Typical	3	6	6	6	Typical	6	10	10	10	Typical	6	10	10	10
tr|G1TLE3|G1TLE3_RABIT	LOC100348124	Phosphoglycerate kinase OS=Oryctolagus cuniculus (Rabbit) PE=3 SV=2		Typical	3	3	3	3	Typical	3	3	3	3	Typical	2	2	2	2	Typical	4	5	5	5	Typical	2	2	2	2		0	0	0	0	Typical	3	5	5	5	Typical	2	5	5	5	Typical	6	9	9	9
tr|G1T846|G1T846_RABIT	DARS	Uncharacterized protein OS=Oryctolagus cuniculus (Rabbit) GN=DARS PE=3 SV=2		Typical	2	2	2	2	Typical	3	4	4	4	Typical	1	2	2	2	Typical	3	4	4	4	Typical	2	3	3	3	Typical	1	1	1	1	Typical	6	9	9	9	Typical	4	7	7	7	Typical	1	3	3	3
tr|G1U6F4|G1U6F4_RABIT	PURB	Uncharacterized protein OS=Oryctolagus cuniculus (Rabbit) GN=PURB PE=4 SV=1		Typical	7	18	9	11.7	Typical	5	8	6	6.6	Typical	9	13	11	11.6	Typical	7	11	9	9.6	Typical	4	7	7	7	Typical	5	10	7	7.9	Typical	4	7	7	7	Typical	4	5	5	5	Typical	5	6	5	5.3
tr|G1TN86|G1TN86_RABIT	CUTA	Uncharacterized protein OS=Oryctolagus cuniculus (Rabbit) GN=CUTA PE=4 SV=1		Typical	2	4	4	4	Typical	1	4	4	4	Typical	2	5	5	5	Typical	1	2	2	2	Typical	1	2	2	2		0	0	0	0	Typical	1	2	2	2	Typical	1	1	1	1		0	0	0	0
tr|G1SW00|G1SW00_RABIT	GLUL	Glutamine synthetase OS=Oryctolagus cuniculus (Rabbit) GN=GLUL PE=3 SV=2		Typical	2	3	3	3	Typical	5	6	6	6	Typical	3	5	5	5	Typical	3	6	6	6	Typical	4	6	6	6	Typical	3	4	4	4	Typical	4	7	7	7	Typical	3	4	4	4	Typical	7	17	17	17
sp|P47859|PFKAP_RABIT	PFKP	ATP-dependent 6-phosphofructokinase, platelet type OS=Oryctolagus cuniculus (Rabbit) GN=PFKP PE=1 SV=1			0	0	0	0	Typical	1	1	1	1	Typical	1	1	1	1		0	0	0	0		0	0	0	0		0	0	0	0	Typical	1	2	2	2	Typical	2	3	2	2.3913	Typical	2	4	3	3.3913
tr|G1SUN6|G1SUN6_RABIT	NCAPD2	Condensin complex subunit 1 OS=Oryctolagus cuniculus (Rabbit) GN=NCAPD2 PE=3 SV=2		Typical	6	6	6	6	Typical	17	22	22	22	Typical	13	22	22	22	Typical	14	26	26	26	Typical	8	13	13	13	Typical	3	7	7	7	Typical	13	20	20	20	Typical	17	31	31	31	Typical	17	27	27	27
tr|G1T9F3|G1T9F3_RABIT	KPNB1	Uncharacterized protein OS=Oryctolagus cuniculus (Rabbit) GN=KPNB1 PE=4 SV=2		Typical	1	1	1	1	Typical	1	1	1	1		0	0	0	0	Typical	1	1	1	1	Typical	2	2	2	2	Typical	1	1	1	1	Typical	3	3	3	3	Typical	3	3	3	3	Typical	3	3	3	3
tr|G1U8H8|G1U8H8_RABIT		Uncharacterized protein OS=Oryctolagus cuniculus (Rabbit) GN=RNF213 PE=4 SV=2		Typical	2	2	2	2	Typical	3	3	3	3	Typical	3	3	3	3		0	0	0	0	Typical	2	2	2	2		0	0	0	0		0	0	0	0	Typical	1	1	1	1		0	0	0	0
sp|P12530|LOX15_RABIT	ALOX15	Arachidonate 15-lipoxygenase OS=Oryctolagus cuniculus (Rabbit) GN=ALOX15 PE=1 SV=3		Typical	20	42	42	42	Typical	24	77	77	77	Typical	22	51	51	51	Typical	19	56	56	56	Typical	24	80	80	80	Typical	15	52	52	52	Typical	22	81	81	81	Typical	21	56	56	56	Typical	24	83	83	83
tr|B6V9S9|B6V9S9_RABIT	CCT2	Chaperonin-containing T-complex polypeptide beta subunit OS=Oryctolagus cuniculus (Rabbit) GN=CCT2 PE=2 SV=1		Typical	6	7	7	7	Typical	17	30	30	30	Typical	15	27	27	27	Typical	10	18	18	18	Typical	8	15	15	15	Typical	7	10	10	10	Typical	14	29	29	29	Typical	18	41	41	41	Typical	15	32	32	32
sp|O46638|FKBP3_RABIT	FKBP3 FKBP25	Peptidyl-prolyl cis-trans isomerase FKBP3 OS=Oryctolagus cuniculus (Rabbit) GN=FKBP3 PE=2 SV=2		Typical	2	3	3	3	Typical	2	2	2	2	Typical	2	2	2	2	Typical	3	4	4	4	Typical	1	1	1	1	Typical	2	2	2	2	Typical	6	10	10	10	Typical	4	5	5	5	Typical	2	2	2	2
tr|G1SUH8|G1SUH8_RABIT	KRT2	Uncharacterized protein OS=Oryctolagus cuniculus (Rabbit) GN=KRT2 PE=3 SV=1		Typical	5	9	0	0	Subset	1	1	0	0	Typical	4	4	0	0	Typical	8	43	0	0	Subset	1	1	0	0	Subset	1	1	0	0	Typical	5	6	0	0	Subset	2	5	0	0	Typical	8	28	0	0
tr|G1SP51|G1SP51_RABIT	RPS13	Uncharacterized protein OS=Oryctolagus cuniculus (Rabbit) GN=RPS13 PE=1 SV=1		Typical	10	54	54	54	Typical	9	62	62	62	Typical	9	59	59	59	Typical	9	80	80	80	Typical	9	100	100	100	Typical	9	83	83	83	Typical	9	70	70	70	Typical	9	69	69	69	Typical	9	62	62	62
sp|P01377|DEF4_RABIT		Corticostatin-4 OS=Oryctolagus cuniculus (Rabbit) PE=1 SV=2		Typical	2	2	2	2	Typical	2	2	1	1.63636		0	0	0	0		0	0	0	0	Typical	2	4	4	4		0	0	0	0		0	0	0	0		0	0	0	0		0	0	0	0
tr|G1TCH6|G1TCH6_RABIT	REPS1	Uncharacterized protein OS=Oryctolagus cuniculus (Rabbit) GN=REPS1 PE=4 SV=2			0	0	0	0	Typical	2	2	2	2	Typical	2	2	2	2	Typical	1	1	1	1	Typical	1	1	1	1	Typical	1	2	2	2		0	0	0	0		0	0	0	0		0	0	0	0
tr|G1SLY0|G1SLY0_RABIT	SLC4A1	Anion exchange protein OS=Oryctolagus cuniculus (Rabbit) GN=SLC4A1 PE=3 SV=2			0	0	0	0	Typical	1	2	2	2	Typical	1	2	2	2	Typical	1	1	1	1	Typical	1	1	1	1	Typical	1	1	1	1		0	0	0	0		0	0	0	0		0	0	0	0
tr|G1TKC4|G1TKC4_RABIT	KARS	Lysine--tRNA ligase OS=Oryctolagus cuniculus (Rabbit) GN=KARS PE=3 SV=2		Typical	14	25	25	25	Typical	14	27	27	27	Typical	13	26	26	26	Typical	14	31	31	31	Typical	12	24	24	24	Typical	9	22	22	22	Typical	13	36	36	36	Typical	14	31	31	31	Typical	14	33	33	33
tr|G1TBW9|G1TBW9_RABIT	DYNLL2	Uncharacterized protein OS=Oryctolagus cuniculus (Rabbit) GN=DYNLL2 PE=4 SV=1			0	0	0	0		0	0	0	0	Typical	2	4	4	4	Sameset	1	2	2	2		0	0	0	0		0	0	0	0		0	0	0	0		0	0	0	0		0	0	0	0
tr|G1SPM5|G1SPM5_RABIT	ACTR1A	Uncharacterized protein OS=Oryctolagus cuniculus (Rabbit) GN=ACTR1A PE=3 SV=1		Typical	1	1	1	1	Typical	1	2	2	2	Typical	1	1	1	1	Typical	1	1	1	1		0	0	0	0		0	0	0	0		0	0	0	0		0	0	0	0		0	0	0	0
tr|G1SMM5|G1SMM5_RABIT	DNAJA2	Uncharacterized protein OS=Oryctolagus cuniculus (Rabbit) GN=DNAJA2 PE=3 SV=1		Typical	6	12	12	12	Typical	6	10	10	10	Typical	5	8	8	8	Typical	4	7	7	7	Typical	2	3	3	3	Typical	4	7	7	7	Typical	3	5	5	5	Typical	2	4	4	4	Typical	2	4	4	4
tr|Q6EVH7|Q6EVH7_RABIT	eIF4GI	eIF4GI protein OS=Oryctolagus cuniculus (Rabbit) GN=eIF4GI PE=2 SV=1		Typical	1	2	2	2	Subset	1	1	0	0.00347222	Subset	1	1	0	0.00347222		0	0	0	0		0	0	0	0		0	0	0	0		0	0	0	0		0	0	0	0		0	0	0	0
tr|G1SGT0|G1SGT0_RABIT	LANCL2	Uncharacterized protein OS=Oryctolagus cuniculus (Rabbit) GN=LANCL2 PE=4 SV=1		Typical	1	1	1	1	Typical	1	2	2	2	Typical	1	1	1	1		0	0	0	0		0	0	0	0		0	0	0	0		0	0	0	0		0	0	0	0		0	0	0	0
tr|G1SYD3|G1SYD3_RABIT	YARS	Tyrosine--tRNA ligase OS=Oryctolagus cuniculus (Rabbit) GN=YARS PE=3 SV=1			0	0	0	0	Typical	3	4	4	4		0	0	0	0		0	0	0	0		0	0	0	0		0	0	0	0		0	0	0	0		0	0	0	0		0	0	0	0
tr|G1TFI4|G1TFI4_RABIT	BTF3L4	Transcription factor BTF3 OS=Oryctolagus cuniculus (Rabbit) GN=BTF3L4 PE=3 SV=1		Typical	3	6	6	6	Typical	3	5	5	5	Typical	3	7	7	7	Typical	2	6	6	6	Typical	2	7	7	7	Typical	3	9	9	9	Typical	1	2	2	2	Typical	1	2	2	2	Typical	1	2	2	2
tr|G1T6I6|G1T6I6_RABIT	ILF3	Uncharacterized protein OS=Oryctolagus cuniculus (Rabbit) GN=ILF3 PE=4 SV=1		Typical	7	8	8	8	Typical	8	8	8	8	Typical	2	2	2	2	Typical	8	11	11	11	Typical	7	11	11	11	Typical	3	5	5	5	Typical	2	2	2	2	Typical	2	2	2	2	Typical	2	2	2	2
tr|G1SMI6|G1SMI6_RABIT	PRDX4			Typical	2	2	1	1.28169	Typical	2	4	3	3.28169	Typical	2	2	1	1.28169	Typical	2	4	2	2.56338	Typical	3	4	2	2.56338		0	0	0	0	Typical	2	5	4	4.28169	Typical	3	7	4	4.84507	Typical	3	6	3	3.84507
sp|P10160|IF5A1_RABIT	EIF5A	Eukaryotic translation initiation factor 5A-1 OS=Oryctolagus cuniculus (Rabbit) GN=EIF5A PE=1 SV=2		Typical	14	60	26	58.7533	Typical	15	65	29	63.68	Typical	15	78	43	76.7167	Typical	14	71	35	69.68	Typical	14	72	32	70.5333	Typical	13	50	24	49.0467	Typical	13	74	31	72.4233	Typical	12	84	37	82.2767	Typical	13	74	32	72.46
tr|G1TAY6|G1TAY6_RABIT	KRT19	Uncharacterized protein OS=Oryctolagus cuniculus (Rabbit) GN=KRT19 PE=3 SV=1		Subset	2	4	0	0	Subset	2	3	0	0	Subset	2	4	0	0	Subset	5	17	0	0	Subset	2	7	0	0	Subset	1	2	0	0	Sameset	3	8	0	0	Subset	2	5	0	0	Subset	3	9	0	0
sp|P41111|EI2BD_RABIT	EIF2B4	Translation initiation factor eIF-2B subunit delta OS=Oryctolagus cuniculus (Rabbit) GN=EIF2B4 PE=2 SV=2		Typical	10	16	16	16	Typical	11	17	17	17	Typical	9	13	13	13	Typical	6	10	10	10	Typical	9	15	15	15	Typical	7	12	12	12	Typical	6	10	10	10	Typical	5	7	7	7	Typical	5	7	7	7
tr|G1SRL3|G1SRL3_RABIT	NMT1	Glycylpeptide N-tetradecanoyltransferase OS=Oryctolagus cuniculus (Rabbit) GN=NMT1 PE=3 SV=2		Typical	7	9	9	9	Typical	7	13	13	13	Typical	6	12	12	12	Typical	5	9	9	9	Typical	4	8	8	8	Typical	4	7	7	7	Typical	4	6	6	6	Typical	4	7	7	7	Typical	3	3	3	3
tr|B6V9S8|B6V9S8_RABIT	CCT7	Chaperonin-containing T-complex polypeptide eta subunit OS=Oryctolagus cuniculus (Rabbit) PE=2 SV=1		Typical	3	5	5	5	Typical	16	24	24	24	Typical	11	16	16	16	Typical	6	7	7	7	Typical	5	5	5	5	Typical	4	6	6	6	Typical	11	15	15	15	Typical	19	35	35	35	Typical	17	27	27	27
tr|G1T9M9|G1T9M9_RABIT	HSPA8	Uncharacterized protein OS=Oryctolagus cuniculus (Rabbit) GN=HSPA8 PE=3 SV=1		Typical	36	316	225	313.521	Typical	37	306	216	303.821	Typical	37	318	216	315.604	Typical	40	342	230	339.597	Typical	34	338	236	335.865	Typical	35	361	253	358.393	Typical	32	345	244	342.899	Typical	36	337	232	335.072	Typical	36	286	189	284.115
tr|G1SY38|G1SY38_RABIT	NCAPH	Condensin complex subunit 2 OS=Oryctolagus cuniculus (Rabbit) GN=NCAPH PE=3 SV=2		Typical	1	2	2	2	Typical	3	5	5	5	Typical	5	8	8	8	Typical	3	4	4	4	Typical	2	3	3	3	Typical	1	2	2	2	Typical	3	8	8	8	Typical	5	10	10	10	Typical	4	9	9	9
tr|G1SMY7|G1SMY7_RABIT	APEH	Acylamino-acid-releasing enzyme OS=Oryctolagus cuniculus (Rabbit) GN=APEH PE=4 SV=1			0	0	0	0	Typical	3	3	3	3		0	0	0	0		0	0	0	0	Typical	1	1	1	1		0	0	0	0	Typical	2	2	2	2	Typical	2	2	2	2	Typical	3	6	6	6
tr|G1U6B2|G1U6B2_RABIT	ALAD	Delta-aminolevulinic acid dehydratase OS=Oryctolagus cuniculus (Rabbit) GN=ALAD PE=3 SV=2		Typical	2	3	3	3	Typical	4	6	6	6	Typical	3	3	3	3	Typical	2	3	3	3	Typical	3	4	4	4	Typical	3	4	4	4	Typical	4	8	8	8	Typical	3	4	4	4	Typical	5	11	11	11
tr|G1SW24|G1SW24_RABIT	AARS	Uncharacterized protein OS=Oryctolagus cuniculus (Rabbit) GN=AARS PE=3 SV=1			0	0	0	0		0	0	0	0		0	0	0	0		0	0	0	0		0	0	0	0		0	0	0	0		0	0	0	0		0	0	0	0	Typical	2	3	3	3
tr|G1SES9|G1SES9_RABIT	ATIC	Uncharacterized protein OS=Oryctolagus cuniculus (Rabbit) GN=ATIC PE=3 SV=1			0	0	0	0		0	0	0	0		0	0	0	0		0	0	0	0		0	0	0	0		0	0	0	0		0	0	0	0	Typical	1	1	1	1	Typical	2	2	2	2
tr|G1SG83|G1SG83_RABIT	CAP2	Adenylyl cyclase-associated protein OS=Oryctolagus cuniculus (Rabbit) GN=CAP2 PE=3 SV=2			0	0	0	0		0	0	0	0		0	0	0	0		0	0	0	0		0	0	0	0		0	0	0	0	Typical	1	1	1	1	Typical	2	2	2	2		0	0	0	0
tr|G1STW7|G1STW7_RABIT	FARSB	Uncharacterized protein OS=Oryctolagus cuniculus (Rabbit) GN=FARSB PE=4 SV=2			0	0	0	0		0	0	0	0		0	0	0	0		0	0	0	0		0	0	0	0		0	0	0	0		0	0	0	0	Typical	2	2	2	2	Typical	1	1	1	1
sp|P08628|THIO_RABIT	TXN	Thioredoxin OS=Oryctolagus cuniculus (Rabbit) GN=TXN PE=1 SV=2			0	0	0	0		0	0	0	0		0	0	0	0		0	0	0	0		0	0	0	0		0	0	0	0		0	0	0	0	Typical	2	3	3	3		0	0	0	0
tr|G1TBS1|G1TBS1_RABIT	PARK7	Uncharacterized protein OS=Oryctolagus cuniculus (Rabbit) GN=PARK7 PE=4 SV=1			0	0	0	0		0	0	0	0		0	0	0	0		0	0	0	0		0	0	0	0		0	0	0	0	Typical	1	1	1	1		0	0	0	0	Typical	1	2	2	2
tr|G1SPF5|G1SPF5_RABIT	PGAM1	Uncharacterized protein OS=Oryctolagus cuniculus (Rabbit) GN=PGAM1 PE=4 SV=1			0	0	0	0		0	0	0	0		0	0	0	0		0	0	0	0		0	0	0	0		0	0	0	0	Typical	1	1	0	0.333333		0	0	0	0	Typical	2	2	1	1.33333
tr|G1SL80|G1SL80_RABIT	UROD	Uroporphyrinogen decarboxylase OS=Oryctolagus cuniculus (Rabbit) GN=UROD PE=3 SV=1			0	0	0	0		0	0	0	0		0	0	0	0		0	0	0	0		0	0	0	0		0	0	0	0	Typical	1	1	1	1	Typical	1	1	1	1	Typical	1	1	1	1
tr|G1SYD9|G1SYD9_RABIT	CMPK2	Uncharacterized protein OS=Oryctolagus cuniculus (Rabbit) GN=CMPK2 PE=3 SV=1			0	0	0	0		0	0	0	0		0	0	0	0		0	0	0	0		0	0	0	0		0	0	0	0		0	0	0	0	Typical	1	1	1	1	Typical	2	2	2	2
tr|G1U8C4|G1U8C4_RABIT	PSME1				0	0	0	0		0	0	0	0		0	0	0	0		0	0	0	0		0	0	0	0		0	0	0	0		0	0	0	0	Typical	1	1	1	1	Typical	2	2	2	2
tr|G1T143|G1T143_RABIT	TRIM25	Uncharacterized protein OS=Oryctolagus cuniculus (Rabbit) GN=TRIM25 PE=4 SV=1			0	0	0	0		0	0	0	0		0	0	0	0		0	0	0	0		0	0	0	0		0	0	0	0	Typical	1	1	1	1	Typical	1	1	1	1	Typical	1	1	1	1
tr|G1SUA2|G1SUA2_RABIT		Uncharacterized protein OS=Oryctolagus cuniculus (Rabbit) GN=TMA7 PE=4 SV=1			0	0	0	0		0	0	0	0		0	0	0	0		0	0	0	0		0	0	0	0		0	0	0	0	Typical	1	2	2	2		0	0	0	0	Typical	1	1	1	1
tr|G1SS07|G1SS07_RABIT	UBE2V2	Uncharacterized protein OS=Oryctolagus cuniculus (Rabbit) GN=UBE2V2 PE=4 SV=1			0	0	0	0		0	0	0	0		0	0	0	0		0	0	0	0		0	0	0	0		0	0	0	0		0	0	0	0	Typical	1	1	1	1	Typical	1	2	2	2
tr|G1SEM7|G1SEM7_RABIT	THG1L	tRNA(His) guanylyltransferase OS=Oryctolagus cuniculus (Rabbit) GN=THG1L PE=3 SV=1			0	0	0	0	Typical	1	1	1	1		0	0	0	0		0	0	0	0	Typical	1	1	1	1		0	0	0	0	Typical	1	1	1	1	Typical	3	3	3	3	Typical	1	2	2	2
tr|G1SPL5|G1SPL5_RABIT	MIB1	Uncharacterized protein OS=Oryctolagus cuniculus (Rabbit) GN=MIB1 PE=4 SV=1		Typical	2	3	3	3	Typical	2	2	2	2	Typical	2	2	2	2	Typical	1	1	1	1	Typical	2	2	2	2	Typical	2	3	3	3	Typical	1	1	1	1		0	0	0	0		0	0	0	0
tr|G1SXB8|G1SXB8_RABIT	AP1B1	AP complex subunit beta OS=Oryctolagus cuniculus (Rabbit) GN=AP1B1 PE=3 SV=2		Typical	2	2	1	1.0123	Typical	2	3	1	1.02459	Typical	2	2	1	1.0123	Typical	2	3	1	1.02459	Typical	3	3	2	2.0123		0	0	0	0	Subset	1	1	0	0.0122951		0	0	0	0		0	0	0	0
tr|G1U2Z9|G1U2Z9_RABIT	RPS5 (InterPro)	Uncharacterized protein OS=Oryctolagus cuniculus (Rabbit) PE=1 SV=2		Typical	10	50	2	3.00516	Subset	9	51	0	1.05912	Subset	9	44	0	0.911308	Typical	9	38	1	1.76004	Typical	8	40	1	1.80523	Subset	7	64	0	1.35636	Subset	7	34	0	0.699159	Subset	6	34	0	0.699159	Subset	8	31	0	0.634823
tr|G1U9R6|G1U9R6_RABIT	FN1	Fibronectin OS=Oryctolagus cuniculus (Rabbit) GN=FN1 PE=4 SV=1		Typical	3	3	3	3	Typical	2	2	2	2		0	0	0	0	Typical	2	3	3	3	Typical	2	3	3	3	Typical	1	1	1	1	Typical	3	4	4	4	Typical	3	5	5	5	Typical	3	4	4	4
tr|G1STU0|G1STU0_RABIT	WDR77	Uncharacterized protein OS=Oryctolagus cuniculus (Rabbit) GN=WDR77 PE=4 SV=1			0	0	0	0		0	0	0	0		0	0	0	0		0	0	0	0	Typical	1	1	1	1		0	0	0	0	Typical	1	2	2	2	Typical	1	1	1	1		0	0	0	0
tr|G1T3M5|G1T3M5_RABIT	EEF1E1	Uncharacterized protein OS=Oryctolagus cuniculus (Rabbit) GN=EEF1E1 PE=4 SV=1			0	0	0	0		0	0	0	0		0	0	0	0		0	0	0	0	Typical	1	1	1	1		0	0	0	0	Typical	1	1	1	1	Typical	1	1	1	1	Typical	1	1	1	1
tr|G1SNL7|G1SNL7_RABIT	ASCC2	Uncharacterized protein OS=Oryctolagus cuniculus (Rabbit) GN=ASCC2 PE=4 SV=2		Typical	8	10	10	10	Typical	4	5	5	5	Typical	6	9	9	9	Typical	1	4	4	4	Typical	3	6	6	6	Typical	2	5	5	5	Typical	4	5	5	5	Typical	1	2	2	2	Typical	2	3	3	3
tr|G1SHY2|G1SHY2_RABIT	KRT75	Uncharacterized protein OS=Oryctolagus cuniculus (Rabbit) GN=KRT75 PE=3 SV=1		Subset	4	5	0	0.0423737	Subset	1	1	0	0.00268097	Subset	2	2	0	0.0073758	Typical	8	24	1	2.12017	Subset	2	2	0	0.0073758	Subset	1	1	0	0.00268097	Subset	3	3	0	0.0120706	Subset	2	2	0	0.0073758	Subset	5	13	0	0.0549913
tr|G1TCG0|G1TCG0_RABIT	PDCD4	Uncharacterized protein OS=Oryctolagus cuniculus (Rabbit) GN=PDCD4 PE=4 SV=1			0	0	0	0		0	0	0	0		0	0	0	0		0	0	0	0	Typical	1	2	2	2		0	0	0	0		0	0	0	0	Typical	1	1	1	1	Typical	1	2	2	2
tr|G1SYI6|G1SYI6_RABIT	ABI1	Uncharacterized protein OS=Oryctolagus cuniculus (Rabbit) GN=ABI1 PE=4 SV=1			0	0	0	0		0	0	0	0		0	0	0	0		0	0	0	0	Typical	1	1	1	1	Typical	1	2	2	2		0	0	0	0	Typical	1	2	2	2	Typical	1	1	1	1
tr|G1U9I8|G1U9I8_RABIT	KRT1	Uncharacterized protein OS=Oryctolagus cuniculus (Rabbit) GN=KRT1 PE=3 SV=2		Typical	6	16	0	0	Subset	4	8	0	0	Subset	5	10	0	0	Typical	7	53	0	0	Subset	2	9	0	0	Subset	3	8	0	0	Typical	6	17	0	0	Typical	3	8	0	0	Typical	11	43	0	0
tr|G1SKE3|G1SKE3_RABIT	LOC100351904	Uncharacterized protein OS=Oryctolagus cuniculus (Rabbit) GN=LOC100352401 PE=3 SV=1		Subset	3	4	0	0.277849		0	0	0	0	Subset	1	1	0	0.0328638	Typical	9	34	7	13.9114	Subset	1	1	0	0.0328638		0	0	0	0	Subset	2	2	0	0.0657277	Subset	1	1	0	0.0328638	Subset	3	10	0	0.328639
sp|P29694|EF1G_RABIT	EEF1G	Elongation factor 1-gamma OS=Oryctolagus cuniculus (Rabbit) GN=EEF1G PE=2 SV=3		Typical	25	150	150	150	Typical	26	138	138	138	Typical	24	135	135	135	Typical	22	133	133	133	Typical	22	183	183	183	Typical	22	190	190	190	Typical	19	166	166	166	Typical	21	159	159	159	Typical	17	128	128	128
tr|G1TPN3|G1TPN3_RABIT	HNRNPAB	Uncharacterized protein OS=Oryctolagus cuniculus (Rabbit) GN=HNRNPAB PE=4 SV=1		Typical	15	53	47	52.7358	Typical	14	47	43	46.8239	Typical	14	50	48	49.9119	Typical	15	52	49	51.8679	Typical	11	65	58	64.6918	Typical	14	50	45	49.7799	Typical	11	65	62	64.8679	Typical	12	60	57	59.8679	Typical	12	48	47	47.956
tr|G1U636|G1U636_RABIT	CAPRIN1	Uncharacterized protein OS=Oryctolagus cuniculus (Rabbit) GN=CAPRIN1 PE=4 SV=1		Typical	8	11	11	11	Typical	6	13	13	13	Typical	8	12	12	12	Typical	8	18	18	18	Typical	6	10	10	10	Typical	7	18	18	18	Typical	5	9	9	9	Typical	4	6	6	6	Typical	3	3	3	3
tr|G1T5U2|G1T5U2_RABIT	EIF1A (InterPro)	Uncharacterized protein OS=Oryctolagus cuniculus (Rabbit) GN=LOC100345822 PE=3 SV=1		Typical	5	22	0	0	Typical	4	20	0	0	Typical	4	21	0	0	Typical	4	9	0	0	Typical	3	13	0	0	Typical	4	15	0	0	Typical	6	15	0	0	Typical	4	13	0	0	Typical	4	9	0	0
tr|G1TAF8|G1TAF8_RABIT	STIP1	Uncharacterized protein OS=Oryctolagus cuniculus (Rabbit) GN=STIP1 PE=4 SV=2		Typical	4	4	4	4	Typical	5	7	7	7	Typical	5	7	7	7	Typical	5	8	8	8	Typical	6	8	8	8	Typical	4	6	6	6	Typical	6	9	9	9	Typical	7	11	11	11	Typical	9	10	10	10
tr|G1SPK4|G1SPK4_RABIT	RPLP0	60S acidic ribosomal protein P0 OS=Oryctolagus cuniculus (Rabbit) GN=RPLP0 PE=3 SV=2		Typical	10	38	1	13.7444	Typical	11	42	3	16.4333	Typical	12	37	3	14.7111	Typical	13	61	6	24.9444	Typical	12	68	9	29.3222	Typical	12	62	3	23.3222	Typical	11	46	2	17.1556	Typical	12	42	2	15.7778	Typical	13	50	2	18.5333
tr|G1U797|G1U797_RABIT	FXR1	Uncharacterized protein OS=Oryctolagus cuniculus (Rabbit) GN=FXR1 PE=4 SV=2		Typical	13	35	27	30.6967	Typical	14	31	26	28.342	Typical	15	30	26	27.8483	Typical	11	22	20	20.9873	Typical	11	23	19	20.7221	Typical	13	33	26	29.203	Typical	13	29	25	26.7221	Typical	10	20	16	17.7221	Typical	8	12	9	10.2285
tr|G1T9V7|G1T9V7_RABIT	SRP19	Uncharacterized protein OS=Oryctolagus cuniculus (Rabbit) GN=LOC100345569 PE=4 SV=1		Typical	3	5	5	5	Typical	3	5	5	5	Typical	3	5	5	5	Typical	2	4	4	4	Typical	2	2	2	2	Typical	1	2	2	2	Typical	2	2	2	2	Typical	2	2	2	2	Typical	1	1	1	1
tr|G1TG89|G1TG89_RABIT	RPS15A	Uncharacterized protein OS=Oryctolagus cuniculus (Rabbit) GN=RPS15A PE=1 SV=1		Typical	10	42	42	42	Typical	10	37	37	37	Typical	10	42	42	42	Typical	11	44	44	44	Typical	10	46	46	46	Typical	9	57	57	57	Typical	9	31	31	31	Typical	8	25	25	25	Typical	8	25	25	25
tr|G1SZW8|G1SZW8_RABIT	EPS15L1	Uncharacterized protein OS=Oryctolagus cuniculus (Rabbit) GN=EPS15L1 PE=4 SV=1		Typical	6	7	7	7	Typical	6	7	7	7	Typical	5	6	6	6	Typical	3	4	4	4	Typical	5	6	6	6	Typical	4	4	4	4	Typical	3	3	3	3	Typical	3	4	4	4	Typical	1	1	1	1
tr|G1T860|G1T860_RABIT	MYO9B	Uncharacterized protein OS=Oryctolagus cuniculus (Rabbit) GN=MYO9B PE=4 SV=1		Typical	2	3	3	3	Typical	3	5	5	5	Typical	3	3	3	3	Typical	2	3	3	3	Typical	3	3	3	3	Typical	2	2	2	2	Typical	1	1	1	1	Typical	1	1	1	1	Typical	1	1	1	1
tr|G1SWD9|G1SWD9_RABIT	CARS	Uncharacterized protein OS=Oryctolagus cuniculus (Rabbit) GN=CARS PE=4 SV=1		Typical	12	22	22	22	Typical	13	26	26	26	Typical	9	21	21	21	Typical	10	20	20	20	Typical	8	19	19	19	Typical	5	14	14	14	Typical	7	17	17	17	Typical	6	13	13	13	Typical	6	12	12	12
tr|G1T2G4|G1T2G4_RABIT	EIF2S1	Eukaryotic translation initiation factor 2 subunit 1 OS=Oryctolagus cuniculus (Rabbit) GN=EIF2S1 PE=4 SV=1		Typical	13	23	23	23	Typical	11	22	22	22	Typical	10	24	24	24	Typical	7	14	14	14	Typical	8	16	16	16	Typical	6	10	10	10	Typical	7	13	13	13	Typical	7	13	13	13	Typical	7	16	16	16
sp|P67873|CSK2B_RABIT	CSNK2B CK2N	Casein kinase II subunit beta OS=Oryctolagus cuniculus (Rabbit) GN=CSNK2B PE=2 SV=1		Typical	1	1	1	1	Typical	1	1	1	1	Typical	1	1	1	1	Typical	2	3	3	3	Typical	2	2	2	2	Typical	2	2	2	2		0	0	0	0		0	0	0	0		0	0	0	0
sp|P25230|CAP18_RABIT	CAP18	Antimicrobial protein CAP18 OS=Oryctolagus cuniculus (Rabbit) GN=CAP18 PE=1 SV=1		Typical	1	1	1	1	Typical	1	1	1	1	Typical	1	1	1	1	Typical	1	1	1	1	Typical	1	2	2	2	Typical	1	1	1	1		0	0	0	0		0	0	0	0		0	0	0	0
tr|G1SSA2|G1SSA2_RABIT	PSMD2	Uncharacterized protein OS=Oryctolagus cuniculus (Rabbit) GN=PSMD2 PE=4 SV=2			0	0	0	0	Typical	2	2	2	2	Typical	1	1	1	1	Typical	1	1	1	1	Typical	2	2	2	2	Typical	1	1	1	1		0	0	0	0		0	0	0	0		0	0	0	0
tr|G1SFC9|G1SFC9_RABIT	NCAPH2	Uncharacterized protein OS=Oryctolagus cuniculus (Rabbit) GN=NCAPH2 PE=4 SV=1		Typical	1	1	1	1	Typical	1	1	1	1	Typical	1	1	1	1	Typical	1	1	1	1		0	0	0	0	Typical	1	1	1	1		0	0	0	0		0	0	0	0		0	0	0	0
tr|G1T301|G1T301_RABIT	ZNF326	Uncharacterized protein OS=Oryctolagus cuniculus (Rabbit) GN=ZNF326 PE=4 SV=1		Typical	1	1	1	1	Typical	1	1	1	1	Typical	1	1	1	1	Typical	1	1	1	1		0	0	0	0	Typical	1	1	1	1		0	0	0	0		0	0	0	0		0	0	0	0
tr|G1T1Y7|G1T1Y7_RABIT	KRT14	Uncharacterized protein OS=Oryctolagus cuniculus (Rabbit) GN=KRT14 PE=3 SV=2		Subset	3	6	0	0.224141	Subset	3	5	0	0.188846	Subset	3	6	0	0.224141	Typical	13	40	9	17.7422	Subset	3	10	0	0.374026	Subset	2	4	0	0.153552	Subset	3	8	0	0.29725	Subset	3	7	0	0.261956	Typical	5	13	0	1.03486
sp|Q9TT13|VDAC3_RABIT	VDAC3	Voltage-dependent anion-selective channel protein 3 OS=Oryctolagus cuniculus (Rabbit) GN=VDAC3 PE=2 SV=1		Typical	1	1	1	1	Typical	2	2	2	2		0	0	0	0		0	0	0	0		0	0	0	0	Typical	1	1	1	1		0	0	0	0		0	0	0	0		0	0	0	0
tr|G1STR7|G1STR7_RABIT	SPTA1	Uncharacterized protein OS=Oryctolagus cuniculus (Rabbit) GN=SPTA1 PE=4 SV=2		Typical	1	1	1	1		0	0	0	0	Typical	2	2	2	2	Typical	1	1	1	1		0	0	0	0		0	0	0	0		0	0	0	0		0	0	0	0		0	0	0	0
sp|P02602|MYL1_RABIT	MYL1	Myosin light chain 1/3, skeletal muscle isoform OS=Oryctolagus cuniculus (Rabbit) GN=MYL1 PE=1 SV=3			0	0	0	0	Typical	1	1	1	1	Typical	1	2	2	2	Typical	1	1	1	1		0	0	0	0		0	0	0	0		0	0	0	0		0	0	0	0		0	0	0	0
tr|G1SLT8|G1SLT8_RABIT	HNRNPH3	Uncharacterized protein OS=Oryctolagus cuniculus (Rabbit) GN=HNRNPH3 PE=4 SV=1		Typical	2	2	2	2	Typical	1	1	1	1		0	0	0	0		0	0	0	0		0	0	0	0		0	0	0	0		0	0	0	0		0	0	0	0		0	0	0	0
tr|G1SWD3|G1SWD3_RABIT	TFCP2	Uncharacterized protein OS=Oryctolagus cuniculus (Rabbit) GN=TFCP2 PE=4 SV=1		Typical	2	2	2	2	Typical	1	1	1	1		0	0	0	0		0	0	0	0		0	0	0	0		0	0	0	0		0	0	0	0		0	0	0	0		0	0	0	0
tr|G1SW88|G1SW88_RABIT	NFX1	Uncharacterized protein OS=Oryctolagus cuniculus (Rabbit) GN=NFX1 PE=4 SV=2		Typical	2	2	2	2	Typical	1	1	1	1		0	0	0	0		0	0	0	0		0	0	0	0		0	0	0	0		0	0	0	0		0	0	0	0		0	0	0	0
tr|G1SFH0|G1SFH0_RABIT	PDCD2L	Uncharacterized protein OS=Oryctolagus cuniculus (Rabbit) GN=PDCD2L PE=4 SV=1		Typical	1	1	1	1	Typical	1	1	1	1	Typical	1	1	1	1		0	0	0	0		0	0	0	0		0	0	0	0		0	0	0	0		0	0	0	0		0	0	0	0
tr|G1SFE9|G1SFE9_RABIT	AHSA1	Uncharacterized protein OS=Oryctolagus cuniculus (Rabbit) GN=AHSA1 PE=4 SV=1		Typical	1	1	1	1	Typical	2	2	2	2		0	0	0	0		0	0	0	0		0	0	0	0		0	0	0	0		0	0	0	0		0	0	0	0		0	0	0	0
tr|G1SGG2|G1SGG2_RABIT	ARHGEF2	Uncharacterized protein OS=Oryctolagus cuniculus (Rabbit) GN=ARHGEF2 PE=4 SV=1			0	0	0	0	Typical	2	2	2	2	Typical	1	1	1	1		0	0	0	0		0	0	0	0		0	0	0	0		0	0	0	0		0	0	0	0		0	0	0	0
tr|G1T753|G1T753_RABIT	NLE1	Uncharacterized protein OS=Oryctolagus cuniculus (Rabbit) GN=NLE1 PE=4 SV=2			0	0	0	0	Typical	2	2	2	2	Typical	1	1	1	1		0	0	0	0		0	0	0	0		0	0	0	0		0	0	0	0		0	0	0	0		0	0	0	0
tr|G1SI58|G1SI58_RABIT	EPN3	Uncharacterized protein OS=Oryctolagus cuniculus (Rabbit) GN=EPN3 PE=4 SV=1			0	0	0	0	Typical	1	2	2	2	Typical	1	1	1	1		0	0	0	0		0	0	0	0		0	0	0	0		0	0	0	0		0	0	0	0		0	0	0	0
tr|G1SKM5|G1SKM5_RABIT	NPLOC4	Uncharacterized protein OS=Oryctolagus cuniculus (Rabbit) GN=NPLOC4 PE=4 SV=1			0	0	0	0	Typical	2	2	2	2	Typical	1	1	1	1		0	0	0	0		0	0	0	0		0	0	0	0		0	0	0	0		0	0	0	0		0	0	0	0
tr|G1SDN4|G1SDN4_RABIT	SYNCRIP	Uncharacterized protein OS=Oryctolagus cuniculus (Rabbit) GN=SYNCRIP PE=4 SV=1		Typical	20	81	62	80.2589	Typical	21	76	57	75.2589	Typical	23	76	60	75.3759	Typical	22	75	58	74.3369	Typical	19	85	65	84.2199	Typical	16	73	50	72.1028	Typical	22	94	72	93.1418	Typical	21	90	69	89.1809	Typical	21	70	49	69.1809
tr|G1TAH7|G1TAH7_RABIT	TKT	Transketolase OS=Oryctolagus cuniculus (Rabbit) GN=TKT PE=3 SV=2		Typical	1	1	1	1	Typical	3	3	3	3	Typical	1	1	1	1	Typical	1	1	1	1	Typical	2	2	2	2	Typical	2	3	3	3	Typical	2	3	3	3	Typical	2	3	3	3	Typical	4	6	6	6
tr|G1TE76|G1TE76_RABIT	EIF4H	Uncharacterized protein OS=Oryctolagus cuniculus (Rabbit) GN=EIF4H PE=4 SV=1		Typical	2	18	18	18	Typical	4	13	13	13	Typical	2	17	17	17	Typical	3	16	16	16	Typical	4	16	16	16	Typical	2	17	17	17	Typical	8	21	21	21	Typical	6	22	22	22	Typical	6	20	20	20
tr|G1TVT1|G1TVT1_RABIT	ADD1	Uncharacterized protein OS=Oryctolagus cuniculus (Rabbit) GN=ADD1 PE=4 SV=1		Typical	16	40	37	38.5432	Typical	17	31	28	29.5432	Typical	18	29	27	28.0288	Typical	12	25	25	25	Typical	13	28	28	28	Typical	14	32	29	30.5432	Typical	13	27	24	25.5432	Typical	11	20	17	18.5432	Typical	11	19	17	18.0288
tr|G1SE76|G1SE76_RABIT	RPL23 (InterPro)	Uncharacterized protein OS=Oryctolagus cuniculus (Rabbit) GN=RPL23A PE=1 SV=1		Typical	6	17	17	17	Typical	6	18	18	18	Typical	5	17	17	17	Typical	6	26	26	26	Typical	6	25	25	25	Typical	7	33	33	33	Typical	6	22	22	22	Typical	5	21	21	21	Typical	7	24	24	24
tr|G1SDN2|G1SDN2_RABIT	KRT17	Uncharacterized protein OS=Oryctolagus cuniculus (Rabbit) GN=KRT17 PE=3 SV=1		Subset	2	4	0	0.0162465	Subset	2	3	0	0.0123249	Subset	2	4	0	0.0162465	Typical	7	21	1	2.54538	Subset	2	7	0	0.0285714	Subset	1	2	0	0.00840336	Subset	2	6	0	0.0243697	Subset	2	5	0	0.0204482	Subset	3	9	0	0.0353307
tr|G1SYS4|G1SYS4_RABIT	EIF1A (InterPro)	Uncharacterized protein OS=Oryctolagus cuniculus (Rabbit) GN=EIF1AX PE=3 SV=1		Typical	5	19	4	12.125	Subset	3	11	0	5.5	Subset	3	13	0	6.125	Subset	3	5	0	2.25	Subset	2	7	0	4.9375	Typical	4	14	2	8.5	Typical	5	11	3	8.25	Subset	3	7	0	4.25	Typical	3	6	1	3.25
tr|G1U5Q4|G1U5Q4_RABIT	EXOC8	Uncharacterized protein OS=Oryctolagus cuniculus (Rabbit) GN=EXOC8 PE=4 SV=1		Typical	3	6	6	6	Typical	4	6	6	6	Typical	4	7	7	7	Typical	1	1	1	1		0	0	0	0	Typical	3	4	4	4	Sameset	2	2	2	2	Sameset	2	4	4	4	Sameset	2	2	2	2
tr|G1U9T8|G1U9T8_RABIT	CCT4	T-complex protein 1 subunit delta OS=Oryctolagus cuniculus (Rabbit) GN=CCT4 PE=3 SV=1		Typical	3	4	4	4	Typical	17	25	25	25	Typical	8	14	14	14	Typical	6	8	8	8	Typical	2	4	4	4	Typical	3	5	5	5	Typical	11	16	16	16	Typical	16	30	30	30	Typical	13	21	21	21
tr|G1T1V9|G1T1V9_RABIT	HSPA2	Uncharacterized protein OS=Oryctolagus cuniculus (Rabbit) GN=HSPA2 PE=3 SV=1		Typical	12	87	1	1.24644	Typical	15	87	2	2.24438	Typical	13	97	1	1.27626	Subset	13	106	0	0.305642	Subset	11	97	0	0.279789	Typical	12	102	1	1.29053	Typical	11	96	1	1.27419	Subset	13	101	0	0.291975	Subset	11	92	0	0.265827
tr|G1STW0|G1STW0_RABIT	RPL7 (InterPro)	Uncharacterized protein OS=Oryctolagus cuniculus (Rabbit) PE=1 SV=1		Typical	12	39	26	33.2065	Typical	15	53	35	44.9783	Typical	13	47	30	39.4239	Typical	17	70	49	60.6413	Typical	16	79	59	70.087	Typical	15	69	48	59.6413	Typical	12	46	31	39.3152	Typical	12	55	40	48.3152	Typical	12	57	39	48.9783
tr|G1SL16|G1SL16_RABIT	SRSF7	Uncharacterized protein OS=Oryctolagus cuniculus (Rabbit) GN=SRSF7 PE=4 SV=2		Typical	2	4	4	4		0	0	0	0	Typical	1	2	2	2		0	0	0	0		0	0	0	0		0	0	0	0		0	0	0	0	Typical	1	1	1	1		0	0	0	0
tr|G1TBL6|G1TBL6_RABIT	CLTC	Clathrin heavy chain OS=Oryctolagus cuniculus (Rabbit) GN=CLTC PE=3 SV=2		Typical	40	109	109	109	Typical	44	111	111	111	Typical	46	123	123	123	Typical	32	76	76	76	Typical	28	78	78	78	Typical	18	58	58	58	Typical	36	82	82	82	Typical	36	96	96	96	Typical	31	84	84	84
tr|G1TUT9|G1TUT9_RABIT	RPS5 (InterPro)	Uncharacterized protein OS=Oryctolagus cuniculus (Rabbit) GN=RPS2 PE=1 SV=1		Typical	16	78	23	72.3806	Typical	15	83	23	76.402	Typical	15	65	13	59.1653	Typical	13	57	14	51.935	Typical	13	70	24	64.7337	Typical	13	105	28	97.6335	Typical	13	54	13	49.146	Typical	11	57	17	52.3021	Typical	14	57	18	52.2073
tr|G1T5X2|G1T5X2_RABIT	NCAPD3	Uncharacterized protein OS=Oryctolagus cuniculus (Rabbit) GN=NCAPD3 PE=4 SV=2		Typical	4	4	4	4	Typical	4	4	4	4	Typical	3	4	4	4	Typical	3	3	3	3	Typical	2	2	2	2	Typical	1	1	1	1	Typical	2	2	2	2	Typical	1	1	1	1	Typical	1	1	1	1
tr|G1SN68|G1SN68_RABIT	QARS	Uncharacterized protein OS=Oryctolagus cuniculus (Rabbit) GN=QARS PE=3 SV=1		Typical	16	24	24	24	Typical	11	15	15	15	Typical	8	11	11	11	Typical	10	15	15	15	Typical	10	12	12	12	Typical	6	8	8	8	Typical	20	30	30	30	Typical	15	26	26	26	Typical	9	13	13	13
tr|G1U0V2|G1U0V2_RABIT	SNCA	Alpha-synuclein OS=Oryctolagus cuniculus (Rabbit) GN=SNCA PE=3 SV=1			0	0	0	0	Typical	1	1	1	1		0	0	0	0		0	0	0	0		0	0	0	0		0	0	0	0		0	0	0	0	Typical	2	3	3	3	Typical	1	2	2	2
tr|G1SN21|G1SN21_RABIT	PNP	Uncharacterized protein OS=Oryctolagus cuniculus (Rabbit) GN=PNP PE=4 SV=1		Typical	1	1	1	1		0	0	0	0		0	0	0	0		0	0	0	0	Typical	1	1	1	1	Typical	1	1	1	1	Typical	2	2	2	2		0	0	0	0	Typical	3	3	3	3
tr|G1SIA3|G1SIA3_RABIT	ASCC3	Uncharacterized protein OS=Oryctolagus cuniculus (Rabbit) GN=ASCC3 PE=4 SV=1		Typical	3	5	5	5	Typical	5	5	5	5		0	0	0	0		0	0	0	0		0	0	0	0	Typical	1	2	2	2	Typical	3	3	3	3		0	0	0	0		0	0	0	0
tr|G1T056|G1T056_RABIT	KATNA1	Katanin p60 ATPase-containing subunit A1 OS=Oryctolagus cuniculus (Rabbit) GN=KATNA1 PE=3 SV=2		Typical	3	3	3	3	Typical	3	3	3	3	Typical	3	4	4	4	Typical	2	2	2	2		0	0	0	0	Typical	1	1	1	1	Typical	1	1	1	1	Typical	2	2	2	2		0	0	0	0
sp|Q29426|K2C3_RABIT	KRT3	Keratin, type II cytoskeletal 3 OS=Oryctolagus cuniculus (Rabbit) GN=KRT3 PE=2 SV=1		Typical	3	4	0	0		0	0	0	0		0	0	0	0	Typical	7	28	0	0		0	0	0	0		0	0	0	0	Subset	1	1	0	0	Subset	1	1	0	0	Subset	2	8	0	0
tr|U3KPD5|U3KPD5_RABIT	RPL37	Ribosomal protein L37 OS=Oryctolagus cuniculus (Rabbit) GN=RPL37 PE=1 SV=1		Typical	1	6	6	6	Typical	1	2	2	2		0	0	0	0	Typical	1	2	2	2	Typical	1	1	1	1	Typical	1	2	2	2	Typical	1	2	2	2		0	0	0	0		0	0	0	0
tr|U3KP85|U3KP85_RABIT	IFI35	Uncharacterized protein OS=Oryctolagus cuniculus (Rabbit) GN=IFI35 PE=4 SV=1		Typical	3	3	3	3	Typical	2	2	2	2	Typical	3	3	3	3	Typical	1	1	1	1		0	0	0	0		0	0	0	0		0	0	0	0		0	0	0	0	Sameset	2	2	2	2
tr|G1U3X3|G1U3X3_RABIT		Uncharacterized protein OS=Oryctolagus cuniculus (Rabbit) GN=LOC100342826 PE=4 SV=1		Typical	18	86	20	43.9766	Typical	20	83	24	45.3522	Typical	21	85	27	47.9943	Typical	18	81	23	43.9943	Typical	16	91	27	50.0219	Typical	17	78	23	42.8013	Typical	19	103	45	66.1138	Typical	16	90	37	56.0856	Typical	16	77	27	45.1315
tr|G1U949|G1U949_RABIT	MAPRE1	Uncharacterized protein OS=Oryctolagus cuniculus (Rabbit) GN=MAPRE1 PE=4 SV=1		Typical	2	4	4	4	Typical	3	8	8	8	Typical	3	8	8	8	Typical	3	8	8	8	Typical	2	3	3	3	Typical	2	5	5	5	Typical	4	11	11	11	Typical	4	8	8	8	Typical	5	11	11	11
sp|P25704|ENOB_RABIT	ENO3	Beta-enolase OS=Oryctolagus cuniculus (Rabbit) GN=ENO3 PE=1 SV=4			0	0	0	0		0	0	0	0		0	0	0	0		0	0	0	0		0	0	0	0		0	0	0	0		0	0	0	0	Typical	1	1	1	1	Typical	1	1	1	1
sp|Q8MK67|PEBP1_RABIT	PEBP1 PBP	Phosphatidylethanolamine-binding protein 1 OS=Oryctolagus cuniculus (Rabbit) GN=PEBP1 PE=2 SV=1			0	0	0	0		0	0	0	0		0	0	0	0		0	0	0	0		0	0	0	0		0	0	0	0		0	0	0	0	Typical	1	1	1	1	Typical	1	1	1	1
tr|G1T235|G1T235_RABIT	PSMB6	Proteasome subunit beta type OS=Oryctolagus cuniculus (Rabbit) GN=PSMB6 PE=3 SV=1			0	0	0	0		0	0	0	0		0	0	0	0		0	0	0	0		0	0	0	0		0	0	0	0	Typical	1	1	1	1		0	0	0	0	Typical	1	1	1	1
tr|G1T8G9|G1T8G9_RABIT	PKLR	Pyruvate kinase OS=Oryctolagus cuniculus (Rabbit) GN=PKLR PE=3 SV=1			0	0	0	0		0	0	0	0		0	0	0	0		0	0	0	0		0	0	0	0		0	0	0	0		0	0	0	0		0	0	0	0	Typical	1	2	2	2
tr|G1TQG4|G1TQG4_RABIT	LOC100350339 LOC100342906	Uncharacterized protein OS=Oryctolagus cuniculus (Rabbit) GN=LOC100338350 PE=4 SV=1			0	0	0	0		0	0	0	0		0	0	0	0		0	0	0	0		0	0	0	0		0	0	0	0	Typical	1	1	1	1	Typical	1	1	1	1		0	0	0	0
tr|G1SZ25|G1SZ25_RABIT	LOC100351756	Uncharacterized protein OS=Oryctolagus cuniculus (Rabbit) GN=LOC100351756 PE=4 SV=1			0	0	0	0		0	0	0	0		0	0	0	0		0	0	0	0		0	0	0	0		0	0	0	0	Typical	1	1	1	1		0	0	0	0	Typical	1	1	1	1
tr|G1THZ6|G1THZ6_RABIT		Uncharacterized protein OS=Oryctolagus cuniculus (Rabbit) PE=4 SV=2			0	0	0	0		0	0	0	0		0	0	0	0		0	0	0	0		0	0	0	0		0	0	0	0	Sameset	1	1	1	1		0	0	0	0	Typical	1	1	1	1
tr|G1T089|G1T089_RABIT	THUMPD3	Uncharacterized protein OS=Oryctolagus cuniculus (Rabbit) GN=THUMPD3 PE=4 SV=1			0	0	0	0		0	0	0	0		0	0	0	0		0	0	0	0		0	0	0	0		0	0	0	0		0	0	0	0	Typical	2	2	2	2		0	0	0	0
tr|G1T765|G1T765_RABIT	MDH2	Malate dehydrogenase OS=Oryctolagus cuniculus (Rabbit) GN=MDH2 PE=3 SV=1			0	0	0	0		0	0	0	0		0	0	0	0		0	0	0	0		0	0	0	0		0	0	0	0	Typical	2	2	2	2		0	0	0	0		0	0	0	0
tr|G1SYL3|G1SYL3_RABIT	TNPO3	Uncharacterized protein OS=Oryctolagus cuniculus (Rabbit) GN=TNPO3 PE=4 SV=1			0	0	0	0		0	0	0	0		0	0	0	0		0	0	0	0		0	0	0	0		0	0	0	0		0	0	0	0		0	0	0	0	Typical	2	2	2	2
tr|G1U3B8|G1U3B8_RABIT	TXNL1	Uncharacterized protein OS=Oryctolagus cuniculus (Rabbit) GN=TXNL1 PE=4 SV=1			0	0	0	0		0	0	0	0		0	0	0	0		0	0	0	0		0	0	0	0		0	0	0	0		0	0	0	0	Typical	1	1	1	1	Typical	1	1	1	1
tr|G1TVI8|G1TVI8_RABIT	SAMD9L	Uncharacterized protein OS=Oryctolagus cuniculus (Rabbit) GN=SAMD9L PE=4 SV=1			0	0	0	0		0	0	0	0		0	0	0	0		0	0	0	0		0	0	0	0		0	0	0	0	Typical	1	1	1	1	Typical	1	1	1	1		0	0	0	0
tr|G1TKE3|G1TKE3_RABIT	TAGLN2	Transgelin OS=Oryctolagus cuniculus (Rabbit) GN=TAGLN2 PE=3 SV=1			0	0	0	0		0	0	0	0		0	0	0	0		0	0	0	0		0	0	0	0		0	0	0	0	Typical	1	1	1	1		0	0	0	0	Typical	1	1	1	1
tr|G1SRH7|G1SRH7_RABIT	SRSF3	Uncharacterized protein OS=Oryctolagus cuniculus (Rabbit) GN=SRSF3 PE=4 SV=1			0	0	0	0		0	0	0	0		0	0	0	0		0	0	0	0		0	0	0	0		0	0	0	0		0	0	0	0		0	0	0	0	Typical	1	2	2	2
tr|G1SMW3|G1SMW3_RABIT	LARP4B	Uncharacterized protein OS=Oryctolagus cuniculus (Rabbit) GN=LARP4B PE=4 SV=2			0	0	0	0		0	0	0	0		0	0	0	0	Typical	1	1	1	1	Typical	3	3	3	3	Typical	1	1	1	1	Typical	1	1	1	1		0	0	0	0	Typical	1	1	1	1
tr|B7NZD7|B7NZD7_RABIT	PSMB4	Proteasome subunit beta type OS=Oryctolagus cuniculus (Rabbit) GN=PSMB4 PE=3 SV=1			0	0	0	0		0	0	0	0		0	0	0	0	Typical	1	1	1	1		0	0	0	0		0	0	0	0		0	0	0	0	Typical	1	1	1	1	Typical	1	1	1	1
tr|G1SQ11|G1SQ11_RABIT	ALDH18A1	Uncharacterized protein OS=Oryctolagus cuniculus (Rabbit) GN=ALDH18A1 PE=3 SV=1			0	0	0	0		0	0	0	0		0	0	0	0		0	0	0	0		0	0	0	0	Typical	1	1	1	1	Typical	1	1	1	1		0	0	0	0	Typical	1	1	1	1
tr|G1TMQ5|G1TMQ5_RABIT	MYCBP	Uncharacterized protein OS=Oryctolagus cuniculus (Rabbit) GN=MYCBP PE=4 SV=2			0	0	0	0		0	0	0	0		0	0	0	0		0	0	0	0	Typical	1	1	1	1		0	0	0	0	Typical	1	1	1	1	Typical	1	1	1	1		0	0	0	0
tr|G1T2C3|G1T2C3_RABIT	CSDE1	Uncharacterized protein OS=Oryctolagus cuniculus (Rabbit) GN=CSDE1 PE=4 SV=2		Typical	12	23	23	23	Typical	11	21	21	21	Typical	10	19	19	19	Typical	11	20	20	20	Typical	8	12	12	12	Typical	8	13	13	13	Typical	10	16	16	16	Typical	6	11	11	11	Typical	6	13	13	13
tr|G1SR41|G1SR41_RABIT	STMN1	Stathmin OS=Oryctolagus cuniculus (Rabbit) GN=STMN1 PE=3 SV=1			0	0	0	0		0	0	0	0		0	0	0	0	Typical	1	1	1	1	Typical	1	1	1	1		0	0	0	0	Typical	1	1	1	1		0	0	0	0	Typical	1	1	1	1
tr|G1TTM0|G1TTM0_RABIT	STMN2	Stathmin OS=Oryctolagus cuniculus (Rabbit) GN=STMN2 PE=3 SV=2			0	0	0	0		0	0	0	0		0	0	0	0	Typical	1	1	1	1	Typical	1	1	1	1		0	0	0	0	Typical	1	1	1	1		0	0	0	0	Typical	1	1	1	1
tr|G1SNX5|G1SNX5_RABIT	ILF2	Uncharacterized protein OS=Oryctolagus cuniculus (Rabbit) GN=ILF2 PE=4 SV=2		Typical	6	8	8	8	Typical	4	6	6	6	Typical	3	4	4	4	Typical	5	8	8	8	Typical	5	7	7	7	Typical	4	4	4	4	Typical	3	3	3	3	Typical	2	2	2	2	Typical	3	3	3	3
tr|G1SRB6|G1SRB6_RABIT	PPID	Uncharacterized protein OS=Oryctolagus cuniculus (Rabbit) GN=PPID PE=4 SV=1			0	0	0	0	Typical	2	3	3	3	Typical	2	2	2	2	Typical	2	3	3	3	Typical	1	2	2	2	Typical	1	1	1	1	Typical	1	2	2	2	Typical	3	4	4	4	Typical	4	5	5	5
tr|B7NZQ2|B7NZQ2_RABIT	RPL10	Ribosomal protein L10 (Predicted) OS=Oryctolagus cuniculus (Rabbit) GN=RPL10 PE=1 SV=1		Typical	14	70	70	70	Typical	18	78	78	78	Typical	18	82	82	82	Typical	18	94	94	94	Typical	17	107	107	107	Typical	20	121	121	121	Typical	13	58	58	58	Typical	12	54	54	54	Typical	14	62	62	62
tr|G1SKF7|G1SKF7_RABIT	RPL6	60S ribosomal protein L6 OS=Oryctolagus cuniculus (Rabbit) GN=RPL6 PE=3 SV=1		Typical	18	67	67	67	Typical	20	76	76	76	Typical	21	77	77	77	Typical	21	92	92	92	Typical	20	113	113	113	Typical	19	114	114	114	Typical	18	73	73	73	Typical	20	85	85	85	Typical	20	77	77	77
tr|G1SVP3|G1SVP3_RABIT	CFAP43	Uncharacterized protein OS=Oryctolagus cuniculus (Rabbit) GN=CFAP43 PE=4 SV=2			0	0	0	0	Typical	1	2	2	2	Typical	1	1	1	1	Typical	1	3	3	3	Typical	1	3	3	3	Typical	1	1	1	1	Typical	1	2	2	2	Typical	1	3	3	3	Typical	1	3	3	3
tr|G1TMS5|G1TMS5_RABIT	CCT5	Uncharacterized protein OS=Oryctolagus cuniculus (Rabbit) GN=CCT5 PE=3 SV=1		Typical	2	3	3	3	Typical	11	23	23	23	Typical	7	22	22	22	Typical	8	9	9	9	Typical	5	7	7	7	Typical	3	4	4	4	Typical	10	15	15	15	Typical	16	33	33	33	Typical	17	28	28	28
tr|B7NZS8|B7NZS8_RABIT	RPS9	Ribosomal protein S9 (Predicted) OS=Oryctolagus cuniculus (Rabbit) GN=RPS9 PE=1 SV=1		Typical	17	65	65	65	Typical	19	60	60	60	Typical	17	60	60	60	Typical	21	74	74	74	Typical	17	81	81	81	Typical	19	87	87	87	Typical	15	48	48	48	Typical	18	44	44	44	Typical	17	46	46	46
tr|U3KLT5|U3KLT5_RABIT	EIF5B	Uncharacterized protein OS=Oryctolagus cuniculus (Rabbit) GN=EIF5B PE=4 SV=1		Typical	14	45	45	45	Typical	14	34	34	34	Typical	18	51	51	51	Typical	16	36	36	36	Typical	14	36	36	36	Typical	13	26	26	26	Typical	13	31	31	31	Typical	16	31	31	31	Typical	12	30	30	30
sp|Q95KK4|SSBP_RABIT	SSBP1 SSB	Single-stranded DNA-binding protein, mitochondrial OS=Oryctolagus cuniculus (Rabbit) GN=SSBP1 PE=2 SV=1		Typical	2	2	2	2		0	0	0	0		0	0	0	0	Typical	1	2	2	2	Typical	1	2	2	2	Typical	1	2	2	2		0	0	0	0		0	0	0	0		0	0	0	0
tr|G1TI26|G1TI26_RABIT	LOC100351336	Uncharacterized protein OS=Oryctolagus cuniculus (Rabbit) GN=LOC100351336 PE=4 SV=1		Sameset	8	35	35	35	Sameset	11	48	48	48	Sameset	9	39	39	39	Typical	12	62	62	62	Typical	12	68	68	68	Sameset	8	50	50	50	Sameset	9	41	41	41	Sameset	9	47	47	47	Sameset	9	48	48	48
tr|G1SY91|G1SY91_RABIT	CNOT2	Uncharacterized protein OS=Oryctolagus cuniculus (Rabbit) GN=CNOT2 PE=4 SV=2		Typical	1	2	2	2		0	0	0	0		0	0	0	0		0	0	0	0		0	0	0	0	Typical	1	2	2	2		0	0	0	0		0	0	0	0		0	0	0	0
tr|G1SEF8|G1SEF8_RABIT	NAPA	Uncharacterized protein OS=Oryctolagus cuniculus (Rabbit) GN=NAPA PE=4 SV=1		Typical	1	2	2	2		0	0	0	0		0	0	0	0		0	0	0	0		0	0	0	0	Typical	1	2	2	2		0	0	0	0		0	0	0	0		0	0	0	0
tr|G1SPB6|G1SPB6_RABIT	ACSL1	Uncharacterized protein OS=Oryctolagus cuniculus (Rabbit) GN=ACSL1 PE=4 SV=2		Typical	1	1	1	1	Typical	1	1	1	1		0	0	0	0		0	0	0	0	Typical	1	1	1	1	Typical	1	1	1	1		0	0	0	0		0	0	0	0		0	0	0	0
tr|G1T5R3|G1T5R3_RABIT	TCF25	Uncharacterized protein OS=Oryctolagus cuniculus (Rabbit) GN=TCF25 PE=4 SV=2		Typical	1	1	1	1	Typical	1	1	1	1		0	0	0	0	Typical	1	1	1	1		0	0	0	0	Typical	1	1	1	1		0	0	0	0		0	0	0	0		0	0	0	0
tr|G1SPD2|G1SPD2_RABIT	PSMD5	Uncharacterized protein OS=Oryctolagus cuniculus (Rabbit) GN=PSMD5 PE=4 SV=1		Typical	1	1	1	1	Typical	1	1	1	1		0	0	0	0	Typical	1	1	1	1	Typical	1	1	1	1		0	0	0	0		0	0	0	0		0	0	0	0		0	0	0	0
tr|G1SZK4|G1SZK4_RABIT	PDAP1	Uncharacterized protein OS=Oryctolagus cuniculus (Rabbit) GN=PDAP1 PE=4 SV=1		Typical	10	42	42	42	Typical	10	36	36	36	Typical	11	38	38	38	Typical	11	43	43	43	Typical	8	25	25	25	Typical	10	44	44	44	Typical	8	34	34	34	Typical	8	22	22	22	Typical	8	26	26	26
sp|Q28618|YBOX1_RABIT	YBX1 NSEP1 YB1	Nuclease-sensitive element-binding protein 1 OS=Oryctolagus cuniculus (Rabbit) GN=YBX1 PE=1 SV=3		Typical	11	58	4	26.7812	Typical	9	48	2	21.4062	Typical	11	52	2	23.0938	Typical	8	38	1	16.6094	Typical	8	45	3	20.7188	Typical	9	59	3	26.625	Typical	11	65	6	30.8906	Typical	9	57	3	25.7812	Typical	9	50	3	22.8281
sp|P00939|TPIS_RABIT	TPI1	Triosephosphate isomerase OS=Oryctolagus cuniculus (Rabbit) GN=TPI1 PE=1 SV=1			0	0	0	0	Typical	3	4	4	4	Typical	2	2	2	2	Typical	2	2	2	2	Typical	3	3	3	3	Typical	1	1	1	1	Typical	4	4	4	4	Typical	3	3	3	3	Typical	5	5	5	5
tr|G1TIB4|G1TIB4_RABIT	RPS28 (InterPro)	Uncharacterized protein OS=Oryctolagus cuniculus (Rabbit) GN=RPS28 PE=1 SV=1		Typical	4	16	16	16	Typical	6	25	25	25	Typical	6	22	22	22	Typical	6	27	27	27	Typical	6	41	41	41	Typical	5	31	31	31	Typical	4	23	23	23	Typical	5	30	30	30	Typical	5	23	23	23
tr|G1TQV4|G1TQV4_RABIT	NECAP2	Uncharacterized protein OS=Oryctolagus cuniculus (Rabbit) GN=NECAP2 PE=4 SV=1		Typical	1	1	1	1		0	0	0	0	Typical	1	1	1	1		0	0	0	0	Typical	1	1	1	1		0	0	0	0		0	0	0	0		0	0	0	0		0	0	0	0
tr|G1SY30|G1SY30_RABIT	SNRNP200	Uncharacterized protein OS=Oryctolagus cuniculus (Rabbit) GN=SNRNP200 PE=4 SV=1		Typical	1	1	1	1		0	0	0	0	Typical	1	1	1	1		0	0	0	0		0	0	0	0	Typical	1	1	1	1		0	0	0	0		0	0	0	0		0	0	0	0
tr|G1TJ15|G1TJ15_RABIT	LOC100347836	Uncharacterized protein OS=Oryctolagus cuniculus (Rabbit) GN=LOC100347836 PE=4 SV=1		Typical	1	1	1	1	Typical	1	1	1	1		0	0	0	0		0	0	0	0	Typical	1	1	1	1		0	0	0	0		0	0	0	0		0	0	0	0		0	0	0	0
tr|G1SX90|G1SX90_RABIT	PIK3C3	Phosphatidylinositol 3-kinase OS=Oryctolagus cuniculus (Rabbit) GN=PIK3C3 PE=3 SV=2		Typical	1	1	1	1	Typical	1	1	1	1		0	0	0	0		0	0	0	0		0	0	0	0	Typical	1	1	1	1		0	0	0	0		0	0	0	0		0	0	0	0
tr|G1U840|G1U840_RABIT	STK24	Uncharacterized protein OS=Oryctolagus cuniculus (Rabbit) GN=STK24 PE=4 SV=1		Sameset	2	2	0	0.444444	Subset	3	4	0	0.888889	Typical	4	5	2	2.66667	Subset	1	1	0	0.222222	Sameset	1	2	0	0.444444		0	0	0	0		0	0	0	0	Subset	1	3	0	0.666667	Sameset	1	1	0	0.222222
tr|G1SZ72|G1SZ72_RABIT	FXR2	Uncharacterized protein OS=Oryctolagus cuniculus (Rabbit) GN=FXR2 PE=4 SV=2		Typical	10	34	26	29.792	Typical	11	33	28	30.4023	Typical	10	31	27	28.896	Typical	7	22	20	21.0127	Typical	8	23	19	20.7665	Typical	8	29	22	25.2856	Typical	11	25	21	22.7665	Typical	10	26	22	23.7665	Typical	7	17	14	15.2601
tr|G1U7I9|G1U7I9_RABIT	DDX39B	Uncharacterized protein OS=Oryctolagus cuniculus (Rabbit) GN=DDX39B PE=4 SV=1		Typical	2	2	2	2		0	0	0	0		0	0	0	0		0	0	0	0		0	0	0	0		0	0	0	0		0	0	0	0		0	0	0	0		0	0	0	0
tr|G1SK48|G1SK48_RABIT	BLMH	Bleomycin hydrolase OS=Oryctolagus cuniculus (Rabbit) GN=BLMH PE=4 SV=2		Typical	2	2	2	2		0	0	0	0		0	0	0	0		0	0	0	0		0	0	0	0		0	0	0	0		0	0	0	0		0	0	0	0		0	0	0	0
tr|G1T459|G1T459_RABIT	SETD3	Uncharacterized protein OS=Oryctolagus cuniculus (Rabbit) GN=SETD3 PE=4 SV=2		Typical	2	2	2	2		0	0	0	0		0	0	0	0		0	0	0	0		0	0	0	0		0	0	0	0		0	0	0	0		0	0	0	0		0	0	0	0
tr|G1T920|G1T920_RABIT	SEPHS1	Uncharacterized protein OS=Oryctolagus cuniculus (Rabbit) GN=SEPHS1 PE=4 SV=1		Typical	1	2	2	2		0	0	0	0		0	0	0	0		0	0	0	0		0	0	0	0		0	0	0	0		0	0	0	0		0	0	0	0		0	0	0	0
tr|G1T9T9|G1T9T9_RABIT	DHX57	Uncharacterized protein OS=Oryctolagus cuniculus (Rabbit) GN=DHX57 PE=4 SV=2		Typical	2	2	0	0		0	0	0	0		0	0	0	0		0	0	0	0		0	0	0	0		0	0	0	0		0	0	0	0		0	0	0	0		0	0	0	0
tr|G1T3Z6|G1T3Z6_RABIT	PRKAR2B	Uncharacterized protein OS=Oryctolagus cuniculus (Rabbit) GN=PRKAR2B PE=4 SV=1		Typical	1	1	1	1		0	0	0	0	Typical	1	1	1	1		0	0	0	0		0	0	0	0		0	0	0	0		0	0	0	0		0	0	0	0		0	0	0	0
tr|G1SEN2|G1SEN2_RABIT	GIT2	Uncharacterized protein OS=Oryctolagus cuniculus (Rabbit) GN=GIT2 PE=4 SV=1		Typical	1	1	1	1	Typical	1	1	1	1		0	0	0	0		0	0	0	0		0	0	0	0		0	0	0	0		0	0	0	0		0	0	0	0		0	0	0	0
tr|G1T5Q8|G1T5Q8_RABIT	STX12	Uncharacterized protein OS=Oryctolagus cuniculus (Rabbit) GN=STX12 PE=3 SV=1		Typical	1	1	1	1	Typical	1	1	1	1		0	0	0	0		0	0	0	0		0	0	0	0		0	0	0	0		0	0	0	0		0	0	0	0		0	0	0	0
tr|G1TTL1|G1TTL1_RABIT	NAA15	Uncharacterized protein OS=Oryctolagus cuniculus (Rabbit) GN=NAA15 PE=4 SV=1			0	0	0	0	Typical	1	1	1	1	Typical	1	1	1	1		0	0	0	0		0	0	0	0		0	0	0	0		0	0	0	0		0	0	0	0		0	0	0	0
tr|G1SZX9|G1SZX9_RABIT	WWP2	E3 ubiquitin-protein ligase OS=Oryctolagus cuniculus (Rabbit) GN=WWP2 PE=4 SV=1			0	0	0	0	Typical	1	1	1	1	Typical	1	1	1	1		0	0	0	0		0	0	0	0		0	0	0	0		0	0	0	0		0	0	0	0		0	0	0	0
sp|P01840|KAC4_RABIT		Ig kappa-b4 chain C region OS=Oryctolagus cuniculus (Rabbit) PE=1 SV=1			0	0	0	0		0	0	0	0	Typical	1	2	2	2		0	0	0	0		0	0	0	0		0	0	0	0		0	0	0	0		0	0	0	0		0	0	0	0
tr|G1TZV3|G1TZV3_RABIT	AP1M1	Uncharacterized protein OS=Oryctolagus cuniculus (Rabbit) GN=AP1M1 PE=4 SV=1			0	0	0	0	Typical	1	1	1	1	Typical	1	1	1	1		0	0	0	0		0	0	0	0		0	0	0	0		0	0	0	0		0	0	0	0		0	0	0	0
tr|G1TER0|G1TER0_RABIT	EXOC1	Uncharacterized protein OS=Oryctolagus cuniculus (Rabbit) GN=EXOC1 PE=4 SV=1			0	0	0	0	Typical	1	1	1	1	Typical	1	1	1	1		0	0	0	0		0	0	0	0		0	0	0	0		0	0	0	0		0	0	0	0		0	0	0	0
tr|G1SXL6|G1SXL6_RABIT	FRYL	Uncharacterized protein OS=Oryctolagus cuniculus (Rabbit) GN=FRYL PE=4 SV=2			0	0	0	0		0	0	0	0	Typical	2	2	2	2		0	0	0	0		0	0	0	0		0	0	0	0		0	0	0	0		0	0	0	0		0	0	0	0
tr|G1TA74|G1TA74_RABIT	PPFIA2	Uncharacterized protein OS=Oryctolagus cuniculus (Rabbit) GN=PPFIA2 PE=4 SV=2			0	0	0	0	Typical	1	1	1	1	Typical	1	1	1	1		0	0	0	0		0	0	0	0		0	0	0	0		0	0	0	0		0	0	0	0		0	0	0	0
tr|G1SEA7|G1SEA7_RABIT	PRKAA1	Uncharacterized protein OS=Oryctolagus cuniculus (Rabbit) GN=PRKAA1 PE=4 SV=2			0	0	0	0	Typical	1	1	1	1	Typical	1	1	1	1		0	0	0	0		0	0	0	0		0	0	0	0		0	0	0	0		0	0	0	0		0	0	0	0
tr|G1SKY7|G1SKY7_RABIT		Uncharacterized protein OS=Oryctolagus cuniculus (Rabbit) GN=TARDBP PE=4 SV=2			0	0	0	0	Typical	1	1	1	1	Typical	1	1	1	1		0	0	0	0		0	0	0	0		0	0	0	0		0	0	0	0		0	0	0	0		0	0	0	0
tr|G1TZB2|G1TZB2_RABIT	CNOT10	Uncharacterized protein OS=Oryctolagus cuniculus (Rabbit) GN=CNOT10 PE=4 SV=2			0	0	0	0	Typical	1	1	1	1	Typical	1	1	1	1		0	0	0	0		0	0	0	0		0	0	0	0		0	0	0	0		0	0	0	0		0	0	0	0
tr|G1TXS2|G1TXS2_RABIT	MYO18A	Uncharacterized protein OS=Oryctolagus cuniculus (Rabbit) GN=MYO18A PE=4 SV=2			0	0	0	0	Typical	1	1	1	1	Typical	1	1	1	1		0	0	0	0		0	0	0	0		0	0	0	0		0	0	0	0		0	0	0	0		0	0	0	0
tr|G1TGQ6|G1TGQ6_RABIT	PACS1	Uncharacterized protein OS=Oryctolagus cuniculus (Rabbit) GN=PACS1 PE=4 SV=2			0	0	0	0	Typical	1	1	1	1	Typical	1	1	1	1		0	0	0	0		0	0	0	0		0	0	0	0		0	0	0	0		0	0	0	0		0	0	0	0
tr|G1TBQ5|G1TBQ5_RABIT	NUFIP2	Uncharacterized protein OS=Oryctolagus cuniculus (Rabbit) GN=NUFIP2 PE=4 SV=1		Typical	2	2	2	2	Typical	2	4	4	4	Typical	2	3	3	3	Typical	2	3	3	3	Typical	2	2	2	2	Typical	2	4	4	4	Typical	1	1	1	1	Typical	2	2	2	2		0	0	0	0
tr|G1TUP1|G1TUP1_RABIT	PDCD6	Uncharacterized protein OS=Oryctolagus cuniculus (Rabbit) GN=PDCD6 PE=4 SV=1		Typical	3	5	5	5	Typical	2	2	2	2	Typical	1	2	2	2	Typical	2	3	3	3	Typical	2	2	2	2	Typical	3	3	3	3	Typical	2	2	2	2	Typical	1	1	1	1		0	0	0	0
tr|G1SRW4|G1SRW4_RABIT	EMILIN1	Uncharacterized protein OS=Oryctolagus cuniculus (Rabbit) GN=EMILIN1 PE=4 SV=1		Typical	3	5	5	5	Typical	2	2	2	2	Typical	2	2	2	2	Typical	1	1	1	1	Typical	1	1	1	1	Typical	1	2	2	2	Typical	2	2	2	2	Typical	1	1	1	1		0	0	0	0
tr|G1SML9|G1SML9_RABIT	DNAJA1	Uncharacterized protein OS=Oryctolagus cuniculus (Rabbit) GN=DNAJA1 PE=3 SV=1		Typical	2	3	3	3	Typical	3	3	3	3	Typical	2	3	3	3	Typical	2	3	3	3	Typical	1	1	1	1		0	0	0	0	Typical	1	2	2	2	Typical	1	1	1	1		0	0	0	0
tr|G1TRH5|G1TRH5_RABIT	CORO1C	Coronin OS=Oryctolagus cuniculus (Rabbit) GN=CORO1C PE=3 SV=1			0	0	0	0	Typical	1	1	1	1	Typical	1	1	1	1	Typical	3	3	3	3		0	0	0	0		0	0	0	0	Typical	1	1	1	1	Typical	2	2	2	2	Typical	2	3	3	3
tr|G1SX00|G1SX00_RABIT	PSIP1	Uncharacterized protein OS=Oryctolagus cuniculus (Rabbit) GN=PSIP1 PE=4 SV=1			0	0	0	0	Typical	1	2	2	2		0	0	0	0		0	0	0	0	Typical	1	3	3	3	Typical	1	3	3	3	Typical	1	3	3	3		0	0	0	0	Typical	1	3	3	3
tr|G1SUC8|G1SUC8_RABIT	EIF3E	Eukaryotic translation initiation factor 3 subunit E OS=Oryctolagus cuniculus (Rabbit) GN=EIF3E PE=1 SV=2		Typical	21	55	55	55	Typical	19	49	49	49	Typical	18	49	49	49	Typical	21	50	50	50	Typical	18	52	52	52	Typical	18	57	57	57	Typical	18	43	43	43	Typical	15	38	38	38	Typical	13	32	32	32
tr|G1TFL3|G1TFL3_RABIT		Uncharacterized protein OS=Oryctolagus cuniculus (Rabbit) PE=4 SV=1			0	0	0	0	Typical	1	2	2	2	Typical	1	2	2	2		0	0	0	0	Typical	1	3	3	3		0	0	0	0	Typical	1	3	3	3	Typical	1	3	3	3	Typical	2	3	3	3
tr|G1TGI6|G1TGI6_RABIT	RPSA	Uncharacterized protein OS=Oryctolagus cuniculus (Rabbit) PE=1 SV=1		Typical	13	49	0	0	Typical	12	44	0	0	Typical	11	44	0	0	Typical	14	57	0	0	Typical	14	64	0	0	Typical	13	47	0	0	Sameset	10	30	0	0	Typical	12	34	0	0	Typical	11	36	0	0
tr|G1U6N2|G1U6N2_RABIT	RPLP0	60S acidic ribosomal protein P0 OS=Oryctolagus cuniculus (Rabbit) GN=RPLP0 PE=1 SV=1		Typical	12	45	8	32.2556	Typical	13	47	8	33.5667	Typical	13	42	8	30.2889	Typical	13	60	5	41.0556	Typical	13	67	8	46.6778	Typical	13	66	7	45.6778	Typical	11	49	5	33.8444	Typical	12	44	4	30.2222	Typical	12	54	6	37.4667
tr|G1TFM5|G1TFM5_RABIT	RPS5	Uncharacterized protein OS=Oryctolagus cuniculus (Rabbit) GN=RPS5 PE=1 SV=1		Typical	18	71	71	71	Typical	20	72	72	72	Typical	17	63	63	63	Typical	18	80	80	80	Typical	18	93	93	93	Typical	18	101	101	101	Typical	16	51	51	51	Typical	15	53	53	53	Typical	15	53	53	53
tr|G1SCS1|G1SCS1_RABIT	EXOC6	Uncharacterized protein OS=Oryctolagus cuniculus (Rabbit) GN=EXOC6 PE=4 SV=1		Typical	2	2	2	2	Typical	2	2	2	2	Typical	2	3	3	3	Typical	2	3	3	3	Typical	2	4	4	4	Typical	3	3	3	3	Typical	1	1	1	1	Typical	1	1	1	1		0	0	0	0
tr|G1SHI7|G1SHI7_RABIT	ASAP1	Uncharacterized protein OS=Oryctolagus cuniculus (Rabbit) GN=ASAP1 PE=4 SV=1		Typical	7	11	11	11	Typical	9	14	14	14	Typical	11	20	20	20	Typical	11	20	20	20	Typical	8	14	14	14	Typical	5	9	9	9	Typical	12	21	21	21	Typical	10	20	20	20	Typical	8	15	15	15
tr|G1SLT0|G1SLT0_RABIT	TRIM38	Uncharacterized protein OS=Oryctolagus cuniculus (Rabbit) GN=TRIM38 PE=4 SV=2		Typical	2	3	3	3	Typical	2	2	2	2	Typical	2	2	2	2	Typical	1	1	1	1	Typical	2	4	4	4		0	0	0	0	Typical	1	1	1	1		0	0	0	0	Typical	1	1	1	1
tr|U3KNF6|U3KNF6_RABIT	IFIT3	Uncharacterized protein OS=Oryctolagus cuniculus (Rabbit) GN=IFIT3 PE=4 SV=1		Typical	22	105	105	105	Typical	21	108	108	108	Typical	23	111	111	111	Typical	22	108	108	108	Typical	21	123	123	123	Typical	22	97	97	97	Typical	22	122	122	122	Typical	21	108	108	108	Typical	19	102	102	102
tr|G1TGW1|G1TGW1_RABIT	EIF5	Uncharacterized protein OS=Oryctolagus cuniculus (Rabbit) GN=EIF5 PE=4 SV=1		Typical	10	17	15	16.9255	Typical	9	14	13	13.9627	Typical	8	17	17	17	Typical	7	17	17	17	Typical	9	22	21	21.9627	Typical	6	15	15	15	Typical	10	21	20	20.9627	Typical	9	20	19	19.9627	Typical	8	18	18	18
tr|G1TXF6|G1TXF6_RABIT	RPL27	60S ribosomal protein L27 OS=Oryctolagus cuniculus (Rabbit) GN=LOC100356974 PE=1 SV=1		Typical	5	22	22	22	Typical	8	31	31	31	Typical	6	24	24	24	Typical	8	39	39	39	Typical	8	46	46	46	Typical	6	38	38	38	Typical	7	27	27	27	Typical	7	31	31	31	Typical	7	31	31	31
tr|U3KMP1|U3KMP1_RABIT	RAB10	Uncharacterized protein OS=Oryctolagus cuniculus (Rabbit) GN=RAB10 PE=3 SV=1		Subset	2	6	0	0.334641	Subset	2	7	0	0.413072	Typical	3	5	1	1.24575	Typical	3	7	1	1.33464	Subset	2	7	0	0.413072	Typical	2	2	1	1.04444	Typical	3	9	1	1.4915	Subset	2	9	0	0.569935	Subset	2	8	0	0.491503
tr|G1T3D8|G1T3D8_RABIT	RPS24	40S ribosomal protein S24 OS=Oryctolagus cuniculus (Rabbit) GN=RPS24 PE=1 SV=1		Typical	9	50	50	50	Typical	9	62	62	62	Typical	9	60	60	60	Typical	8	68	68	68	Typical	6	63	63	63	Typical	8	67	67	67	Typical	6	53	53	53	Typical	6	42	42	42	Typical	6	34	34	34
tr|G1TU00|G1TU00_RABIT	RPL26L1	Uncharacterized protein OS=Oryctolagus cuniculus (Rabbit) GN=RPL26L1 PE=3 SV=2		Typical	10	28	3	5.41287	Typical	8	31	1	3.89544	Typical	9	33	3	5.89544	Typical	9	41	10	12.992	Typical	10	52	7	11.3432	Typical	9	43	3	6.86059	Typical	9	34	2	5.08847	Typical	8	38	4	7.2815	Typical	8	32	3	5.79893
tr|G1TCW1|G1TCW1_RABIT	TFRC	Uncharacterized protein OS=Oryctolagus cuniculus (Rabbit) GN=TFRC PE=4 SV=2		Typical	24	55	55	55	Typical	23	63	63	63	Typical	28	68	68	68	Typical	29	83	83	83	Typical	26	68	68	68	Typical	20	56	56	56	Typical	28	79	79	79	Typical	25	69	69	69	Typical	22	52	52	52
tr|Q95L83|Q95L83_RABIT		Beta-actin OS=Oryctolagus cuniculus (Rabbit) PE=2 SV=1		Typical	4	6	2	3.125	Typical	5	10	2	3.6875	Typical	5	11	2	3.875	Typical	5	11	2	3.875	Typical	5	11	2	4.0625	Typical	3	9	2	3.3125	Typical	4	10	2	3.5	Typical	5	12	2	4.25	Typical	5	14	2	4.625
sp|P47814|IF1A_RABIT	EIF1A	Eukaryotic translation initiation factor 1A OS=Oryctolagus cuniculus (Rabbit) GN=EIF1A PE=1 SV=2		Typical	4	19	2	15.875	Typical	4	20	3	17.5	Typical	4	20	2	16.875	Subset	3	8	0	6.75	Typical	3	11	2	10.0625	Typical	4	14	3	11.5	Typical	5	16	5	14.75	Typical	3	14	4	12.75	Typical	4	9	1	7.75
tr|G1SG29|G1SG29_RABIT		Uncharacterized protein OS=Oryctolagus cuniculus (Rabbit) GN=TCEB1 PE=4 SV=1		Typical	3	5	5	5	Typical	5	10	10	10	Typical	5	9	9	9	Typical	4	7	7	7	Typical	2	5	5	5	Typical	2	4	4	4	Typical	4	4	4	4	Typical	3	3	3	3	Typical	4	6	6	6
tr|G1SIH5|G1SIH5_RABIT	IFIH1	Uncharacterized protein OS=Oryctolagus cuniculus (Rabbit) GN=IFIH1 PE=4 SV=1		Typical	8	8	8	8	Typical	6	7	7	7	Typical	8	9	9	9	Typical	4	4	4	4	Typical	3	5	5	5	Typical	3	5	5	5	Typical	4	4	4	4	Typical	5	6	6	6	Typical	3	3	3	3
tr|G1T489|G1T489_RABIT		Uncharacterized protein OS=Oryctolagus cuniculus (Rabbit) GN=ACP1 PE=4 SV=1			0	0	0	0	Typical	1	1	1	1		0	0	0	0		0	0	0	0		0	0	0	0		0	0	0	0	Typical	1	2	2	2	Typical	1	1	1	1	Typical	1	1	1	1
tr|G1SW46|G1SW46_RABIT	RNASEH2B	Uncharacterized protein OS=Oryctolagus cuniculus (Rabbit) GN=RNASEH2B PE=4 SV=2			0	0	0	0		0	0	0	0	Typical	1	1	1	1		0	0	0	0		0	0	0	0		0	0	0	0	Typical	1	1	1	1	Typical	1	2	2	2	Typical	1	1	1	1
sp|Q28719|PTGR1_RABIT	PTGR1 LTB4DH	Prostaglandin reductase 1 OS=Oryctolagus cuniculus (Rabbit) GN=PTGR1 PE=2 SV=1			0	0	0	0	Typical	1	1	1	1		0	0	0	0	Typical	1	1	1	1		0	0	0	0		0	0	0	0	Typical	1	1	1	1	Typical	1	2	2	2	Typical	1	1	1	1
tr|G1T661|G1T661_RABIT	SORT1	Uncharacterized protein OS=Oryctolagus cuniculus (Rabbit) GN=SORT1 PE=4 SV=2			0	0	0	0	Typical	1	1	1	1		0	0	0	0	Typical	1	2	2	2		0	0	0	0	Typical	1	2	2	2	Typical	1	1	1	1	Typical	1	1	1	1	Typical	1	2	2	2
tr|G1SR03|G1SR03_RABIT	VCP	Uncharacterized protein OS=Oryctolagus cuniculus (Rabbit) GN=VCP PE=3 SV=1		Typical	8	9	9	9	Typical	8	12	12	12	Typical	6	9	9	9	Typical	6	8	8	8	Typical	6	7	7	7	Typical	4	5	5	5	Typical	8	13	13	13	Typical	8	14	14	14	Typical	8	12	12	12
tr|G1T0U5|G1T0U5_RABIT	TIA1	Uncharacterized protein OS=Oryctolagus cuniculus (Rabbit) GN=TIA1 PE=4 SV=1		Typical	5	11	4	5.72034	Typical	4	14	3	5.70339	Typical	7	14	7	8.72034	Typical	4	9	3	4.47458	Typical	3	6	2	2.98305	Typical	4	11	3	4.9661	Typical	3	11	3	4.9661	Typical	3	7	2	3.22881	Typical	3	6	2	2.98305
tr|G1SIP2|G1SIP2_RABIT	HNRNPL	Uncharacterized protein OS=Oryctolagus cuniculus (Rabbit) GN=HNRNPL PE=4 SV=1		Typical	6	9	9	9	Typical	4	4	4	4	Typical	4	5	5	5	Typical	2	2	2	2	Typical	1	1	1	1		0	0	0	0	Typical	3	3	3	3	Typical	4	4	4	4	Typical	2	2	2	2
sp|O77622|TCPZ_RABIT	CCT6	T-complex protein 1 subunit zeta OS=Oryctolagus cuniculus (Rabbit) GN=CCT6 PE=1 SV=3		Typical	3	5	5	5	Typical	11	23	23	23	Typical	9	22	22	22	Typical	5	7	7	7	Typical	5	7	7	7	Typical	4	4	4	4	Typical	9	16	16	16	Typical	13	33	33	33	Typical	10	20	20	20
tr|G1SUU7|G1SUU7_RABIT	RTCB	tRNA-splicing ligase RtcB homolog OS=Oryctolagus cuniculus (Rabbit) GN=RTCB PE=3 SV=2		Typical	9	24	24	24	Typical	9	24	24	24	Typical	9	22	22	22	Typical	8	21	21	21	Typical	8	19	19	19	Typical	6	16	16	16	Typical	8	19	19	19	Typical	8	16	16	16	Typical	7	13	13	13
tr|G1SH81|G1SH81_RABIT	EGD2 (InterPro)	Uncharacterized protein OS=Oryctolagus cuniculus (Rabbit) GN=NACA2 PE=4 SV=2		Typical	4	6	6	6	Typical	4	10	10	10	Typical	4	7	7	7	Typical	3	13	13	13	Typical	3	20	20	20	Typical	2	5	5	5	Typical	4	13	13	13	Typical	3	9	9	9	Typical	4	9	9	9
tr|G1SHD9|G1SHD9_RABIT	IFRD2	Uncharacterized protein OS=Oryctolagus cuniculus (Rabbit) GN=IFRD2 PE=4 SV=1			0	0	0	0	Typical	2	2	2	2	Typical	1	1	1	1	Typical	4	6	6	6	Typical	3	3	3	3	Typical	3	5	5	5	Typical	2	2	2	2	Typical	1	2	2	2	Typical	2	3	3	3
tr|G1T495|G1T495_RABIT	HSPA14	Uncharacterized protein OS=Oryctolagus cuniculus (Rabbit) GN=HSPA14 PE=3 SV=1		Typical	1	2	2	2	Typical	3	5	5	5	Typical	2	3	3	3	Typical	1	2	2	2	Typical	2	4	4	4	Typical	1	3	3	3	Typical	2	2	2	2	Typical	1	1	1	1	Typical	1	1	1	1
tr|G1SVQ4|G1SVQ4_RABIT	PIN4	Uncharacterized protein OS=Oryctolagus cuniculus (Rabbit) GN=PIN4 PE=4 SV=1		Typical	3	3	3	3	Typical	1	1	1	1	Typical	2	2	2	2	Typical	1	1	1	1	Typical	2	2	2	2		0	0	0	0	Typical	2	5	5	5	Typical	2	3	3	3	Typical	2	3	3	3
tr|G1SKE0|G1SKE0_RABIT	MAPRE2	Uncharacterized protein OS=Oryctolagus cuniculus (Rabbit) GN=MAPRE2 PE=4 SV=1		Typical	1	1	1	1	Typical	2	2	2	2	Typical	2	3	3	3	Typical	1	1	1	1	Typical	2	2	2	2	Typical	2	2	2	2	Typical	3	3	3	3	Typical	2	4	4	4	Typical	2	4	4	4
tr|G1TIR1|G1TIR1_RABIT	TNRC6B	Uncharacterized protein OS=Oryctolagus cuniculus (Rabbit) GN=TNRC6B PE=4 SV=2		Typical	2	2	2	2	Typical	1	1	1	1	Typical	2	3	3	3	Typical	4	4	4	4	Typical	3	3	3	3	Typical	1	1	1	1	Typical	5	6	6	6	Typical	3	4	4	4	Typical	1	1	1	1
tr|G1SCW7|G1SCW7_RABIT	ABCF2	Uncharacterized protein OS=Oryctolagus cuniculus (Rabbit) GN=ABCF2 PE=3 SV=2		Typical	7	13	13	13	Typical	5	9	9	9	Typical	4	7	7	7	Typical	4	9	9	9	Typical	5	13	13	13	Typical	3	5	5	5	Typical	4	10	10	10	Typical	3	4	4	4	Typical	2	3	3	3
tr|G1TWC2|G1TWC2_RABIT	TAOK3	Uncharacterized protein OS=Oryctolagus cuniculus (Rabbit) GN=TAOK3 PE=4 SV=1		Typical	5	7	7	7	Typical	4	6	6	6	Typical	4	6	6	6	Typical	4	5	5	5	Typical	3	4	4	4	Typical	3	7	7	7	Typical	3	3	3	3	Typical	3	4	4	4	Typical	2	3	3	3
tr|G1SNP4|G1SNP4_RABIT	THRAP3	Uncharacterized protein OS=Oryctolagus cuniculus (Rabbit) GN=THRAP3 PE=4 SV=1		Typical	2	4	4	4	Typical	4	6	6	6	Typical	4	6	6	6	Typical	2	4	4	4	Typical	4	5	5	5	Typical	1	1	1	1	Typical	3	5	5	5	Typical	1	1	1	1	Typical	1	2	2	2
tr|G1T657|G1T657_RABIT	HNRNPDL	Uncharacterized protein OS=Oryctolagus cuniculus (Rabbit) GN=HNRNPDL PE=4 SV=1		Typical	6	11	4	4.61415	Typical	4	8	2	2.8761	Typical	4	7	3	3.78805	Typical	5	7	2	2.83208	Typical	5	12	3	4.00818	Typical	4	9	2	2.92013	Typical	5	9	4	4.83207	Typical	4	5	1	1.48208	Subset	1	1	0	0.0440252
tr|G1SHU8|G1SHU8_RABIT	RPL32	Uncharacterized protein OS=Oryctolagus cuniculus (Rabbit) GN=RPL32 PE=4 SV=1		Typical	6	29	29	29	Typical	10	37	37	37	Typical	7	29	29	29	Typical	9	40	40	40	Typical	10	44	44	44	Typical	9	48	48	48	Typical	7	33	33	33	Typical	7	38	38	38	Typical	7	34	34	34
tr|G1TR75|G1TR75_RABIT		Uncharacterized protein OS=Oryctolagus cuniculus (Rabbit) GN=LOC100353915 PE=3 SV=1		Subset	7	64	0	1.6732	Subset	7	73	0	1.9085	Typical	8	76	2	3.93464	Typical	9	98	2	4.5098	Typical	9	100	3	5.53595	Subset	6	75	0	1.96078	Subset	7	54	0	1.41176	Typical	9	57	1	2.46405	Subset	8	55	0	1.43791
tr|G1T9Y7|G1T9Y7_RABIT	TRIM10	Uncharacterized protein OS=Oryctolagus cuniculus (Rabbit) GN=TRIM10 PE=4 SV=2		Typical	15	46	46	46	Typical	15	43	43	43	Typical	13	36	36	36	Typical	12	35	35	35	Typical	11	33	33	33	Typical	10	31	31	31	Typical	14	36	36	36	Typical	12	29	29	29	Typical	12	28	28	28
tr|G1SKE2|G1SKE2_RABIT	TIAL1	Uncharacterized protein OS=Oryctolagus cuniculus (Rabbit) GN=TIAL1 PE=4 SV=1		Typical	7	23	16	21.2797	Typical	7	21	10	18.2966	Typical	8	20	13	18.2797	Typical	6	14	8	12.5254	Typical	7	14	10	13.0169	Typical	4	13	5	11.0339	Typical	7	18	10	16.0339	Typical	7	16	11	14.7712	Typical	6	10	6	9.01695
tr|G1SCD7|G1SCD7_RABIT	LOC100356907	Uncharacterized protein OS=Oryctolagus cuniculus (Rabbit) GN=LOC100356907 PE=4 SV=1		Typical	8	14	14	14	Typical	8	18	18	18	Typical	9	18	18	18	Typical	10	21	21	21	Typical	7	20	20	20	Typical	8	19	19	19	Typical	7	17	17	17	Typical	8	22	22	22	Typical	7	20	20	20
tr|G1SQV5|G1SQV5_RABIT	EIF3D	Eukaryotic translation initiation factor 3 subunit D OS=Oryctolagus cuniculus (Rabbit) GN=EIF3D PE=3 SV=1		Typical	19	80	80	80	Typical	18	70	70	70	Typical	16	69	69	69	Typical	18	64	64	64	Typical	18	75	75	75	Typical	15	69	69	69	Typical	17	71	71	71	Typical	15	55	55	55	Typical	12	42	42	42
tr|G1SDC7|G1SDC7_RABIT	RPA3	Uncharacterized protein OS=Oryctolagus cuniculus (Rabbit) GN=RPA3 PE=4 SV=1		Typical	7	17	17	17	Typical	5	18	18	18	Typical	6	18	18	18	Typical	5	22	22	22	Typical	5	20	20	20	Typical	5	17	17	17	Typical	5	21	21	21	Typical	5	20	20	20	Typical	4	21	21	21
sp|P43348|TCTP_RABIT	TPT1	Translationally-controlled tumor protein OS=Oryctolagus cuniculus (Rabbit) GN=TPT1 PE=2 SV=2		Typical	6	21	21	21	Typical	6	20	20	20	Typical	7	24	24	24	Typical	4	21	21	21	Typical	3	20	20	20	Typical	3	17	17	17	Typical	3	15	15	15	Typical	4	17	17	17	Typical	4	13	13	13
tr|G1SS80|G1SS80_RABIT	DXO	Uncharacterized protein OS=Oryctolagus cuniculus (Rabbit) GN=DXO PE=4 SV=1		Typical	5	7	7	7	Typical	5	8	8	8	Typical	4	5	5	5	Typical	4	6	6	6	Typical	1	1	1	1	Typical	3	3	3	3	Typical	5	12	12	12	Typical	4	9	9	9	Typical	3	6	6	6
tr|G1SF95|G1SF95_RABIT	HNRNPD	Uncharacterized protein OS=Oryctolagus cuniculus (Rabbit) GN=HNRNPD PE=4 SV=1		Typical	4	9	8	8.65	Typical	4	7	5	6.3	Typical	2	4	2	3.3	Typical	3	5	3	4.3	Typical	3	10	8	9.3	Typical	3	7	5	6.3	Typical	3	6	4	5.3	Typical	3	4	3	3.65	Typical	1	1	1	1
tr|G1U9S2|G1U9S2_RABIT	ALB	Serum albumin OS=Oryctolagus cuniculus (Rabbit) GN=ALB PE=1 SV=1		Typical	10	18	11	11.5414	Sameset	7	20	11	11.696	Sameset	7	18	10	10.6187	Sameset	8	24	13	13.8507	Sameset	8	16	12	12.3093	Typical	5	8	7	7.07734	Sameset	12	27	22	25.1547	Typical	10	23	18	18.3867	Sameset	8	15	11	11.3093
tr|G1SU71|G1SU71_RABIT	PSMB1	Proteasome subunit beta type OS=Oryctolagus cuniculus (Rabbit) GN=PSMB1 PE=3 SV=1		Typical	1	1	1	1	Typical	1	1	1	1	Typical	2	2	2	2	Typical	2	2	2	2	Typical	2	2	2	2		0	0	0	0	Typical	2	2	2	2	Typical	1	2	2	2	Typical	3	4	4	4
tr|G1SRH9|G1SRH9_RABIT	HNRNPR	Uncharacterized protein OS=Oryctolagus cuniculus (Rabbit) GN=HNRNPR PE=4 SV=1		Typical	9	22	3	3.74113	Typical	8	21	2	2.74113	Typical	10	20	4	4.62411	Typical	7	19	2	2.66312	Typical	6	21	1	1.78014	Typical	7	25	2	2.89716	Typical	9	26	4	4.85816	Typical	7	23	2	2.81915	Typical	8	23	2	2.81915
tr|G1SJW8|G1SJW8_RABIT	USP7	Ubiquitin carboxyl-terminal hydrolase OS=Oryctolagus cuniculus (Rabbit) GN=USP7 PE=4 SV=1		Typical	6	8	8	8	Typical	5	7	7	7	Typical	4	5	5	5	Typical	5	6	6	6	Typical	1	2	2	2	Typical	4	5	5	5	Typical	3	4	4	4	Typical	2	3	3	3	Typical	3	4	4	4
tr|G1TEW3|G1TEW3_RABIT	G3BP1 (InterPro)	Uncharacterized protein OS=Oryctolagus cuniculus (Rabbit) GN=LOC100353286 PE=4 SV=1		Typical	12	70	65	69.6164	Typical	12	78	72	77.5397	Typical	16	76	68	75.3863	Typical	15	85	80	84.6164	Typical	16	95	88	94.463	Typical	14	95	88	94.463	Typical	13	73	68	72.6164	Typical	15	82	76	81.5397	Typical	17	75	69	74.5397
tr|G1TMW2|G1TMW2_RABIT	TOLLIP	Uncharacterized protein OS=Oryctolagus cuniculus (Rabbit) GN=TOLLIP PE=4 SV=1		Typical	2	4	4	4	Typical	2	3	3	3	Typical	3	4	4	4	Typical	1	1	1	1	Typical	1	1	1	1	Typical	1	1	1	1	Typical	2	2	2	2	Typical	1	1	1	1	Typical	2	2	2	2
tr|G1TMD8|G1TMD8_RABIT	PPP5C	Serine/threonine-protein phosphatase OS=Oryctolagus cuniculus (Rabbit) GN=PPP5C PE=3 SV=1		Typical	2	3	3	3	Typical	3	4	4	4	Typical	3	4	4	4	Typical	1	1	1	1	Typical	1	1	1	1	Typical	1	2	2	2	Typical	3	3	3	3	Typical	1	1	1	1	Typical	1	1	1	1
tr|G1SIZ2|G1SIZ2_RABIT	RPS10 (InterPro)	Uncharacterized protein OS=Oryctolagus cuniculus (Rabbit) GN=LOC100354063 PE=1 SV=1		Typical	8	37	37	37	Typical	8	35	35	35	Typical	10	42	42	42	Typical	9	42	42	42	Typical	8	46	46	46	Typical	7	43	43	43	Typical	7	30	30	30	Typical	6	29	29	29	Typical	6	26	26	26
tr|G1TC48|G1TC48_RABIT	HNRNPUL1	Uncharacterized protein OS=Oryctolagus cuniculus (Rabbit) GN=HNRNPUL1 PE=4 SV=1		Typical	2	2	2	2	Typical	2	3	3	3	Typical	1	1	1	1		0	0	0	0		0	0	0	0		0	0	0	0	Typical	1	1	1	1		0	0	0	0	Typical	1	1	1	1
tr|G1TPG3|G1TPG3_RABIT	RPS13 (InterPro)	Uncharacterized protein OS=Oryctolagus cuniculus (Rabbit) GN=LOC100356144 PE=1 SV=1		Typical	16	62	62	62	Typical	18	69	69	69	Typical	16	67	67	67	Typical	18	99	99	99	Typical	18	99	99	99	Typical	19	91	91	91	Typical	17	65	65	65	Typical	18	70	70	70	Typical	18	68	68	68
tr|G1TX70|G1TX70_RABIT	RPL18 (InterPro)	Uncharacterized protein OS=Oryctolagus cuniculus (Rabbit) GN=RPL18 PE=4 SV=1		Typical	6	29	7	14.4381	Typical	7	34	9	17.4524	Typical	6	41	6	17.8333	Typical	7	61	10	27.2429	Typical	7	64	14	30.9048	Typical	6	40	7	18.1571	Typical	6	37	7	17.1429	Typical	4	34	5	14.8048	Typical	6	41	6	17.8333
tr|G1TA15|G1TA15_RABIT	LARS	Uncharacterized protein OS=Oryctolagus cuniculus (Rabbit) GN=LARS PE=3 SV=2		Typical	12	18	18	18	Typical	14	21	21	21	Typical	10	14	14	14	Typical	10	18	18	18	Typical	9	13	13	13	Typical	7	9	9	9	Typical	13	21	21	21	Typical	12	23	23	23	Typical	13	17	17	17
sp|P29338|IF4E_RABIT	EIF4E	Eukaryotic translation initiation factor 4E OS=Oryctolagus cuniculus (Rabbit) GN=EIF4E PE=1 SV=1		Typical	5	14	14	14	Typical	7	16	16	16	Typical	5	16	16	16	Typical	5	15	15	15	Typical	4	13	13	13	Typical	3	9	9	9	Typical	4	18	18	18	Typical	7	19	19	19	Typical	4	17	17	17
tr|G1SDN3|G1SDN3_RABIT	EIF1	Uncharacterized protein OS=Oryctolagus cuniculus (Rabbit) GN=EIF1 PE=4 SV=2			0	0	0	0		0	0	0	0		0	0	0	0		0	0	0	0		0	0	0	0		0	0	0	0	Typical	1	1	1	1		0	0	0	0		0	0	0	0
tr|G1SYB4|G1SYB4_RABIT	CDC42	Uncharacterized protein OS=Oryctolagus cuniculus (Rabbit) PE=3 SV=1			0	0	0	0		0	0	0	0		0	0	0	0		0	0	0	0		0	0	0	0		0	0	0	0		0	0	0	0		0	0	0	0	Typical	1	1	1	1
tr|G1T0D8|G1T0D8_RABIT	DTD1	D-tyrosyl-tRNA(Tyr) deacylase OS=Oryctolagus cuniculus (Rabbit) GN=DTD1 PE=3 SV=1			0	0	0	0		0	0	0	0		0	0	0	0		0	0	0	0		0	0	0	0		0	0	0	0		0	0	0	0		0	0	0	0	Typical	1	1	1	1
tr|G1SKK1|G1SKK1_RABIT	DUT	Uncharacterized protein OS=Oryctolagus cuniculus (Rabbit) GN=DUT PE=4 SV=2			0	0	0	0		0	0	0	0		0	0	0	0		0	0	0	0		0	0	0	0		0	0	0	0		0	0	0	0		0	0	0	0	Typical	1	1	1	1
tr|G1T7X6|G1T7X6_RABIT	LAMB1	Uncharacterized protein OS=Oryctolagus cuniculus (Rabbit) GN=LAMB1 PE=4 SV=2			0	0	0	0		0	0	0	0		0	0	0	0		0	0	0	0		0	0	0	0		0	0	0	0	Typical	1	1	1	1		0	0	0	0		0	0	0	0
tr|G1TRW8|G1TRW8_RABIT	LCN2	Uncharacterized protein OS=Oryctolagus cuniculus (Rabbit) GN=LCN2 PE=3 SV=1			0	0	0	0		0	0	0	0		0	0	0	0		0	0	0	0		0	0	0	0		0	0	0	0		0	0	0	0		0	0	0	0	Typical	1	1	1	1
tr|G1SKS8|G1SKS8_RABIT	MAP4	Microtubule-associated protein OS=Oryctolagus cuniculus (Rabbit) GN=MAP4 PE=4 SV=2			0	0	0	0		0	0	0	0		0	0	0	0		0	0	0	0		0	0	0	0		0	0	0	0	Typical	1	1	1	1		0	0	0	0		0	0	0	0
tr|G1SM50|G1SM50_RABIT	SF3B4	Uncharacterized protein OS=Oryctolagus cuniculus (Rabbit) GN=SF3B4 PE=4 SV=1			0	0	0	0	Typical	1	1	1	1	Typical	1	1	1	1	Typical	1	1	1	1	Typical	1	1	1	1		0	0	0	0	Typical	2	2	2	2	Typical	1	2	2	2	Typical	1	1	1	1
sp|P07466|DEF6_RABIT		Neutrophil antibiotic peptide NP-5 OS=Oryctolagus cuniculus (Rabbit) PE=1 SV=2			0	0	0	0		0	0	0	0		0	0	0	0		0	0	0	0		0	0	0	0		0	0	0	0	Typical	1	1	1	1		0	0	0	0		0	0	0	0
tr|G1T2L1|G1T2L1_RABIT	PSMA2	Proteasome subunit alpha type OS=Oryctolagus cuniculus (Rabbit) GN=PSMA2 PE=3 SV=1			0	0	0	0		0	0	0	0		0	0	0	0		0	0	0	0		0	0	0	0		0	0	0	0		0	0	0	0		0	0	0	0	Typical	1	1	1	1
tr|G1SDJ0|G1SDJ0_RABIT		Uncharacterized protein OS=Oryctolagus cuniculus (Rabbit) GN=HNRNPM PE=4 SV=1			0	0	0	0		0	0	0	0		0	0	0	0		0	0	0	0		0	0	0	0		0	0	0	0		0	0	0	0	Typical	1	1	1	1		0	0	0	0
tr|G1SYL8|G1SYL8_RABIT		Uncharacterized protein OS=Oryctolagus cuniculus (Rabbit) GN=TCEB2 PE=4 SV=2			0	0	0	0		0	0	0	0		0	0	0	0		0	0	0	0		0	0	0	0		0	0	0	0		0	0	0	0		0	0	0	0	Typical	1	1	1	1
tr|G1U410|G1U410_RABIT	TUBB4A	Uncharacterized protein OS=Oryctolagus cuniculus (Rabbit) GN=TUBB4A PE=3 SV=1			0	0	0	0		0	0	0	0		0	0	0	0		0	0	0	0		0	0	0	0		0	0	0	0		0	0	0	0		0	0	0	0	Typical	1	1	1	1
tr|G1SNS5|G1SNS5_RABIT		Uncharacterized protein OS=Oryctolagus cuniculus (Rabbit) PE=4 SV=1			0	0	0	0		0	0	0	0		0	0	0	0		0	0	0	0		0	0	0	0		0	0	0	0	Typical	1	1	1	1		0	0	0	0		0	0	0	0
tr|G1TCK9|G1TCK9_RABIT	IARS	Uncharacterized protein OS=Oryctolagus cuniculus (Rabbit) GN=IARS PE=3 SV=2			0	0	0	0		0	0	0	0		0	0	0	0		0	0	0	0		0	0	0	0		0	0	0	0		0	0	0	0	Typical	1	1	1	1		0	0	0	0
tr|G1TAP1|G1TAP1_RABIT	PPA1	Uncharacterized protein OS=Oryctolagus cuniculus (Rabbit) GN=PPA1 PE=4 SV=2			0	0	0	0		0	0	0	0		0	0	0	0		0	0	0	0		0	0	0	0		0	0	0	0		0	0	0	0		0	0	0	0	Typical	1	1	1	1
tr|G1TES6|G1TES6_RABIT	HSD17B10	Uncharacterized protein OS=Oryctolagus cuniculus (Rabbit) GN=HSD17B10 PE=3 SV=1			0	0	0	0		0	0	0	0		0	0	0	0		0	0	0	0		0	0	0	0		0	0	0	0	Typical	1	1	1	1		0	0	0	0		0	0	0	0
tr|G1T4S7|G1T4S7_RABIT	CWF19L1	Uncharacterized protein OS=Oryctolagus cuniculus (Rabbit) GN=CWF19L1 PE=4 SV=1			0	0	0	0		0	0	0	0		0	0	0	0		0	0	0	0		0	0	0	0		0	0	0	0		0	0	0	0		0	0	0	0	Typical	1	1	1	1
tr|G1T066|G1T066_RABIT	RFESD	Uncharacterized protein OS=Oryctolagus cuniculus (Rabbit) GN=RFESD PE=4 SV=1			0	0	0	0		0	0	0	0		0	0	0	0		0	0	0	0		0	0	0	0		0	0	0	0		0	0	0	0		0	0	0	0	Typical	1	1	1	1
sp|P11909|GPX1_RABIT	GPX1	Glutathione peroxidase 1 OS=Oryctolagus cuniculus (Rabbit) GN=GPX1 PE=2 SV=2			0	0	0	0		0	0	0	0		0	0	0	0		0	0	0	0		0	0	0	0		0	0	0	0		0	0	0	0		0	0	0	0	Typical	1	1	1	1
tr|G1TUG7|G1TUG7_RABIT	RPIA	Uncharacterized protein OS=Oryctolagus cuniculus (Rabbit) GN=RPIA PE=3 SV=1			0	0	0	0		0	0	0	0		0	0	0	0		0	0	0	0		0	0	0	0		0	0	0	0		0	0	0	0		0	0	0	0	Typical	1	1	1	1
tr|G1SI20|G1SI20_RABIT	IDH1	Isocitrate dehydrogenase [NADP] OS=Oryctolagus cuniculus (Rabbit) GN=IDH1 PE=3 SV=1			0	0	0	0		0	0	0	0		0	0	0	0		0	0	0	0		0	0	0	0		0	0	0	0	Typical	1	1	1	1		0	0	0	0		0	0	0	0
tr|G1SZ16|G1SZ16_RABIT	TXNRD2	Uncharacterized protein OS=Oryctolagus cuniculus (Rabbit) GN=TXNRD2 PE=3 SV=2			0	0	0	0		0	0	0	0		0	0	0	0		0	0	0	0		0	0	0	0		0	0	0	0		0	0	0	0		0	0	0	0	Typical	1	1	1	1
tr|G1SLQ4|G1SLQ4_RABIT	ACTR3	Uncharacterized protein OS=Oryctolagus cuniculus (Rabbit) GN=ARP3 PE=3 SV=1			0	0	0	0		0	0	0	0		0	0	0	0		0	0	0	0		0	0	0	0		0	0	0	0		0	0	0	0	Typical	1	1	1	1		0	0	0	0
tr|G1SH86|G1SH86_RABIT	TBCD	Uncharacterized protein OS=Oryctolagus cuniculus (Rabbit) GN=TBCD PE=4 SV=2			0	0	0	0		0	0	0	0		0	0	0	0		0	0	0	0		0	0	0	0		0	0	0	0		0	0	0	0		0	0	0	0	Typical	1	1	1	1
tr|G1SVH0|G1SVH0_RABIT	AHCY	Adenosylhomocysteinase OS=Oryctolagus cuniculus (Rabbit) GN=AHCY PE=3 SV=2			0	0	0	0		0	0	0	0		0	0	0	0		0	0	0	0		0	0	0	0		0	0	0	0		0	0	0	0		0	0	0	0	Typical	1	1	1	1
tr|G1T8Z0|G1T8Z0_RABIT	PRDX6				0	0	0	0		0	0	0	0		0	0	0	0		0	0	0	0		0	0	0	0		0	0	0	0		0	0	0	0		0	0	0	0	Typical	1	1	1	1
tr|G1T7Z0|G1T7Z0_RABIT	PGD	6-phosphogluconate dehydrogenase, decarboxylating OS=Oryctolagus cuniculus (Rabbit) GN=PGD PE=3 SV=2			0	0	0	0		0	0	0	0		0	0	0	0		0	0	0	0		0	0	0	0		0	0	0	0		0	0	0	0		0	0	0	0	Typical	1	1	1	1
tr|G1T3V3|G1T3V3_RABIT	RICTOR	Uncharacterized protein OS=Oryctolagus cuniculus (Rabbit) GN=RICTOR PE=4 SV=1			0	0	0	0		0	0	0	0		0	0	0	0		0	0	0	0		0	0	0	0		0	0	0	0	Typical	1	1	1	1		0	0	0	0		0	0	0	0
tr|G1SYS6|G1SYS6_RABIT	ACYP1	Acylphosphatase OS=Oryctolagus cuniculus (Rabbit) GN=ACYP1 PE=3 SV=1			0	0	0	0		0	0	0	0		0	0	0	0		0	0	0	0		0	0	0	0		0	0	0	0	Typical	1	1	1	1		0	0	0	0		0	0	0	0
tr|G1SZT1|G1SZT1_RABIT	RBKS	Uncharacterized protein OS=Oryctolagus cuniculus (Rabbit) GN=RBKS PE=3 SV=2			0	0	0	0		0	0	0	0		0	0	0	0		0	0	0	0		0	0	0	0		0	0	0	0		0	0	0	0	Typical	1	1	1	1		0	0	0	0
tr|G1SHS7|G1SHS7_RABIT	WDR1	Uncharacterized protein OS=Oryctolagus cuniculus (Rabbit) GN=WDR1 PE=4 SV=1			0	0	0	0		0	0	0	0		0	0	0	0		0	0	0	0		0	0	0	0		0	0	0	0		0	0	0	0		0	0	0	0	Typical	1	1	1	1
tr|A1BN59|A1BN59_RABIT		5'-nucleotidase OS=Oryctolagus cuniculus (Rabbit) PE=2 SV=1			0	0	0	0		0	0	0	0		0	0	0	0		0	0	0	0		0	0	0	0		0	0	0	0		0	0	0	0		0	0	0	0	Typical	1	1	1	1
sp|Q9N1E2|G6PI_RABIT	GPI	Glucose-6-phosphate isomerase OS=Oryctolagus cuniculus (Rabbit) GN=GPI PE=1 SV=3			0	0	0	0		0	0	0	0		0	0	0	0		0	0	0	0		0	0	0	0		0	0	0	0		0	0	0	0		0	0	0	0	Typical	1	1	1	1
sp|Q29504|UBA1_RABIT	UBA1 UBE1	Ubiquitin-like modifier-activating enzyme 1 OS=Oryctolagus cuniculus (Rabbit) GN=UBA1 PE=2 SV=1			0	0	0	0		0	0	0	0		0	0	0	0		0	0	0	0		0	0	0	0		0	0	0	0		0	0	0	0		0	0	0	0	Typical	1	1	1	1
sp|P12337|EST1_RABIT		Liver carboxylesterase 1 OS=Oryctolagus cuniculus (Rabbit) PE=1 SV=3			0	0	0	0		0	0	0	0		0	0	0	0		0	0	0	0		0	0	0	0		0	0	0	0	Typical	1	1	1	1		0	0	0	0		0	0	0	0
tr|G1T3Y3|G1T3Y3_RABIT	C20orf27	Uncharacterized protein OS=Oryctolagus cuniculus (Rabbit) GN=C20orf27 PE=4 SV=2			0	0	0	0		0	0	0	0		0	0	0	0		0	0	0	0		0	0	0	0		0	0	0	0		0	0	0	0	Typical	1	1	1	1		0	0	0	0
tr|G1SPK0|G1SPK0_RABIT	PEF1	Uncharacterized protein OS=Oryctolagus cuniculus (Rabbit) GN=PEF1 PE=4 SV=2			0	0	0	0		0	0	0	0		0	0	0	0		0	0	0	0		0	0	0	0		0	0	0	0	Typical	1	1	1	1		0	0	0	0		0	0	0	0
tr|G1SKX7|G1SKX7_RABIT	TRAF3IP3				0	0	0	0		0	0	0	0		0	0	0	0		0	0	0	0		0	0	0	0		0	0	0	0	Typical	1	1	1	1		0	0	0	0		0	0	0	0
tr|G1SVA1|G1SVA1_RABIT	XPO4				0	0	0	0		0	0	0	0		0	0	0	0		0	0	0	0		0	0	0	0		0	0	0	0		0	0	0	0		0	0	0	0	Typical	1	1	1	1
tr|G1SI29|G1SI29_RABIT	TUFM	Elongation factor Tu OS=Oryctolagus cuniculus (Rabbit) GN=TUFM PE=3 SV=1			0	0	0	0		0	0	0	0		0	0	0	0		0	0	0	0		0	0	0	0		0	0	0	0		0	0	0	0		0	0	0	0	Typical	1	1	1	1
tr|G1T442|G1T442_RABIT	GCLC	Uncharacterized protein OS=Oryctolagus cuniculus (Rabbit) GN=GCLC PE=4 SV=1			0	0	0	0		0	0	0	0		0	0	0	0		0	0	0	0		0	0	0	0		0	0	0	0		0	0	0	0		0	0	0	0	Typical	1	1	1	1
tr|G1SHF1|G1SHF1_RABIT	PFDN2	Uncharacterized protein OS=Oryctolagus cuniculus (Rabbit) GN=PFDN2 PE=4 SV=1			0	0	0	0		0	0	0	0		0	0	0	0		0	0	0	0		0	0	0	0		0	0	0	0		0	0	0	0		0	0	0	0	Typical	1	1	1	1
tr|G1TEG8|G1TEG8_RABIT	PDCD6IP	Uncharacterized protein OS=Oryctolagus cuniculus (Rabbit) GN=PDCD6IP PE=4 SV=1			0	0	0	0		0	0	0	0		0	0	0	0		0	0	0	0		0	0	0	0		0	0	0	0		0	0	0	0		0	0	0	0	Typical	1	1	1	1
tr|G1SR61|G1SR61_RABIT	DHX30	Uncharacterized protein OS=Oryctolagus cuniculus (Rabbit) GN=DHX30 PE=4 SV=1		Typical	5	7	7	7	Typical	6	9	9	9	Typical	4	6	6	6	Typical	5	7	7	7	Typical	6	9	9	9	Typical	3	4	4	4	Typical	5	6	6	6	Typical	3	5	5	5	Typical	2	2	2	2
tr|G1SF08|G1SF08_RABIT	RPL35A	Uncharacterized protein OS=Oryctolagus cuniculus (Rabbit) GN=RPL35A PE=1 SV=1		Typical	7	12	12	12	Typical	8	19	19	19	Typical	7	16	16	16	Typical	8	19	19	19	Typical	9	29	29	29	Typical	7	21	21	21	Typical	8	20	20	20	Typical	8	14	14	14	Typical	8	21	21	21
tr|G1TN20|G1TN20_RABIT	AQP1	Uncharacterized protein OS=Oryctolagus cuniculus (Rabbit) GN=AQP1 PE=3 SV=2		Typical	1	2	2	2	Typical	1	1	1	1	Typical	1	1	1	1	Typical	1	2	2	2	Typical	1	1	1	1		0	0	0	0	Typical	1	1	1	1		0	0	0	0		0	0	0	0
tr|G1TAE4|G1TAE4_RABIT	DCAF7	Uncharacterized protein OS=Oryctolagus cuniculus (Rabbit) GN=DCAF7 PE=4 SV=1		Typical	2	2	2	2	Typical	1	1	1	1	Typical	1	1	1	1	Typical	1	1	1	1	Typical	2	2	2	2		0	0	0	0	Typical	1	1	1	1		0	0	0	0		0	0	0	0
tr|G1SZ44|G1SZ44_RABIT	HSPE1	Uncharacterized protein OS=Oryctolagus cuniculus (Rabbit) GN=HSPE1 PE=3 SV=1			0	0	0	0	Typical	1	1	1	1	Typical	1	1	1	1	Typical	2	2	2	2	Typical	1	1	1	1		0	0	0	0		0	0	0	0	Typical	1	2	2	2	Typical	2	3	3	3
tr|G1STX4|G1STX4_RABIT	SRP54	Uncharacterized protein OS=Oryctolagus cuniculus (Rabbit) GN=SRP54 PE=3 SV=1		Typical	4	9	9	9	Typical	6	10	10	10	Typical	7	13	13	13	Typical	5	6	6	6	Typical	6	9	9	9	Typical	5	9	9	9	Typical	7	11	11	11	Typical	3	5	5	5	Typical	3	4	4	4
tr|G1TAK0|G1TAK0_RABIT	PRRC2C	Uncharacterized protein OS=Oryctolagus cuniculus (Rabbit) GN=PRRC2C PE=4 SV=1		Typical	5	8	8	8	Typical	4	4	3	3.41958	Typical	5	5	5	5	Typical	7	10	10	10	Typical	5	8	8	8	Typical	3	3	3	3	Typical	8	9	9	9	Typical	7	9	9	9	Typical	4	5	5	5
tr|G1SGB5|G1SGB5_RABIT	SFPQ	Uncharacterized protein OS=Oryctolagus cuniculus (Rabbit) GN=SFPQ PE=4 SV=1		Typical	2	2	2	2	Typical	1	1	1	1	Typical	1	1	1	1		0	0	0	0		0	0	0	0	Typical	1	1	1	1	Typical	1	1	1	1		0	0	0	0		0	0	0	0
tr|G1SRE6|G1SRE6_RABIT	EPB41	Uncharacterized protein OS=Oryctolagus cuniculus (Rabbit) GN=EPB41 PE=4 SV=2		Typical	1	1	1	1	Typical	2	2	2	2	Typical	1	1	1	1		0	0	0	0		0	0	0	0	Typical	1	1	1	1		0	0	0	0		0	0	0	0	Typical	1	1	1	1
tr|G1SPT2|G1SPT2_RABIT	DDX6	Uncharacterized protein OS=Oryctolagus cuniculus (Rabbit) GN=DDX6 PE=3 SV=1			0	0	0	0		0	0	0	0		0	0	0	0		0	0	0	0	Typical	1	1	1	1		0	0	0	0	Typical	1	1	1	1		0	0	0	0		0	0	0	0
tr|G1SZ14|G1SZ14_RABIT	PSMA3	Uncharacterized protein OS=Oryctolagus cuniculus (Rabbit) GN=PSMA3 PE=4 SV=2			0	0	0	0		0	0	0	0		0	0	0	0		0	0	0	0	Typical	1	1	1	1		0	0	0	0		0	0	0	0		0	0	0	0	Typical	1	1	1	1
tr|G1T2G6|G1T2G6_RABIT	DIP2B	Uncharacterized protein OS=Oryctolagus cuniculus (Rabbit) GN=DIP2B PE=4 SV=2			0	0	0	0		0	0	0	0		0	0	0	0		0	0	0	0		0	0	0	0	Typical	1	1	1	1	Typical	1	1	1	1		0	0	0	0		0	0	0	0
tr|G1SVT4|G1SVT4_RABIT	PSMD7	Uncharacterized protein OS=Oryctolagus cuniculus (Rabbit) GN=PSMD7 PE=4 SV=2			0	0	0	0		0	0	0	0		0	0	0	0		0	0	0	0	Typical	1	1	1	1		0	0	0	0		0	0	0	0	Typical	1	1	1	1		0	0	0	0
tr|G1TU13|G1TU13_RABIT	RPS17	Uncharacterized protein OS=Oryctolagus cuniculus (Rabbit) GN=RPS17 PE=1 SV=1		Typical	13	83	83	83	Typical	14	86	86	86	Typical	15	80	80	80	Typical	14	82	82	82	Typical	15	81	81	81	Typical	14	120	120	120	Typical	11	70	70	70	Typical	12	64	64	64	Typical	11	66	66	66
tr|G1SHQ2|G1SHQ2_RABIT	RPL21 (InterPro)	Uncharacterized protein OS=Oryctolagus cuniculus (Rabbit) GN=RPL21 PE=1 SV=1		Typical	10	42	42	42	Typical	9	40	40	40	Typical	10	45	45	45	Typical	11	58	58	58	Typical	8	62	62	62	Typical	9	67	67	67	Typical	9	41	41	41	Typical	8	46	46	46	Typical	9	47	47	47
tr|B7NZP3|B7NZP3_RABIT	ARD1A	N-acetyltransferase ARD1 (Predicted) OS=Oryctolagus cuniculus (Rabbit) GN=ARD1A PE=4 SV=1		Typical	5	11	11	11	Typical	4	11	11	11	Typical	3	8	8	8	Typical	3	13	13	13	Typical	3	10	10	10	Typical	3	11	11	11	Typical	3	8	8	8	Typical	2	5	5	5	Typical	2	6	6	6
tr|G1SSW2|G1SSW2_RABIT	STK26	Uncharacterized protein OS=Oryctolagus cuniculus (Rabbit) GN=LOC100343602 PE=4 SV=1		Typical	2	2	0	1.55556	Typical	4	5	1	4.11111	Typical	4	5	2	4.33333	Typical	2	3	2	2.77778	Typical	1	2	0	1.55556		0	0	0	0	Typical	1	1	1	1	Typical	2	4	1	3.33333	Typical	1	1	0	0.777778
tr|G1T4P7|G1T4P7_RABIT	TLN2	Uncharacterized protein OS=Oryctolagus cuniculus (Rabbit) GN=TLN2 PE=4 SV=1		Typical	3	6	6	6	Typical	3	4	4	4	Typical	2	2	2	2	Typical	2	3	3	3	Typical	2	3	3	3	Subset	1	1	0	0.180451	Typical	2	3	3	3	Typical	1	2	2	2	Typical	1	1	1	1
tr|G1SCJ6|G1SCJ6_RABIT	RPL22 (InterPro)	Uncharacterized protein OS=Oryctolagus cuniculus (Rabbit) GN=RPL17 PE=3 SV=1		Typical	12	90	26	88.3268	Typical	12	102	29	100.092	Typical	12	102	28	100.065	Typical	13	149	53	146.49	Typical	13	158	61	155.464	Typical	11	101	26	99.0392	Typical	11	80	26	78.5882	Typical	13	81	25	79.536	Typical	13	79	24	77.5621
tr|G1SHZ8|G1SHZ8_RABIT	CCT8	Uncharacterized protein OS=Oryctolagus cuniculus (Rabbit) GN=CCT8 PE=3 SV=2		Typical	9	11	11	11	Typical	21	31	31	31	Typical	17	30	30	30	Typical	12	16	16	16	Typical	9	14	14	14	Typical	5	9	9	9	Typical	17	28	28	28	Typical	15	32	32	32	Typical	15	22	22	22
tr|G1SLZ9|G1SLZ9_RABIT	EIF4E2	Uncharacterized protein OS=Oryctolagus cuniculus (Rabbit) GN=EIF4E2 PE=3 SV=1		Typical	1	1	1	1		0	0	0	0		0	0	0	0	Typical	1	1	1	1	Typical	1	2	2	2	Typical	1	1	1	1		0	0	0	0		0	0	0	0		0	0	0	0
tr|G1T9L2|G1T9L2_RABIT	VPS36	Uncharacterized protein OS=Oryctolagus cuniculus (Rabbit) GN=VPS36 PE=4 SV=1		Typical	1	1	1	1		0	0	0	0		0	0	0	0		0	0	0	0		0	0	0	0		0	0	0	0	Typical	2	2	2	2	Typical	1	1	1	1		0	0	0	0
tr|G1U7S4|G1U7S4_RABIT	PGAM2	Uncharacterized protein OS=Oryctolagus cuniculus (Rabbit) GN=PGAM2 PE=3 SV=1		Typical	1	1	1	1		0	0	0	0		0	0	0	0		0	0	0	0		0	0	0	0		0	0	0	0	Sameset	1	1	0	0.666667		0	0	0	0	Typical	2	2	1	1.66667
tr|A5HC45|A5HC45_RABIT		Cathepsin D OS=Oryctolagus cuniculus (Rabbit) PE=2 SV=1		Sameset	1	1	1	1		0	0	0	0		0	0	0	0		0	0	0	0		0	0	0	0		0	0	0	0	Typical	2	2	2	2		0	0	0	0	Typical	1	1	1	1
tr|G1T1L4|G1T1L4_RABIT	GRWD1	Uncharacterized protein OS=Oryctolagus cuniculus (Rabbit) GN=GRWD1 PE=4 SV=1			0	0	0	0		0	0	0	0	Typical	1	1	1	1		0	0	0	0		0	0	0	0		0	0	0	0	Typical	1	1	1	1	Typical	1	1	1	1	Typical	1	1	1	1
tr|G1SWI7|G1SWI7_RABIT	PSMA8	Proteasome subunit alpha type OS=Oryctolagus cuniculus (Rabbit) GN=PSMA8 PE=3 SV=2			0	0	0	0		0	0	0	0	Typical	1	1	1	1		0	0	0	0		0	0	0	0		0	0	0	0		0	0	0	0	Typical	1	2	2	2	Typical	1	1	1	1
tr|G1SV05|G1SV05_RABIT	HSPA4	Uncharacterized protein OS=Oryctolagus cuniculus (Rabbit) GN=HSPA4 PE=3 SV=2			0	0	0	0	Typical	1	1	1	1		0	0	0	0		0	0	0	0		0	0	0	0		0	0	0	0		0	0	0	0		0	0	0	0	Typical	3	3	3	3
tr|G1T705|G1T705_RABIT	CYB5R3	Uncharacterized protein OS=Oryctolagus cuniculus (Rabbit) GN=CYB5R3 PE=4 SV=1			0	0	0	0		0	0	0	0	Typical	1	1	1	1		0	0	0	0		0	0	0	0		0	0	0	0	Typical	1	1	1	1	Typical	1	1	1	1	Typical	1	1	1	1
tr|G1TDU8|G1TDU8_RABIT	ZNF622	Uncharacterized protein OS=Oryctolagus cuniculus (Rabbit) GN=ZNF622 PE=4 SV=2			0	0	0	0	Typical	1	1	1	1		0	0	0	0	Typical	1	1	1	1	Typical	2	2	2	2		0	0	0	0		0	0	0	0		0	0	0	0		0	0	0	0
sp|P40826|UBP14_RABIT	USP14 TGT	Ubiquitin carboxyl-terminal hydrolase 14 OS=Oryctolagus cuniculus (Rabbit) GN=USP14 PE=1 SV=3		Typical	3	3	3	3	Typical	4	6	6	6	Typical	4	4	4	4	Typical	5	5	5	5		0	0	0	0	Typical	2	3	3	3	Typical	1	1	1	1	Typical	8	10	10	10	Typical	5	7	7	7
tr|G1SCI7|G1SCI7_RABIT	CBLN4				0	0	0	0	Typical	1	1	1	1		0	0	0	0	Typical	1	1	1	1		0	0	0	0	Typical	1	1	1	1		0	0	0	0		0	0	0	0		0	0	0	0
tr|G1SMZ5|G1SMZ5_RABIT	EIF3A	Eukaryotic translation initiation factor 3 subunit A OS=Oryctolagus cuniculus (Rabbit) GN=EIF3A PE=1 SV=2		Typical	47	106	106	106	Typical	35	79	79	79	Typical	34	78	78	78	Typical	33	83	83	83	Typical	37	89	89	89	Typical	30	76	76	76	Typical	35	80	80	80	Typical	30	67	67	67	Typical	29	58	58	58
tr|G1SJC7|G1SJC7_RABIT	G3BP2	Uncharacterized protein OS=Oryctolagus cuniculus (Rabbit) GN=G3BP2 PE=4 SV=1		Typical	6	14	9	9.38356	Typical	5	12	6	6.46027	Typical	6	15	7	7.6137	Typical	6	14	9	9.38356	Typical	4	12	5	5.53699	Typical	5	16	9	9.53698	Typical	4	10	5	5.38356	Typical	4	9	3	3.46027	Typical	4	9	3	3.46027
tr|G1TAW7|G1TAW7_RABIT	EIF2A	Eukaryotic translation initiation factor 2 subunit 1 OS=Oryctolagus cuniculus (Rabbit) GN=EIF2A PE=4 SV=1		Typical	20	56	54	55.9951	Typical	19	45	42	44.9926	Typical	20	46	42	45.9902	Typical	16	50	45	49.9877	Typical	12	38	36	37.9951	Typical	16	42	41	41.9975	Typical	18	59	57	58.9951	Typical	18	53	51	52.9951	Typical	15	42	39	41.9926
sp|Q28740|BASI_RABIT	BSG	Basigin OS=Oryctolagus cuniculus (Rabbit) GN=BSG PE=2 SV=1		Typical	1	1	1	1		0	0	0	0		0	0	0	0		0	0	0	0	Typical	1	1	1	1		0	0	0	0		0	0	0	0		0	0	0	0		0	0	0	0
tr|G1T8S7|G1T8S7_RABIT	SYPL1	Uncharacterized protein OS=Oryctolagus cuniculus (Rabbit) GN=SYPL1 PE=4 SV=2		Typical	1	1	1	1		0	0	0	0		0	0	0	0		0	0	0	0	Typical	1	1	1	1		0	0	0	0		0	0	0	0		0	0	0	0		0	0	0	0
tr|G1SR29|G1SR29_RABIT	ATP6V1A	Uncharacterized protein OS=Oryctolagus cuniculus (Rabbit) GN=ATP6V1A PE=3 SV=2			0	0	0	0	Typical	1	1	1	1		0	0	0	0	Typical	1	1	1	1		0	0	0	0		0	0	0	0		0	0	0	0		0	0	0	0		0	0	0	0
tr|G1TBL0|G1TBL0_RABIT	BZW2	Uncharacterized protein OS=Oryctolagus cuniculus (Rabbit) GN=BZW2 PE=4 SV=2			0	0	0	0	Typical	1	1	1	1		0	0	0	0		0	0	0	0		0	0	0	0	Typical	1	1	1	1		0	0	0	0		0	0	0	0		0	0	0	0
sp|P16973|LYSC_RABIT	LYZ	Lysozyme C OS=Oryctolagus cuniculus (Rabbit) GN=LYZ PE=1 SV=1		Typical	1	1	1	1		0	0	0	0		0	0	0	0	Typical	1	1	1	1		0	0	0	0		0	0	0	0		0	0	0	0	Typical	2	2	2	2	Typical	1	1	1	1
tr|G1TSH8|G1TSH8_RABIT	CSD (InterPro)	Nuclease-sensitive element-binding protein 1 OS=Oryctolagus cuniculus (Rabbit) GN=YBX1 PE=4 SV=1		Typical	9	58	4	35.2188	Typical	9	51	5	31.5938	Typical	10	54	4	32.9062	Typical	8	42	5	26.3906	Typical	8	49	7	31.2812	Typical	9	60	4	36.375	Typical	9	64	5	39.1094	Typical	9	56	2	33.2188	Typical	9	48	1	28.1719
tr|G1SUV5|G1SUV5_RABIT	HSP90 (Interpro)	Uncharacterized protein OS=Oryctolagus cuniculus (Rabbit) GN=HSP90AB1 PE=3 SV=1		Typical	7	15	0	0	Typical	8	12	0	0	Typical	6	9	0	0	Typical	5	6	0	0	Typical	5	11	0	0	Typical	5	15	0	0	Typical	4	6	0	0	Typical	4	9	0	0	Typical	5	9	0	0
tr|G1TVD5|G1TVD5_RABIT		Uncharacterized protein OS=Oryctolagus cuniculus (Rabbit) PE=3 SV=1		Subset	2	4	0	0.0280992	Subset	4	5	0	0.138095	Typical	3	6	1	1.03034	Subset	3	4	0	0.129474	Subset	3	6	0	0.0864528	Subset	3	5	0	0.0842157	Subset	4	7	0	0.202832	Subset	4	6	0	0.140332	Subset	4	7	0	0.148953
tr|G1SRF7|G1SRF7_RABIT	HSPA9	Uncharacterized protein OS=Oryctolagus cuniculus (Rabbit) GN=HSPA9 PE=3 SV=1		Typical	3	4	4	4	Typical	2	2	2	2	Typical	1	1	1	1	Typical	1	1	1	1	Typical	2	3	1	1.01166	Typical	1	1	1	1	Typical	1	1	1	1	Typical	2	2	1	1.00583		0	0	0	0
tr|G1SY68|G1SY68_RABIT	SF3B2	Uncharacterized protein OS=Oryctolagus cuniculus (Rabbit) GN=SF3B2 PE=4 SV=2		Typical	3	3	3	3		0	0	0	0	Typical	4	4	4	4	Typical	2	2	2	2	Typical	1	1	1	1	Typical	2	2	2	2	Typical	2	3	3	3		0	0	0	0		0	0	0	0
sp|O97572|RAB7A_RABIT	RAB7A RAB7	Ras-related protein Rab-7a OS=Oryctolagus cuniculus (Rabbit) GN=RAB7A PE=2 SV=1		Typical	3	3	3	3	Typical	1	1	1	1	Typical	2	2	2	2	Typical	2	3	3	3	Typical	2	3	3	3	Typical	2	2	2	2	Typical	3	4	4	4	Typical	3	4	4	4	Typical	2	2	2	2
tr|G1TMU2|G1TMU2_RABIT	HNRNPF	Uncharacterized protein OS=Oryctolagus cuniculus (Rabbit) GN=HNRNPF PE=4 SV=1			0	0	0	0	Typical	1	1	1	1		0	0	0	0		0	0	0	0	Typical	2	2	2	2		0	0	0	0	Typical	1	2	2	2		0	0	0	0	Typical	1	1	1	1
tr|G1U1H2|G1U1H2_RABIT	LOC100349535	Uncharacterized protein OS=Oryctolagus cuniculus (Rabbit) GN=LOC100349535 PE=4 SV=1			0	0	0	0	Typical	1	1	1	1		0	0	0	0	Subset	1	1	0	0.444444	Subset	1	1	0	0.444444		0	0	0	0	Typical	1	1	1	1	Typical	1	1	1	1	Typical	1	1	1	1
tr|G1T369|G1T369_RABIT	DCUN1D1	DCN1-like protein OS=Oryctolagus cuniculus (Rabbit) GN=DCUN1D1 PE=4 SV=1			0	0	0	0	Typical	1	1	1	1		0	0	0	0	Typical	1	1	1	1	Typical	1	1	1	1		0	0	0	0		0	0	0	0	Typical	1	1	1	1	Typical	1	2	2	2
tr|G1TX03|G1TX03_RABIT	RBM8A	RNA-binding protein 8A OS=Oryctolagus cuniculus (Rabbit) GN=RBM8A PE=3 SV=1		Typical	2	7	7	7	Typical	1	5	5	5	Typical	1	4	4	4	Typical	1	3	3	3	Typical	1	4	4	4	Typical	1	4	4	4	Typical	1	3	3	3	Typical	1	4	4	4	Typical	1	2	2	2
tr|G1SHK7|G1SHK7_RABIT	LAMTOR5	Uncharacterized protein OS=Oryctolagus cuniculus (Rabbit) GN=LAMTOR5 PE=4 SV=1		Typical	2	2	2	2	Typical	2	3	3	3	Typical	1	2	2	2	Typical	2	3	3	3		0	0	0	0	Typical	1	1	1	1	Typical	1	1	1	1	Typical	1	2	2	2		0	0	0	0
sp|O18998|DNAS1_RABIT	DNASE1 DNL1			Typical	1	4	4	4	Typical	1	4	4	4	Typical	1	4	4	4	Typical	1	6	6	6	Typical	1	7	7	7	Typical	1	6	6	6	Typical	1	6	6	6	Typical	1	5	5	5	Typical	1	6	6	6
tr|G1U4N1|G1U4N1_RABIT	RPS6KA1	Ribosomal protein S6 kinase OS=Oryctolagus cuniculus (Rabbit) GN=RPS6KA1 PE=3 SV=2		Typical	1	1	1	1		0	0	0	0		0	0	0	0		0	0	0	0		0	0	0	0		0	0	0	0		0	0	0	0		0	0	0	0		0	0	0	0
tr|G1T0B8|G1T0B8_RABIT	TUT7	Uncharacterized protein OS=Oryctolagus cuniculus (Rabbit) GN=ZCCHC6 PE=4 SV=2		Typical	1	1	1	1		0	0	0	0		0	0	0	0		0	0	0	0		0	0	0	0		0	0	0	0		0	0	0	0		0	0	0	0		0	0	0	0
tr|G1SFP5|G1SFP5_RABIT	MAPKAP1	Uncharacterized protein OS=Oryctolagus cuniculus (Rabbit) GN=MAPKAP1 PE=4 SV=1		Typical	1	1	1	1		0	0	0	0		0	0	0	0		0	0	0	0		0	0	0	0		0	0	0	0		0	0	0	0		0	0	0	0		0	0	0	0
tr|G1TBF8|G1TBF8_RABIT	CIT	Uncharacterized protein OS=Oryctolagus cuniculus (Rabbit) GN=CIT PE=4 SV=1		Typical	1	1	1	1		0	0	0	0		0	0	0	0		0	0	0	0		0	0	0	0		0	0	0	0		0	0	0	0		0	0	0	0		0	0	0	0
tr|G1SS33|G1SS33_RABIT	ATP6V1E1	Uncharacterized protein OS=Oryctolagus cuniculus (Rabbit) GN=ATP6V1E1 PE=3 SV=1		Typical	1	1	1	1		0	0	0	0		0	0	0	0		0	0	0	0		0	0	0	0		0	0	0	0		0	0	0	0		0	0	0	0		0	0	0	0
tr|G1T3M3|G1T3M3_RABIT	RAB21	Uncharacterized protein OS=Oryctolagus cuniculus (Rabbit) GN=RAB21 PE=3 SV=2		Typical	1	1	1	1		0	0	0	0		0	0	0	0		0	0	0	0		0	0	0	0		0	0	0	0		0	0	0	0		0	0	0	0		0	0	0	0
tr|G1T7P8|G1T7P8_RABIT	CNOT7	Uncharacterized protein OS=Oryctolagus cuniculus (Rabbit) GN=LOC100351543 PE=4 SV=1		Typical	1	1	1	1		0	0	0	0		0	0	0	0		0	0	0	0		0	0	0	0		0	0	0	0		0	0	0	0		0	0	0	0		0	0	0	0
tr|G1TTU6|G1TTU6_RABIT	SKP1	Uncharacterized protein OS=Oryctolagus cuniculus (Rabbit) GN=SKP1 PE=4 SV=1		Typical	1	1	1	1		0	0	0	0		0	0	0	0		0	0	0	0		0	0	0	0		0	0	0	0		0	0	0	0		0	0	0	0		0	0	0	0
tr|G1TGY9|G1TGY9_RABIT	VPS11	Uncharacterized protein OS=Oryctolagus cuniculus (Rabbit) GN=VPS11 PE=4 SV=2		Typical	1	1	1	1		0	0	0	0		0	0	0	0		0	0	0	0		0	0	0	0		0	0	0	0		0	0	0	0		0	0	0	0		0	0	0	0
tr|G1TEU6|G1TEU6_RABIT	UBR2	Uncharacterized protein OS=Oryctolagus cuniculus (Rabbit) GN=UBR2 PE=4 SV=1		Typical	1	1	1	1		0	0	0	0		0	0	0	0		0	0	0	0		0	0	0	0		0	0	0	0		0	0	0	0		0	0	0	0		0	0	0	0
tr|G1TFB5|G1TFB5_RABIT	RAB18	Uncharacterized protein OS=Oryctolagus cuniculus (Rabbit) GN=RAB18 PE=3 SV=1		Typical	1	1	1	1		0	0	0	0		0	0	0	0		0	0	0	0		0	0	0	0		0	0	0	0		0	0	0	0		0	0	0	0		0	0	0	0
tr|G1T6S4|G1T6S4_RABIT	DST	Uncharacterized protein OS=Oryctolagus cuniculus (Rabbit) GN=DST PE=4 SV=2		Typical	1	1	1	1		0	0	0	0		0	0	0	0		0	0	0	0		0	0	0	0		0	0	0	0		0	0	0	0		0	0	0	0		0	0	0	0
tr|G1SCG5|G1SCG5_RABIT	ELP3	Uncharacterized protein OS=Oryctolagus cuniculus (Rabbit) GN=ELP3 PE=4 SV=2		Typical	1	1	1	1		0	0	0	0		0	0	0	0		0	0	0	0		0	0	0	0		0	0	0	0		0	0	0	0		0	0	0	0		0	0	0	0
tr|G1SQI0|G1SQI0_RABIT	FUBP3	Uncharacterized protein OS=Oryctolagus cuniculus (Rabbit) GN=FUBP3 PE=4 SV=2			0	0	0	0		0	0	0	0	Typical	1	1	1	1		0	0	0	0		0	0	0	0		0	0	0	0		0	0	0	0		0	0	0	0		0	0	0	0
tr|G1SLL1|G1SLL1_RABIT	TJP1	Uncharacterized protein OS=Oryctolagus cuniculus (Rabbit) GN=TJP1 PE=4 SV=1			0	0	0	0	Typical	1	1	1	1		0	0	0	0		0	0	0	0		0	0	0	0		0	0	0	0		0	0	0	0		0	0	0	0		0	0	0	0
tr|G1T286|G1T286_RABIT	VPS29	Vacuolar protein sorting-associated protein 29 OS=Oryctolagus cuniculus (Rabbit) GN=VPS29 PE=3 SV=1			0	0	0	0	Typical	1	1	1	1		0	0	0	0		0	0	0	0		0	0	0	0		0	0	0	0		0	0	0	0		0	0	0	0		0	0	0	0
tr|G1SZR6|G1SZR6_RABIT	CUL3	Uncharacterized protein OS=Oryctolagus cuniculus (Rabbit) GN=CUL3 PE=3 SV=2			0	0	0	0	Typical	1	1	1	1		0	0	0	0		0	0	0	0		0	0	0	0		0	0	0	0		0	0	0	0		0	0	0	0		0	0	0	0
tr|G1T271|G1T271_RABIT	EXOSC1	Uncharacterized protein OS=Oryctolagus cuniculus (Rabbit) GN=EXOSC1 PE=4 SV=1			0	0	0	0		0	0	0	0	Typical	1	1	1	1		0	0	0	0		0	0	0	0		0	0	0	0		0	0	0	0		0	0	0	0		0	0	0	0
tr|G1TAQ7|G1TAQ7_RABIT		Uncharacterized protein OS=Oryctolagus cuniculus (Rabbit) PE=4 SV=1			0	0	0	0	Typical	1	1	1	1		0	0	0	0		0	0	0	0		0	0	0	0		0	0	0	0		0	0	0	0		0	0	0	0		0	0	0	0
tr|G1SED7|G1SED7_RABIT	EXOSC7	Uncharacterized protein OS=Oryctolagus cuniculus (Rabbit) GN=EXOSC7 PE=4 SV=1			0	0	0	0	Typical	1	1	1	1		0	0	0	0		0	0	0	0		0	0	0	0		0	0	0	0		0	0	0	0		0	0	0	0		0	0	0	0
tr|G1SYU2|G1SYU2_RABIT	DNAJC2	Uncharacterized protein OS=Oryctolagus cuniculus (Rabbit) GN=DNAJC2 PE=4 SV=1			0	0	0	0		0	0	0	0	Typical	1	1	1	1		0	0	0	0		0	0	0	0		0	0	0	0		0	0	0	0		0	0	0	0		0	0	0	0
tr|G1SU30|G1SU30_RABIT	BAG6	Uncharacterized protein OS=Oryctolagus cuniculus (Rabbit) GN=BAG6 PE=4 SV=1			0	0	0	0	Typical	1	1	1	1		0	0	0	0		0	0	0	0		0	0	0	0		0	0	0	0		0	0	0	0		0	0	0	0		0	0	0	0
tr|G1STM4|G1STM4_RABIT	THTPA	Uncharacterized protein OS=Oryctolagus cuniculus (Rabbit) GN=THTPA PE=4 SV=1			0	0	0	0		0	0	0	0	Typical	1	1	1	1		0	0	0	0		0	0	0	0		0	0	0	0		0	0	0	0		0	0	0	0		0	0	0	0
tr|G1T6C1|G1T6C1_RABIT	DERA	Uncharacterized protein OS=Oryctolagus cuniculus (Rabbit) GN=DERA PE=4 SV=2			0	0	0	0	Typical	1	1	1	1		0	0	0	0		0	0	0	0		0	0	0	0		0	0	0	0		0	0	0	0		0	0	0	0		0	0	0	0
tr|G1TDV9|G1TDV9_RABIT	CCDC43	Uncharacterized protein OS=Oryctolagus cuniculus (Rabbit) GN=CCDC43 PE=4 SV=2			0	0	0	0	Typical	1	1	1	1		0	0	0	0		0	0	0	0		0	0	0	0		0	0	0	0		0	0	0	0		0	0	0	0		0	0	0	0
tr|G1TRX7|G1TRX7_RABIT	DGKA	Diacylglycerol kinase OS=Oryctolagus cuniculus (Rabbit) GN=DGKA PE=3 SV=2			0	0	0	0	Typical	1	1	1	1		0	0	0	0		0	0	0	0		0	0	0	0		0	0	0	0		0	0	0	0		0	0	0	0		0	0	0	0
tr|G1TKL0|G1TKL0_RABIT	SNRPA	Uncharacterized protein OS=Oryctolagus cuniculus (Rabbit) GN=SNRPA PE=4 SV=1			0	0	0	0	Typical	1	1	1	1		0	0	0	0		0	0	0	0		0	0	0	0		0	0	0	0		0	0	0	0		0	0	0	0		0	0	0	0
tr|G1SVP9|G1SVP9_RABIT	PABPN1	Uncharacterized protein OS=Oryctolagus cuniculus (Rabbit) GN=PABPN1 PE=4 SV=1			0	0	0	0	Typical	1	1	1	1		0	0	0	0		0	0	0	0		0	0	0	0		0	0	0	0		0	0	0	0		0	0	0	0		0	0	0	0
tr|G1U1U7|G1U1U7_RABIT	SYT11	Uncharacterized protein OS=Oryctolagus cuniculus (Rabbit) GN=SYT11 PE=4 SV=1			0	0	0	0		0	0	0	0	Typical	1	1	1	1		0	0	0	0		0	0	0	0		0	0	0	0		0	0	0	0		0	0	0	0		0	0	0	0
tr|G1T7I3|G1T7I3_RABIT	ACACA	Uncharacterized protein OS=Oryctolagus cuniculus (Rabbit) GN=ACACA PE=4 SV=2			0	0	0	0	Typical	1	1	1	1		0	0	0	0		0	0	0	0		0	0	0	0		0	0	0	0		0	0	0	0		0	0	0	0		0	0	0	0
tr|G1TRG8|G1TRG8_RABIT	GNAI2	Uncharacterized protein OS=Oryctolagus cuniculus (Rabbit) GN=GNAI2 PE=4 SV=1			0	0	0	0	Typical	1	1	1	1		0	0	0	0		0	0	0	0		0	0	0	0		0	0	0	0		0	0	0	0		0	0	0	0		0	0	0	0
tr|G1SCE5|G1SCE5_RABIT	LOC100342857	NAD(P)(+)--arginine ADP-ribosyltransferase OS=Oryctolagus cuniculus (Rabbit) GN=LOC100342857 PE=3 SV=2			0	0	0	0		0	0	0	0	Typical	1	1	1	1		0	0	0	0		0	0	0	0		0	0	0	0		0	0	0	0		0	0	0	0		0	0	0	0
tr|G1T4N5|G1T4N5_RABIT	MTOR	Uncharacterized protein OS=Oryctolagus cuniculus (Rabbit) GN=MTOR PE=4 SV=2			0	0	0	0	Typical	1	1	1	1		0	0	0	0		0	0	0	0		0	0	0	0		0	0	0	0		0	0	0	0		0	0	0	0		0	0	0	0
tr|G1TKR7|G1TKR7_RABIT		Uncharacterized protein OS=Oryctolagus cuniculus (Rabbit) GN=EXOC7 PE=4 SV=1			0	0	0	0	Typical	1	1	1	1		0	0	0	0		0	0	0	0		0	0	0	0		0	0	0	0		0	0	0	0		0	0	0	0		0	0	0	0
tr|G1SE57|G1SE57_RABIT	ARF4	Uncharacterized protein OS=Oryctolagus cuniculus (Rabbit) GN=ARF4 PE=3 SV=1			0	0	0	0		0	0	0	0	Typical	1	1	1	1		0	0	0	0		0	0	0	0		0	0	0	0		0	0	0	0		0	0	0	0		0	0	0	0
tr|G1SWN1|G1SWN1_RABIT	SNF8	Uncharacterized protein OS=Oryctolagus cuniculus (Rabbit) GN=SNF8 PE=4 SV=1			0	0	0	0	Typical	1	1	1	1		0	0	0	0		0	0	0	0		0	0	0	0		0	0	0	0		0	0	0	0		0	0	0	0		0	0	0	0
tr|G1SPX9|G1SPX9_RABIT	HELB	Uncharacterized protein OS=Oryctolagus cuniculus (Rabbit) GN=HELB PE=4 SV=2			0	0	0	0		0	0	0	0	Typical	1	1	1	1		0	0	0	0		0	0	0	0		0	0	0	0		0	0	0	0		0	0	0	0		0	0	0	0
tr|B7NZP9|B7NZP9_RABIT	FLNA	Filamin A, alpha isoform 2 (Predicted) OS=Oryctolagus cuniculus (Rabbit) GN=FLNA PE=4 SV=1			0	0	0	0	Typical	1	1	1	1		0	0	0	0		0	0	0	0		0	0	0	0		0	0	0	0		0	0	0	0		0	0	0	0		0	0	0	0
tr|U3KPA0|U3KPA0_RABIT	TSNAX-DISC1	Uncharacterized protein OS=Oryctolagus cuniculus (Rabbit) GN=TSNAX PE=4 SV=1			0	0	0	0	Typical	1	1	1	1		0	0	0	0		0	0	0	0		0	0	0	0		0	0	0	0		0	0	0	0		0	0	0	0		0	0	0	0
tr|G1TPB9|G1TPB9_RABIT	ABTB1	Uncharacterized protein OS=Oryctolagus cuniculus (Rabbit) GN=ABTB1 PE=4 SV=1			0	0	0	0	Typical	1	1	1	1		0	0	0	0		0	0	0	0		0	0	0	0		0	0	0	0		0	0	0	0		0	0	0	0		0	0	0	0
sp|P80912|HINT1_RABIT	HINT1 HINT	Histidine triad nucleotide-binding protein 1 OS=Oryctolagus cuniculus (Rabbit) GN=HINT1 PE=1 SV=2			0	0	0	0	Typical	1	1	1	1		0	0	0	0		0	0	0	0		0	0	0	0		0	0	0	0		0	0	0	0		0	0	0	0		0	0	0	0
tr|G1SFJ9|G1SFJ9_RABIT	CIAO1	Probable cytosolic iron-sulfur protein assembly protein CIAO1 OS=Oryctolagus cuniculus (Rabbit) GN=CIAO1 PE=3 SV=1			0	0	0	0	Typical	1	1	1	1		0	0	0	0		0	0	0	0		0	0	0	0		0	0	0	0		0	0	0	0		0	0	0	0		0	0	0	0
tr|G1SCK9|G1SCK9_RABIT	SLC16A10	Uncharacterized protein OS=Oryctolagus cuniculus (Rabbit) GN=SLC16A10 PE=4 SV=1			0	0	0	0	Typical	1	1	1	1		0	0	0	0		0	0	0	0		0	0	0	0		0	0	0	0		0	0	0	0		0	0	0	0		0	0	0	0
tr|G1SRZ8|G1SRZ8_RABIT	CNOT1	Uncharacterized protein OS=Oryctolagus cuniculus (Rabbit) GN=CNOT1 PE=4 SV=1		Typical	16	26	26	26	Typical	12	17	17	17	Typical	13	23	23	23	Typical	16	24	24	24	Typical	9	16	16	16	Typical	13	21	21	21	Typical	14	21	21	21	Typical	11	16	16	16	Typical	9	11	11	11
tr|G1TM82|G1TM82_RABIT	RPS21	40S ribosomal protein S21 OS=Oryctolagus cuniculus (Rabbit) GN=RPS21 PE=1 SV=1		Typical	4	15	15	15	Typical	5	20	20	20	Typical	4	21	21	21	Typical	4	21	21	21	Typical	4	22	22	22	Typical	4	27	27	27	Typical	4	23	23	23	Typical	3	19	19	19	Typical	3	20	20	20
tr|G1SLM1|G1SLM1_RABIT	CACYBP	Uncharacterized protein OS=Oryctolagus cuniculus (Rabbit) GN=CACYBP PE=4 SV=1		Typical	4	12	12	12	Typical	6	16	16	16	Typical	5	15	15	15	Typical	5	11	11	11	Typical	3	9	9	9	Typical	4	14	14	14	Typical	3	9	9	9	Typical	6	13	13	13	Typical	4	8	8	8
sp|P27124|FKBP4_RABIT	FKBP4 P59	Peptidyl-prolyl cis-trans isomerase FKBP4 OS=Oryctolagus cuniculus (Rabbit) GN=FKBP4 PE=1 SV=3		Typical	1	1	1	1	Typical	2	3	3	3		0	0	0	0	Typical	2	3	3	3	Typical	1	2	2	2		0	0	0	0		0	0	0	0	Typical	2	3	3	3	Typical	4	4	4	4
sp|O19049|HNRPK_RABIT	HNRNPK HNRPK	Heterogeneous nuclear ribonucleoprotein K OS=Oryctolagus cuniculus (Rabbit) GN=HNRNPK PE=2 SV=1		Typical	29	188	188	188	Typical	29	190	190	190	Typical	28	189	189	189	Typical	28	197	197	197	Typical	26	211	211	211	Typical	25	195	195	195	Typical	27	202	202	202	Typical	28	192	192	192	Typical	23	157	157	157
sp|P19134|TRFE_RABIT	TF	Serotransferrin OS=Oryctolagus cuniculus (Rabbit) GN=TF PE=1 SV=4		Typical	29	89	74	88.9284	Typical	32	96	77	95.9085	Typical	31	95	74	94.8985	Typical	28	86	76	85.9517	Typical	25	68	58	67.9534	Typical	21	54	47	53.9667	Typical	29	101	91	100.953	Typical	23	62	52	61.9534	Typical	24	59	49	58.9534
tr|G1SZ12|G1SZ12_RABIT	RPL14	Uncharacterized protein OS=Oryctolagus cuniculus (Rabbit) GN=RPL14 PE=4 SV=1		Typical	9	32	32	32	Typical	9	37	37	37	Typical	9	35	35	35	Typical	11	43	43	43	Typical	9	38	38	38	Typical	11	63	63	63	Typical	7	26	26	26	Typical	9	29	29	29	Typical	8	25	25	25
tr|G1TYL6|G1TYL6_RABIT	RPL19	Ribosomal protein L19 OS=Oryctolagus cuniculus (Rabbit) GN=RPL19 PE=3 SV=1		Typical	7	27	4	12.8791	Typical	9	37	11	21.0372	Typical	9	34	9	18.6512	Typical	10	41	10	21.9674	Typical	9	40	11	22.1953	Typical	8	42	12	23.5814	Typical	8	24	10	15.4047	Typical	9	22	7	12.7907	Typical	9	29	9	16.7209
tr|G1U001|G1U001_RABIT	RPL38 (InterPro)	Uncharacterized protein OS=Oryctolagus cuniculus (Rabbit) GN=LOC100352574 PE=3 SV=1		Typical	2	6	6	6	Typical	3	8	8	8	Typical	3	9	9	9	Typical	4	14	14	14	Typical	4	22	22	22	Typical	4	16	16	16	Typical	2	7	7	7	Typical	3	10	10	10	Typical	4	11	11	11
tr|G1T040|G1T040_RABIT	RPL44E (Interpro)	Uncharacterized protein OS=Oryctolagus cuniculus (Rabbit) GN=RPL36A-HNRNPH2 PE=1 SV=1		Typical	5	12	12	12	Typical	5	12	12	12	Typical	6	11	11	11	Typical	7	23	23	23	Typical	8	25	25	25	Typical	4	12	12	12	Typical	4	6	6	6	Typical	4	7	7	7	Typical	6	11	11	11
tr|G1SHR3|G1SHR3_RABIT	RUFY1	Uncharacterized protein OS=Oryctolagus cuniculus (Rabbit) GN=RUFY1 PE=4 SV=2		Typical	1	1	1	1	Typical	1	1	1	1	Typical	3	3	3	3	Typical	2	3	3	3		0	0	0	0	Typical	1	1	1	1	Typical	1	1	1	1		0	0	0	0	Typical	1	1	1	1
tr|G1SEI1|G1SEI1_RABIT	CLASP2	Uncharacterized protein OS=Oryctolagus cuniculus (Rabbit) GN=CLASP2 PE=4 SV=2		Typical	2	2	2	2	Typical	1	1	1	1	Typical	2	2	2	2	Typical	1	1	1	1		0	0	0	0	Typical	1	1	1	1	Typical	1	1	1	1		0	0	0	0	Typical	1	1	1	1
tr|G1TQM9|G1TQM9_RABIT	RPSA	40S ribosomal protein SA OS=Oryctolagus cuniculus (Rabbit) GN=RPSA PE=3 SV=2		Typical	12	43	0	0	Typical	11	37	0	0	Typical	10	39	0	0	Typical	13	47	0	0	Typical	13	60	0	0	Typical	14	45	0	0	Typical	9	28	0	0	Typical	11	32	0	0	Typical	10	33	0	0
tr|G1T5V3|G1T5V3_RABIT	RAB14	Uncharacterized protein OS=Oryctolagus cuniculus (Rabbit) GN=RAB14 PE=3 SV=1		Typical	5	11	7	8.73333	Typical	5	11	7	8.73333	Typical	5	9	7	7.86667	Typical	5	9	5	6.73333	Typical	3	7	3	4.73333	Typical	2	2	1	1.43333	Typical	5	9	5	6.73333	Typical	4	7	3	4.73333	Typical	2	5	1	2.73333
tr|G1T4Z2|G1T4Z2_RABIT	ACLY	ATP-citrate synthase OS=Oryctolagus cuniculus (Rabbit) GN=ACLY PE=3 SV=2			0	0	0	0	Typical	7	8	8	8	Typical	3	3	3	3	Typical	3	3	3	3		0	0	0	0		0	0	0	0		0	0	0	0	Typical	4	5	5	5	Typical	1	1	1	1
tr|G1SZZ2|G1SZZ2_RABIT	SRP9	Signal recognition particle 9 kDa protein OS=Oryctolagus cuniculus (Rabbit) GN=SRP9 PE=3 SV=1		Typical	6	16	16	16	Typical	7	14	14	14	Typical	7	21	21	21	Typical	6	17	17	17	Typical	4	13	13	13	Typical	5	16	16	16	Typical	4	15	15	15	Typical	4	12	12	12	Typical	4	10	10	10
tr|G1SCU8|G1SCU8_RABIT	OTUD6B	Uncharacterized protein OS=Oryctolagus cuniculus (Rabbit) GN=OTUD6B PE=4 SV=1		Typical	6	15	15	15	Typical	5	9	9	9	Typical	5	10	10	10	Typical	5	13	13	13	Typical	5	12	12	12	Typical	5	15	15	15	Typical	4	16	16	16	Typical	4	10	10	10	Typical	3	13	13	13
tr|G1SLM0|G1SLM0_RABIT	PABPC1	Polyadenylate-binding protein OS=Oryctolagus cuniculus (Rabbit) GN=PABPC1 PE=3 SV=1		Typical	32	122	59	108.25	Typical	30	107	48	93.75	Typical	30	115	54	101.75	Typical	33	137	64	121	Typical	35	155	73	137	Typical	30	144	65	126	Typical	25	108	50	95.25	Typical	28	120	59	106.25	Typical	30	111	59	99.5
tr|G1T139|G1T139_RABIT	RPS5 (InterPro)	Uncharacterized protein OS=Oryctolagus cuniculus (Rabbit) GN=TRAP1 PE=4 SV=2		Typical	1	2	2	2	Typical	1	3	3	3	Typical	1	3	3	3	Typical	1	2	2	2	Typical	1	3	3	3	Typical	1	3	3	3	Typical	1	2	2	2	Typical	1	2	2	2		0	0	0	0
tr|G1SRA8|G1SRA8_RABIT	EIF2S3	Eukaryotic translation initiation factor 2 subunit 3 OS=Oryctolagus cuniculus (Rabbit) GN=EIF2S3 PE=4 SV=2		Typical	10	22	22	22	Typical	9	18	18	18	Typical	9	17	17	17	Typical	8	14	14	14	Typical	5	12	12	12	Typical	5	11	11	11	Typical	7	14	14	14	Typical	6	15	15	15	Typical	6	13	13	13
tr|G1SI62|G1SI62_RABIT	PWP1	Uncharacterized protein OS=Oryctolagus cuniculus (Rabbit) GN=PWP1 PE=4 SV=1		Typical	4	4	4	4	Typical	2	2	2	2	Typical	2	2	2	2	Sameset	1	1	1	1	Sameset	1	1	1	1	Typical	1	1	1	1	Sameset	1	1	1	1	Typical	2	2	2	2	Sameset	1	1	1	1
tr|G1SIT9|G1SIT9_RABIT	YWHAB	Uncharacterized protein OS=Oryctolagus cuniculus (Rabbit) GN=YWHAB PE=3 SV=1		Typical	9	17	7	13.6955	Typical	7	15	9	12.2752	Typical	8	14	6	10.5856	Typical	7	14	10	11.86	Typical	7	18	10	14.0013	Typical	8	18	8	14.2104	Typical	8	18	9	13.9652	Typical	8	15	8	11.4452	Typical	9	18	9	13.8604
tr|G1SHS8|G1SHS8_RABIT	VTA1	Uncharacterized protein OS=Oryctolagus cuniculus (Rabbit) GN=VTA1 PE=4 SV=2		Typical	4	8	8	8	Typical	4	7	7	7	Typical	4	8	8	8	Typical	3	9	9	9	Typical	3	7	7	7	Typical	2	2	2	2	Typical	3	4	4	4	Typical	3	6	6	6	Typical	3	5	5	5
tr|G1SIJ8|G1SIJ8_RABIT	IPO4	Uncharacterized protein OS=Oryctolagus cuniculus (Rabbit) GN=IPO4 PE=4 SV=1		Typical	5	7	7	7	Typical	3	4	4	4	Typical	3	4	4	4	Typical	2	4	4	4	Typical	3	6	6	6	Typical	3	6	6	6	Typical	3	8	8	8	Typical	5	7	7	7	Typical	3	4	4	4
tr|G1T0L1|G1T0L1_RABIT	LSM3	Uncharacterized protein OS=Oryctolagus cuniculus (Rabbit) GN=LSM3 PE=4 SV=1			0	0	0	0	Typical	3	3	3	3	Typical	2	3	3	3	Typical	2	4	4	4		0	0	0	0		0	0	0	0	Typical	1	3	3	3	Typical	1	3	3	3	Typical	1	3	3	3
tr|G1SGX4|G1SGX4_RABIT	RPS16	Uncharacterized protein OS=Oryctolagus cuniculus (Rabbit) GN=RPS16 PE=1 SV=1		Typical	13	55	55	55	Typical	11	67	67	67	Typical	11	68	68	68	Typical	14	89	89	89	Typical	16	100	100	100	Typical	14	85	85	85	Typical	12	49	49	49	Typical	13	51	51	51	Typical	13	54	54	54
tr|G1SUX8|G1SUX8_RABIT	HSP70 (Interpro)	Uncharacterized protein OS=Oryctolagus cuniculus (Rabbit) GN=LOC100354435 PE=3 SV=1		Typical	14	43	14	15.7862	Typical	15	37	12	13.5388	Typical	12	40	12	13.7245	Typical	13	40	14	15.6008	Typical	13	34	12	13.3502	Typical	9	38	10	11.7218	Typical	13	41	20	21.2856	Typical	14	43	22	23.2882	Typical	13	39	19	20.2265
tr|G1SME4|G1SME4_RABIT	RBM4	Uncharacterized protein OS=Oryctolagus cuniculus (Rabbit) GN=LOC100355015 PE=4 SV=1			0	0	0	0	Typical	1	1	1	1	Typical	1	1	1	1	Typical	1	1	1	1	Sameset	1	1	1	1		0	0	0	0	Typical	2	2	2	2	Sameset	1	1	1	1	Sameset	1	1	1	1
tr|G1SPZ7|G1SPZ7_RABIT	GPX1	Glutathione peroxidase OS=Oryctolagus cuniculus (Rabbit) GN=GPX1 PE=3 SV=1			0	0	0	0	Typical	1	2	2	2		0	0	0	0	Typical	1	1	1	1	Typical	2	2	2	2	Typical	1	1	1	1	Typical	2	3	3	3	Typical	1	1	1	1		0	0	0	0
tr|G1T168|G1T168_RABIT	RPS10	Uncharacterized protein OS=Oryctolagus cuniculus (Rabbit) PE=1 SV=2		Typical	7	37	37	37	Typical	8	32	32	32	Typical	6	25	25	25	Typical	7	37	37	37	Typical	9	44	44	44	Typical	6	27	27	27	Typical	5	26	26	26	Typical	4	24	24	24	Typical	5	23	23	23
tr|G1SDJ7|G1SDJ7_RABIT	PABPC4	Polyadenylate-binding protein OS=Oryctolagus cuniculus (Rabbit) GN=PABPC4 PE=3 SV=2		Typical	19	70	11	28.75	Typical	23	75	18	35.25	Typical	24	76	19	36.25	Typical	23	93	24	45	Typical	22	98	23	44	Typical	22	103	26	49	Typical	17	72	17	33.75	Typical	17	77	19	35.75	Typical	19	70	20	35.5
tr|G1U8F0|G1U8F0_RABIT	AP2A1	Uncharacterized protein OS=Oryctolagus cuniculus (Rabbit) GN=AP2A1 PE=4 SV=1		Typical	14	36	36	36	Typical	13	30	30	30	Typical	15	29	29	29	Typical	11	30	30	30	Typical	11	23	23	23	Typical	12	29	29	29	Typical	11	24	24	24	Typical	11	26	26	26	Typical	12	24	24	24
tr|B7NZI5|B7NZI5_RABIT	EIF6 ITGB4BP	Eukaryotic translation initiation factor 6 OS=Oryctolagus cuniculus (Rabbit) GN=EIF6 PE=3 SV=1		Typical	1	1	1	1	Typical	1	1	1	1	Typical	1	1	1	1	Typical	2	2	2	2	Typical	2	3	3	3	Typical	1	1	1	1		0	0	0	0	Typical	1	1	1	1		0	0	0	0
tr|G1SJQ2|G1SJQ2_RABIT	GLG1	Uncharacterized protein OS=Oryctolagus cuniculus (Rabbit) GN=GLG1 PE=4 SV=2		Typical	1	1	1	1	Typical	1	1	1	1	Typical	1	1	1	1		0	0	0	0		0	0	0	0		0	0	0	0		0	0	0	0	Typical	1	1	1	1		0	0	0	0
tr|G1TFT4|G1TFT4_RABIT	VAMP3	Uncharacterized protein OS=Oryctolagus cuniculus (Rabbit) GN=VAMP3 PE=4 SV=1			0	0	0	0	Typical	2	2	2	2	Typical	1	1	1	1		0	0	0	0		0	0	0	0		0	0	0	0	Sameset	1	1	1	1		0	0	0	0		0	0	0	0
tr|G1SGK1|G1SGK1_RABIT	GIGYF2	Uncharacterized protein OS=Oryctolagus cuniculus (Rabbit) GN=GIGYF2 PE=4 SV=2		Typical	2	3	3	3	Typical	4	5	5	5	Typical	3	4	4	4	Typical	3	4	4	4	Typical	2	4	4	4	Typical	3	4	4	4	Typical	1	2	2	2	Typical	2	2	2	2	Typical	2	3	3	3
tr|G1SEQ2|G1SEQ2_RABIT	PBDC1	Uncharacterized protein OS=Oryctolagus cuniculus (Rabbit) GN=PBDC1 PE=4 SV=2			0	0	0	0	Typical	2	2	2	2	Typical	1	1	1	1	Typical	1	1	1	1	Typical	1	2	2	2		0	0	0	0		0	0	0	0		0	0	0	0	Typical	1	1	1	1
tr|G1SMG5|G1SMG5_RABIT	GSPT1	Uncharacterized protein OS=Oryctolagus cuniculus (Rabbit) GN=GSPT1 PE=4 SV=1			0	0	0	0	Typical	1	1	1	1	Typical	1	2	2	2	Typical	2	2	2	2		0	0	0	0		0	0	0	0		0	0	0	0		0	0	0	0	Typical	1	1	1	1
tr|G1T8X7|G1T8X7_RABIT	VCPIP1	Uncharacterized protein OS=Oryctolagus cuniculus (Rabbit) GN=VCPIP1 PE=4 SV=1			0	0	0	0	Typical	1	1	1	1	Typical	2	2	2	2	Typical	2	2	2	2		0	0	0	0		0	0	0	0	Typical	1	1	1	1		0	0	0	0		0	0	0	0
tr|G1SDA8|G1SDA8_RABIT	PSMA1	Uncharacterized protein OS=Oryctolagus cuniculus (Rabbit) GN=PSMA1 PE=4 SV=2		Typical	1	1	1	1	Typical	1	1	1	1	Typical	1	1	1	1		0	0	0	0		0	0	0	0	Typical	1	1	1	1		0	0	0	0	Typical	1	1	1	1		0	0	0	0
tr|G1SF19|G1SF19_RABIT	TMCC2	Uncharacterized protein OS=Oryctolagus cuniculus (Rabbit) GN=TMCC2 PE=4 SV=1		Typical	1	1	1	1	Typical	1	1	1	1	Typical	1	1	1	1	Typical	1	1	1	1		0	0	0	0		0	0	0	0		0	0	0	0	Typical	1	1	1	1		0	0	0	0
tr|G1SDY5|G1SDY5_RABIT	YWHAZ	Uncharacterized protein OS=Oryctolagus cuniculus (Rabbit) GN=YWHAZ PE=3 SV=1		Typical	4	6	2	2.42149	Typical	6	8	1	3.26251	Typical	4	8	1	1.64613	Typical	4	6	2	3.94211	Typical	5	9	2	3.42723	Typical	5	7	1	2.35878	Typical	5	9	2	5.04248	Typical	5	7	1	3.10498	Typical	6	10	3	5.23429
tr|G1SMY1|G1SMY1_RABIT	DDX17	Uncharacterized protein OS=Oryctolagus cuniculus (Rabbit) GN=DDX17 PE=3 SV=2		Subset	1	2	0	0.0236967	Subset	1	3	0	0.035545	Typical	2	3	1	1.0237	Typical	2	5	1	1.04739	Subset	1	3	0	0.035545	Subset	1	1	0	0.0118483	Typical	2	3	1	1.0237	Typical	2	5	1	1.04739	Typical	2	3	1	1.0237
tr|G1SNY1|G1SNY1_RABIT	TPR (InterPro)	Uncharacterized protein OS=Oryctolagus cuniculus (Rabbit) GN=IFIT1B PE=4 SV=1		Typical	27	149	39	92.0969	Typical	24	134	33	82.0032	Typical	25	126	27	75.0013	Typical	23	137	31	83.2722	Typical	22	151	32	90.7631	Typical	24	122	26	72.6951	Typical	23	159	43	101.504	Typical	23	131	27	79.0128	Typical	22	113	19	65.6973
tr|G1SFW9|G1SFW9_RABIT	ACIN1	Uncharacterized protein OS=Oryctolagus cuniculus (Rabbit) GN=ACIN1 PE=4 SV=1		Typical	6	7	7	7	Typical	4	8	8	8	Typical	5	10	10	10	Typical	5	8	8	8	Typical	6	9	9	9	Typical	3	5	5	5	Typical	6	10	10	10	Typical	3	5	5	5	Typical	2	2	2	2
tr|G1TP80|G1TP80_RABIT	RPL13 (InterPro)	Uncharacterized protein OS=Oryctolagus cuniculus (Rabbit) PE=3 SV=1		Typical	2	11	6	6.67039	Typical	2	10	6	6.53631	Typical	2	9	4	4.67039	Typical	2	12	7	7.67039	Typical	2	11	6	6.67039	Typical	3	13	7	7.80447	Typical	2	9	6	6.40223	Typical	2	6	3	3.40223	Typical	2	6	3	3.40223
tr|G1SV79|G1SV79_RABIT	TOM1L1	Uncharacterized protein OS=Oryctolagus cuniculus (Rabbit) GN=TOM1L1 PE=4 SV=1		Typical	2	2	2	2	Typical	3	3	3	3	Typical	3	4	4	4	Typical	1	2	2	2	Typical	2	4	4	4	Typical	2	3	3	3	Typical	1	2	2	2	Typical	1	2	2	2	Typical	1	1	1	1
tr|G1TTN7|G1TTN7_RABIT	KIF2A	Kinesin-like protein OS=Oryctolagus cuniculus (Rabbit) GN=KIF2A PE=3 SV=2		Typical	2	4	4	4	Typical	1	2	2	2	Typical	1	3	3	3	Typical	1	2	2	2	Typical	1	1	1	1	Typical	1	2	2	2	Typical	1	2	2	2	Typical	1	2	2	2	Typical	1	1	1	1
tr|G1T9H0|G1T9H0_RABIT	FAM98A	Uncharacterized protein OS=Oryctolagus cuniculus (Rabbit) GN=FAM98A PE=4 SV=1		Typical	1	1	1	1	Typical	4	6	6	6	Typical	3	3	3	3	Typical	3	3	3	3	Typical	3	3	3	3	Typical	1	1	1	1	Typical	3	4	4	4	Typical	3	6	6	6	Typical	2	3	3	3
tr|G1SS73|G1SS73_RABIT	DDX1	Uncharacterized protein OS=Oryctolagus cuniculus (Rabbit) GN=DDX1 PE=4 SV=2		Typical	18	53	53	53	Typical	17	41	41	41	Typical	13	41	41	41	Typical	12	42	42	42	Typical	14	44	44	44	Typical	12	36	36	36	Typical	15	53	53	53	Typical	16	48	48	48	Typical	15	36	36	36
sp|O77768|HNRPC_RABIT	HNRNPC	Heterogeneous nuclear ribonucleoprotein C OS=Oryctolagus cuniculus (Rabbit) GN=HNRNPC PE=2 SV=1		Typical	2	2	2	2	Typical	2	3	3	3	Typical	1	1	1	1		0	0	0	0		0	0	0	0		0	0	0	0	Typical	2	2	2	2		0	0	0	0	Typical	1	1	1	1
tr|G1T7U4|G1T7U4_RABIT	USP15	Uncharacterized protein OS=Oryctolagus cuniculus (Rabbit) GN=USP15 PE=4 SV=1		Typical	1	1	1	1	Typical	2	2	2	2	Typical	3	3	3	3		0	0	0	0		0	0	0	0		0	0	0	0		0	0	0	0		0	0	0	0	Typical	3	3	3	3
tr|G1U7G0|G1U7G0_RABIT	LOC100339496	Uncharacterized protein OS=Oryctolagus cuniculus (Rabbit) GN=GEMIN8 PE=4 SV=1		Typical	2	2	2	2	Typical	2	2	2	2	Typical	2	2	2	2	Typical	1	2	2	2	Typical	1	2	2	2	Typical	1	1	1	1	Typical	1	1	1	1	Typical	1	1	1	1	Typical	1	1	1	1
tr|G1TNY0|G1TNY0_RABIT		Uncharacterized protein OS=Oryctolagus cuniculus (Rabbit) GN=SH3BP1 PE=4 SV=1		Typical	6	7	7	7	Typical	2	3	3	3	Typical	2	3	3	3	Typical	2	3	3	3	Typical	1	2	2	2	Typical	1	1	1	1	Typical	3	4	4	4	Typical	1	1	1	1	Typical	2	3	3	3
tr|G1T647|G1T647_RABIT	GCLM	Uncharacterized protein OS=Oryctolagus cuniculus (Rabbit) GN=GCLM PE=4 SV=2		Typical	2	4	4	4		0	0	0	0	Typical	2	2	2	2	Typical	1	2	2	2		0	0	0	0	Typical	1	2	2	2		0	0	0	0	Typical	1	1	1	1	Typical	1	2	2	2
tr|G1SZN9|G1SZN9_RABIT	BTK	Tyrosine-protein kinase OS=Oryctolagus cuniculus (Rabbit) GN=BTK PE=3 SV=1		Typical	2	2	2	2	Typical	1	1	1	1		0	0	0	0		0	0	0	0		0	0	0	0		0	0	0	0	Typical	4	5	5	5		0	0	0	0		0	0	0	0
tr|G1T096|G1T096_RABIT	SNRPF	Uncharacterized protein OS=Oryctolagus cuniculus (Rabbit) GN=SNRPF PE=4 SV=1		Typical	1	1	1	1	Typical	1	2	2	2		0	0	0	0		0	0	0	0	Typical	1	1	1	1	Typical	1	1	1	1	Typical	1	2	2	2	Typical	1	2	2	2	Typical	1	1	1	1
tr|G1TNP7|G1TNP7_RABIT		Uncharacterized protein OS=Oryctolagus cuniculus (Rabbit) PE=4 SV=1		Subset	1	2	0	0.0745342	Subset	1	1	0	0.0372671		0	0	0	0	Typical	1	1	1	1	Typical	2	3	2	2.03727		0	0	0	0	Typical	2	2	1	1.03727	Typical	2	2	1	1.03727	Typical	1	1	1	1
tr|G1T1F0|G1T1F0_RABIT	RPS14	Uncharacterized protein OS=Oryctolagus cuniculus (Rabbit) GN=LOC100337691 PE=1 SV=1		Typical	9	45	45	45	Typical	9	52	52	52	Typical	9	48	48	48	Typical	9	59	59	59	Typical	9	56	56	56	Typical	9	60	60	60	Typical	9	51	51	51	Typical	9	48	48	48	Typical	9	46	46	46
tr|G1T0C1|G1T0C1_RABIT	RPL15	Ribosomal protein L15 OS=Oryctolagus cuniculus (Rabbit) GN=RPL15 PE=1 SV=1		Typical	11	63	63	63	Typical	12	86	86	86	Sameset	10	77	77	77	Typical	12	83	83	83	Typical	11	108	108	108	Sameset	9	94	94	94	Typical	10	72	72	72	Typical	10	78	78	78	Typical	10	72	72	72
tr|G1TPV0|G1TPV0_RABIT	RPL13	60S ribosomal protein L13 OS=Oryctolagus cuniculus (Rabbit) GN=LOC100352571 PE=3 SV=1		Typical	11	51	51	51	Typical	10	56	56	56	Typical	10	53	53	53	Typical	11	66	66	66	Typical	13	83	83	83	Typical	11	89	89	89	Typical	11	52	52	52	Typical	12	57	57	57	Typical	12	50	50	50
tr|G1SW77|G1SW77_RABIT	SERBP1	Uncharacterized protein OS=Oryctolagus cuniculus (Rabbit) GN=SERBP1 PE=4 SV=1		Typical	8	29	29	29	Typical	7	30	30	30	Typical	9	40	40	40	Typical	10	46	46	46	Typical	12	47	47	47	Typical	10	28	28	28	Typical	9	34	34	34	Typical	9	32	32	32	Typical	9	35	35	35
tr|Q0QEW4|Q0QEW4_RABIT	RPL18	Ribosomal protein L18 OS=Oryctolagus cuniculus (Rabbit) GN=RPL18 PE=2 SV=1		Typical	12	50	12	40.9103	Typical	13	61	16	50.4831	Typical	13	71	16	57.1022	Typical	13	95	22	75.4862	Typical	12	92	17	72.5146	Typical	13	78	26	64.8816	Typical	10	56	7	43.8959	Typical	9	60	12	48.2339	Typical	11	65	11	51.2054
tr|Q5UBU2|Q5UBU2_RABIT		Ribosomal protein L18 OS=Oryctolagus cuniculus (Rabbit) PE=2 SV=1		Typical	5	17	1	2.65161	Typical	6	22	2	4.06452	Typical	6	21	1	3.06452	Typical	6	24	2	4.27097	Typical	6	27	2	4.58064	Typical	6	21	2	3.96129	Typical	5	21	2	3.96129	Typical	5	21	2	3.96129	Typical	6	21	2	3.96129
tr|G1SQD1|G1SQD1_RABIT	EIF4G1	Eukaryotic translation initiation factor 4 gamma 1 OS=Oryctolagus cuniculus (Rabbit) GN=EIF4G1 PE=4 SV=2		Typical	33	81	66	80.7938	Typical	34	72	61	71.8591	Typical	31	75	64	74.8591	Typical	29	67	60	66.9038	Typical	30	75	67	74.89	Typical	24	56	48	55.89	Typical	32	88	78	87.8625	Typical	30	74	69	73.9313	Typical	26	62	61	61.9862
tr|G1SU37|G1SU37_RABIT	USP10	Uncharacterized protein OS=Oryctolagus cuniculus (Rabbit) GN=USP10 PE=4 SV=1		Typical	2	2	2	2	Typical	2	3	3	3	Typical	4	5	5	5	Typical	5	7	7	7	Typical	2	4	4	4	Typical	1	2	2	2	Typical	3	3	3	3	Typical	1	1	1	1	Typical	2	2	2	2
tr|G1TA47|G1TA47_RABIT	RPS4X	40S ribosomal protein S4 OS=Oryctolagus cuniculus (Rabbit) PE=3 SV=2		Typical	20	132	20	95.8605	Typical	23	139	22	101.247	Typical	23	147	23	106.988	Typical	24	161	32	119.375	Typical	25	170	33	125.794	Typical	22	188	27	136.049	Typical	22	140	24	102.57	Typical	20	134	26	99.1512	Typical	20	126	26	93.7326
tr|B7NZD2|B7NZD2_RABIT	PSMD4	Proteasome 26S subunit, non-ATPase, 4 (Predicted) OS=Oryctolagus cuniculus (Rabbit) GN=PSMD4 PE=4 SV=1			0	0	0	0	Typical	2	3	3	3	Typical	1	1	1	1	Typical	3	5	5	5	Typical	2	3	3	3	Typical	1	1	1	1	Typical	1	1	1	1	Typical	2	2	2	2	Typical	2	3	3	3
tr|G1SZD6|G1SZD6_RABIT	YWHAQ	14-3-3 protein theta OS=Oryctolagus cuniculus (Rabbit) GN=YWHAQ PE=3 SV=1		Subset	3	5	0	0.914381	Typical	4	6	3	3.31428	Sameset	5	9	4	4.72807	Sameset	4	6	4	4.10738	Sameset	6	9	3	3.78356	Subset	2	4	0	0.521176	Sameset	5	8	4	4.36797	Typical	4	7	3	3.36797	Typical	5	8	3	3.57487
tr|G1T1J9|G1T1J9_RABIT	BMP2K	Uncharacterized protein OS=Oryctolagus cuniculus (Rabbit) GN=BMP2K PE=4 SV=2		Typical	17	38	38	38	Typical	16	40	40	40	Typical	16	37	37	37	Typical	18	34	34	34	Typical	16	36	36	36	Typical	13	36	36	36	Typical	14	37	37	37	Typical	14	31	31	31	Typical	14	25	25	25
tr|G1T8F8|G1T8F8_RABIT	RPL22L1	Uncharacterized protein OS=Oryctolagus cuniculus (Rabbit) GN=RPL22L1 PE=4 SV=1		Typical	4	10	10	10	Typical	4	14	14	14	Typical	4	10	10	10	Typical	4	19	19	19	Typical	5	26	26	26	Typical	4	18	18	18	Typical	4	9	9	9	Typical	3	6	6	6	Typical	4	10	10	10
tr|G1SFR8|G1SFR8_RABIT	RPS12	40S ribosomal protein S12 OS=Oryctolagus cuniculus (Rabbit) GN=RPS12 PE=1 SV=1		Typical	12	65	65	65	Typical	13	83	83	83	Typical	13	88	88	88	Typical	13	104	104	104	Typical	13	114	114	114	Typical	16	138	138	138	Typical	8	71	71	71	Typical	13	81	81	81	Typical	12	79	79	79
sp|P19943|RLA2_RABIT	RPLP2	60S acidic ribosomal protein P2 OS=Oryctolagus cuniculus (Rabbit) GN=RPLP2 PE=1 SV=1		Typical	3	8	8	8	Typical	3	11	11	11	Typical	3	12	12	12	Typical	3	16	16	16	Typical	2	12	12	12	Typical	4	26	26	26	Typical	2	13	13	13	Typical	2	11	11	11	Typical	2	10	10	10
tr|G1SZ47|G1SZ47_RABIT	RPS23	Uncharacterized protein OS=Oryctolagus cuniculus (Rabbit) GN=RPS23 PE=1 SV=1		Typical	9	49	49	49	Typical	8	45	45	45	Typical	8	35	35	35	Typical	8	43	43	43	Typical	8	49	49	49	Typical	9	54	54	54	Typical	8	37	37	37	Typical	7	33	33	33	Typical	8	35	35	35
tr|G1TRM4|G1TRM4_RABIT	RPS11	Uncharacterized protein OS=Oryctolagus cuniculus (Rabbit) GN=RPS11 PE=1 SV=1		Typical	19	60	60	60	Typical	18	54	54	54	Typical	17	56	56	56	Typical	14	68	68	68	Typical	15	87	87	87	Typical	19	87	87	87	Typical	12	40	40	40	Typical	13	48	48	48	Typical	13	52	52	52
tr|G1SXN3|G1SXN3_RABIT	LAMA4	Uncharacterized protein OS=Oryctolagus cuniculus (Rabbit) GN=LAMA4 PE=4 SV=2		Typical	1	3	3	3	Typical	1	2	2	2	Typical	1	2	2	2		0	0	0	0		0	0	0	0		0	0	0	0	Typical	1	2	2	2	Typical	1	1	1	1	Typical	1	1	1	1
tr|G1T868|G1T868_RABIT	CLTB	Uncharacterized protein OS=Oryctolagus cuniculus (Rabbit) GN=CLTB PE=4 SV=1		Typical	2	2	2	2	Typical	1	2	2	2	Typical	2	3	3	3	Typical	1	1	1	1		0	0	0	0		0	0	0	0	Typical	2	3	3	3		0	0	0	0	Typical	1	1	1	1
tr|G1TN89|G1TN89_RABIT	HSPG2	Uncharacterized protein OS=Oryctolagus cuniculus (Rabbit) GN=HSPG2 PE=4 SV=2		Typical	6	12	12	12	Typical	5	9	9	9	Typical	5	9	9	9	Typical	4	8	8	8	Typical	4	11	11	11	Typical	2	5	5	5	Typical	4	7	7	7	Typical	4	10	10	10	Typical	3	5	5	5
tr|G1U7L1|G1U7L1_RABIT	RPL28 (InterPro)	Uncharacterized protein OS=Oryctolagus cuniculus (Rabbit) GN=LOC100358162 PE=1 SV=1		Typical	13	53	53	53	Typical	10	66	66	66	Typical	12	58	58	58	Typical	11	80	80	80	Typical	11	85	85	85	Typical	12	81	81	81	Typical	11	53	53	53	Typical	9	45	45	45	Typical	11	49	49	49
tr|G1T550|G1T550_RABIT	RAB5C	Uncharacterized protein OS=Oryctolagus cuniculus (Rabbit) GN=RAB5C PE=3 SV=1		Typical	6	7	5	6.61538	Sameset	2	4	0	3.23077		0	0	0	0	Typical	1	1	1	1	Typical	3	5	3	4.61538	Typical	3	5	5	5	Typical	2	2	2	2	Typical	1	2	2	2	Typical	2	3	3	3
tr|B7NZM4|B7NZM4_RABIT	DRG1	Developmentally regulated GTP binding protein 1 (Predicted) OS=Oryctolagus cuniculus (Rabbit) GN=DRG1 PE=4 SV=1		Typical	4	5	5	5	Typical	4	5	5	5	Typical	1	1	1	1	Typical	4	5	5	5	Typical	2	3	3	3	Typical	1	1	1	1	Typical	2	3	3	3	Typical	3	3	3	3	Typical	1	1	1	1
tr|G1TSM9|G1TSM9_RABIT	PRRC2A	Uncharacterized protein OS=Oryctolagus cuniculus (Rabbit) GN=PRRC2A PE=4 SV=1		Typical	4	8	8	8	Typical	7	10	9	9.58042	Typical	7	13	13	13	Typical	6	10	10	10	Typical	8	13	13	13	Typical	3	7	7	7	Typical	4	10	10	10	Typical	4	8	8	8	Typical	3	5	5	5
tr|G1SMM7|G1SMM7_RABIT	SNRPD3	Uncharacterized protein OS=Oryctolagus cuniculus (Rabbit) GN=SNRPD3 PE=4 SV=1		Typical	1	1	1	1	Typical	2	2	2	2	Typical	1	1	1	1	Typical	1	2	2	2	Typical	2	3	3	3		0	0	0	0		0	0	0	0	Typical	1	1	1	1	Typical	1	1	1	1
tr|G1SCR0|G1SCR0_RABIT	LAMTOR1	Uncharacterized protein OS=Oryctolagus cuniculus (Rabbit) GN=LAMTOR1 PE=4 SV=1		Typical	1	1	1	1	Typical	1	1	1	1	Typical	2	2	2	2	Typical	1	1	1	1		0	0	0	0		0	0	0	0	Typical	1	1	1	1	Typical	1	1	1	1		0	0	0	0
tr|G1SKM2|G1SKM2_RABIT	FBN1	Uncharacterized protein OS=Oryctolagus cuniculus (Rabbit) GN=FBN1 PE=4 SV=1		Typical	1	2	2	2		0	0	0	0	Typical	2	2	2	2	Typical	1	1	1	1	Typical	1	1	1	1		0	0	0	0	Typical	1	1	1	1	Typical	1	1	1	1		0	0	0	0
tr|G1T0U0|G1T0U0_RABIT		Uncharacterized protein OS=Oryctolagus cuniculus (Rabbit) GN=TIMM8A PE=4 SV=1		Typical	1	1	1	1	Typical	1	2	2	2	Typical	1	1	1	1		0	0	0	0	Typical	1	1	1	1	Typical	1	1	1	1	Typical	1	1	1	1	Typical	1	1	1	1		0	0	0	0
tr|G1ST44|G1ST44_RABIT	EXOSC8	Uncharacterized protein OS=Oryctolagus cuniculus (Rabbit) GN=EXOSC8 PE=4 SV=1			0	0	0	0	Typical	2	2	2	2	Typical	2	2	2	2	Typical	1	1	1	1	Typical	1	1	1	1		0	0	0	0	Typical	1	1	1	1	Typical	1	1	1	1		0	0	0	0
tr|G1SGV5|G1SGV5_RABIT	ABCF1	Uncharacterized protein OS=Oryctolagus cuniculus (Rabbit) GN=ABCF1 PE=3 SV=1		Typical	8	13	13	13	Typical	10	13	13	13	Typical	7	11	11	11	Typical	6	10	10	10	Typical	7	13	13	13	Typical	4	7	7	7	Typical	5	10	10	10	Typical	5	11	11	11	Typical	5	7	7	7
tr|G1T3Y8|G1T3Y8_RABIT	HSPD1	Uncharacterized protein OS=Oryctolagus cuniculus (Rabbit) GN=HSPD1 PE=3 SV=2		Typical	3	5	5	5	Typical	3	7	7	7	Typical	2	4	4	4	Typical	2	4	4	4	Typical	2	2	2	2	Typical	2	3	3	3	Typical	3	5	5	5	Typical	3	3	3	3	Typical	2	3	3	3
tr|G1U482|G1U482_RABIT	RPS3A	40S ribosomal protein S3a OS=Oryctolagus cuniculus (Rabbit) GN=LOC100352147 PE=3 SV=1		Typical	13	62	10	15.1705	Typical	12	64	6	11.767	Typical	12	60	6	11.3693	Typical	11	78	9	15.8608	Typical	12	97	12	20.4517	Typical	13	88	9	16.8551	Typical	11	58	6	11.1705	Typical	11	61	6	11.4687	Typical	11	62	6	11.5682
sp|P68105|EF1A1_RABIT	EEF1A1	Elongation factor 1-alpha 1 OS=Oryctolagus cuniculus (Rabbit) GN=EEF1A1 PE=1 SV=1		Typical	23	239	239	239	Typical	26	253	253	253	Typical	23	286	286	286	Typical	25	265	265	265	Typical	23	314	314	314	Typical	22	243	243	243	Typical	25	257	257	257	Typical	24	228	228	228	Typical	21	174	174	174
tr|G1U522|G1U522_RABIT	PRKAR2A	Uncharacterized protein OS=Oryctolagus cuniculus (Rabbit) GN=PRKAR2A PE=4 SV=2		Typical	1	1	1	1		0	0	0	0		0	0	0	0		0	0	0	0		0	0	0	0		0	0	0	0	Typical	1	1	1	1		0	0	0	0	Typical	1	1	1	1
tr|G1TM29|G1TM29_RABIT	ALDH16A1	Uncharacterized protein OS=Oryctolagus cuniculus (Rabbit) GN=ALDH16A1 PE=4 SV=1			0	0	0	0	Typical	1	1	1	1		0	0	0	0		0	0	0	0		0	0	0	0		0	0	0	0	Typical	1	1	1	1	Typical	1	1	1	1		0	0	0	0
tr|G1TA37|G1TA37_RABIT	BANF1	Uncharacterized protein OS=Oryctolagus cuniculus (Rabbit) GN=BANF1 PE=4 SV=1			0	0	0	0	Typical	1	1	1	1		0	0	0	0		0	0	0	0		0	0	0	0		0	0	0	0	Typical	1	1	1	1		0	0	0	0	Typical	1	1	1	1
tr|G1U3P4|G1U3P4_RABIT		Uncharacterized protein OS=Oryctolagus cuniculus (Rabbit) GN=RNASEH2C PE=4 SV=1			0	0	0	0		0	0	0	0	Typical	1	1	1	1		0	0	0	0		0	0	0	0		0	0	0	0	Typical	1	1	1	1	Typical	1	1	1	1		0	0	0	0
tr|G1TC10|G1TC10_RABIT	UBE2M	Uncharacterized protein OS=Oryctolagus cuniculus (Rabbit) GN=UBE2M PE=3 SV=1			0	0	0	0	Typical	1	1	1	1		0	0	0	0		0	0	0	0		0	0	0	0		0	0	0	0	Typical	1	1	1	1	Typical	1	1	1	1		0	0	0	0
tr|G1T5Y3|G1T5Y3_RABIT	VPS26B	Uncharacterized protein OS=Oryctolagus cuniculus (Rabbit) GN=VPS26B PE=4 SV=2			0	0	0	0	Typical	1	1	1	1		0	0	0	0	Typical	1	1	1	1		0	0	0	0		0	0	0	0		0	0	0	0	Typical	1	1	1	1	Typical	1	1	1	1
tr|G1SD50|G1SD50_RABIT	CLK2	Uncharacterized protein OS=Oryctolagus cuniculus (Rabbit) GN=CLK2 PE=3 SV=2			0	0	0	0	Typical	1	1	1	1		0	0	0	0	Typical	1	1	1	1		0	0	0	0		0	0	0	0		0	0	0	0	Typical	1	1	1	1	Typical	1	1	1	1
tr|G1SYV9|G1SYV9_RABIT	TLN1	Uncharacterized protein OS=Oryctolagus cuniculus (Rabbit) GN=TLN1 PE=4 SV=1		Typical	12	18	18	18	Typical	12	16	16	16	Typical	8	10	10	10	Typical	4	8	8	8	Typical	6	13	13	13	Typical	8	11	10	10.8195	Typical	6	13	13	13	Typical	7	11	11	11	Typical	6	10	10	10
tr|G1SZ94|G1SZ94_RABIT	AGFG1	Uncharacterized protein OS=Oryctolagus cuniculus (Rabbit) PE=4 SV=1			0	0	0	0		0	0	0	0	Typical	1	1	1	1	Typical	1	2	2	2		0	0	0	0		0	0	0	0		0	0	0	0	Typical	1	1	1	1	Typical	1	1	1	1
tr|G1SMA9|G1SMA9_RABIT	RAB15	Uncharacterized protein OS=Oryctolagus cuniculus (Rabbit) GN=RAB15 PE=3 SV=1		Typical	1	4	4	4	Typical	1	4	4	4	Typical	1	2	2	2	Typical	1	4	4	4	Typical	1	4	4	4	Typical	1	1	1	1	Typical	1	4	4	4	Typical	1	4	4	4	Typical	1	4	4	4
tr|G1SWY0|G1SWY0_RABIT	RAB6A	Uncharacterized protein OS=Oryctolagus cuniculus (Rabbit) GN=RAB6A PE=3 SV=1		Typical	1	4	4	4	Typical	1	4	4	4	Typical	1	2	2	2	Typical	1	4	4	4	Typical	1	4	4	4	Typical	1	1	1	1	Typical	1	4	4	4	Typical	1	4	4	4	Typical	1	4	4	4
tr|G1TKX0|G1TKX0_RABIT		Uncharacterized protein OS=Oryctolagus cuniculus (Rabbit) PE=4 SV=1		Typical	1	4	4	4	Typical	1	4	4	4	Typical	1	2	2	2	Typical	1	4	4	4	Typical	1	4	4	4	Typical	1	1	1	1	Typical	1	4	4	4	Typical	1	4	4	4	Typical	1	4	4	4
tr|G1T0T3|G1T0T3_RABIT	GEMIN5	Uncharacterized protein OS=Oryctolagus cuniculus (Rabbit) GN=GEMIN5 PE=4 SV=1		Typical	8	15	15	15	Typical	8	12	12	12	Typical	7	8	8	8	Typical	6	9	9	9	Typical	6	10	10	10	Typical	5	10	10	10	Typical	8	14	14	14	Typical	8	13	13	13	Typical	5	10	10	10
tr|D7R608|D7R608_RABIT	ELAVL1	ELAV-like protein OS=Oryctolagus cuniculus (Rabbit) GN=ELAVL1 PE=2 SV=1		Typical	4	5	5	5	Typical	5	5	5	5	Typical	2	2	2	2	Typical	2	2	2	2	Typical	3	5	5	5	Typical	2	3	3	3	Typical	4	6	6	6	Typical	4	5	5	5	Typical	3	3	3	3
tr|G1TQS9|G1TQS9_RABIT	RRBP1	Uncharacterized protein OS=Oryctolagus cuniculus (Rabbit) GN=RRBP1 PE=4 SV=1		Typical	3	4	4	4	Typical	3	3	3	3	Typical	3	5	5	5	Typical	3	5	5	5	Typical	3	6	6	6	Typical	1	3	3	3	Typical	3	6	6	6	Typical	3	5	5	5	Typical	2	3	3	3
tr|G1T3B8|G1T3B8_RABIT	KIF2C	Kinesin-like protein OS=Oryctolagus cuniculus (Rabbit) GN=KIF2C PE=3 SV=1		Typical	4	6	6	6	Typical	4	5	5	5	Typical	2	3	3	3	Typical	3	7	7	7	Typical	5	7	7	7	Typical	2	5	5	5	Typical	3	6	6	6	Typical	3	6	6	6	Typical	3	4	4	4
tr|G1SJ93|G1SJ93_RABIT	PARP12	Uncharacterized protein OS=Oryctolagus cuniculus (Rabbit) GN=PARP12 PE=4 SV=2		Typical	5	9	9	9	Typical	6	7	7	7	Typical	5	8	8	8	Typical	3	4	4	4	Typical	2	3	3	3	Typical	1	2	2	2	Typical	7	10	10	10	Typical	7	11	11	11	Typical	4	5	5	5
tr|G1SYU7|G1SYU7_RABIT	RPL39 (InterPro)	Uncharacterized protein OS=Oryctolagus cuniculus (Rabbit) PE=1 SV=1		Typical	2	8	8	8	Typical	1	8	8	8	Typical	1	7	7	7	Typical	1	20	20	20	Typical	1	17	17	17	Typical	1	11	11	11	Typical	1	8	8	8	Typical	1	8	8	8	Typical	1	9	9	9
[truncated: 186 more rows]
[truncated: 22 more columns]

## Sheet: COMPARE OLD
nanoLC-MSMS RESULTS: proteins
[truncated: 848 more rows]

[truncated: 1 more sheets: Feuil4]
